# Supplementary material for: Acute kidney disease in hospitalized acute kidney injury patients
Source: PeerJ. 2021 May 24;9:e11400. doi: 10.7717/peerj.11400 (PMC8158174; doi:10.7717/peerj.11400)
Supplement: Supplemental Information 10 [file peerj-09-11400-s010.xlsx]

## Sheet: Sheet1
IDs	ID	ICU admission	Gender	Age	Age2categories	Hypertension	DM	DMComplication	Cardial Infarction	Congestive heartfailure	Peripherial vascular disease	Cerevascular disease	chronic Liver disease	moderate to severe liver disease	Connective tissue disease	Leukemia	Lymphoma	Dementia	Hemiplegia	COPD	Tumor	Tumor metastasis	Peptic ulcer	All kinds of cancer	Cardial vascular surgery	Surgery	Sepsis	CKD	Proteinuria	Hyperuricemia	Hypoalbuminemia	Anemia	AKI classification	AKIstage	AKItype	Acidosis	acute heart failure	Shock	Respiratory failure	Mechanical ventilation	Liver dysfunction	Hematological dysfunction	Gastrointestinal bleeding	Neurological dysfunction	Organ failure 2 categories	RBC	Hb	HCT	PLT
1	68712	1	2	76	1	1	1	0	0	1	1	0	0	0	0	0	0	0	0	0	0	0	0	0	0	0	0	0	1	1	0	1	1	3	2	0	1	0	0	0	0	0	0	0	1	4	116	36.2	377
2	126979	0	1	47	0	0	0	0	0	0	0	0	1	0	0	0	0	0	0	0	0	0	0	0	0	1	0	0	0	0	0	0	1	1	2	0	0	0	0	0	1	1	0	1	1	2.36	76	22.5	45
3	207327	0	2	72	1	1	0	0	0	0	0	0	0	0	0	0	0	0	0	0	1	0	0	1	0	0	0	0	0	1	0	1	2	1	2	0	0	0	0	0	1	0	0	0	0	3.59	103	31	226
4	332410	0	1	50	0	0	0	0	0	0	0	0	1	1	0	0	0	0	0	0	0	0	0	0	0	0	0	0	0	0	1	1	1	3	1	0	0	0	0	0	1	1	0	0	1	2.57	98	28.8	29
5	191084	0	1	71	1	0	1	0	0	0	0	0	0	0	0	0	0	0	0	0	1	0	0	1	0	0	0	0	1	1	0	1	3	3	1	1	0	0	0	0	0	0	0	0	0	2.6	82	26.8	135
6	430580	0	1	52	0	0	0	0	0	0	0	0	0	0	0	0	0	0	0	0	0	0	0	0	0	0	0	0	0	0	0	1	1	1	1	0	0	0	0	0	0	0	0	0	0	3.19	95	29.3	284
7	410988	1	2	67	1	1	0	0	0	1	0	0	0	0	0	0	0	0	0	0	0	0	0	0	0	0	0	0	0	1	0	0	2	1	2	0	1	0	0	0	0	0	0	0	0	4.83	142	43.7	223
8	429790	1	2	34	0	0	0	0	0	0	0	0	0	0	0	0	0	0	0	0	0	0	0	0	0	1	0	0	1	0	0	1	1	1	2	0	0	1	0	1	0	0	0	0	0	2.91	89	26.8	144
9	415357	0	2	67	1	0	0	0	0	0	0	0	0	0	0	0	0	0	0	0	0	0	0	0	0	0	1	0	1	0	1	1	2	2	1	0	0	1	0	1	0	0	0	1	0	3.15	95	28.1	99
10	435490	1	1	39	0	0	0	0	0	0	0	0	0	0	0	0	0	0	0	0	0	0	0	0	0	0	0	0	0	1	1	0	1	2	1	0	0	1	0	1	0	0	0	1	0	3.79	116	34.3	248
11	443980	0	2	67	1	1	0	0	0	0	0	1	0	0	0	0	0	0	0	0	1	0	0	1	0	0	0	0	0	0	1	1	1	2	1	0	0	0	0	0	0	0	0	0	0	3.36	94	30.6	252
12	452374	0	1	63	0	0	0	0	0	0	0	0	0	0	0	0	0	0	0	0	0	0	0	0	0	0	0	0	1	0	0	0	2	3	1	0	0	0	0	0	1	1	0	0	1	4.28	138	41.3	40
13	444343	0	2	44	0	0	0	0	0	0	0	0	0	0	0	0	0	0	0	0	0	0	0	0	0	0	0	0	0	0	1	1	2	1	1	0	0	0	0	0	0	0	1	0	0	3.37	95	30	164
14	439412	0	2	41	0	0	0	0	0	0	0	0	0	0	0	0	0	0	0	0	0	0	0	0	0	0	0	0	0	0	0	0	1	1	1	1	0	0	0	0	0	0	0	0	0	4.06	120	36	271
15	452859	0	1	19	0	0	0	0	0	0	0	1	0	0	0	0	0	0	0	0	0	0	0	0	0	0	0	0	0	0	0	0	1	2	1	0	0	0	0	0	0	0	0	1	0	3.4	104	31.6	82
16	462933	1	1	67	1	1	0	0	0	0	0	1	0	0	0	0	0	0	0	0	0	0	0	0	0	0	0	0	0	0	0	0	1	1	2	0	0	0	0	1	1	0	0	1	1	2.14	75	20.7	289
17	466524	0	2	47	0	0	0	0	0	0	0	1	0	0	0	0	0	0	0	0	0	0	0	0	0	0	0	0	0	0	1	1	3	2	1	1	0	0	0	0	0	0	0	0	1	2.29	69	19.2	420
18	469145	1	1	43	0	0	0	0	0	0	0	0	0	0	0	0	0	0	0	0	0	0	0	0	0	1	0	0	1	0	0	1	1	1	2	0	0	0	0	1	1	0	0	1	1	1.68	60	16.7	343
19	468502	1	2	58	0	0	0	0	0	0	0	1	0	0	0	0	0	0	0	0	0	0	0	0	0	0	0	0	0	0	1	0	1	1	1	0	0	0	0	0	0	0	0	0	0	3.9	121	36.2	195
20	455949	0	1	32	0	0	1	0	0	0	0	0	0	0	0	0	0	0	0	0	0	0	0	0	0	0	0	0	1	0	1	1	1	2	2	0	0	0	0	0	0	0	0	0	0	1.45	43	13.3	157
21	460005	1	2	49	0	1	0	0	0	0	0	1	0	0	0	0	0	0	0	0	0	0	0	0	0	0	1	0	0	1	1	0	1	3	1	1	0	1	0	0	1	1	0	0	1	3.79	102	30.6	18
22	472302	0	2	32	0	0	0	0	0	0	0	0	0	0	0	0	0	0	0	0	0	0	0	0	0	0	0	0	1	0	0	0	2	1	1	0	0	0	0	0	0	0	0	0	0	4.43	127	39.6	145
23	470953	1	2	65	1	1	0	0	0	1	0	0	0	0	0	0	0	0	0	0	0	0	0	0	0	0	0	0	0	1	0	1	1	2	1	0	1	0	1	1	1	0	0	0	1	2.44	64	22.2	180
24	224111	0	1	79	1	0	0	0	0	0	0	0	0	0	0	0	0	0	0	0	0	0	1	0	0	1	0	0	0	0	1	1	1	1	2	0	0	0	0	0	0	0	1	0	0	0.27	85	24.3	196
25	225625	0	2	83	1	1	0	0	0	0	0	1	0	0	0	0	0	0	0	0	0	0	0	0	0	0	0	0	0	1	0	1	1	2	1	1	0	0	0	0	0	0	0	0	0	2.99	85	32.3	93
26	368038	0	1	70	1	1	0	0	0	0	0	0	0	0	0	0	0	0	0	0	0	0	0	0	0	0	0	0	0	0	0	0	1	1	2	1	0	0	0	0	0	0	0	0	0	5	141	42.2	896
27	429461	1	2	47	0	0	0	0	0	1	0	0	0	0	1	0	0	0	0	0	0	0	0	0	0	0	1	0	1	0	1	1	1	3	1	1	1	1	1	0	0	1	0	0	1	1.67	54	16.7	9
28	430579	0	1	50	0	1	1	1	0	1	1	0	0	0	0	0	0	0	0	0	0	0	0	0	0	0	0	0	1	0	1	1	1	1	2	0	1	0	0	0	0	0	0	0	0	3.6	98	32	356
29	429494	0	1	57	0	0	0	0	0	0	0	0	0	0	0	0	0	0	0	0	0	0	0	0	0	0	0	0	1	0	0	0	1	3	1	1	0	0	0	0	0	1	0	0	0	4.46	140	41.1	38
30	431184	0	2	57	0	0	1	0	0	0	1	0	0	0	0	0	0	0	0	0	0	0	0	0	0	0	0	0	0	1	0	1	1	1	1	0	0	0	0	0	0	0	1	0	0	4.21	89	30.7	161
31	429749	1	1	31	0	0	1	1	0	0	1	0	0	0	0	0	0	0	0	0	0	0	0	0	0	0	0	0	1	0	1	1	1	1	2	0	0	0	0	0	0	0	0	0	0	2.83	75	22.5	367
32	447443	1	1	23	0	0	0	0	0	0	0	0	0	0	0	0	0	0	0	0	0	0	0	0	0	0	0	0	1	0	0	0	2	2	1	0	0	0	0	0	0	0	0	0	0	4.22	120	36.6	210
33	441236	1	1	44	0	0	0	0	0	0	0	0	1	1	0	0	0	0	0	0	0	0	0	0	0	0	0	0	0	0	0	0	1	1	1	1	0	0	0	0	1	1	0	0	1	4.85	149	43.1	44
34	433914	0	1	77	1	1	0	0	0	0	1	1	0	0	0	0	0	0	0	0	0	0	0	0	0	0	0	0	0	0	0	0	1	2	1	1	0	0	0	0	0	0	0	0	0	4.73	144	43.6	142
35	392883	0	1	74	1	0	0	0	0	0	0	0	0	0	0	0	0	0	0	0	1	1	0	1	0	0	0	0	0	0	0	1	2	1	2	0	0	0	0	0	0	0	0	0	0	3.65	92	28.7	270
36	449178	1	1	32	0	0	0	0	0	0	0	0	0	0	0	0	0	0	0	0	0	0	0	0	0	0	0	0	1	0	1	0	1	3	1	1	0	0	0	1	0	0	0	0	0	5.21	170	48	279
37	437776	0	1	61	0	0	0	0	0	0	0	0	0	0	0	0	0	0	0	0	0	0	0	0	0	0	0	0	1	0	0	1	3	3	1	1	0	0	0	0	0	0	0	0	0	3.29	97	28.5	305
38	438801	0	1	64	0	1	0	0	0	1	0	0	0	0	0	0	0	0	0	0	0	0	0	0	0	0	0	0	0	0	0	0	2	2	2	0	1	0	0	0	0	0	0	0	1	4.13	126	39.2	269
39	394486	0	2	64	0	1	1	0	0	0	0	0	1	0	0	0	0	0	0	0	1	0	0	1	0	0	0	0	0	0	0	0	1	1	1	0	0	0	0	0	0	0	0	0	0	3.67	106	32.3	290
40	418288	1	1	80	1	1	0	0	0	0	0	1	0	0	0	0	0	0	0	0	0	0	0	0	0	0	0	0	1	0	0	0	3	1	1	0	0	0	0	0	0	0	0	0	0	3.29	113	33.1	97
41	451477	0	1	44	0	0	0	0	0	0	0	0	1	0	0	0	0	0	0	0	0	0	0	0	0	0	0	0	0	0	1	0	1	3	1	0	0	0	0	0	0	0	0	0	0	5.37	183	54.4	141
42	472703	0	1	64	0	0	0	0	0	0	0	0	0	0	0	0	0	0	0	0	0	0	0	0	0	0	0	0	1	0	0	0	1	2	1	1	0	0	0	0	0	1	0	0	1	4.88	147	42	7
43	460457	1	2	45	0	1	1	0	0	0	1	0	1	1	0	0	0	0	0	0	0	0	0	0	0	0	1	0	0	0	1	1	1	1	2	0	0	0	1	1	1	1	0	1	1	3.27	99	30.5	51
44	462332	0	2	17	0	0	0	0	0	0	0	0	0	0	0	0	0	0	0	0	0	0	0	0	0	0	0	0	0	0	0	1	1	1	2	0	0	0	0	0	0	0	0	0	0	3.08	96	30	204
45	454763	1	1	48	0	0	0	0	0	0	0	1	0	0	0	0	0	0	0	0	0	0	0	0	0	0	0	0	0	0	1	1	1	2	1	0	0	1	0	1	0	0	0	1	1	2.17	68	21.1	68
46	464087	1	1	48	0	0	0	0	0	0	0	0	0	0	0	0	0	0	0	0	0	0	0	0	0	0	0	0	1	0	0	0	1	1	2	0	0	0	0	1	0	0	0	1	0	5.28	118	38	279
47	54749	0	1	70	1	0	0	0	0	0	0	0	0	0	0	0	0	0	0	0	0	0	0	0	0	0	0	0	0	1	1	0	1	3	1	0	0	0	0	0	0	0	0	0	0	4.32	136	44.6	157
48	135427	0	1	80	1	1	0	0	0	1	0	1	0	0	0	0	0	0	0	1	0	0	0	0	0	0	0	0	0	1	0	0	1	3	1	1	1	0	0	0	1	0	0	0	1	3.85	118	36	173
49	267337	0	2	47	0	0	1	0	0	0	0	1	1	0	0	0	0	0	0	0	0	0	0	0	0	0	0	0	0	1	0	0	1	2	2	0	0	0	0	0	0	0	0	0	0	4.76	143	42.6	131
50	370841	1	1	52	0	0	0	0	0	0	0	0	0	0	0	0	0	0	0	0	0	0	1	0	0	1	0	0	0	1	0	0	1	1	2	0	0	0	0	0	0	0	0	0	0	4.3	120	36.2	260
51	431016	1	1	59	0	0	0	0	0	0	0	0	0	0	0	0	0	0	0	0	1	0	0	1	0	1	0	0	0	0	1	1	1	1	2	0	0	1	0	0	0	0	0	0	0	3.68	99	31.9	347
52	435094	1	1	35	0	0	0	0	0	0	0	0	0	0	0	0	0	0	0	0	0	0	0	0	0	0	0	0	0	0	0	0	1	1	1	0	0	0	0	1	0	0	0	0	0	4.47	134	38.4	302
53	448819	1	1	39	0	0	0	0	0	0	0	0	0	0	0	0	0	0	0	0	0	0	0	0	0	1	0	0	0	1	0	0	1	1	2	0	0	0	0	1	0	0	0	1	1	4	117	36.8	155
54	453312	0	1	77	1	1	0	0	0	0	0	0	0	0	0	0	0	0	0	1	0	0	0	0	0	0	0	0	1	1	1	1	1	3	2	1	0	0	0	0	0	1	0	0	0	2.58	79	24	50
55	447124	0	1	42	0	0	0	0	0	0	0	0	0	0	0	0	0	0	0	0	0	0	0	0	0	0	0	0	0	0	0	1	1	1	2	0	0	0	0	0	1	0	0	0	0	2.7	85	26.6	166
56	459635	1	2	21	0	0	0	0	0	0	0	0	0	0	0	0	0	0	0	0	0	0	0	0	0	0	0	0	0	0	0	1	4	2	2	0	0	0	0	0	0	0	0	0	0	4.35	78	24.9	591
57	468655	0	1	32	0	0	0	0	0	0	0	0	1	1	0	0	0	0	0	0	0	0	0	0	0	1	0	0	0	1	1	1	1	3	2	1	0	0	0	0	1	0	0	0	1	2.49	81	24.6	80
58	466439	1	2	60	0	0	0	0	0	0	0	0	0	0	0	0	0	0	0	0	1	0	0	1	0	0	1	0	0	0	0	0	1	2	1	1	0	1	0	1	0	1	1	1	1	1.54	47	14.4	52
59	452775	0	1	51	0	1	1	1	0	0	1	0	1	1	0	0	0	0	0	0	0	0	0	0	0	0	0	0	0	1	1	1	1	3	1	1	0	0	0	0	0	0	0	0	0	2.75	88	27.1	63
60	461044	1	1	22	0	0	0	0	0	0	0	0	0	0	0	0	0	0	0	0	0	0	0	0	0	0	0	0	0	0	1	0	1	2	1	0	0	1	0	0	0	0	0	0	0	2.19	72	18.6	61
61	123258	0	1	80	1	1	1	0	0	0	0	0	0	0	0	0	1	0	0	0	1	0	0	1	0	0	0	0	0	1	1	0	1	3	2	1	0	0	0	0	0	0	0	1	1	4.24	110	34.6	64
62	143492	1	1	51	0	0	0	0	0	1	0	0	0	0	0	0	0	0	0	0	0	0	0	0	0	0	0	0	0	1	0	0	1	1	2	1	1	0	0	0	0	0	0	0	0	4.02	127	38.1	189
63	429117	0	1	57	0	1	0	0	0	0	0	0	0	0	0	0	0	0	0	0	0	0	0	0	0	0	0	0	0	0	0	1	3	3	1	1	0	0	0	0	0	0	0	0	0	2.51	78	23.5	149
64	430159	0	1	55	0	0	0	0	0	0	0	0	0	0	0	0	0	0	0	0	0	0	0	0	0	0	0	0	0	0	1	0	1	3	1	0	0	0	0	0	0	1	0	1	0	4.25	134	37.5	24
65	430169	1	1	49	0	0	0	0	0	0	1	0	1	1	0	0	0	0	0	0	0	0	0	0	0	0	0	0	0	0	0	1	1	1	1	0	0	0	0	0	0	0	0	0	0	4.49	114	36.2	126
66	428924	1	1	79	1	1	0	0	0	1	0	0	0	0	0	0	0	0	0	0	1	0	1	1	0	0	0	0	0	1	1	1	1	3	1	1	1	1	0	0	0	0	1	0	1	2.2	64	19.8	157
67	424708	1	1	71	1	0	0	0	0	0	0	1	1	0	0	0	0	0	0	0	0	0	1	0	0	0	0	0	0	1	1	1	1	2	2	1	0	1	0	0	0	0	1	1	0	1.28	39	12.6	196
68	430492	0	2	77	1	1	0	0	0	0	0	1	0	0	0	0	0	0	0	0	0	0	0	0	0	0	0	0	1	1	0	0	1	3	1	1	0	0	0	0	0	0	0	0	0	3.75	116	34.2	275
69	436560	0	1	81	1	0	0	0	1	1	0	0	0	0	0	0	0	0	0	0	0	0	0	0	0	0	0	0	0	0	0	0	1	2	2	0	1	0	0	0	0	0	0	0	0	3.24	101	30.1	233
70	447267	0	2	45	0	0	0	0	0	0	0	0	0	0	0	0	0	0	0	0	1	0	0	1	0	0	0	0	1	1	0	0	2	1	1	0	0	0	0	0	0	0	0	0	0	4.87	147	43.3	575
71	432888	1	1	41	0	1	0	0	0	1	0	0	0	0	0	0	0	0	0	0	0	0	0	0	0	0	0	0	1	0	1	0	1	1	2	0	1	0	0	1	1	0	0	1	1	2.62	77	23.5	101
72	435746	1	1	71	1	1	0	0	0	0	0	0	1	1	0	0	0	0	0	0	1	0	0	1	0	0	1	0	0	0	0	1	1	3	2	1	0	0	0	1	1	0	0	1	1	3.48	93	28.3	206
73	453582	0	1	63	0	0	0	0	0	0	0	0	0	0	0	0	0	0	0	0	0	0	0	0	0	0	1	0	1	0	0	0	1	1	1	0	0	0	0	1	0	0	0	1	1	4.82	151	45.9	263
74	462816	0	1	70	1	0	0	0	0	0	0	0	0	0	0	0	0	0	0	0	0	0	0	0	0	1	0	0	0	0	0	0	1	1	2	0	0	0	0	0	0	0	0	0	0	3.6	116	30.7	199
75	472716	0	2	70	1	0	0	0	0	0	0	0	1	0	0	0	0	0	0	0	0	0	0	0	0	1	0	0	0	0	0	0	1	3	1	0	0	0	0	0	1	0	0	0	1	3.84	116	35.8	83
76	187478	1	1	71	1	0	0	0	1	0	0	0	0	0	0	0	0	0	0	0	0	0	0	0	0	0	0	0	0	0	1	0	1	1	1	0	0	0	0	0	1	0	0	0	0	3.27	115	35.5	347
77	432458	0	2	59	0	0	1	0	0	0	0	0	1	0	0	0	0	0	0	0	0	0	0	0	0	0	0	0	0	0	0	0	3	2	1	0	0	0	0	0	0	0	0	0	0	4	111	34.7	97
78	452559	0	1	67	1	0	0	0	0	0	0	0	0	0	0	0	0	0	0	0	0	0	0	0	0	0	0	0	0	0	0	0	1	1	1	0	0	0	0	0	1	0	1	0	1	4.19	132	40.3	148
79	466175	1	1	71	1	0	1	0	0	0	0	0	0	0	0	0	0	0	0	0	0	0	1	0	0	0	0	0	0	0	0	1	1	1	1	1	0	1	0	1	0	0	1	1	1	2.6	76	23	62
80	475925	1	2	69	1	1	1	0	0	1	0	0	0	0	0	0	0	0	0	1	0	0	0	0	0	0	0	0	0	0	0	0	1	1	1	0	1	0	1	1	1	0	0	1	1	4.12	134	43.7	213
81	147084	0	2	52	0	0	1	0	0	0	0	0	1	0	0	0	0	0	0	0	0	0	0	0	0	0	0	0	0	1	1	1	3	1	1	1	0	0	0	0	0	0	0	0	0	3.33	84	25.2	163
82	435278	1	1	53	0	0	1	0	0	0	0	0	1	1	0	0	0	0	0	0	0	0	0	0	0	0	1	0	0	0	1	1	1	2	1	0	0	0	0	1	1	1	1	1	1	3.53	122	34.8	8
83	445074	1	1	58	0	0	0	0	0	0	0	0	0	0	0	0	0	0	0	0	0	0	0	0	0	0	0	0	0	0	0	0	1	1	1	1	0	0	0	0	0	0	0	0	1	3.37	102	32.2	153
84	472860	1	2	46	0	0	1	0	0	0	0	0	0	0	0	0	0	0	0	0	0	0	0	0	0	0	0	0	1	0	0	0	1	2	1	1	0	0	0	0	0	0	0	1	1	4.44	129	38.5	181
85	451763	1	2	52	0	0	0	0	0	1	0	0	0	0	0	0	0	0	0	0	0	0	0	0	0	0	0	0	0	1	0	0	1	2	2	0	1	0	0	1	0	1	0	0	0	3.53	102	30.7	44
86	463876	1	1	58	0	0	0	0	0	0	0	0	1	1	0	0	0	0	0	0	0	0	0	0	0	0	0	0	0	0	0	0	1	1	2	0	0	0	0	1	1	0	1	0	0	2.39	75	23.1	70
87	458665	0	2	63	0	0	0	0	0	0	1	0	0	0	0	0	0	0	0	0	0	0	0	0	0	0	0	0	0	0	1	1	1	1	2	0	0	1	0	0	0	0	0	0	0	2.38	69	21.2	62
88	455185	0	2	66	1	0	0	0	0	0	0	0	1	0	0	0	0	0	0	0	1	1	0	1	0	1	0	0	0	0	0	1	1	1	2	0	0	0	0	0	1	0	0	0	0	4.81	136	43.6	281
89	473913	1	2	57	0	0	0	0	0	0	0	1	0	0	0	0	0	0	0	0	0	0	0	0	0	1	1	0	1	0	0	0	1	3	2	0	1	1	0	1	0	0	0	0	0	3.24	101	30.4	60
90	432470	1	1	41	0	0	0	0	0	0	0	0	1	1	0	0	0	0	0	0	1	0	0	1	0	1	0	0	0	0	0	1	1	1	2	0	0	0	0	0	1	0	0	0	0	4.09	115	35.6	73
91	424531	0	1	74	1	1	0	0	0	1	0	0	0	0	0	0	0	0	0	0	1	0	0	1	0	1	0	0	0	0	0	0	1	1	2	0	1	0	0	0	0	0	0	0	0	3.3	104	31.8	106
92	431600	1	1	84	1	1	0	0	0	0	0	0	0	0	0	0	0	0	0	0	1	0	1	1	0	1	1	0	1	0	0	0	1	2	1	1	0	0	1	1	0	1	1	1	1	2.39	70	20.6	12
93	390368	0	2	62	0	1	0	0	0	0	0	0	1	1	0	0	0	0	0	0	0	0	0	0	0	1	0	0	1	1	0	1	1	3	2	1	0	0	0	1	1	0	0	0	0	3.32	98	31.2	203
94	371811	1	2	42	0	1	1	0	0	0	0	0	0	0	0	0	0	0	0	0	0	0	0	0	0	0	0	0	1	0	1	1	1	1	2	0	0	0	0	1	0	0	0	0	0	3.04	99	27.6	174
95	462811	1	2	57	0	0	0	0	1	0	0	1	0	0	0	0	0	0	0	0	0	0	1	0	0	0	0	0	0	1	0	0	1	3	2	1	1	0	0	1	0	1	1	1	1	3.61	111	33.7	30
96	445996	0	1	69	1	1	0	0	0	0	0	0	0	0	0	0	0	0	0	0	0	0	1	0	0	0	0	0	1	0	0	1	1	3	2	0	0	0	0	0	0	0	1	0	0	3.09	97	29.2	257
97	442589	1	2	80	1	1	0	0	0	0	1	0	0	0	1	0	0	0	0	0	0	0	0	0	0	0	0	0	1	0	1	0	1	3	2	0	0	0	0	0	0	0	0	0	0	3.1	92	26.6	343
98	428142	0	1	31	0	0	0	0	0	1	0	0	0	0	0	0	0	0	0	0	0	0	0	0	0	0	0	0	0	1	0	0	1	1	2	0	1	0	0	0	0	0	0	0	0	5.83	158	48	271
99	426306	0	1	50	0	1	1	0	0	0	0	0	0	0	0	0	0	0	0	0	0	0	1	0	0	1	0	0	0	0	0	1	1	1	2	0	0	0	0	0	0	0	1	0	0	3.5	101	31.7	206
100	393614	0	1	65	1	1	0	0	0	0	0	0	0	0	0	0	0	0	0	0	0	0	0	0	0	1	0	0	1	1	0	0	1	3	2	0	0	0	0	0	0	0	0	0	0	4.91	108	34	169
101	300702	0	1	81	1	1	0	0	0	0	0	1	0	0	0	0	0	0	0	0	0	0	0	0	0	0	0	0	1	0	0	0	1	2	2	0	0	0	0	0	0	0	0	1	0	4.04	117	35.4	319
102	437202	1	2	66	1	0	0	0	0	0	0	0	0	0	0	0	0	0	0	0	0	0	0	0	0	1	0	0	1	1	1	0	1	3	2	0	0	0	0	0	0	0	0	0	0	3.42	101	30.5	79
103	473869	0	1	69	1	1	0	0	0	0	0	0	0	0	0	0	1	0	0	0	0	0	0	1	0	0	0	0	0	1	0	1	1	2	2	0	0	0	0	0	0	0	0	0	0	3.41	80	26.9	608
104	467979	0	1	59	0	0	1	0	0	0	0	0	1	1	0	0	0	0	0	0	0	0	0	0	0	1	0	0	0	0	0	0	1	3	2	0	0	0	0	1	1	0	0	0	1	3.89	120	35.7	65
105	469354	1	1	70	1	0	1	0	0	0	0	0	0	0	0	0	0	0	0	0	0	0	0	0	0	0	0	0	1	0	1	1	1	1	2	0	0	0	0	1	1	0	0	0	0	2	63	20.7	131
106	458156	0	1	54	0	0	0	0	0	0	0	0	1	1	0	0	0	0	0	0	0	0	0	0	0	0	0	0	0	0	0	1	1	2	2	0	0	0	0	0	1	0	0	0	0	2.78	96	27.6	73
107	438134	1	1	88	1	0	0	0	0	0	0	1	0	0	0	0	0	0	0	1	0	0	0	0	0	0	0	0	1	0	1	1	1	1	2	0	0	0	0	1	0	0	0	1	0	3.24	61	20.6	217
108	445611	0	2	56	0	0	0	0	0	0	0	0	1	0	0	0	0	0	0	0	0	0	0	0	0	0	0	0	0	0	0	1	1	1	1	0	0	0	0	1	0	0	0	0	0	2.83	88	27.9	139
109	432828	0	1	45	0	0	1	1	0	0	1	0	1	0	0	0	0	0	0	0	0	0	0	0	0	0	1	0	1	0	0	0	1	3	2	0	0	0	0	1	0	1	0	1	1	4.12	122	36.3	18
110	438783	1	1	48	0	0	0	0	0	0	0	0	1	1	0	0	0	0	0	0	0	0	1	0	0	1	0	0	0	1	1	1	1	2	2	0	0	0	0	0	0	1	1	0	0	2.09	69	20.2	30
111	432668	1	2	52	0	0	1	0	0	1	0	0	0	0	0	0	0	0	0	0	0	0	0	0	1	1	0	0	0	0	0	0	1	1	2	0	1	0	1	1	0	0	0	0	0	2.81	89	25.9	61
112	436643	0	1	82	1	0	0	0	0	0	0	0	0	0	0	0	0	0	0	0	0	0	0	0	0	0	0	0	0	0	0	0	1	1	1	0	0	0	0	0	1	0	0	0	0	3.63	100	30.8	135
113	444262	0	1	51	0	0	0	0	0	0	0	0	0	0	0	0	0	0	0	0	0	0	0	0	0	0	0	0	0	1	1	0	1	2	1	0	0	0	0	0	0	1	0	0	0	4.16	128	37.7	50
114	435109	0	2	53	0	0	0	0	0	0	0	0	0	0	0	0	0	0	0	0	1	0	0	1	0	0	0	0	0	1	0	0	1	1	2	0	0	0	0	0	0	0	0	0	0	4.65	131	39.8	358
115	435936	1	1	47	0	0	0	0	0	0	0	0	1	1	0	0	0	0	0	0	0	0	0	0	0	0	0	0	1	1	1	0	1	1	2	0	0	0	0	0	1	0	0	0	0	3.97	115	34.6	188
116	470494	0	1	48	0	0	1	0	0	0	0	0	0	0	0	0	0	0	0	0	1	0	1	1	0	1	0	0	1	0	0	0	1	3	2	0	0	0	0	0	0	0	0	0	0	3.54	100	31.7	239
117	461563	1	1	60	0	1	0	0	0	0	0	1	1	0	0	0	0	0	0	0	0	0	0	0	0	0	0	0	1	0	0	0	1	1	2	0	0	0	0	1	1	0	0	1	0	3.61	110	34.8	103
118	468435	1	1	67	1	1	1	0	0	0	0	0	0	0	0	0	0	0	0	0	0	0	0	0	0	0	0	0	1	1	1	0	1	3	2	1	0	0	0	0	0	0	0	0	0	5.15	140	44	358
119	467879	1	1	50	0	1	1	1	0	0	1	1	0	0	0	0	0	0	0	0	0	0	0	0	0	0	0	0	1	1	0	0	1	3	2	1	0	0	1	1	0	0	0	1	1	3.9	111	36.1	331
120	467045	1	2	83	1	1	0	0	1	0	0	0	0	0	0	0	0	0	0	0	0	0	0	0	0	0	0	0	0	1	1	1	1	3	2	0	0	0	0	0	0	0	0	1	0	3.01	88	27.5	268
121	441813	1	2	41	0	1	1	0	0	0	0	0	0	0	0	0	0	0	0	0	1	0	0	1	0	1	0	0	1	0	1	0	1	2	2	0	0	0	1	1	0	0	0	1	0	3.45	88	29.8	211
122	443180	0	1	68	1	0	1	0	0	0	0	0	0	0	0	0	0	0	0	0	0	0	0	0	0	1	0	0	1	0	0	0	1	1	2	0	0	0	0	0	0	0	0	0	0	3.02	101	30.7	398
123	999	1	1	68	1	1	0	0	0	0	1	0	1	1	0	0	0	0	0	0	1	1	0	1	0	1	0	0	0	1	0	1	1	3	2	0	0	0	0	0	0	1	0	0	0	3.03	87	27.6	0.69
124	435671	0	2	62	0	1	1	0	0	1	0	1	0	0	0	0	0	0	0	0	0	0	0	0	0	0	0	0	1	1	0	0	1	3	2	0	1	0	0	0	0	0	0	0	0	3.54	106	31.7	201
125	437220	0	2	63	0	0	0	0	0	0	0	0	1	0	0	0	0	0	0	0	0	0	0	0	0	1	0	0	1	0	1	1	1	3	2	0	0	0	0	0	1	0	0	0	0	2.74	80	23.5	230
126	428889	0	1	63	0	1	0	0	0	0	0	0	0	0	0	0	0	0	0	0	0	0	0	0	0	0	0	0	1	1	1	0	1	3	1	0	0	0	0	0	0	0	0	0	0	3.21	101	30.5	73
127	431243	1	2	77	1	0	1	1	0	0	1	0	0	0	0	0	0	0	0	0	0	0	0	0	0	1	0	0	0	0	1	1	1	3	2	0	0	0	0	0	0	0	1	0	0	2	64	18.4	86
128	420727	0	1	54	0	1	1	0	0	0	0	0	1	1	0	0	0	0	0	0	0	0	0	0	0	0	0	0	1	1	1	0	1	1	2	0	0	0	0	0	1	0	0	0	0	2.59	87	26.8	76
129	368268	0	1	63	0	0	0	0	0	0	0	0	0	0	0	0	0	0	0	0	0	0	0	0	0	0	0	0	0	0	0	0	2	1	2	0	0	0	0	0	1	0	0	0	0	4.63	135	43	161
130	430164	0	1	60	0	0	0	0	0	0	0	0	1	0	0	0	0	0	0	0	0	0	0	0	0	0	0	0	0	0	0	0	1	1	2	1	0	0	0	0	0	0	0	0	0	4.06	111	34.6	189
131	447385	0	2	27	0	0	0	0	0	0	0	0	1	1	0	0	0	0	0	0	0	0	0	0	0	0	0	0	0	0	0	0	1	1	1	0	0	0	0	0	1	0	0	0	0	4.84	133	40.3	106
132	457322	0	1	65	1	0	0	0	0	0	0	0	0	0	0	0	0	0	0	0	1	0	0	1	0	1	0	0	0	0	0	0	1	1	2	0	0	0	0	0	0	0	0	0	0	4.05	131	39.6	222
133	465837	0	2	44	0	0	1	0	0	0	0	0	0	0	0	0	0	0	0	0	0	0	0	0	0	0	0	0	0	1	0	0	1	1	1	1	0	0	0	0	0	0	0	0	0	4.62	145	41.6	144
134	430945	0	2	54	0	1	0	0	0	0	0	0	0	0	0	0	0	0	0	0	1	0	0	1	0	0	0	0	0	1	1	0	2	1	2	0	0	0	0	0	0	0	0	0	0	4.16	123	37.3	478
135	237495	1	1	85	1	1	0	0	0	0	0	0	0	0	0	0	0	0	0	1	0	0	0	0	0	0	0	0	0	0	0	1	1	2	2	1	0	0	1	1	0	0	0	1	1	3	85	26.3	372
136	252697	0	1	60	0	0	0	0	0	0	0	0	1	0	0	0	0	0	0	0	0	0	0	0	0	0	0	0	0	0	1	0	1	1	1	0	0	1	0	0	0	0	0	0	0	3.87	109	33.9	122
137	291124	1	1	49	0	0	0	0	0	0	0	1	1	1	0	0	0	0	0	0	0	0	0	0	0	0	0	0	0	0	0	0	1	1	1	0	0	0	0	0	1	0	0	1	1	3.61	122	36.6	61
138	452384	0	1	68	1	1	0	0	0	0	0	0	0	0	0	0	0	0	0	0	0	0	0	0	0	0	0	0	0	0	1	1	1	1	1	0	0	1	0	0	0	1	1	0	0	2.65	76	22.1	58
139	440195	0	1	47	0	0	0	0	0	0	0	0	0	0	0	0	0	0	0	0	1	0	1	1	0	0	0	0	0	0	0	0	1	1	1	0	0	0	0	0	0	0	0	0	0	3.36	101	31.5	202
140	437032	0	1	48	0	0	1	0	0	0	0	0	1	0	0	0	0	0	0	0	0	0	1	0	0	1	0	0	0	0	0	0	1	1	1	0	0	0	0	0	0	0	0	0	0	4.05	121	36.3	227
141	463837	1	1	61	0	0	0	0	1	0	0	0	0	0	0	0	0	0	0	0	0	0	0	0	0	0	0	0	0	0	0	0	1	1	1	0	0	0	0	1	1	0	0	1	1	4.74	152	45.7	144
142	469448	0	1	48	0	0	0	0	0	0	0	0	0	0	0	0	0	0	0	0	0	0	1	0	0	1	0	0	0	0	0	0	1	1	2	0	0	0	0	0	1	0	0	0	0	5.15	165	50.7	130
143	255151	0	1	78	1	1	0	0	0	0	0	1	0	0	0	0	0	0	0	0	1	0	0	1	0	0	0	0	0	0	0	0	1	1	1	0	0	0	0	0	0	0	0	0	0	3.32	105	31.4	171
144	374511	0	1	68	1	0	0	0	0	0	0	0	0	0	0	0	0	0	0	0	1	1	0	1	0	0	0	0	0	0	1	1	1	1	1	0	0	0	0	0	1	0	0	0	0	1.77	77	18.7	189
145	450987	0	2	53	0	0	0	0	0	0	0	0	0	0	0	0	0	0	0	0	1	0	0	1	0	1	0	0	0	0	1	0	1	1	2	0	0	0	0	0	0	0	0	0	0	3.38	99	31	179
146	468221	0	2	47	0	1	0	0	0	0	0	0	0	0	0	0	0	0	0	0	1	0	0	1	0	1	0	0	0	0	0	0	1	2	2	0	0	0	0	0	0	0	0	0	0	3.88	105	34.2	520
147	473729	0	1	66	1	0	0	0	0	0	0	0	1	0	0	0	0	0	0	0	0	0	0	0	0	0	0	0	0	1	0	0	1	1	1	1	0	0	0	0	1	0	0	0	0	4.64	150	43	208
148	474346	0	1	57	0	0	0	0	0	0	0	1	0	0	0	0	0	0	0	0	0	0	0	0	0	0	0	0	0	0	0	0	1	1	1	0	0	0	0	0	1	0	0	1	1	3.86	128	39.4	133
149	428895	1	2	49	0	0	0	0	0	0	0	0	0	0	0	0	0	0	0	0	0	0	0	0	0	0	0	0	0	0	1	1	1	1	1	0	0	0	0	0	0	1	0	0	0	2.39	72	21.4	3
150	440720	0	1	70	1	1	0	0	0	0	0	0	0	0	0	0	0	0	0	0	0	0	0	0	0	0	0	0	0	0	0	0	3	1	1	0	0	0	0	0	0	0	0	0	0	3.57	112	34.2	301
151	436722	0	1	43	0	0	0	0	0	0	0	0	1	0	0	0	0	0	0	0	0	0	0	0	0	0	0	0	0	0	0	0	1	1	1	0	0	0	0	0	0	1	0	1	0	3.69	116	33.3	17
152	434877	0	1	45	0	0	0	0	0	0	0	0	0	0	0	0	0	0	0	0	1	0	1	1	0	0	0	0	0	0	0	0	1	1	2	0	0	0	0	0	0	0	0	0	0	4.74	136	43.1	238
153	439933	0	2	46	0	0	0	0	0	0	0	0	0	0	0	0	0	0	0	0	1	0	0	1	0	0	0	0	0	0	0	1	1	1	2	0	0	0	0	0	0	0	0	0	0	4.5	94	30.8	273
154	435204	1	2	63	0	0	0	0	0	0	0	0	0	0	0	0	0	0	0	0	0	0	0	0	0	1	0	0	0	1	0	0	1	1	2	0	0	0	0	1	1	0	0	1	1	4.82	93	30.9	172
155	454240	0	2	67	1	1	0	0	0	0	0	1	0	0	0	0	0	0	0	0	0	0	0	0	0	1	0	0	0	0	0	0	2	1	2	0	0	0	0	0	0	0	0	0	0	4.62	133	41	134
156	430469	1	2	54	0	1	0	0	0	0	0	1	0	0	0	0	0	0	0	0	0	0	0	0	0	0	0	0	0	0	0	0	1	1	2	0	0	0	0	0	0	0	0	1	0	3.49	106	31.6	303
157	460808	0	1	47	0	0	0	0	0	0	0	0	0	0	0	0	0	0	0	0	0	0	0	0	0	1	0	0	0	0	0	0	3	1	2	0	0	0	0	0	0	0	0	0	0	4.06	144	38	132
158	464181	0	2	82	1	1	1	0	0	0	0	0	1	0	0	0	0	0	0	0	0	0	0	0	0	0	0	0	0	0	0	1	2	1	2	1	0	0	0	0	1	0	0	0	0	2.6	90	24.3	184
159	465996	0	2	35	0	0	0	0	0	0	0	0	0	0	0	0	0	0	0	0	0	0	0	0	0	0	0	0	0	0	0	0	4	2	2	0	0	0	0	0	0	0	0	0	0	4.2	141	38.1	225
160	429368	0	1	50	0	0	0	0	0	0	0	0	0	0	0	0	0	0	0	0	1	0	0	1	0	0	0	0	0	0	0	0	2	2	2	0	0	0	0	0	0	0	0	0	0	3.16	100	30.1	112
161	465789	0	2	50	0	0	0	0	0	0	0	0	0	0	0	0	0	0	0	0	1	0	0	1	0	0	0	0	0	0	0	0	2	2	1	0	0	0	0	0	0	0	0	0	0	4.68	135	41.9	304
162	403806	0	2	59	0	0	0	0	0	0	0	0	0	0	0	0	0	0	0	0	0	0	0	0	0	0	0	0	0	0	0	1	4	2	2	0	0	0	0	0	1	1	0	0	1	2.85	76	24.6	34
163	447772	0	1	45	0	0	0	0	0	0	0	0	1	1	0	0	0	0	0	0	0	0	0	0	0	0	0	0	0	1	1	1	1	2	1	0	0	0	0	0	1	0	1	0	0	2.4	80	23.6	68
164	417355	0	1	71	1	0	0	0	0	0	0	0	0	0	0	0	0	0	0	0	1	1	0	1	0	0	0	0	0	0	1	1	1	1	2	0	0	0	0	0	0	1	1	0	0	2.28	71	21.9	41
165	445308	0	2	32	0	0	0	0	0	0	0	0	0	0	0	0	0	0	0	0	1	0	0	1	0	0	0	0	0	0	0	1	4	2	1	0	0	0	0	0	0	0	0	0	0	3.28	101	30.5	281
166	473300	0	2	65	1	0	1	0	0	0	0	0	0	0	0	0	0	0	0	0	0	0	0	0	0	1	0	0	0	0	0	0	1	1	2	0	0	0	0	0	0	0	0	0	0	3.68	106	32.1	277
167	296568	0	2	83	1	1	1	1	0	1	0	0	0	0	0	0	0	0	0	0	0	0	0	0	0	0	0	0	0	0	0	0	1	1	2	0	1	0	0	0	0	0	0	0	0	4.09	135	38.4	267
168	465152	0	2	44	0	0	0	0	0	0	0	0	0	0	0	0	0	0	0	0	1	0	0	1	0	1	0	0	0	0	0	0	1	2	2	0	0	0	0	0	0	0	0	0	0	3.1	105	27.6	197
169	461311	0	1	37	0	0	0	0	0	0	1	0	0	0	0	0	0	0	0	0	0	0	1	0	0	0	0	0	0	0	0	0	1	1	2	0	0	0	0	0	0	0	0	0	0	3.48	111	30.5	104
170	465402	0	1	52	0	0	0	0	0	0	0	0	0	0	0	0	0	0	0	0	1	0	0	1	0	0	0	0	0	0	0	0	4	2	2	1	0	0	0	0	0	0	0	0	0	2.3	72	25.1	107
171	462143	0	1	39	0	1	0	0	0	0	0	1	0	0	0	0	0	0	0	0	0	0	0	0	0	0	0	0	0	0	0	0	1	1	2	1	0	0	0	0	0	0	0	0	0	4.57	152	39.7	101
172	469044	0	1	75	1	1	0	0	1	0	0	0	0	0	0	0	0	0	0	0	0	0	0	0	0	0	0	0	0	0	0	0	1	2	2	1	0	0	0	0	0	0	0	0	1	3.44	125	34.2	260
173	177292	1	1	50	0	0	0	0	0	0	0	0	0	0	0	0	0	0	0	0	0	0	0	0	0	0	0	0	0	0	0	0	1	3	1	0	0	0	0	0	1	0	0	0	1	5.5	190	55.3	312
174	138371	1	1	67	1	0	0	0	0	1	0	0	0	0	0	0	0	0	0	0	0	0	1	0	0	0	1	0	1	1	1	1	1	3	1	1	1	1	1	1	1	0	1	0	1	1.94	52	16.1	394
175	383845	1	1	90	1	1	0	0	0	1	0	0	0	0	0	0	0	0	0	1	0	0	0	0	0	0	1	0	1	0	0	0	1	3	2	1	1	1	1	1	0	0	1	1	1	3.47	108	32.3	145
176	441277	0	1	58	0	0	0	0	0	0	0	0	1	0	0	0	0	0	0	0	0	0	0	0	0	0	0	0	0	0	0	1	4	2	1	0	0	0	0	0	0	0	0	0	0	3.06	92	28.4	133
177	437252	1	1	45	0	0	1	0	0	0	0	0	1	0	0	0	0	0	0	0	0	0	0	0	0	0	1	0	1	0	1	0	1	3	1	1	0	1	0	1	0	0	1	1	1	5.56	183	55.2	84
178	448112	1	1	38	0	0	0	0	0	0	0	0	0	0	0	0	0	0	0	0	0	0	0	0	0	0	0	0	0	1	0	0	1	3	1	0	0	0	0	0	0	0	0	0	0	5.76	175	54.4	246
179	447032	0	1	56	0	0	0	0	0	0	0	0	0	0	0	0	0	0	0	0	0	0	0	0	0	1	0	0	1	0	1	0	3	2	1	0	0	0	0	0	0	0	0	0	0	4.88	143	45.6	210
180	449033	0	2	71	1	0	0	0	0	0	0	0	0	0	0	0	0	0	0	0	0	0	0	0	0	0	0	0	1	1	1	0	1	1	1	0	0	0	0	0	0	0	0	0	0	3.28	104	32.7	154
181	381267	1	2	67	1	0	0	0	0	0	0	0	0	0	0	0	0	0	0	0	1	0	0	1	0	0	0	0	1	1	0	1	3	3	1	1	0	0	0	0	0	0	0	0	0	3.39	98	23.8	164
182	449655	0	1	66	1	0	0	0	0	0	0	0	0	0	0	0	0	0	0	0	0	0	0	0	0	0	0	0	1	1	0	0	1	2	1	0	0	0	0	0	0	0	0	0	0	4.83	151	45.3	494
183	454737	1	1	63	0	0	0	0	0	0	0	0	0	0	0	0	0	0	0	0	0	0	0	0	0	1	1	0	1	0	0	1	1	2	1	1	0	1	1	1	1	1	1	1	1	2.62	96	31.4	12
184	88088	0	2	44	0	0	1	0	0	0	0	0	0	0	1	0	0	0	0	0	0	0	0	0	0	0	0	0	1	1	0	1	2	1	1	0	0	0	0	0	0	0	0	0	0	3.61	94	30	166
185	468613	0	1	58	0	1	1	1	0	0	1	0	1	0	0	0	0	0	0	0	0	0	0	0	0	0	1	0	1	1	1	0	1	3	1	0	0	0	0	0	1	1	0	0	1	3.37	119	34.8	23
186	459406	0	1	47	0	0	0	0	0	1	0	0	1	0	0	0	0	0	0	0	0	0	0	0	0	0	0	0	1	1	0	1	2	2	1	0	1	0	0	0	0	0	0	0	0	2.57	64	19.9	111
187	468468	1	1	60	0	0	0	0	0	0	0	0	0	0	0	0	0	0	0	0	0	0	0	0	0	0	0	0	999	1	0	0	3	3	1	0	0	0	0	1	0	1	0	0	0	3.39	103	31.4	52
188	468246	1	1	73	1	1	0	0	0	1	0	1	0	0	0	0	0	0	0	0	0	0	0	0	0	0	0	0	0	0	1	0	4	3	2	1	1	0	0	1	0	0	0	1	1	2.96	95	28.9	124
189	469625	1	1	45	0	0	1	0	0	0	0	1	1	0	0	0	0	0	0	0	0	0	0	0	0	0	1	0	1	1	1	1	1	3	1	1	0	1	1	1	1	0	1	1	1	3.18	97	29.1	176
190	463159	0	2	51	0	1	0	0	0	0	0	0	0	0	0	0	0	0	0	0	0	0	0	0	0	0	0	0	0	1	0	0	2	3	1	0	0	0	0	0	0	0	0	0	0	3.51	104	31.3	89
191	468955	0	2	56	0	0	1	0	0	0	0	0	1	1	0	0	0	0	0	0	1	0	0	1	0	1	0	0	0	0	0	0	1	3	2	0	0	0	0	0	1	0	0	1	1	3.5	115	28.4	92
192	181954	0	1	52	0	0	0	0	0	1	0	0	0	0	0	0	0	0	0	1	0	0	0	0	0	0	0	0	0	1	0	0	1	3	1	0	1	0	1	0	1	0	0	0	1	5.21	149	44.5	142
193	425575	1	1	80	1	1	0	0	0	1	1	1	0	0	0	0	0	0	0	1	0	0	0	0	0	0	0	0	1	1	0	0	1	2	1	0	1	0	1	0	1	0	0	0	1	5.42	156	49.5	282
194	425594	0	2	52	0	0	0	0	0	1	0	0	0	0	0	0	1	0	0	0	0	0	0	1	0	0	0	0	1	0	1	1	4	1	2	0	1	1	0	0	1	1	0	0	1	2.44	73	21.6	7
195	426544	0	2	62	0	0	0	0	0	0	0	0	0	0	0	0	0	0	0	0	1	0	0	1	0	0	0	0	1	1	1	0	3	3	1	0	0	0	0	0	0	0	0	0	0	4.11	110	33.9	337
196	384004	0	1	52	0	0	0	0	0	0	0	0	0	0	0	0	0	0	0	0	1	0	0	1	0	0	0	0	0	1	1	0	2	3	1	0	0	0	0	0	0	0	0	0	0	3.88	120	34.7	292
197	438082	0	2	28	0	0	0	0	0	0	0	0	0	0	0	0	0	0	0	0	0	0	0	0	0	1	0	0	1	0	0	1	2	3	2	0	0	0	0	0	0	0	0	0	0	2.64	79	23.8	211
198	435415	0	1	43	0	0	0	0	0	0	0	0	0	0	0	0	0	0	0	0	0	0	0	0	0	0	0	0	1	0	1	0	4	2	1	0	0	0	0	0	0	0	0	0	0	4.6	146	42.7	214
199	213157	0	1	48	0	1	0	0	0	0	0	0	0	0	1	0	0	0	0	0	0	0	0	0	0	0	0	0	1	0	0	0	2	1	1	0	0	0	0	0	0	0	0	0	0	4.49	136	39.5	146
200	133503	1	2	89	1	0	0	0	0	0	0	0	0	0	0	0	0	0	0	1	0	0	0	0	0	0	1	0	1	0	1	0	2	2	2	1	0	1	1	1	1	0	0	1	1	4	110	36.9	189
201	445939	1	2	64	0	0	1	0	0	0	0	0	1	0	0	0	0	0	0	0	0	0	0	0	0	0	1	0	1	0	1	1	1	3	2	0	0	1	1	1	1	0	0	1	1	2.78	85	26.4	160
202	448630	1	1	86	1	1	0	0	0	1	0	0	0	0	0	0	0	0	0	0	0	0	0	0	0	0	1	0	1	1	0	1	1	3	1	1	1	1	1	1	0	0	0	1	1	2.57	79	24.2	191
203	449096	0	1	62	0	0	0	0	0	0	1	0	0	0	0	0	0	0	0	0	1	1	0	1	0	0	0	0	999	1	0	1	3	3	1	0	0	0	0	0	0	0	0	0	0	3.18	86	26.2	272
204	445089	0	1	75	1	1	0	0	0	1	1	0	0	0	1	0	0	0	0	0	0	0	0	0	0	0	0	0	1	1	1	0	1	3	1	0	0	0	0	0	0	0	0	0	0	4.5	154	43.7	163
205	453252	0	1	60	0	0	0	0	0	0	0	1	0	0	0	0	0	0	0	0	0	0	0	0	0	0	0	0	1	0	0	0	4	2	1	0	0	0	0	0	0	0	0	0	0	3.95	125	38.9	161
206	307310	1	1	81	1	1	0	0	0	0	0	1	0	0	0	0	0	0	0	0	1	0	0	1	0	0	0	0	1	0	0	0	4	3	2	1	0	1	1	1	0	0	0	1	1	4.48	164	54	214
207	460427	0	1	54	0	0	0	0	0	0	1	0	1	0	1	0	0	0	0	0	0	0	0	0	0	0	0	0	1	1	1	1	1	1	1	0	0	0	0	0	0	0	0	0	0	1.61	45	11.08	439
208	460966	1	1	80	1	1	1	0	0	0	0	0	1	0	0	0	0	0	0	0	0	0	0	0	0	0	0	0	1	1	1	0	3	3	1	0	0	0	0	0	0	0	0	0	0	4	119	37	66
209	458802	0	1	81	1	1	0	0	0	0	0	0	0	0	0	0	0	0	0	0	0	0	0	0	0	0	0	1	0	1	0	1	3	3	1	0	0	0	0	0	0	0	0	0	0	3.48	99	31	227
210	463960	1	1	51	0	1	0	0	0	0	0	0	0	0	0	0	0	0	0	0	0	0	0	0	1	1	0	0	1	1	1	1	2	3	1	0	0	0	0	1	0	0	0	0	1	3.07	92	28.4	122
211	474845	1	1	41	0	0	0	0	0	0	0	0	0	0	0	0	0	0	0	0	0	0	0	0	0	0	0	0	1	1	0	0	3	3	1	0	0	0	0	0	0	0	0	0	0	3.71	119	36.5	240
212	461376	1	1	71	1	1	0	0	0	0	0	0	0	0	0	0	0	0	0	0	0	0	0	0	0	0	0	0	1	0	0	0	2	3	1	1	0	0	0	0	1	0	0	0	1	3.61	118	24.9	128
213	470395	0	1	22	0	0	0	0	0	0	0	0	0	0	0	0	0	0	0	0	0	0	0	0	0	0	0	0	0	1	0	0	2	3	2	0	0	0	0	0	0	0	0	0	0	4.69	135	39.5	229
214		0	1	28	0	0	0	0	0	0	0	0	1	0	0	1	0	0	0	0	1	0	0	1	0	0	0	0	1	1	0	0	4	3	2	0	0	0	0	0	0	1	0	0	1	1.7	50	16.1	9
215	429055	0	1	80	1	1	0	0	0	0	1	1	0	0	1	0	0	0	0	0	0	0	0	0	0	0	0	0	0	1	0	0	2	3	1	0	0	0	0	0	0	1	0	0	1	5.84	151	47.6	57
216	446321	1	1	27	0	0	0	0	0	0	0	0	1	0	1	0	0	0	0	0	0	0	1	0	0	0	1	0	1	1	0	1	1	3	1	1	0	1	0	1	1	0	0	0	1	2.96	95	29.9	68
217	454487	1	1	50	0	0	0	0	0	0	0	0	0	0	0	0	0	0	0	0	0	0	0	0	0	0	0	0	0	1	0	0	1	3	1	1	0	1	0	1	1	0	0	1	1	5.42	183	54.1	138
218	459755	0	1	69	1	1	0	0	0	0	0	0	0	0	0	0	0	0	0	0	0	0	0	0	0	0	0	0	0	0	0	0	2	2	1	0	0	0	0	0	0	0	0	0	0	3.55	110	13.96	109
219	356531	0	1	61	0	0	0	0	0	0	0	0	0	0	0	0	0	0	0	0	0	0	0	0	0	0	0	0	0	1	0	0	3	3	1	1	0	0	0	0	0	0	0	0	0	4.4	144	43.7	180
220	124066	0	1	67	1	0	0	0	0	0	0	0	0	0	0	0	0	0	0	0	0	0	0	0	0	0	0	0	1	0	0	0	1	3	1	0	0	0	0	0	1	0	0	0	0	4.27	143	44.7	88
221	467341	0	1	72	1	1	0	0	0	0	0	0	1	0	0	0	0	0	0	0	0	0	0	0	0	0	1	0	1	1	1	0	2	3	1	0	0	0	0	0	1	1	0	0	1	3.34	104	30.7	26
222	472781	0	1	85	1	0	0	0	0	0	0	0	0	0	0	0	0	0	0	0	0	0	0	0	0	0	0	0	1	1	0	0	2	3	1	0	0	0	0	0	0	0	0	0	0	3.79	117	36.9	156
223	468849	0	2	41	0	0	0	0	0	0	0	0	0	0	0	0	0	0	0	0	1	1	0	1	0	0	0	0	0	1	0	1	3	3	1	0	0	0	0	0	0	0	0	0	0	2.98	91	24.6	327
224	460500	1	1	51	0	1	0	0	0	1	1	0	0	0	1	0	0	0	0	0	0	0	1	0	0	0	1	0	1	1	1	0	2	3	1	0	1	1	0	1	1	1	1	1	1	4.71	130	39.2	50
225	474219	0	1	63	0	1	0	0	0	0	1	0	0	0	1	0	0	0	0	0	0	0	0	0	0	0	0	1	0	1	0	1	2	3	1	0	0	0	0	0	0	0	0	0	0	2.95	90	28.1	230
226	474700	0	1	57	0	0	0	0	0	0	0	0	0	0	0	0	0	0	0	0	0	0	0	0	0	0	0	1	0	0	0	0	3	1	1	0	0	0	0	0	0	0	0	0	0	3.41	103	32.1	217
227	455459	0	1	29	0	0	0	0	0	0	0	0	0	0	0	0	0	0	0	0	0	0	0	0	0	0	0	0	1	1	1	0	1	1	1	0	0	0	0	0	0	0	0	0	0	5.39	165	49.7	239
228	459985	1	1	68	1	0	0	0	0	0	0	0	0	0	0	0	0	0	0	1	0	0	0	0	0	0	0	0	1	0	1	0	1	3	1	0	1	0	1	0	1	0	0	0	1	3.3	100	31.4	197
229	453718	1	2	30	0	1	0	0	0	0	0	0	1	0	0	0	0	0	0	0	0	0	0	0	0	1	0	0	1	0	1	1	1	3	2	1	0	1	1	1	1	1	1	1	1	2.31	70	21	4
230	461042	1	1	24	0	1	1	1	1	0	1	0	0	0	0	0	0	0	0	0	0	0	0	0	0	0	0	0	1	1	0	0	1	3	1	0	1	1	0	0	1	0	0	1	1	3.78	114	34.7	122
231	468075	1	1	45	0	0	0	0	0	0	0	0	1	0	0	0	0	0	0	0	0	0	0	0	0	0	0	0	1	1	0	0	2	3	1	0	0	0	0	0	1	0	0	0	1	5.18	164	47.8	165
232	463579	1	2	50	0	0	0	0	0	0	0	1	0	0	0	0	0	0	0	0	0	0	0	0	0	0	1	0	1	0	1	1	3	3	1	0	0	1	0	0	1	1	0	1	1	2.58	74	23	30
233	309944	1	1	91	1	0	0	0	0	0	0	0	0	0	0	0	0	0	0	1	0	0	0	0	0	0	1	0	1	1	1	1	1	3	1	1	0	1	1	1	0	0	0	1	1	5.15	93	30	249
234	422907	1	1	78	1	0	0	0	0	0	0	1	0	0	0	0	0	0	0	0	0	0	0	0	0	0	1	0	1	0	0	0	1	3	1	0	1	1	1	1	0	0	0	1	1	3.21	112	29.5	172
235	345136	1	2	52	0	0	0	0	0	0	0	0	0	0	0	0	0	0	0	0	1	1	0	1	0	0	0	0	1	1	0	1	3	3	1	0	0	0	0	0	0	0	0	0	0	2.8	82	25.3	308
236	444110	0	1	65	1	0	0	0	0	0	0	0	1	0	0	0	1	0	0	0	0	0	0	1	0	0	0	0	0	1	1	1	2	3	2	0	1	1	0	0	1	0	0	0	0	3.51	106	32.1	225
237	447557	0	2	59	0	0	0	0	0	0	0	0	0	0	0	0	0	0	0	0	0	0	0	0	0	0	0	0	0	0	0	0	2	1	1	0	0	0	0	0	1	0	0	0	0	3.53	104	31	167
238	462285	0	1	49	0	0	0	0	0	0	0	0	0	0	0	0	0	0	0	0	0	0	0	0	0	0	0	0	1	1	0	1	2	3	1	0	0	0	0	0	0	0	0	0	0	2.23	77	19.9	178
239	461170	1	1	72	1	0	0	0	0	0	0	0	0	0	0	0	0	0	0	0	0	0	0	0	0	0	0	0	1	0	1	1	3	3	1	1	0	1	0	0	0	0	0	0	0	2.09	62	18.9	61
240	459338	0	1	59	0	0	0	0	0	0	0	0	1	0	0	0	0	0	0	0	0	0	0	0	0	0	0	0	1	1	1	0	1	3	1	0	0	0	0	0	0	0	0	0	0	4.38	131	40.2	136
241	68009	0	2	57	0	0	1	0	0	0	0	0	0	0	0	0	0	0	0	0	0	0	0	0	0	0	0	0	0	1	0	0	3	3	1	0	0	0	0	0	0	0	0	0	0	3.96	119	37.8	176
242	453694	0	1	57	0	1	0	0	0	0	1	0	0	0	1	0	0	0	0	0	0	0	0	0	0	0	0	0	1	1	0	1	2	3	1	0	0	0	0	0	0	0	0	0	0	2.4	64	20.4	229
243	462579	0	1	58	0	0	0	0	0	0	0	0	0	0	0	0	0	0	0	0	0	0	0	0	0	0	0	0	1	0	1	0	2	3	1	0	0	0	0	0	1	0	0	0	1	3.51	106	31.1	87
244	468710	0	1	63	0	0	0	0	0	0	1	0	0	0	1	0	0	0	0	1	0	0	0	0	0	0	0	0	1	1	1	0	2	3	1	0	0	0	0	0	0	0	0	0	0	3.37	104	31.6	272
245	453520	1	1	75	1	0	0	0	0	0	0	0	0	0	1	0	0	0	0	0	0	0	0	0	0	0	1	0	0	0	1	0	1	1	1	0	0	1	1	1	0	1	0	0	1	3.51	112	8.66	42
246	453355	1	2	59	0	0	0	0	0	1	0	0	0	0	0	0	0	0	0	1	0	0	0	0	0	0	0	0	1	1	1	0	2	3	1	1	1	1	1	1	0	0	0	1	1	4.55	128	42.8	100
247	458618	1	1	59	0	0	0	0	0	0	1	1	0	0	0	0	0	0	0	0	0	0	0	0	0	1	0	0	0	0	0	0	1	3	1	1	1	1	1	1	1	0	0	1	1	3.7	116	34.2	116
248	474383	1	2	75	1	1	1	0	0	0	0	1	1	1	0	0	0	0	0	0	0	0	0	0	0	0	1	0	1	1	0	0	4	3	1	0	0	1	0	1	1	1	0	1	1	3.18	102	30.4	5
249	439299	0	1	47	0	0	0	0	0	0	0	0	0	0	0	0	0	0	0	0	0	0	0	0	0	1	0	0	0	1	0	0	4	2	1	0	0	0	0	0	0	0	0	0	0	5.22	149	50	144
250	431482	0	1	18	0	0	0	0	0	0	0	0	0	0	0	0	0	0	0	0	0	0	0	0	0	0	0	0	1	1	1	0	2	2	1	0	0	0	0	0	0	0	0	0	0	5.9	151	46.6	260
251	443515	0	1	70	1	0	0	0	0	0	0	0	0	0	0	0	0	0	0	0	0	0	0	0	0	0	0	0	1	0	0	0	2	2	1	0	0	0	0	0	1	0	0	0	0	4.98	146	44.7	105
252	422352	0	2	42	0	1	0	0	0	0	0	0	0	0	0	0	0	0	0	0	1	0	0	1	0	0	0	0	0	1	0	0	4	3	2	1	1	0	0	1	0	0	0	1	1	2.88	81	25.8	180
253	444912	0	1	57	0	0	1	0	0	1	0	0	0	0	0	0	0	0	0	0	0	0	0	0	0	0	0	1	0	0	0	0	1	3	1	0	1	0	0	0	0	0	0	0	1	3.95	127	38.7	125
254	446948	1	2	47	0	0	0	0	0	0	0	0	0	0	0	0	0	0	0	0	0	0	0	0	0	0	1	0	1	1	0	1	1	1	2	1	0	1	0	1	0	1	0	0	1	3.81	84	27.6	53
255	450241	0	1	28	0	0	0	0	0	0	0	0	0	0	0	0	0	0	0	0	0	0	0	0	0	0	0	0	0	1	0	0	2	3	1	0	0	0	0	0	0	0	0	0	0	4.01	121	36.2	313
256	453647	0	1	26	0	0	0	0	0	0	0	0	0	0	0	0	0	0	0	0	0	0	0	0	0	0	0	0	0	1	0	0	2	3	1	0	0	0	0	0	0	0	0	0	0	5.89	180	53.4	218
257	452261	0	1	50	0	1	1	0	0	0	0	0	1	0	0	0	0	0	0	0	0	0	0	0	0	0	0	1	0	1	1	1	1	2	1	0	0	0	0	0	0	0	0	0	0	2.32	77	23.6	151
258	88292	0	1	57	0	1	0	0	0	1	1	1	0	0	0	0	0	0	0	0	0	0	0	0	0	1	1	0	0	1	0	0	4	2	1	1	1	1	0	1	1	0	0	1	1	4.46	134	41.6	134
259	461377	1	2	72	1	0	0	0	0	0	0	0	0	0	0	0	0	0	0	0	0	0	0	0	0	0	0	0	0	0	0	1	2	3	1	0	0	0	0	0	0	0	0	0	0	3.23	97	29.2	160
260	460150	0	1	68	1	0	0	0	0	0	0	0	0	0	0	0	0	0	0	0	0	0	0	0	0	0	0	0	0	1	0	0	3	3	1	0	0	0	0	0	0	0	0	0	0	3.9	123	37.2	230
261	438748	0	1	53	0	0	0	0	0	0	0	0	0	0	0	0	0	0	0	0	0	0	0	0	0	0	0	0	0	1	0	0	2	3	2	1	0	0	0	0	0	0	0	1	1	3.7	114	33	163
262	473754	0	1	27	0	0	0	0	0	0	0	0	0	0	0	0	0	0	0	0	0	0	0	0	0	0	0	0	1	1	1	0	1	1	1	0	0	0	0	0	0	0	0	0	0	4.63	135	41.6	362
263	474628	0	2	45	0	0	0	0	0	0	0	1	0	0	0	0	0	0	0	0	0	0	0	0	0	1	0	0	0	0	0	0	1	3	2	1	0	1	1	1	1	0	0	1	1	2.64	80	24.5	60
264	474587	0	1	24	0	0	0	0	0	0	0	0	0	0	0	0	0	0	0	0	0	0	0	0	0	0	0	0	1	1	1	0	1	1	1	0	0	0	0	0	0	0	0	0	0	5.33	168	51	538
265	425461	1	2	74	1	0	1	0	0	0	0	0	0	0	0	0	0	0	0	0	0	0	0	0	0	0	0	0	0	0	1	1	1	2	1	1	0	0	0	0	0	0	0	0	0	2.61	80	24.1	177
266	140625	1	1	67	1	1	0	0	0	0	0	0	1	0	0	0	0	0	0	0	1	0	0	1	0	0	1	0	1	0	1	0	1	3	1	0	1	0	0	1	1	1	0	0	1	3.12	111	26.9	30
267	439297	0	2	61	0	1	0	0	0	0	0	0	0	0	0	0	0	0	0	0	1	0	0	1	0	0	1	0	0	1	0	1	1	3	1	0	0	0	0	0	0	0	0	0	0	3.3	87	27.8	271
268	430550	1	1	58	0	0	1	0	0	0	0	0	0	0	0	0	0	0	0	0	0	0	0	0	0	0	0	0	1	0	0	1	3	3	1	0	0	0	0	0	0	0	0	0	0	4.09	99	29.6	192
269	428759	1	1	79	1	0	0	0	0	0	0	0	0	0	0	0	0	0	0	0	0	0	0	0	0	0	1	0	0	0	1	1	1	3	1	0	0	1	0	0	0	0	0	0	0	3.46	97	29.9	64
270	363291	0	1	58	0	0	1	0	0	0	0	0	0	0	0	0	0	0	0	0	0	0	0	0	0	0	0	0	0	0	0	0	3	2	1	0	0	0	0	0	0	0	0	0	0	4.11	130	39.6	329
271	448785	0	1	75	1	1	0	0	0	1	0	0	0	0	0	0	0	0	0	0	0	0	0	0	0	0	0	0	1	0	1	0	2	3	1	1	1	0	0	0	0	1	0	0	0	3.76	119	33.5	37
272	436700	1	2	78	1	1	0	0	0	0	0	0	0	0	0	0	0	0	0	0	0	0	0	0	0	0	0	0	1	1	1	1	3	3	1	1	0	0	0	0	0	0	0	0	0	3.19	84	25	143
273	63891	0	1	79	1	1	1	0	0	0	0	1	0	0	0	0	0	0	0	0	0	0	0	0	0	0	0	0	0	0	0	1	4	1	2	1	0	0	0	0	1	0	0	0	1	3.21	71	25.1	378
274	463489	0	2	26	0	1	0	0	0	0	0	0	0	0	0	0	0	0	0	0	0	0	0	0	0	1	0	0	1	0	1	1	2	3	2	1	0	0	0	0	1	0	0	1	1	2.22	66	20.3	93
275	466644	1	1	53	0	0	0	0	0	0	0	0	0	0	0	0	0	0	0	0	0	0	0	0	0	0	0	0	1	0	0	0	2	3	2	0	0	0	0	0	1	0	0	0	1	4.04	132	33	129
276	462269	1	1	75	1	1	0	0	0	0	0	1	0	0	0	0	0	0	0	1	0	0	0	0	0	0	0	0	1	0	0	0	2	2	1	1	0	0	1	1	0	0	0	1	1	3.92	119	38.1	103
277	432746	1	1	70	1	0	1	1	0	0	1	0	0	0	0	0	0	0	0	1	0	0	0	0	0	0	1	0	0	0	1	1	1	3	1	1	0	1	1	1	0	0	0	1	1	4.02	79	28.9	143
278	457029	0	2	49	0	1	1	0	0	0	0	0	1	0	0	0	0	0	0	0	0	0	0	0	0	0	1	0	0	0	1	0	1	2	1	0	0	0	0	0	0	1	0	0	0	3.77	102	30.9	14
279	386818	1	1	91	1	1	0	0	0	0	1	0	0	0	0	0	0	0	0	0	0	0	0	0	0	0	0	0	999	1	0	0	2	3	1	0	0	0	1	1	0	0	0	0	1	3.67	117	35.2	138
280	453509	0	2	51	0	1	1	1	0	0	0	0	0	0	0	0	0	0	0	0	0	0	0	0	0	0	0	0	0	0	1	1	2	1	1	0	0	0	0	0	0	0	0	0	0	2.31	57	18.9	340
281	462224	1	1	39	0	0	1	0	0	0	0	0	1	0	0	0	0	0	0	0	0	0	0	0	0	0	1	0	1	0	1	1	1	3	2	1	0	1	1	1	1	0	1	1	1	2.54	80	25.1	113
282	416708	0	1	79	1	0	0	0	0	1	1	0	0	0	0	0	0	0	0	0	0	0	0	0	0	0	0	0	0	1	0	0	1	1	1	0	1	0	0	0	1	0	0	0	0	3.45	103	33.8	79
283	459096	0	2	70	1	1	1	0	0	0	1	1	0	0	0	0	0	0	0	0	0	0	0	0	0	0	0	0	0	1	0	0	2	2	2	0	1	0	0	0	0	0	0	0	0	3.62	78	24.7	107
284	469989	1	1	50	0	0	1	0	0	0	0	0	0	0	0	0	0	0	0	0	0	0	0	0	0	0	1	0	1	1	0	0	1	3	1	1	0	1	0	1	1	0	0	1	1	4.83	170	47.9	183
285	459048	1	1	74	1	1	0	0	1	1	0	1	0	0	0	0	0	0	0	0	0	0	0	0	0	0	0	0	0	1	0	0	3	3	1	0	1	0	0	0	0	0	0	0	0	3.72	109	33.8	334
286	425115	1	2	65	1	1	1	0	0	0	0	0	0	0	0	0	1	0	0	0	1	0	0	1	0	0	1	0	0	0	0	1	2	1	1	0	0	1	0	1	1	0	0	0	0	2.6	79	23.5	124
287	429613	0	1	59	0	0	0	0	0	0	0	0	0	0	0	0	0	0	0	0	0	0	1	0	0	0	0	0	1	0	0	0	2	3	1	1	0	0	0	0	0	1	1	0	1	1.91	129	38	23
288	437704	0	1	74	1	1	0	0	0	0	0	0	0	0	0	0	0	0	0	0	1	1	0	1	0	0	0	0	1	0	0	0	3	3	1	0	0	0	0	0	0	0	0	0	0	3.75	109	35.2	226
289	437926	0	1	60	0	0	0	0	0	0	0	0	0	0	0	1	0	0	0	0	0	0	0	1	0	0	0	0	1	0	0	1	2	2	2	1	0	1	0	0	0	1	1	1	1	2.85	79	24.4	22
290	432772	0	1	48	0	1	1	0	0	0	0	0	0	0	0	0	0	0	0	0	1	0	0	1	0	0	0	0	1	1	0	0	2	3	1	0	0	0	0	0	1	0	0	0	1	4.15	125	36.2	232
291	444370	0	1	22	0	0	0	0	0	0	0	0	1	0	0	0	0	0	0	0	0	0	0	0	0	0	0	0	1	1	1	0	1	2	1	0	0	0	0	0	0	0	0	0	0	4.59	133	40.2	237
292	432301	0	1	58	0	0	0	0	0	0	0	0	0	0	0	0	0	0	0	0	0	0	0	0	0	0	0	0	1	0	1	0	1	3	1	0	1	0	0	0	1	0	0	0	0	3.32	107	31.1	68
293	439431	0	1	29	0	0	0	0	0	0	0	0	0	0	0	0	0	0	0	0	0	0	0	0	0	0	0	0	0	1	0	0	2	1	1	0	0	0	0	0	0	0	0	0	0	5.06	135	42.1	184
294	394091	0	1	76	1	1	0	0	0	0	0	1	0	0	0	0	0	0	0	0	1	0	1	1	0	1	0	1	0	1	0	0	1	2	1	1	0	1	0	1	1	0	1	1	1	3.59	105	31.9	167
295	454816	0	2	58	0	1	1	1	0	1	1	0	0	0	0	0	0	0	0	0	0	0	0	0	0	0	0	1	1	1	1	1	2	3	1	1	1	0	0	0	0	0	0	0	1	2.08	60	18	199
296	447986	0	1	61	0	0	0	0	0	0	0	0	0	0	0	0	0	0	0	0	0	0	0	0	0	0	0	0	0	0	0	1	4	3	1	0	0	0	0	0	0	1	0	0	1	2.86	83	25.9	24
297	459530	0	1	41	0	0	0	0	0	0	0	0	0	0	0	0	0	0	0	0	0	0	0	0	0	1	0	0	1	0	1	1	2	1	1	0	0	0	0	0	0	0	0	0	0	3.13	92	28.6	289
298	457163	0	1	67	1	0	0	0	0	0	0	0	0	0	0	0	0	0	0	0	0	0	0	0	0	0	0	0	1	1	1	0	2	2	1	0	0	0	0	0	0	0	0	0	0	4.3	130	40.3	228
299	459484	1	2	27	0	0	0	0	0	0	0	1	0	0	0	0	0	0	0	0	0	0	0	0	0	0	0	0	1	0	1	1	2	3	2	0	1	1	1	1	1	0	0	1	1	3.36	98	31.2	78
300	455405	0	1	25	0	0	0	0	0	0	0	0	1	0	0	0	0	0	0	0	0	0	0	0	0	0	0	0	1	1	1	0	1	3	1	0	0	0	0	0	0	0	0	0	0	4.83	148	43.8	286
301	463594	1	1	18	0	0	0	0	0	0	0	0	0	0	0	0	0	0	0	0	0	0	0	0	0	0	0	0	0	0	1	1	2	3	1	0	0	0	0	0	1	1	0	0	1	3.16	86	21.7	58
302	469872	1	2	76	1	0	0	0	0	0	0	0	1	1	0	0	0	0	0	0	0	0	0	0	0	0	1	0	1	0	0	1	1	2	2	1	0	1	1	0	1	1	1	1	1	2.31	75	22.6	26
303	392087	0	2	74	1	0	0	0	0	0	0	0	1	1	0	0	0	0	0	0	0	0	0	0	0	0	0	0	0	1	0	1	1	3	1	0	0	0	0	0	0	1	0	0	0	3.62	100	30.3	50
304	475055	0	1	22	0	0	0	0	0	0	0	0	0	0	0	0	0	0	0	0	0	0	0	0	0	0	0	0	0	1	0	0	2	3	1	0	0	0	0	0	0	0	0	0	0	4.54	138	40.9	242
305	470570	0	2	33	0	0	0	0	0	0	0	0	0	0	0	0	0	0	0	0	0	0	0	0	0	0	0	0	1	1	0	1	2	3	1	0	0	0	0	0	0	0	0	0	0	3.36	87	26.3	329
306	430718	0	2	64	0	0	0	0	0	0	1	0	0	0	0	0	0	0	0	0	1	0	0	1	0	0	0	0	999	1	0	1	3	3	1	0	0	0	0	0	0	0	0	0	0	3.15	95	28.5	210
307	424667	0	2	46	0	0	0	0	0	0	0	0	0	0	0	0	0	0	0	0	1	0	0	1	0	1	0	0	1	1	1	1	1	3	2	0	0	0	0	0	0	0	0	0	0	3.01	86	26.2	296
308	442830	1	1	50	0	0	0	0	0	0	0	1	0	0	0	0	0	0	0	0	0	0	0	0	0	0	1	0	1	0	1	0	1	3	2	1	0	1	1	1	1	0	0	1	1	4.19	128	41.6	114
309	447247	1	2	62	0	0	1	0	0	0	0	0	0	0	0	0	0	0	0	0	0	0	0	0	0	0	0	0	0	0	0	0	2	2	1	0	0	1	1	1	1	0	0	1	1	3.71	115	35.4	174
310	118754	1	2	80	1	0	1	0	0	0	0	1	0	0	0	0	0	0	0	0	0	0	0	0	0	0	1	0	1	0	1	0	1	2	2	0	0	1	0	0	0	0	0	1	1	3.65	107	34.4	276
311	448377	0	1	19	0	0	0	0	0	0	0	0	0	0	0	0	0	0	0	0	0	0	0	0	0	0	0	0	1	1	1	0	1	1	1	0	0	0	0	0	0	0	0	0	0	4.91	154	45.3	292
312	448989	1	1	63	0	1	1	0	0	0	0	0	1	0	0	0	0	0	0	0	0	0	0	0	0	0	0	0	0	0	1	1	1	3	1	1	0	0	0	1	1	0	0	0	1	4.32	94	30	138
313	412517	0	2	51	0	0	0	0	0	0	0	0	0	0	0	0	0	0	0	0	1	1	0	1	0	0	0	0	1	1	1	0	3	3	1	1	0	0	0	0	0	0	0	0	0	5.36	140	42.9	436
314	449221	0	1	62	0	0	0	0	0	0	0	1	0	0	0	0	0	0	0	0	0	0	0	0	0	0	1	0	0	1	1	0	1	3	1	0	0	1	0	0	0	0	0	0	0	3.59	134	40.6	169
315	450758	0	2	72	1	1	0	0	0	0	0	0	0	0	0	0	0	0	0	0	0	0	0	0	0	0	0	0	1	0	0	0	1	3	1	0	0	0	0	0	0	0	0	0	0	3.36	102	30.7	198
316	448661	0	1	16	0	1	0	0	0	0	0	0	0	0	0	0	0	0	0	0	0	0	0	0	0	0	0	0	1	1	1	0	1	2	1	0	0	0	0	0	0	0	0	0	0	4.45	135	39.7	233
317	453407	0	1	62	0	0	1	0	0	0	0	0	0	0	0	0	0	0	0	0	0	0	0	0	0	0	0	0	1	1	0	0	1	3	1	0	0	0	0	0	0	0	1	0	1	4.28	131	39.5	167
318	461666	1	2	78	1	0	1	0	0	0	0	0	0	0	0	0	0	0	0	0	0	0	0	0	0	1	0	0	1	0	1	1	1	3	2	0	0	1	0	0	1	0	1	0	1	2.62	76	23.4	226
319	469577	1	1	82	1	1	1	0	0	0	0	1	0	0	0	0	0	0	0	0	0	0	0	0	0	0	1	0	0	1	1	0	1	3	1	1	1	1	0	1	0	1	0	1	1	3.2	106	31.9	33
320	466173	0	2	52	0	1	1	0	0	0	0	1	0	0	0	0	0	0	0	0	0	0	1	0	0	0	0	0	0	1	0	0	1	1	1	1	0	0	0	0	0	0	1	0	0	4.04	125	37.5	254
321	460116	0	1	57	0	0	0	0	0	0	0	0	1	0	1	0	0	0	0	0	0	0	0	0	0	0	0	0	1	1	1	0	2	3	1	0	0	0	0	0	1	0	0	0	1	4.42	137	39.7	195
322	378265	1	1	27	0	1	1	0	0	1	0	1	1	0	0	0	0	0	0	0	0	0	0	0	0	1	0	0	1	1	0	0	2	2	2	1	1	1	1	1	0	0	0	1	1	5.61	200	17.38	233
323	469309	0	1	21	0	0	0	0	0	0	0	0	0	0	0	0	0	0	0	0	0	0	0	0	0	0	0	0	1	1	1	0	1	2	1	0	0	0	0	0	0	0	0	0	0	4.67	157	40.9	438
324	450287	1	1	57	0	0	1	0	0	0	0	0	0	0	0	0	1	0	0	0	1	0	0	1	0	0	1	0	0	0	1	0	1	2	2	1	1	1	1	1	1	1	0	1	1	2.98	95	27.9	42
325	428774	1	1	26	0	0	0	0	0	0	0	0	0	0	0	0	0	0	0	0	0	0	0	0	0	0	0	0	1	1	0	0	2	3	1	0	0	0	0	0	1	0	0	0	1	4.04	119	33.7	235
326	425058	1	2	26	0	0	0	0	0	0	0	0	1	1	0	0	0	0	0	0	0	0	0	0	0	0	0	0	1	0	1	0	1	2	1	1	0	1	1	1	1	1	1	1	1	3.43	107	32.2	54
327	466376	0	2	86	1	1	0	0	0	1	0	0	1	0	0	0	0	0	0	0	0	0	0	0	0	0	0	0	1	1	1	0	4	3	1	1	1	1	0	0	0	0	0	0	0	3.49	111	34.2	96
328	449992	1	1	47	0	0	0	0	0	0	1	1	0	0	0	0	0	0	0	0	0	0	0	0	0	1	1	0	1	1	1	0	1	3	2	1	1	1	1	1	1	1	0	1	1	3.91	79	23.9	55
329	461849	1	1	49	0	0	0	0	0	0	0	0	1	0	0	0	0	0	0	0	0	0	0	0	0	1	0	0	0	0	1	1	1	3	1	1	0	0	0	1	1	0	1	0	1	2.98	89	26	70
330	133181	0	2	67	1	0	0	0	0	0	0	0	0	0	0	0	0	0	0	0	0	0	0	0	0	0	0	0	0	0	0	0	3	3	1	0	0	0	0	0	0	0	0	0	0	3.49	105	33	175
331	203682	0	1	74	1	0	0	0	0	0	0	0	0	0	0	0	0	0	0	0	0	0	1	0	0	0	0	0	0	1	0	0	4	2	1	0	0	0	0	0	0	0	0	0	0	4.69	166	50.9	227
332	383125	0	2	52	0	1	0	0	0	0	0	0	0	0	0	0	0	0	0	0	0	0	0	0	0	1	0	0	1	0	0	1	3	1	2	0	0	0	0	0	0	0	0	0	0	3.2	98	29.8	142
333	391301	0	1	50	0	0	0	0	0	0	0	0	0	0	0	0	0	0	0	0	0	0	0	0	0	0	0	0	0	1	0	0	3	2	1	0	0	0	0	0	0	0	0	0	0	4.76	153	45.4	267
334	423703	0	1	69	1	0	0	0	0	0	0	1	0	0	0	0	0	0	0	0	1	0	0	1	0	0	0	0	0	0	0	0	2	1	2	0	0	0	0	0	0	0	0	0	0	4.09	105	35.7	145
335	422973	0	1	45	0	1	1	0	0	0	0	0	1	0	0	0	0	0	0	0	0	0	0	0	0	1	0	0	0	1	0	0	4	1	2	0	0	0	0	0	0	0	0	0	0	3.7	114	33	163
336	430037	0	1	64	0	0	0	0	0	0	0	0	0	0	0	0	0	0	0	0	1	0	0	1	0	1	0	0	0	0	0	0	1	1	2	0	0	0	0	0	0	0	0	0	0	4.35	137	42.8	193
337	424829	0	1	45	0	0	0	0	0	0	0	0	0	0	0	0	0	0	0	0	0	0	0	0	0	1	0	0	0	1	0	0	3	3	1	0	0	0	0	0	0	0	0	0	0	4.8	141	42.6	129
338	449955	0	2	66	1	0	0	0	0	0	0	0	0	0	0	0	0	0	0	0	0	0	0	0	0	0	0	0	1	1	0	0	1	1	1	1	0	0	0	0	1	0	0	0	0	4.89	150	45.3	154
339	445627	0	2	57	0	0	0	0	0	0	0	0	0	0	0	0	0	0	0	0	1	0	0	1	0	1	0	0	0	0	0	1	1	3	2	0	0	0	0	0	0	0	0	0	0	3.37	93	28.9	521
340	449426	0	1	63	0	0	0	0	0	0	0	0	0	0	0	0	0	0	0	0	1	0	0	1	0	1	0	0	0	0	1	1	4	1	2	0	0	0	0	0	1	0	0	0	0	4.22	124	36.8	158
341	436827	0	2	30	0	0	0	0	0	0	0	0	0	0	0	0	0	0	0	0	0	0	0	0	0	0	0	0	0	0	0	0	1	1	1	0	0	0	0	0	0	0	0	0	0	4.65	162	41.2	162
342	439853	1	2	26	0	0	0	0	0	1	0	0	0	0	0	0	0	0	0	0	0	0	0	0	0	0	0	0	0	1	1	0	1	1	2	1	1	1	1	1	1	0	0	0	1	4.04	112	35.7	219
343	449920	0	2	67	1	0	0	0	0	0	0	0	1	1	0	0	0	0	0	0	0	0	0	0	0	0	0	0	1	1	1	1	1	1	2	1	0	0	0	0	0	0	0	0	0	2.73	82	26	79
344	449043	0	1	47	0	0	0	0	0	0	0	0	1	1	0	0	0	0	0	0	0	0	0	0	0	0	0	0	0	0	0	0	1	1	2	0	0	0	0	0	1	0	0	0	0	4.5	103	31.9	76
345	447509	0	1	60	0	0	0	0	0	0	0	0	0	0	0	0	0	0	0	0	0	0	1	0	0	1	1	0	0	1	0	0	1	3	1	1	0	1	0	1	1	0	1	0	1	4.15	134	41	211
346	432137	0	1	49	0	1	1	1	0	1	1	0	1	0	0	0	0	0	0	0	0	0	0	0	0	0	0	1	1	0	1	0	2	1	1	0	1	0	0	0	0	0	0	0	0	4.12	116	35.3	224
347	434047	0	1	69	1	0	0	0	0	0	0	0	0	0	0	0	0	0	0	0	0	0	1	0	0	0	0	0	0	1	0	0	1	2	1	0	0	0	0	0	0	0	1	0	0	5.04	136	44	170
348	442133	0	2	80	1	1	0	0	0	1	0	0	0	0	0	1	0	0	0	0	1	0	0	1	0	0	0	0	1	1	0	0	4	1	2	0	1	0	0	0	0	0	0	0	0	4.29	105	34.4	326
349	457139	0	1	64	0	0	0	0	0	1	0	1	0	0	0	0	0	0	0	0	0	0	0	0	0	0	0	0	0	1	0	0	2	1	2	0	1	0	0	0	0	0	0	0	0	3.73	114	33	163
350	462946	0	2	66	1	1	0	0	0	0	0	0	1	0	0	0	0	0	0	0	1	0	0	1	0	1	0	0	0	0	0	0	1	1	2	0	0	0	0	0	0	0	0	0	0	4.2	120	37.6	218
351	473993	0	2	25	0	0	0	0	0	0	0	0	0	0	1	0	0	0	0	0	0	0	0	0	0	0	0	0	0	0	0	0	4	1	2	0	0	0	0	0	0	0	0	0	0	3.53	104	31	167
352	457996	0	2	30	0	0	0	0	0	0	0	0	0	0	0	0	0	0	0	0	0	0	0	0	0	0	0	0	1	1	0	0	2	1	1	0	0	0	0	0	1	0	0	0	1	3.84	117	31.7	101
353	460269	1	2	68	1	1	1	0	0	0	0	1	0	0	0	0	0	0	0	0	0	0	0	0	0	1	0	0	0	0	0	0	1	2	2	0	0	0	0	0	0	0	0	1	0	3.01	89	27.9	167
354	458037	1	1	28	0	0	1	0	0	0	0	0	1	0	0	0	0	0	0	0	0	0	0	0	0	0	0	0	1	1	0	0	1	2	1	1	0	0	0	0	1	0	0	0	1	4.82	144	43.2	325
355	466187	0	1	77	1	0	0	0	0	0	0	0	0	0	0	0	0	0	0	0	1	0	0	1	0	1	0	0	0	0	0	0	1	1	2	0	0	0	0	0	0	0	0	0	0	3.94	123	38.2	228
356	455471	0	1	34	0	1	0	0	0	0	0	0	0	0	0	0	0	0	0	0	0	0	0	0	0	1	0	0	0	0	0	0	1	1	2	0	0	0	0	0	0	0	0	0	0	3.33	101	30.4	231
357	462458	0	1	44	0	0	1	0	0	0	0	0	1	0	0	0	0	0	0	0	0	0	0	0	0	1	0	0	0	1	0	0	1	1	1	1	0	0	0	0	1	0	0	0	0	4.75	147	42.9	157
358	457982	0	1	50	0	0	0	0	0	0	1	0	1	1	0	0	0	0	0	0	1	1	0	1	0	0	0	0	999	1	0	0	1	3	2	1	0	1	1	0	1	0	0	1	1	3.53	118	32.3	102
359	455913	0	1	51	0	1	0	0	0	0	0	0	0	0	0	0	0	0	0	0	1	0	1	1	0	1	0	0	999	0	0	0	1	1	2	0	0	0	0	0	0	0	0	0	0	4.7	135	41.6	204
360	470093	0	2	24	0	0	0	0	0	0	0	0	0	0	0	0	0	0	0	0	0	0	0	0	0	1	0	0	1	0	0	0	4	2	1	0	0	0	0	0	0	0	0	0	0	4.26	133	39.6	174
361	449369	0	2	35	0	0	0	0	0	0	0	0	0	0	0	0	0	0	0	0	1	1	0	1	0	0	0	0	0	1	0	1	2	3	2	1	0	1	1	1	1	0	0	1	1	3.36	94	31.7	163
362	168283	0	1	41	0	1	0	0	0	0	0	0	0	0	0	0	0	0	0	0	0	0	0	0	0	0	0	0	0	0	0	0	1	1	2	0	0	0	0	0	1	0	0	0	0	4.74	158	47	331
363	273438	0	1	45	0	0	1	0	0	0	0	0	1	0	0	0	0	0	0	0	0	0	0	0	0	1	0	0	0	0	0	0	1	1	2	0	0	0	0	0	0	0	0	0	0	4.56	124	38.2	311
364	286470	0	2	45	0	0	1	0	0	0	0	0	0	0	0	1	0	0	0	0	1	0	0	1	0	0	1	0	0	0	1	1	1	3	1	1	0	1	0	0	0	1	0	0	0	1.68	52	15.2	10
365	68885	1	2	73	1	1	0	0	0	0	0	0	0	0	0	0	0	0	0	1	0	0	0	0	0	0	0	0	0	0	0	0	4	1	2	1	0	0	1	1	0	0	0	0	0	3.84	117	35.9	198
366	350942	0	1	67	1	1	0	0	0	0	0	1	0	0	0	0	0	0	0	0	0	0	0	0	0	1	0	0	0	0	0	0	1	1	2	0	0	0	0	0	0	0	0	0	0	3.53	106	32.7	224
367	425546	0	1	18	0	0	0	0	0	0	0	0	0	0	0	0	0	0	0	0	0	0	0	0	0	0	0	0	0	0	0	0	1	1	1	0	0	0	0	0	0	0	0	0	0	5.25	162	46.8	216
368	446338	0	1	78	1	1	0	0	0	1	0	0	0	0	0	0	0	0	0	0	0	0	0	0	0	0	0	0	0	0	0	0	2	1	2	0	1	0	0	0	0	0	0	0	0	3.73	114	33	163
369	446342	0	2	50	0	0	0	0	0	0	0	0	0	0	0	0	0	0	0	0	1	0	0	1	0	1	0	0	0	0	0	1	1	1	2	0	0	0	0	0	0	0	0	0	0	3.92	111	34.6	255
370	437222	0	1	33	0	0	0	0	0	0	0	0	0	0	0	0	0	0	0	0	0	0	0	0	0	0	0	0	0	1	0	0	4	1	1	0	0	0	0	0	1	0	0	0	0	5.44	154	48.5	270
371	439511	0	1	72	1	1	0	0	0	1	0	0	0	0	0	0	0	0	0	0	0	0	0	0	0	0	0	0	0	0	0	0	2	2	2	0	1	0	0	0	0	0	0	0	0	3.73	114	33	163
372	436017	1	1	57	0	1	0	0	0	0	0	1	0	0	0	0	0	0	0	0	0	0	0	0	0	1	0	0	1	0	0	0	4	1	2	0	0	0	0	0	0	0	0	1	0	5.23	164	47.7	185
373	438070	0	2	47	0	0	0	0	0	0	0	0	0	0	0	0	0	0	0	0	0	0	0	0	0	0	0	1	1	1	1	1	3	3	1	1	0	0	0	0	0	0	0	0	0	3.99	95	28.5	170
374	449882	0	1	41	0	0	0	0	0	0	0	0	0	0	0	0	0	0	0	0	0	0	0	0	0	1	0	0	999	0	0	0	1	1	2	0	0	0	0	0	0	0	0	0	0	3.85	114	35.8	587
375	440250	0	2	47	0	0	0	0	0	0	0	0	1	0	0	0	0	0	0	0	1	0	0	1	0	1	0	0	0	0	0	0	2	1	2	0	0	0	0	0	0	0	0	0	0	3.6	97	30	533
376	435372	0	1	42	0	0	0	0	0	0	0	0	1	1	0	0	0	0	0	0	0	0	0	0	0	0	0	0	1	0	0	0	1	3	2	1	0	1	0	0	1	1	0	1	1	4.49	132	38	37
377	452389	0	1	51	0	1	0	0	0	0	0	0	0	0	0	0	0	0	0	0	0	0	0	0	0	0	0	0	0	1	0	0	2	1	2	1	0	0	0	0	0	0	0	0	0	4.61	148	45.1	173
378	440993	0	2	62	0	1	0	0	0	0	0	0	0	0	0	0	0	0	0	0	1	0	0	1	0	1	0	0	0	0	0	0	1	2	2	0	0	0	0	0	0	0	0	0	0	4.13	125	38.5	260
379	438747	0	1	26	0	0	0	0	0	0	0	0	0	0	0	0	0	0	0	0	0	0	1	0	0	0	0	0	0	0	0	1	1	3	2	0	0	0	0	0	0	0	1	0	0	1.95	62	19.1	191
380	435623	0	1	24	0	0	0	0	0	0	0	0	0	0	0	0	0	0	0	0	0	0	0	0	0	0	0	0	0	1	0	0	1	1	2	0	0	0	0	0	0	0	0	0	0	5.12	145	45	338
381	448309	0	2	47	0	0	0	0	0	0	0	0	0	0	0	0	0	0	0	0	0	0	0	0	0	1	0	0	0	0	0	0	1	1	2	0	0	0	0	0	0	0	0	0	0	2.61	80	24.2	119
382	441331	0	1	67	1	1	0	0	0	0	0	0	0	0	0	0	0	0	0	0	0	0	0	0	0	1	0	0	999	0	0	0	1	1	2	0	0	0	0	0	0	0	0	0	0	3.72	113	33.9	149
383	439999	0	1	39	0	0	0	0	0	0	0	0	0	0	0	0	0	0	0	0	0	0	0	0	0	0	0	0	1	1	0	0	1	2	2	1	0	0	0	0	1	1	0	0	1	6.19	174	51.4	43
384	451259	0	1	51	0	0	0	0	0	0	0	0	0	0	0	0	0	0	0	0	0	0	0	0	0	0	0	0	0	0	0	0	2	1	2	0	0	0	0	0	0	0	0	0	0	3.73	114	33	163
385	464673	0	1	63	0	0	0	0	0	0	0	0	0	0	0	0	0	0	0	0	0	0	0	0	0	1	0	0	0	1	0	0	1	1	2	0	0	0	0	0	1	0	0	0	0	4.59	149	44.9	240
386	465649	0	2	45	0	0	0	0	0	0	0	0	0	0	0	0	0	0	0	0	1	0	0	1	0	0	0	0	0	0	0	0	4	2	1	0	0	1	0	0	0	0	0	0	0	4.02	108	34.8	403
387	452769	0	1	46	0	0	0	0	0	0	0	0	1	1	0	0	0	0	0	0	0	0	0	0	0	0	0	0	0	0	1	0	1	2	1	0	0	1	0	0	1	1	0	0	1	3.22	109	32.8	47
388	465210	0	1	32	0	0	0	0	0	0	0	0	0	0	0	0	1	0	0	0	1	0	0	1	0	0	0	0	0	1	0	1	2	2	2	1	0	0	0	0	0	0	0	0	0	2.16	64	17.9	400
389	468195	0	1	53	0	0	0	0	0	0	0	1	0	0	0	0	0	0	0	0	0	0	0	0	0	1	0	0	0	0	0	0	1	2	2	0	0	0	0	0	0	0	0	1	0	4.44	130	40.3	167
390	455663	0	1	50	0	1	1	0	0	0	0	0	0	0	0	0	0	0	0	0	0	0	0	0	0	0	0	0	0	0	0	0	1	1	2	1	0	0	0	0	0	0	0	0	0	4.74	143	44	285
391	461307	0	1	43	0	0	0	0	0	0	0	0	0	0	0	0	0	0	0	0	0	0	0	0	0	0	0	0	0	0	0	0	2	1	2	0	0	0	0	0	0	0	0	0	0	3.92	135	34.4	146
392	463623	0	1	75	1	1	0	0	0	0	0	1	1	0	0	0	0	0	0	1	0	0	0	0	0	0	0	0	0	1	1	0	4	1	2	1	0	0	1	0	0	0	0	0	1	3.37	109	34	137
393	459435	1	1	21	0	0	0	0	0	0	0	0	0	0	0	0	0	0	0	0	0	0	0	0	0	0	0	0	0	0	0	1	1	1	2	0	0	0	0	0	1	0	0	0	0	3.18	90	28.4	491
394	466670	0	1	77	1	1	0	0	0	1	0	0	0	0	0	0	0	0	0	1	0	0	0	0	0	0	0	0	0	1	0	0	1	3	1	1	1	0	0	0	0	0	0	0	1	4.21	120	35.7	73
395	465073	0	1	79	1	0	0	0	0	0	0	0	0	0	0	0	0	0	0	0	0	0	0	0	0	0	0	0	0	0	0	0	1	1	2	0	0	0	0	0	0	0	0	0	0	4.02	135	37.3	132
396	458460	0	2	47	0	0	0	0	0	0	0	0	0	0	0	0	0	0	0	0	0	0	0	0	0	1	0	0	0	0	0	0	1	1	2	0	0	0	0	0	0	0	0	0	0	4.26	134	40.1	201
397	18029	0	1	83	1	1	1	1	0	1	0	0	0	0	0	0	0	0	0	0	0	0	0	0	0	0	0	0	0	0	0	0	1	2	1	0	1	0	0	0	0	0	0	0	0	5.16	159	49.3	149
398	153795	0	2	70	1	0	0	0	0	0	0	0	1	0	0	0	0	0	0	0	1	0	0	1	0	1	0	0	999	0	1	1	1	2	2	1	0	1	0	0	1	1	0	0	1	2.94	82	27.5	58
399	168740	0	1	81	1	1	1	1	0	1	1	0	1	0	0	0	0	0	0	1	0	0	0	0	0	0	0	1	1	1	0	0	2	3	2	0	1	0	0	0	0	0	0	0	0	3.53	103	33.7	181
400	221579	0	1	49	0	0	1	0	0	0	1	0	1	1	0	0	0	0	0	0	0	0	0	0	0	1	0	0	0	1	1	1	1	1	2	1	0	1	0	0	1	1	1	0	1	2.77	78	21.2	45
401	285654	0	1	67	1	1	0	0	0	0	0	0	0	0	0	0	0	0	0	0	0	0	0	0	0	0	0	0	1	1	0	0	3	3	1	1	0	0	0	0	0	0	0	0	0	4.06	126	37	306
402	314521	0	1	32	0	0	0	0	0	0	0	0	1	0	0	1	0	0	0	0	1	0	0	1	0	0	1	0	0	0	0	0	1	2	1	1	0	1	0	0	1	1	0	0	1	2.38	79	23.4	2
403	312377	0	2	44	0	1	0	0	0	0	0	0	0	0	0	0	0	0	0	0	1	0	0	1	0	0	0	0	0	0	0	0	2	1	2	0	0	0	0	0	0	0	0	0	0	3.53	104	31	167
404	324219	1	2	81	1	1	0	0	1	1	1	0	0	0	0	0	0	0	0	0	0	0	0	0	0	0	0	0	0	1	0	0	1	3	1	1	1	1	1	0	1	0	0	1	1	3.54	122	34.2	147
405	346220	0	1	56	0	0	1	0	0	0	0	0	1	1	0	0	0	0	0	0	1	1	0	1	0	1	0	0	0	0	0	0	1	1	2	0	0	0	0	0	0	0	0	0	0	3.95	136	36.2	133
406	414602	0	1	33	0	0	0	0	0	0	0	0	0	0	0	0	0	0	0	0	0	0	0	0	0	1	0	0	0	1	0	0	1	2	2	0	0	0	0	0	0	0	0	0	0	5.08	142	37.7	180
407	430575	0	1	47	0	1	0	0	0	1	0	0	0	0	0	0	0	0	0	0	0	0	0	0	0	0	0	0	0	1	0	0	4	2	1	0	1	0	0	0	0	0	0	0	0	6.15	166	53.8	223
408	413326	0	1	61	0	1	0	0	0	1	0	0	0	0	0	1	0	0	0	0	1	0	0	1	0	0	0	0	0	0	0	1	4	1	1	1	1	0	0	0	0	1	0	0	0	1.15	29	10.1	50
409	435953	1	2	46	0	0	0	0	0	0	0	0	0	0	0	0	0	0	0	0	0	0	0	0	0	0	1	0	1	1	1	0	1	2	1	1	0	1	0	1	1	0	0	1	1	4	123	36.6	198
410	437142	0	2	37	0	0	0	0	0	0	0	0	0	0	0	0	0	0	0	0	1	1	0	1	0	0	0	0	0	0	0	0	4	1	2	0	0	0	0	0	0	0	0	0	0	4.12	117	35.5	177
411	440826	0	2	56	0	1	0	0	0	0	0	0	0	0	0	0	0	0	0	0	1	0	0	1	0	0	0	0	0	0	0	0	2	1	1	0	0	0	0	0	0	0	0	0	0	4.39	137	41	169
412	441308	0	1	68	1	1	0	0	0	0	0	0	0	0	0	0	0	0	0	0	0	0	0	0	0	0	0	0	0	1	0	0	2	2	2	0	0	0	0	0	0	0	0	0	0	4.65	138	43	436
413	434438	0	1	88	1	0	0	0	0	0	1	0	0	0	0	0	0	0	0	0	0	0	0	0	0	1	0	0	0	0	0	0	1	1	2	0	0	0	0	0	0	0	0	0	0	2.41	64	20.1	137
414	450101	0	1	71	1	0	0	0	0	0	0	0	0	0	0	0	1	0	0	0	1	0	0	1	0	0	0	0	999	0	0	0	4	1	2	0	0	0	0	0	0	0	0	0	0	3.64	104	31.3	170
415	438643	0	2	40	0	0	0	0	0	0	0	0	0	0	0	0	0	0	0	0	0	0	0	0	0	0	0	0	0	0	0	0	4	1	2	0	0	0	0	0	0	0	0	0	0	4.47	124	40	273
416	451446	0	1	22	0	0	0	0	0	0	0	0	0	0	0	0	0	0	0	0	0	0	0	0	0	0	0	0	0	1	0	0	2	1	2	0	0	0	0	0	0	0	0	0	0	4.83	151	45	279
417	433569	0	1	49	0	0	0	0	0	0	0	0	1	0	0	0	0	0	0	0	1	1	0	1	0	0	0	0	0	0	0	1	4	1	2	0	0	0	0	0	1	0	0	0	0	2.08	55	17.6	243
418	445588	0	1	45	0	0	0	0	0	0	0	0	0	0	0	0	0	0	0	0	1	0	0	1	0	0	0	0	0	0	0	0	4	1	1	0	0	0	0	0	0	0	0	0	0	4.53	116	36.4	341
419	450507	0	2	33	0	0	0	0	0	0	0	0	1	0	0	0	0	0	0	0	0	0	0	0	0	1	0	0	0	1	0	0	1	3	1	0	0	0	0	0	0	0	0	0	0	4.47	131	39.8	181
420	435619	0	2	75	1	0	0	0	0	0	0	0	0	0	1	0	0	0	0	0	0	0	1	0	0	1	0	0	0	1	0	0	1	1	2	0	0	0	0	0	0	0	0	0	0	4.82	147	42.9	332
421	445808	0	1	46	0	0	0	0	0	0	0	0	0	0	0	0	0	0	0	0	1	1	0	1	0	0	0	0	0	0	0	0	2	1	2	0	0	0	0	0	0	0	0	0	0	4.14	117	36.3	286
422	442007	1	2	84	1	1	0	0	0	0	1	1	0	0	0	0	0	0	0	0	0	0	1	0	0	0	0	0	0	0	0	1	1	2	2	0	0	0	0	0	0	0	1	0	0	2.88	91	27.5	112
423	448575	0	2	65	1	1	0	0	0	0	0	0	0	0	0	0	0	0	0	0	1	0	0	1	0	0	0	0	0	1	0	1	2	1	2	0	0	0	0	0	0	0	0	0	0	4.03	99	26.7	214
424	453097	0	2	63	0	1	0	0	0	0	0	0	0	0	0	0	0	0	0	0	0	0	0	0	0	0	0	0	0	0	0	0	4	2	2	0	0	1	0	1	1	0	0	1	1	2.84	83	26.4	164
425	465699	0	2	65	1	0	0	0	0	0	0	0	0	0	0	0	0	0	0	0	0	0	0	0	0	1	0	0	0	0	0	0	1	1	2	0	0	0	0	0	0	0	0	0	0	2.94	92	28.4	202
426	470031	0	2	49	0	0	0	0	0	0	0	0	0	0	0	0	0	0	0	0	1	0	0	1	0	0	0	0	999	0	0	0	4	2	1	0	0	0	0	0	0	0	0	0	0	4.21	125	37.4	327
427	464668	0	2	40	0	0	0	0	0	0	0	0	0	0	0	0	0	0	0	0	0	0	0	0	0	1	0	0	0	0	0	0	1	1	2	1	0	0	0	0	0	0	0	0	0	4.31	127	39	202
428	461663	0	2	58	0	0	1	0	0	1	0	0	0	0	0	0	1	0	0	0	1	0	0	1	0	0	1	0	0	0	1	1	1	3	1	1	1	1	1	1	0	1	0	1	1	1.9	57	15	1
429	449582	0	1	28	0	0	0	0	0	0	0	0	0	0	0	0	0	0	0	0	0	0	0	0	0	1	0	0	0	0	0	0	1	1	2	0	0	0	0	0	0	0	0	1	0	4.11	137	40.7	195
430	456040	0	2	69	1	1	0	0	0	0	0	0	0	0	0	0	0	0	0	0	1	0	0	1	0	1	0	0	1	0	0	0	1	1	2	0	0	0	0	0	0	0	0	0	0	3.37	99	31.2	134
431	459968	0	1	26	0	1	1	0	0	0	0	0	1	0	0	0	0	0	0	0	0	0	0	0	0	0	0	0	0	1	0	0	4	3	2	0	0	0	0	0	0	0	0	0	0	3.73	114	33	163
432	462095	0	1	51	0	0	0	0	0	0	0	1	0	0	0	0	0	0	0	0	1	0	0	1	0	0	0	0	999	0	0	0	4	1	2	0	0	0	0	0	0	0	0	1	0	4.21	137	41.9	200
433	463600	0	1	66	1	0	0	0	0	0	0	0	1	1	0	0	0	0	0	0	0	0	1	0	0	0	0	0	0	0	1	0	1	1	2	0	0	0	0	0	1	1	0	0	1	2.28	86	22.2	48
434	455335	0	2	44	0	0	0	0	0	0	0	0	0	0	0	0	0	0	0	0	0	0	0	0	0	0	0	0	0	0	0	0	1	2	1	1	0	0	0	0	1	0	0	0	0	4.41	130	39.2	600
435	463989	1	2	38	0	0	0	0	0	0	0	0	0	0	0	0	0	0	0	0	0	0	0	0	0	0	0	0	0	0	0	0	2	3	2	0	0	0	0	0	0	0	0	1	0	4.11	113	33.6	305
436	463628	0	2	71	1	0	0	0	0	0	0	0	1	1	0	0	0	0	0	0	0	0	0	0	0	0	0	0	0	0	0	1	4	1	2	0	0	0	0	0	1	0	0	0	0	3.44	105	33.8	213
437	456943	0	2	63	0	0	1	0	0	0	0	0	0	0	0	0	0	0	0	0	1	0	0	1	0	1	0	0	0	0	0	1	1	1	2	0	0	0	0	0	0	0	0	0	0	2.47	73	23	232
438	474532	0	2	40	0	0	0	0	0	0	0	0	0	0	0	0	0	0	0	0	1	0	0	1	0	1	0	0	0	0	0	0	1	2	1	0	0	0	0	0	0	0	0	0	0	4.51	129	39.8	320
439	90682	0	1	45	0	1	1	1	0	0	1	1	1	0	0	0	0	0	0	0	0	0	0	0	0	0	0	0	1	1	0	0	1	3	1	1	0	0	0	0	0	0	0	0	0	5.76	182	51.2	295
440	101396	0	2	75	1	1	1	0	0	0	1	1	0	0	0	0	0	0	0	0	0	0	0	0	0	0	0	0	1	0	0	0	2	1	2	0	0	0	0	0	0	0	0	0	0	4.04	110	35.3	302
441	158263	0	1	42	0	1	1	1	0	0	1	0	1	0	0	0	0	0	0	0	0	0	0	0	0	0	0	1	1	0	0	0	2	2	1	0	0	0	0	0	0	0	0	0	0	4.46	136	40.5	119
442	222617	0	2	43	0	1	1	0	0	0	0	0	1	0	0	0	0	0	0	0	0	0	0	0	0	0	0	0	0	0	0	0	4	1	2	0	0	0	0	0	0	0	0	0	0	4.07	118	34.7	136
443	283919	0	1	43	0	0	1	1	0	0	1	0	0	0	0	0	0	0	0	0	0	0	0	0	0	0	0	0	0	1	0	0	4	1	1	0	0	0	0	0	0	0	0	0	0	4.13	115	34.5	240
444	299632	1	1	82	1	1	0	0	0	1	0	1	0	0	0	0	0	0	0	1	0	0	0	0	0	0	1	0	0	1	1	0	1	3	1	1	1	1	1	1	1	0	0	1	1	4.83	157	47.5	121
445	349681	0	1	49	0	0	1	0	0	0	0	0	1	0	0	0	0	0	0	0	1	1	0	1	0	0	0	0	0	0	0	0	1	2	2	0	0	1	0	1	0	0	0	1	0	2.66	98	27.7	70
446	405654	0	1	65	1	0	0	0	0	0	0	0	0	0	0	0	0	0	0	1	0	0	0	0	0	0	0	0	0	1	0	0	2	3	2	0	0	0	0	0	0	0	0	0	0	3.22	97	30.1	160
447	416157	0	2	44	0	0	0	0	0	0	0	0	0	0	0	0	0	0	0	0	1	1	0	1	0	0	0	0	999	1	0	0	2	1	2	1	0	0	0	0	0	0	0	0	0	4.18	128	41.2	376
448	424657	0	1	50	0	0	0	0	0	0	0	0	0	0	0	0	0	0	0	0	0	0	0	0	0	1	0	0	999	1	0	0	2	1	2	0	0	0	0	0	0	0	0	0	0	5.14	135	42	202
449	427339	0	1	51	0	0	0	0	0	0	0	0	0	0	0	0	0	0	0	1	0	0	0	0	0	0	0	0	999	1	0	0	1	2	1	1	1	0	1	1	0	0	0	1	1	7.75	193	69.5	241
450	430476	0	1	38	0	0	0	0	0	0	0	0	0	0	0	0	0	0	0	0	0	0	0	0	0	0	0	0	1	1	0	0	2	3	1	0	0	0	0	0	0	1	0	0	1	4.76	150	42	21
451	440224	0	1	72	1	1	0	0	0	0	0	0	0	0	0	0	0	0	0	0	1	0	0	1	0	1	0	0	0	0	0	0	1	1	2	0	0	0	0	0	0	0	0	0	0	3.99	120	36.7	309
452	438655	0	1	41	0	0	0	0	0	0	0	0	0	0	0	0	0	0	0	0	0	0	0	0	0	0	0	0	0	0	0	0	4	3	1	0	0	0	0	0	0	0	0	0	0	3.49	106	31.9	139
453	428775	1	1	51	0	0	0	0	0	0	0	0	0	0	0	0	0	0	0	0	0	0	0	0	0	0	0	0	1	0	0	0	2	1	2	0	0	1	0	0	1	0	0	1	1	3.51	111	32.6	93
454	431235	0	1	64	0	0	0	0	0	0	0	0	1	1	0	0	0	0	0	0	1	0	0	1	0	1	0	0	999	1	0	0	1	1	2	0	0	0	1	1	1	0	0	0	0	2.58	81	23.7	63
455	432727	1	1	52	0	1	0	0	0	0	0	1	0	0	0	0	0	0	0	0	0	0	0	0	0	0	0	0	0	0	0	0	1	1	1	0	0	0	0	0	0	0	0	1	0	4.89	147	45.1	220
456	447374	0	2	63	0	0	0	0	0	0	0	1	0	0	0	0	0	0	0	0	0	0	0	0	0	0	0	0	999	0	0	0	4	1	2	0	0	0	0	0	0	0	0	1	0	4.14	115	36.5	300
457	445802	0	2	74	1	0	1	0	0	0	0	0	0	0	0	0	0	0	0	0	1	1	0	1	0	0	0	0	0	0	0	1	4	1	2	0	0	0	1	0	1	0	0	0	1	2.91	85	24.8	229
458	448230	0	1	53	0	0	0	0	0	0	0	0	0	0	0	0	0	0	0	0	1	0	0	1	0	1	0	0	0	0	0	0	1	3	2	1	0	0	0	0	0	0	0	0	0	3.84	119	35.8	105
459	450666	0	1	59	0	0	0	0	0	0	0	0	0	0	0	0	0	0	0	0	1	0	0	1	0	1	0	0	0	0	0	0	4	1	2	0	0	0	0	0	0	0	0	0	0	4.06	119	38.3	299
460	446785	0	1	57	0	1	0	0	0	0	0	0	0	0	0	0	0	0	0	0	0	0	0	0	1	1	0	0	1	0	0	0	2	1	2	0	0	0	0	0	0	0	0	0	0	4.15	126	37.8	272
461	437378	0	1	60	0	0	0	0	0	0	0	0	0	0	0	0	0	0	0	0	0	0	0	0	0	1	0	0	0	0	0	0	1	3	2	1	0	0	0	0	1	0	0	0	1	4.52	145	42.2	453
462	441916	0	1	47	0	0	0	0	0	0	0	0	0	0	0	0	0	0	0	0	0	0	0	0	0	1	0	0	0	0	0	0	1	2	2	0	0	0	0	0	0	0	0	0	0	4.91	152	46.2	235
463	444786	0	1	49	0	0	1	0	0	0	0	0	1	1	0	0	0	0	0	0	1	0	0	1	0	1	0	0	0	0	0	0	1	2	2	0	0	0	0	0	1	0	1	0	1	3.52	122	37.4	93
464	432185	0	2	61	0	0	1	0	0	0	0	0	0	0	0	0	0	0	0	0	1	1	0	1	0	0	0	0	0	1	1	0	4	1	2	0	0	0	0	0	1	1	0	1	1	3.2	89	27.8	44
465	434160	0	1	21	0	0	0	0	0	0	0	0	1	0	0	1	0	0	0	0	1	0	0	1	0	0	0	0	0	0	0	0	2	2	2	0	0	0	0	0	0	0	0	0	0	2.64	79	24.1	98
466	466120	0	1	82	1	1	1	0	0	0	0	0	1	1	0	0	0	0	0	0	1	0	0	1	0	1	0	0	999	1	1	0	3	3	1	1	0	0	0	0	0	0	0	0	0	2.38	118	37.2	65
467	467596	1	1	65	1	0	1	0	0	0	0	0	1	0	0	0	0	0	0	0	1	1	0	1	0	0	0	0	0	1	0	0	1	2	1	1	0	0	0	0	0	0	0	0	0	3.48	108	33.7	224
468	451975	0	1	59	0	0	0	0	0	0	0	0	0	0	0	0	1	0	0	0	1	0	0	1	0	0	0	0	0	0	0	0	4	1	1	0	0	0	0	0	0	0	0	0	0	4.29	130	40.8	222
469	463217	1	1	47	0	0	0	0	0	0	0	0	0	0	0	0	0	0	0	0	0	0	0	0	0	0	1	0	0	1	0	1	1	3	1	0	0	1	0	0	1	1	0	0	1	1.9	75	18.4	45
470	465949	0	2	60	0	0	1	0	0	0	0	0	0	0	0	0	0	0	0	0	1	0	0	1	0	1	0	0	0	0	0	0	1	3	2	0	0	0	0	0	0	0	0	0	0	4.1	124	38	338
471	459051	1	2	65	1	1	0	0	0	1	1	0	0	0	0	0	0	0	0	0	0	0	0	0	0	0	0	0	0	0	0	0	2	3	2	1	1	0	1	0	0	0	0	0	1	3.69	113	35	222
472	455157	0	2	42	0	0	0	0	0	0	0	0	1	0	0	0	0	0	0	0	0	0	0	0	0	0	0	0	1	1	0	0	2	1	1	1	0	0	0	0	1	0	0	0	0	3.69	103	32.5	123
473	459453	1	2	86	1	0	0	0	0	0	0	0	0	0	0	0	0	1	0	0	0	0	0	0	0	0	0	0	0	0	1	1	2	2	2	1	0	0	1	0	0	0	0	1	1	2.53	72	22.9	109
474	459411	0	1	20	0	0	0	0	0	0	0	0	0	0	0	0	0	0	0	0	0	0	0	0	0	1	0	0	0	0	0	0	1	1	2	1	0	0	0	0	0	0	0	0	0	3.69	113	34.7	287
475	462945	0	2	27	0	0	0	0	0	0	0	0	0	0	0	0	0	0	0	0	0	0	0	0	0	1	0	0	0	1	0	1	1	1	2	0	0	0	0	0	0	0	0	0	0	3.09	88	25.3	147
476	456021	0	1	71	1	0	0	0	0	0	0	0	0	0	0	0	0	0	0	0	1	0	0	1	0	1	0	0	1	0	0	0	1	2	2	0	0	0	0	0	0	0	0	0	0	3.99	123	37.1	133
477	455334	1	2	52	0	1	0	0	0	0	0	1	0	0	0	0	0	0	0	0	0	0	0	0	0	0	0	0	0	0	0	0	4	2	1	0	0	0	0	0	0	0	0	1	0	3.53	120	35	167
478	32079	0	1	16	0	0	0	0	0	0	0	0	0	0	0	0	0	0	0	0	1	0	0	1	0	0	0	0	999	0	0	0	2	1	2	0	0	0	0	0	0	0	0	0	0	4.04	136	34.4	172
479	473588	1	1	80	1	1	0	0	0	0	0	1	0	0	0	0	0	0	0	0	0	0	0	0	0	1	0	0	0	1	0	0	1	3	2	1	0	1	0	1	1	0	1	1	1	4.85	148	46.3	147
480	454290	0	1	60	0	0	0	0	0	0	0	0	0	0	0	0	0	0	0	0	0	0	1	0	0	0	0	0	1	0	0	1	1	1	1	0	0	1	0	0	1	0	1	0	1	2.58	79	23.8	283
481	461229	1	2	80	1	1	0	0	0	0	0	1	0	0	0	0	0	0	0	0	1	0	0	1	0	1	0	0	0	0	0	0	1	1	2	0	0	0	0	0	0	0	0	0	0	3.31	98	31	186
482	470359	0	1	50	0	0	1	0	0	0	0	0	0	0	0	0	0	0	0	0	1	0	0	1	0	1	0	0	1	0	0	0	1	1	2	0	0	0	0	0	0	0	0	0	0	3.2	92	27.2	258
483	457633	0	2	72	1	0	0	0	0	0	0	0	1	1	0	0	0	0	0	0	0	0	0	0	0	1	0	0	0	0	1	1	1	1	2	1	0	0	0	0	0	0	0	0	0	2.37	83	21.8	167
484	460912	0	1	42	0	0	1	0	0	0	0	0	1	0	0	0	0	0	0	0	0	0	0	0	0	0	0	0	0	1	0	0	1	3	1	1	0	1	0	0	0	0	0	1	1	4.45	154	45.4	300
485	476610	0	2	64	0	1	0	0	0	1	0	0	0	0	0	0	0	0	0	0	0	0	0	0	0	0	0	0	0	1	0	0	2	1	1	0	1	0	0	0	1	0	0	0	0	4.66	140	43.1	228
486	60609	0	1	86	1	1	0	0	0	0	0	0	0	0	0	0	0	0	0	0	1	0	0	1	0	0	0	0	0	0	0	1	1	3	2	1	1	1	1	1	0	0	0	1	1	3.91	101	33.6	484
487	218770	0	2	70	1	0	1	0	0	0	0	0	0	0	0	0	0	0	0	0	0	0	0	0	0	0	0	0	0	1	0	0	1	2	1	1	0	0	0	0	0	0	0	0	0	4.25	140	43	213
488	385990	0	1	70	1	0	0	0	0	0	0	0	0	0	0	0	0	0	0	0	0	0	0	0	0	0	0	0	999	0	0	1	1	1	1	0	0	0	0	0	1	0	0	0	1	5.2	159	46.5	217
489	415680	0	2	72	1	0	0	0	0	0	0	0	0	0	0	0	0	0	0	0	1	1	0	1	0	0	0	0	0	0	0	0	2	1	2	0	0	0	0	0	0	0	0	0	0	4.44	127	40.9	273
490	428735	1	1	34	0	0	0	0	0	0	1	0	1	0	0	0	0	0	0	0	0	0	0	0	0	0	1	0	0	0	0	1	1	1	1	0	0	1	0	0	0	0	0	0	0	2.58	85	24.9	80
491	426098	0	1	71	1	0	0	0	0	0	0	0	1	1	0	0	0	0	0	0	1	0	0	1	0	1	0	0	0	0	0	1	1	1	2	0	0	0	0	0	1	0	0	0	0	3.12	91	26.7	269
492	429224	1	1	39	0	1	0	0	0	0	0	0	0	0	0	0	0	0	0	0	0	0	0	0	0	0	0	0	0	0	0	0	2	1	1	0	0	0	0	0	0	0	0	0	0	4.41	140	40.3	207
493	425958	0	1	43	0	0	0	0	0	0	0	0	0	0	0	0	0	0	0	0	0	0	0	0	0	0	0	0	999	1	0	0	3	3	1	0	0	0	0	0	0	0	0	0	0	4.64	132	39.8	195
494	435539	0	2	71	1	0	0	0	0	0	0	0	0	0	0	0	0	0	0	0	0	0	0	0	0	0	0	0	1	1	0	0	3	3	1	0	0	0	0	0	0	0	0	0	0	4.39	122	36.3	233
495	443342	0	2	21	0	0	0	0	0	0	0	0	0	0	0	0	0	0	0	0	1	0	0	1	0	0	0	0	0	0	0	0	4	3	1	0	0	0	0	0	0	0	0	0	0	5.02	135	43.2	353
496	444289	0	2	49	0	1	0	0	0	0	0	0	0	0	0	0	0	0	0	0	0	0	0	0	0	0	0	0	1	0	0	0	2	3	2	0	0	0	0	0	1	0	0	0	1	5.54	163	48.6	74
497	429723	0	1	53	0	0	0	0	0	0	0	0	1	0	0	0	0	0	0	0	0	0	1	0	0	0	0	0	0	1	0	1	4	3	1	0	0	1	0	0	0	0	0	0	0	4.1	86	26.2	455
498	442432	0	1	52	0	0	0	0	0	0	0	0	0	0	0	0	0	0	0	0	1	1	0	1	0	0	0	0	0	1	0	0	2	1	2	0	0	0	0	0	0	0	0	0	0	3.21	105	27.2	184
499	452514	0	2	59	0	0	0	0	0	0	0	0	0	0	0	0	0	0	0	0	1	0	0	1	0	1	0	0	0	1	0	0	1	3	2	0	0	1	0	0	0	0	0	0	0	4.37	117	35.4	142
500	439657	0	1	67	1	0	0	0	0	0	0	0	0	0	0	0	0	0	0	0	0	0	0	0	0	0	0	0	1	1	1	1	1	3	1	1	0	0	0	0	0	0	0	0	0	5.53	145	42.9	73
501	447643	0	1	56	0	0	0	0	0	0	0	0	0	0	0	0	0	0	0	0	0	0	0	0	0	0	0	0	1	1	0	0	2	3	1	1	0	1	0	1	1	0	0	1	1	5.22	167	52.6	211
502	444523	0	2	52	0	1	1	0	0	0	0	0	1	1	0	0	0	0	0	0	1	0	0	1	0	1	0	0	1	0	0	0	1	2	2	0	0	1	0	0	1	0	0	0	0	4.86	109	33.3	99
503	444823	0	1	67	1	1	1	0	0	0	0	0	0	0	0	0	0	0	0	0	1	0	0	1	0	1	0	0	0	0	0	0	1	1	2	0	0	0	0	0	1	0	0	0	0	4.73	141	42.5	167
504	437930	0	2	20	0	0	0	0	0	0	0	0	0	0	0	1	0	0	0	0	0	0	0	1	0	0	0	0	0	0	0	1	4	1	2	0	0	0	0	0	0	1	0	0	0	2.31	65	19.8	9
505	446372	1	2	43	0	0	0	0	0	1	0	0	0	0	0	0	0	0	0	0	0	0	0	0	0	0	0	1	1	1	1	1	1	2	2	0	1	1	0	1	1	0	0	1	1	3.75	90	29.3	403
506	450648	0	1	53	0	1	1	0	0	0	0	0	1	0	0	0	0	0	0	0	0	0	0	0	0	1	0	0	0	1	0	0	1	1	2	1	0	0	0	0	0	0	0	0	0	2.68	100	25.6	114
507	442080	0	2	44	0	0	0	0	0	0	0	0	0	0	0	0	0	0	0	0	1	0	0	1	0	0	0	0	1	0	0	1	4	2	1	0	0	0	0	0	0	0	0	0	0	3.5	93	30.7	396
508	433808	0	1	71	1	0	0	0	0	0	0	0	0	0	0	0	0	0	0	0	0	0	0	0	0	1	1	0	1	0	1	0	1	1	2	0	0	1	1	1	0	0	0	0	1	3.84	125	37.9	155
509	442472	1	1	70	1	1	1	0	0	0	0	1	0	0	0	0	0	0	0	1	1	0	0	1	0	0	0	0	1	1	0	0	1	3	1	1	1	0	1	1	0	0	0	0	1	5.64	171	53.2	168
510	442775	0	1	52	0	0	0	0	0	0	0	0	0	0	0	0	0	0	0	0	0	0	0	0	0	0	0	0	0	0	1	0	4	1	2	0	0	0	0	0	0	0	0	0	0	3.91	113	34.9	251
511	445221	0	1	23	0	0	0	0	0	0	0	0	1	1	0	0	0	0	0	0	1	1	0	1	0	0	0	0	0	1	0	1	3	3	1	0	0	0	0	0	0	0	0	0	0	2.86	84	25.9	196
512	454374	0	2	45	0	0	0	0	0	0	0	0	0	0	0	0	0	0	0	0	0	0	0	0	0	0	0	0	1	1	0	0	1	1	1	1	0	0	0	0	1	0	0	0	0	5.09	155	46.9	244
513	459864	0	2	56	0	0	0	0	0	0	0	0	0	0	0	0	0	0	0	0	1	1	0	1	0	0	0	0	0	0	0	0	2	1	2	0	0	0	0	0	0	0	0	0	0	4.24	102	33.9	776
514	456904	0	2	66	1	1	1	0	0	1	0	0	0	0	0	0	0	0	0	1	0	0	0	0	0	0	0	0	0	0	0	0	4	1	1	0	1	0	0	0	0	0	0	0	0	4.28	129	40.1	219
515	466304	0	1	68	1	0	0	0	0	0	0	0	0	0	0	0	0	0	0	0	1	0	0	1	0	1	0	0	0	0	0	0	1	1	2	0	0	0	0	0	0	0	0	0	0	4.12	124	36.9	197
516	455174	1	1	21	0	0	0	0	0	0	0	0	0	0	0	0	0	0	0	0	0	0	0	0	0	0	0	0	0	1	0	0	1	2	1	1	1	1	0	1	1	0	0	1	1	4.33	134	41.1	169
517	470054	0	1	48	0	0	0	0	0	0	0	0	1	1	0	0	0	0	0	0	0	0	0	0	0	0	0	0	0	1	0	1	1	2	2	1	0	0	0	0	0	0	0	0	0	3.01	79	24.6	225
518	475097	0	1	56	0	0	0	0	0	0	0	0	0	0	0	0	0	0	0	0	0	0	0	0	0	1	0	0	1	0	0	0	1	2	2	0	0	0	0	0	0	0	0	0	0	2.48	86	25.9	184
519	466727	1	2	61	0	0	0	0	0	0	0	0	0	0	0	0	0	0	0	0	0	0	0	0	0	0	1	1	1	1	1	1	1	2	1	0	0	1	0	0	0	0	0	0	0	2.95	91	29.2	122
520	470674	0	1	74	1	0	0	0	0	0	0	0	0	0	0	0	0	0	0	0	0	0	0	0	0	1	0	0	0	0	0	0	1	3	2	0	0	0	0	0	0	0	0	0	1	2.4	74	22.6	65
521	455102	0	2	45	0	0	0	0	0	0	0	0	0	0	0	0	0	0	0	0	0	0	0	0	0	0	0	0	0	0	0	0	2	3	2	0	0	0	0	0	0	0	0	0	0	4.46	129	40.9	255
522	462504	0	1	53	0	0	0	0	0	1	0	0	0	0	0	0	0	0	0	1	0	0	0	0	0	0	0	0	0	0	1	0	1	2	1	0	1	1	0	0	1	0	0	0	0	4.43	141	37.4	171
523	464171	0	2	61	0	0	1	0	0	0	0	0	0	0	0	0	0	0	0	0	0	0	0	0	0	1	0	0	0	0	0	0	1	1	2	0	0	0	0	0	0	0	0	0	0	3.54	118	36.1	176
524	454222	0	1	42	0	1	1	0	0	0	0	1	0	0	0	0	0	0	1	0	0	0	0	0	0	1	0	0	999	1	0	0	1	2	2	0	0	1	0	1	0	0	0	1	0	3.87	109	35.2	138
525	471429	0	2	45	0	0	0	0	0	0	0	0	0	0	0	0	0	0	0	0	0	0	0	0	0	1	0	0	0	0	0	0	1	3	2	0	0	0	0	0	1	0	0	0	0	3.87	120	36.4	212
526	42859	0	1	66	1	0	0	0	0	0	0	0	1	1	0	0	0	0	0	0	0	0	0	0	0	1	0	0	0	0	0	0	1	1	2	0	0	0	0	0	1	1	0	0	1	4.06	135	40.9	46
527	460641	0	2	63	0	1	0	0	0	0	1	1	0	0	0	0	0	0	0	0	0	0	0	0	0	1	0	0	1	0	0	0	2	3	2	0	0	0	0	0	1	0	0	1	1	3.26	104	28.4	144
528	454865	1	2	85	1	1	1	0	0	1	0	1	0	0	0	0	0	0	0	0	0	0	0	0	0	0	0	1	1	1	0	0	2	2	2	0	1	0	1	1	0	0	0	1	1	3.05	86	28.6	274
529	67457	0	2	86	1	1	1	0	0	1	0	0	0	0	0	0	0	0	0	0	0	0	0	0	0	1	0	0	1	0	0	0	1	2	2	0	1	1	0	0	0	0	0	1	0	3.11	75	23.3	162
530	258954	0	2	76	1	0	1	0	0	0	0	1	0	0	0	0	0	0	0	0	0	0	0	0	0	1	0	0	0	0	1	0	1	2	2	0	0	0	0	0	0	0	0	0	0	2.03	107	33.2	201
531	259100	1	2	70	1	1	0	0	0	0	0	0	0	0	0	0	0	0	0	0	1	0	0	1	0	1	0	0	0	0	0	0	1	1	2	1	0	1	1	1	0	0	0	0	1	4.08	74	22.5	192
532	293232	0	2	61	0	1	1	1	0	0	0	0	1	0	0	0	0	0	0	0	0	0	0	0	0	0	0	1	1	0	1	1	2	1	2	0	0	0	0	0	0	0	0	0	0	3.43	65	22.2	238
533	321855	0	1	45	0	0	1	0	0	1	0	0	1	1	0	0	0	0	0	0	0	0	0	0	0	0	0	0	0	1	1	0	1	3	2	1	1	1	1	0	1	1	0	1	1	3.84	86	26.5	57
534	322640	0	1	50	0	1	0	0	0	0	0	0	1	1	0	0	0	0	0	0	0	0	0	0	0	0	0	0	0	1	1	0	1	2	2	0	0	0	0	0	1	1	0	0	0	2.45	84	25.3	31
535	364779	0	2	34	0	0	0	0	0	0	0	0	1	0	0	0	0	0	0	0	0	0	0	0	0	0	0	0	0	0	0	0	4	2	2	0	0	0	0	0	1	0	0	0	0	4.25	125	38.7	251
536	378158	0	2	66	1	1	0	0	0	0	0	0	1	1	0	0	0	0	0	0	1	0	0	1	0	0	0	0	0	1	0	0	2	1	2	0	0	0	0	0	1	0	0	0	0	3.6	113	33.4	107
537	401121	1	2	52	0	0	1	0	0	0	0	0	1	1	0	0	0	0	0	0	0	0	0	0	0	0	0	0	0	0	0	1	2	2	2	0	0	0	0	0	0	1	0	0	0	3.01	82	25.8	26
538	426878	0	2	64	0	1	1	1	0	1	1	0	0	0	0	0	0	0	0	0	0	0	0	0	0	0	1	1	0	0	0	1	1	2	2	0	0	0	0	0	0	0	0	0	0	3.53	104	31	167
539	427275	0	2	60	0	0	0	0	0	0	0	0	1	1	0	0	0	0	0	0	0	0	0	0	0	0	0	0	0	0	0	0	1	3	2	0	0	0	0	0	1	0	0	0	0	3.53	104	31	167
540	414571	0	1	67	1	0	1	0	0	0	0	0	0	0	0	0	0	0	0	0	0	0	1	0	0	0	0	0	0	0	1	1	2	1	2	0	0	1	0	0	1	1	1	0	1	2.26	68	20.6	53
541	427059	0	1	71	1	0	1	0	0	0	0	0	1	0	0	0	0	0	0	0	1	1	0	1	0	0	0	0	1	0	1	0	1	1	1	1	0	1	0	0	1	0	0	0	1	3.52	102	31.2	71
542	425587	0	1	80	1	1	0	0	1	0	0	1	0	0	0	0	0	0	0	0	0	0	0	0	0	0	0	0	1	1	0	0	4	2	1	1	1	1	1	1	0	0	1	1	1	4.57	147	14.26	95
543	430235	0	2	44	0	0	0	0	0	0	0	0	1	0	0	0	0	0	0	0	1	0	0	1	0	1	0	0	0	0	0	0	1	1	2	0	0	0	0	0	0	0	0	0	0	4.1	122	36.5	323
544	444883	1	2	35	0	0	0	0	0	0	0	0	0	0	0	0	0	0	0	0	0	0	0	0	0	0	0	0	0	0	0	1	2	1	2	0	0	0	0	0	0	0	0	0	0	3.3	96	29.2	395
545	434449	0	2	65	1	1	1	0	0	0	0	1	0	0	0	0	0	0	0	0	0	0	0	0	0	1	0	0	0	0	0	0	1	1	2	0	0	0	0	0	0	0	0	0	0	2.77	83	25.6	117
546	431982	0	1	69	1	1	1	0	0	0	0	0	0	0	0	0	0	0	0	0	1	0	0	1	0	0	0	0	0	0	1	0	1	1	2	0	0	1	0	0	0	0	0	0	0	5.18	147	45.6	225
547	440415	0	2	61	0	0	1	0	0	0	0	0	1	1	0	0	0	0	0	0	0	0	0	0	0	1	0	0	0	0	0	1	1	1	2	0	0	0	0	0	0	0	0	0	0	3.23	92	28.5	525
548	444278	0	2	59	0	1	0	0	0	0	0	0	0	0	0	0	0	0	0	0	1	0	0	1	0	0	0	0	1	0	0	0	2	1	2	0	0	0	0	0	0	1	0	0	0	3.63	110	32.2	53
549	446406	0	1	53	0	0	0	0	0	0	0	0	0	0	0	0	0	0	0	0	0	0	0	0	0	0	0	0	0	0	0	1	4	2	2	0	0	1	0	0	0	0	0	0	0	3.16	82	26.4	396
550	438002	0	2	78	1	1	0	0	0	0	0	0	1	0	0	0	0	0	0	0	0	0	0	0	0	0	0	0	0	0	1	1	1	1	2	0	0	0	0	0	0	0	0	0	0	3.38	100	31.9	516
551	438084	0	1	45	0	0	0	0	0	0	0	0	0	0	0	0	0	0	0	0	0	0	0	0	0	0	0	0	0	0	0	1	2	1	2	0	0	0	0	0	0	0	0	0	0	3.33	90	28.7	545
552	447165	0	2	45	0	0	0	0	0	0	0	0	0	0	0	0	0	0	0	0	1	0	0	1	0	1	0	0	1	0	0	0	2	1	2	0	0	0	0	0	0	0	0	0	0	3.56	108	32.6	306
553	443785	0	2	64	0	1	1	0	0	0	0	0	1	1	0	0	0	0	0	0	0	0	0	0	0	0	0	0	0	0	1	0	1	1	2	0	0	0	0	0	1	0	1	0	0	2.68	74	24.4	112
554	451334	0	1	68	1	1	1	0	1	0	0	0	0	0	0	0	0	0	0	0	0	0	0	0	0	0	0	0	0	0	1	0	1	3	1	1	1	0	0	0	1	0	0	0	1	2.88	101	31.1	236
555	438233	1	1	53	0	1	1	0	0	0	0	0	0	0	0	0	0	0	0	1	0	0	0	0	0	0	0	0	1	1	0	0	2	2	1	0	0	0	1	1	0	0	0	1	1	4.9	109	38.2	109
556	445236	0	2	23	0	0	0	0	0	0	0	0	0	0	0	0	0	0	0	0	0	0	0	0	0	0	0	0	0	0	0	0	2	2	2	0	0	0	0	0	1	0	0	0	0	3.53	138	41.5	167
557	449352	1	2	52	0	1	0	0	0	0	0	1	0	0	0	0	0	0	0	0	0	0	0	0	0	0	0	0	0	0	0	0	2	1	2	0	0	0	0	0	0	0	0	1	0	3.94	118	36.4	230
558	454610	0	2	82	1	0	1	0	0	0	1	0	0	0	0	0	0	0	0	0	0	0	0	0	0	1	0	0	0	0	0	0	1	1	2	0	0	0	0	0	0	0	0	0	0	3.38	96	30.4	260
559	456209	0	1	47	0	0	0	0	0	0	0	0	0	0	0	0	0	0	0	0	1	1	0	1	0	1	0	0	0	0	0	1	1	2	2	1	0	0	0	0	1	0	0	0	0	3.23	71	24.7	248
560	442995	0	1	57	0	0	1	0	0	0	0	0	0	0	0	0	0	0	0	0	0	0	0	0	0	0	0	0	0	0	0	0	2	1	2	0	0	0	0	0	0	0	0	0	0	5.25	154	46.8	306
561	467057	1	2	59	0	1	1	0	1	0	0	0	0	0	0	0	0	0	0	0	0	0	0	0	0	0	0	0	0	0	0	0	2	1	2	0	1	1	0	0	0	0	0	0	0	3.53	119	37.1	167
562	475062	0	2	62	0	1	0	0	0	1	0	0	0	0	1	0	0	0	0	0	0	0	0	0	0	0	0	0	0	1	0	0	2	1	2	0	1	0	0	0	0	0	0	0	0	3.53	145	43.1	167
563	466691	0	1	68	1	0	0	0	0	1	0	0	0	0	0	0	0	0	0	0	0	0	0	0	0	0	0	0	0	1	0	0	1	2	1	0	1	1	0	0	1	0	0	1	1	4.94	161	48.2	206
564	474493	0	1	47	0	0	0	0	0	0	0	0	0	0	0	0	0	0	0	0	0	0	0	0	0	0	0	0	0	0	0	0	1	2	1	0	0	0	0	0	1	0	0	0	0	4.72	141	42.9	168
565	460020	1	2	42	0	0	0	0	0	0	0	1	0	0	0	0	0	0	0	0	0	0	0	0	0	0	1	0	1	1	1	0	2	3	1	1	0	1	1	1	1	1	0	1	1	2.73	90	28.2	14
566	470179	1	2	75	1	1	1	1	0	1	0	1	1	1	0	0	0	0	0	0	0	0	0	0	0	0	0	0	0	0	1	0	2	3	2	0	0	0	1	1	0	0	0	1	1	4.35	124	36	225
567	468397	1	1	52	0	0	1	0	0	0	0	0	1	1	0	0	0	0	0	0	1	0	0	1	0	1	0	0	0	0	0	0	1	2	2	0	0	1	1	1	1	0	0	0	1	2.09	67	18.8	109
568	462574	0	1	55	0	0	0	0	0	0	0	0	0	0	0	0	0	0	0	0	1	1	0	1	0	0	0	0	0	0	1	1	4	1	1	0	0	0	0	0	0	0	0	0	0	2.7	80	22.5	376
569	471578	0	2	52	0	0	0	0	0	0	0	0	0	0	0	0	0	0	0	0	0	0	0	0	0	1	0	0	0	0	0	0	1	1	2	0	0	0	0	0	0	0	0	0	0	4.85	145	42.6	113
570	51985	1	1	87	1	1	0	0	1	0	0	0	0	0	0	0	0	0	0	0	0	0	0	0	0	0	0	1	0	0	0	1	2	1	2	0	1	0	0	0	0	0	0	0	0	2.87	99	31	113
571	254640	0	1	69	1	1	0	0	0	0	0	0	0	0	0	0	0	0	0	1	0	0	0	0	0	0	0	0	1	0	0	0	1	1	1	0	1	0	1	0	0	0	0	0	1	3.73	113	36.3	179
572	137251	1	1	80	1	1	1	0	0	1	1	0	0	0	0	0	0	0	0	1	0	0	0	0	0	0	0	0	1	0	0	0	2	1	1	0	1	1	1	1	0	0	1	1	1	3.61	106	32.8	316
573	285947	0	2	68	1	1	0	0	0	0	0	0	0	0	0	0	0	0	0	0	0	0	0	0	0	0	0	0	0	0	0	0	2	1	2	0	1	0	0	0	0	0	0	0	0	4.02	123	37.4	274
574	346294	0	2	83	1	1	0	0	0	1	0	1	0	0	0	0	0	0	0	0	0	0	0	0	0	0	1	0	1	1	0	0	1	1	2	1	1	1	1	1	1	0	0	1	1	3.26	83	26.4	158
575	348869	1	1	74	1	0	0	0	0	0	0	0	1	1	0	0	0	0	0	0	0	0	0	0	0	1	0	0	0	0	1	1	1	2	2	0	0	0	0	0	1	1	1	0	0	2.35	76	19.3	30
576	403111	0	2	31	0	0	0	0	0	0	0	0	0	0	0	0	0	0	0	0	0	0	0	0	0	0	0	0	0	0	0	0	2	3	1	0	0	0	0	0	0	0	0	0	0	5.13	149	46.9	233
577	428873	0	1	47	0	0	0	0	0	0	0	0	0	0	0	0	0	0	0	0	0	0	0	0	0	0	0	0	0	0	0	0	1	1	1	0	1	0	0	0	0	0	0	0	0	4.95	146	43.5	637
578	429322	0	2	60	0	0	0	0	0	0	0	0	0	0	0	0	0	0	0	0	1	0	0	1	0	0	0	0	0	0	0	0	4	1	2	0	0	0	0	0	0	0	0	0	0	4.07	101	32.4	344
579	428853	0	2	58	0	1	1	1	0	0	1	0	0	0	0	0	0	0	0	0	0	0	0	0	0	0	0	0	0	0	0	0	4	2	1	1	0	0	0	0	0	0	0	0	0	3.79	115	36.4	357
580	444317	0	2	81	1	1	1	0	1	0	0	0	0	0	0	0	0	0	0	0	0	0	0	0	0	1	1	0	0	1	1	1	1	2	2	1	0	1	1	1	1	0	0	0	1	1.71	51	26.5	171
581	436359	0	2	70	1	1	0	0	0	0	1	0	0	0	1	0	0	0	0	0	0	0	0	0	0	0	0	1	0	1	1	1	2	2	1	1	0	0	0	0	0	0	0	0	0	2.99	83	27	632
582	431883	0	1	65	1	1	0	0	0	0	0	1	0	0	0	0	0	0	0	0	0	0	0	0	0	0	0	0	0	1	0	0	3	3	1	0	0	0	0	0	0	0	0	0	0	3.93	125	36.8	179
583	442339	0	2	56	0	0	0	0	0	0	0	0	1	1	0	0	0	0	0	0	1	0	0	1	0	1	0	0	1	0	0	0	1	1	2	0	0	0	0	0	1	0	0	0	0	3.92	112	36.3	382
584	448890	0	2	63	0	0	0	0	0	0	1	0	1	0	0	0	0	0	0	0	0	0	0	0	0	0	0	0	0	1	0	0	2	2	1	1	0	0	0	0	1	0	0	0	0	4.92	150	43.7	245
585	432179	0	1	16	0	0	0	0	0	0	0	0	0	0	0	0	0	0	0	0	0	0	0	0	0	0	1	0	1	0	0	0	1	2	1	0	0	1	0	0	0	0	0	0	0	4.89	143	41.4	87
586	441712	0	1	41	0	0	0	0	0	0	0	0	0	0	0	0	0	0	0	0	1	0	0	1	0	1	0	0	999	0	0	0	1	1	2	1	0	0	0	0	0	0	0	0	0	4.94	156	45.1	190
587	450768	0	2	86	1	1	0	0	0	0	0	1	0	0	0	0	0	1	0	0	0	0	0	0	0	1	0	0	0	0	0	0	1	2	2	1	0	0	0	0	0	0	0	0	0	3	88	30.8	151
588	435158	0	1	65	1	0	1	0	0	0	0	0	0	0	0	0	0	0	0	0	0	0	0	0	0	0	0	0	1	1	0	0	1	1	1	0	0	0	0	0	1	0	0	0	0	3.79	126	37	77
589	440274	0	1	45	0	0	0	0	0	0	0	0	0	0	0	0	0	0	0	0	0	0	0	0	0	1	0	0	0	0	0	0	1	2	2	0	0	0	0	0	0	0	0	0	0	5.1	147	43.1	144
590	431915	0	1	31	0	0	0	0	0	0	0	1	0	0	0	0	0	0	0	0	0	0	0	0	0	0	0	0	0	1	0	0	3	3	1	0	0	0	0	0	0	0	0	0	0	4.71	140	43.4	169
591	444388	1	1	77	1	0	0	0	0	0	0	0	0	0	0	0	0	0	0	1	0	0	0	0	0	0	1	0	0	0	0	0	1	2	1	0	0	1	1	0	0	0	0	0	1	3.99	118	36.3	309
592	443253	0	2	52	0	0	0	0	0	0	0	0	0	0	0	0	0	0	0	0	1	0	0	1	0	1	0	0	0	0	0	1	1	2	2	0	0	0	0	0	1	0	0	0	0	2.88	78	25.4	160
593	449752	0	1	15	0	0	0	0	0	0	0	0	0	0	0	0	0	0	0	0	0	0	0	0	0	0	0	0	1	1	0	0	2	2	1	0	0	0	0	0	0	1	0	0	0	3.91	139	40.7	45
594	442844	1	1	67	1	0	0	0	0	0	0	0	1	1	0	0	0	0	0	0	0	0	0	0	0	0	1	0	0	1	0	1	1	3	1	1	0	1	1	1	1	0	0	1	1	2.76	91	27.9	120
595	439110	0	2	53	0	0	1	0	0	0	0	0	1	0	0	0	0	0	0	0	0	0	0	0	0	1	0	0	0	0	0	0	1	1	2	0	0	0	0	0	0	0	0	0	0	4.36	132	39.5	166
596	446002	0	1	66	1	1	1	1	0	1	1	0	0	0	0	0	0	0	0	0	0	0	0	0	0	0	0	1	0	1	0	1	2	3	2	1	1	0	0	0	0	0	0	0	0	2.63	76	24.7	126
597	454410	0	2	49	0	0	0	0	0	0	1	1	0	0	0	0	0	0	0	0	0	0	0	0	0	1	0	0	1	0	0	1	1	1	2	0	0	0	0	0	0	0	0	0	1	2.35	65	20.6	169
598	466794	0	1	69	1	1	0	0	0	0	0	1	0	0	0	0	0	0	0	0	0	0	0	0	0	0	0	0	0	0	0	0	4	1	2	1	0	0	0	0	0	0	0	0	0	3.99	129	38.5	296
599	471435	0	1	71	1	1	1	0	0	0	0	0	1	0	0	0	0	0	0	0	1	0	0	1	0	1	0	0	0	0	0	0	1	1	2	1	0	1	0	0	0	0	0	0	0	4.08	128	38.7	238
600	451683	0	1	26	0	0	0	0	0	0	0	0	0	0	0	0	0	0	0	0	0	0	0	0	0	1	0	0	0	0	0	0	1	1	2	0	0	0	0	0	0	0	0	0	0	5.27	144	44.6	218
601	465428	0	2	45	0	0	0	0	0	0	0	0	0	0	0	0	0	0	0	0	1	0	0	1	0	1	0	0	0	0	0	0	1	2	2	0	0	0	0	0	0	0	0	0	0	3.94	118	36.5	256
602	455850	0	2	49	0	0	0	0	0	0	0	0	0	0	0	0	0	0	0	0	1	0	0	1	0	0	0	0	0	0	0	0	2	1	2	1	0	0	0	0	0	0	0	0	0	3.57	115	30.4	447
603	468189	0	1	61	0	1	0	0	0	0	0	0	0	0	0	0	0	0	0	1	0	0	0	0	0	0	0	0	0	0	1	0	1	2	1	0	0	1	0	0	0	0	0	0	0	3.89	121	36.8	349
604	457110	0	1	72	1	1	1	0	0	0	0	1	0	0	0	0	0	0	0	0	0	0	0	0	0	0	0	0	0	1	0	1	2	1	2	1	0	0	0	0	0	0	0	0	0	2.34	72	22.6	387
605	453025	0	2	77	1	0	1	1	0	0	1	0	0	0	1	0	0	0	0	0	0	0	0	0	0	0	0	0	0	1	0	1	4	1	2	0	0	0	0	0	0	0	0	0	0	3.27	85	27.4	267
606	456354	0	2	17	0	0	0	0	0	0	0	0	0	0	0	0	0	0	0	0	1	0	0	1	0	0	0	0	0	1	0	0	4	3	1	1	0	0	0	0	0	0	0	0	0	3.77	112	36.5	328
607	459636	0	2	64	0	0	0	0	0	0	0	0	0	0	0	0	0	0	0	0	0	0	0	0	0	1	1	0	0	0	0	0	1	2	2	0	0	1	0	0	1	0	0	0	1	3.75	100	31	137
608	471410	0	1	55	0	1	1	0	0	0	0	1	0	0	0	0	0	0	0	0	0	0	0	0	0	0	0	0	999	1	1	0	4	2	1	1	0	0	0	0	1	0	0	1	1	4.19	121	37.7	249
609	472168	0	1	76	1	1	0	0	0	0	0	1	1	0	0	0	0	0	0	0	0	0	0	0	0	1	0	0	999	0	0	0	1	3	2	1	0	0	0	0	1	0	0	0	1	3.84	101	29	284
610	475567	0	1	66	1	1	1	0	0	1	0	0	0	0	0	0	0	0	0	1	0	0	0	0	0	0	0	0	1	1	1	0	1	2	1	1	1	0	1	0	1	0	0	1	1	4.47	18	43.7	174
611	56287	0	2	70	1	1	1	1	0	1	1	1	0	0	0	0	0	0	0	0	0	0	0	0	0	0	0	0	1	1	0	0	2	2	1	1	1	1	0	0	0	0	0	1	1	4.13	107	34.5	127
612	199117	0	1	45	0	0	0	0	0	0	0	0	1	0	0	0	0	0	0	0	0	0	0	0	0	1	0	0	0	0	0	0	1	1	2	0	0	0	0	0	0	0	0	0	0	4.82	145	45.2	217
613	198522	0	1	71	1	1	0	0	0	0	0	0	1	1	0	0	0	0	0	0	0	0	0	0	0	0	0	0	1	1	1	0	1	1	1	0	0	0	0	0	1	0	0	0	0	3.7	121	35.7	124
614	232373	0	1	84	1	1	1	1	0	1	1	1	1	0	0	0	0	0	0	0	0	0	0	0	0	0	0	1	0	1	0	0	2	1	2	0	1	0	0	0	0	0	0	0	0	4.23	135	41.1	149
615	280665	1	1	76	1	1	0	0	0	0	0	0	0	0	0	0	0	0	0	0	0	0	0	0	0	0	0	0	1	1	0	0	2	3	1	1	0	0	0	0	0	1	0	0	1	6	190	53.9	22
616	294927	0	1	52	0	1	1	0	0	0	0	0	1	1	0	0	0	0	0	0	0	0	0	0	0	1	0	0	0	0	0	0	1	1	2	0	0	0	0	0	1	1	1	0	1	3.37	103	30.3	53
617	320872	0	2	53	0	1	1	0	0	0	0	0	1	1	0	0	0	0	0	0	1	0	0	1	0	0	0	0	1	1	0	0	4	1	2	0	0	0	0	0	1	0	0	0	0	4.88	140	42.4	107
618	326718	1	2	74	1	1	1	0	0	1	0	0	0	0	0	0	0	0	0	0	0	0	0	0	0	0	0	0	0	1	0	1	1	1	2	0	1	1	0	0	1	0	1	0	1	2.13	60	19.3	169
619	427626	0	2	48	0	0	0	0	0	0	0	0	0	0	0	0	0	0	0	0	1	0	0	1	0	0	0	0	0	1	0	0	3	2	1	1	0	0	0	0	0	0	0	0	0	4.77	146	43.4	278
620	431289	0	2	75	1	1	1	0	0	0	0	0	0	0	0	0	0	0	0	0	0	0	0	0	0	0	0	0	1	1	1	0	1	2	1	0	0	0	0	0	0	0	0	1	0	3.55	110	32.1	348
621	428593	0	1	64	0	0	0	0	0	0	0	0	1	1	0	0	0	0	0	0	0	0	0	0	0	0	0	0	1	1	0	0	1	3	1	1	0	0	0	0	1	0	0	0	1	4.98	163	46.6	100
622	427825	0	1	67	1	1	0	0	0	0	0	0	1	0	0	0	0	0	0	0	0	0	0	0	0	1	0	0	0	0	1	1	1	2	2	1	0	0	0	0	0	0	0	0	0	2.83	79	25.1	324
623	438692	0	1	60	0	0	0	0	0	0	0	0	0	0	0	0	0	0	0	0	1	0	0	1	0	1	0	0	999	0	0	0	1	1	2	0	0	0	0	0	1	0	0	1	1	2.97	93	28.1	77
624	434120	0	1	38	0	1	1	0	0	0	0	1	0	0	0	0	0	0	0	0	0	0	0	0	0	0	0	0	0	0	0	0	2	1	2	0	0	0	0	0	1	0	0	0	0	4.17	123	38.6	290
625	439726	0	2	71	1	1	1	0	0	0	0	0	0	0	0	0	0	0	0	0	1	0	0	1	0	0	0	0	0	0	0	1	1	1	1	0	0	0	0	0	0	0	0	0	0	3.32	99	31	606
626	451028	0	1	42	0	0	0	0	0	0	0	0	0	0	0	0	0	0	0	0	0	0	0	0	0	0	0	0	1	1	0	0	2	2	1	0	0	0	0	0	1	0	0	0	0	5.44	149	46.1	121
627	444600	0	1	41	0	0	0	0	0	0	0	0	1	0	0	0	0	0	0	0	0	0	0	0	0	0	0	0	1	1	1	1	1	1	1	1	0	1	0	0	0	0	0	0	0	3.2	99	31.4	325
628	441615	0	1	66	1	0	0	0	0	0	0	0	0	0	0	0	0	0	0	0	0	0	0	0	0	0	0	0	0	0	0	0	1	1	2	1	0	0	0	0	0	0	0	0	0	2.77	82	26.3	170
629	444263	0	1	65	1	0	0	0	0	0	0	0	1	1	0	0	0	0	0	0	0	0	0	0	0	1	0	1	0	1	1	0	1	2	2	1	0	0	0	0	0	0	0	0	0	4.73	135	41.5	284
630	439293	0	1	61	0	1	0	0	0	1	0	0	0	0	0	0	0	0	0	0	0	0	0	0	0	0	0	0	0	1	0	0	1	2	1	0	1	0	0	0	0	0	0	0	1	4.93	147	48.3	113
631	440414	0	1	80	1	0	0	0	0	0	0	0	1	0	0	0	0	0	0	0	0	0	0	0	0	0	0	0	0	0	0	1	4	1	2	0	0	0	0	0	1	0	0	0	0	3.39	82	24.5	216
632	446115	0	2	51	0	0	0	0	0	0	0	0	0	0	0	0	0	0	0	0	0	0	0	0	0	0	0	1	0	1	0	1	3	3	1	1	0	0	0	0	0	0	0	0	0	2.94	75	24.9	370
633	432097	0	2	52	0	1	0	0	0	1	0	0	0	0	0	0	0	0	0	0	0	0	0	0	0	0	0	0	0	1	0	0	1	1	2	0	1	0	0	0	0	0	0	0	0	5.49	155	50.2	184
634	439518	0	2	43	0	0	0	0	0	0	0	0	0	0	0	0	0	0	0	0	1	0	0	1	0	0	0	0	0	1	0	0	4	3	1	1	0	0	0	0	0	0	0	0	0	4.67	131	40.9	265
635	443958	0	2	48	0	0	0	0	0	0	0	0	0	0	0	0	0	0	0	0	0	0	0	0	0	1	0	0	0	1	0	0	1	1	2	0	0	0	0	0	0	0	0	0	0	4.1	121	37.7	217
636	447713	0	2	49	0	0	1	0	0	0	0	0	0	0	0	0	0	0	0	0	1	0	0	1	0	0	0	0	0	0	0	0	1	2	2	0	0	0	0	0	0	0	0	0	0	4.19	120	37.5	178
637	452924	0	2	65	1	1	0	0	0	0	0	0	0	0	0	0	0	0	0	0	1	1	0	1	0	0	0	0	0	0	0	1	4	2	2	1	0	0	0	0	0	0	0	0	0	3.22	76	26.1	223
638	449999	1	1	57	0	0	0	0	1	0	0	0	0	0	0	0	0	0	0	0	0	0	0	0	0	0	0	0	0	0	0	0	2	1	2	0	1	0	0	0	0	0	1	0	0	4.35	132	40.6	178
639	459513	0	2	51	0	0	0	0	0	0	0	0	1	0	0	0	0	0	0	0	0	0	0	0	0	0	0	0	0	1	0	1	2	1	2	0	0	0	0	0	1	0	0	0	0	3.09	104	32	165
640	467509	0	2	26	0	0	0	0	0	0	0	0	0	0	0	0	0	0	0	0	1	0	0	1	0	0	0	0	0	0	0	0	2	1	2	0	0	0	0	0	1	0	0	0	0	4.21	139	41.3	248
641	462022	0	1	73	1	0	0	0	0	0	0	0	0	0	0	0	0	0	0	0	0	0	1	0	0	0	0	0	0	0	0	0	1	1	2	0	0	0	0	0	0	0	0	0	0	4.15	141	36.6	288
642	463608	0	1	29	0	0	0	0	0	0	0	0	0	0	0	0	0	0	0	0	0	0	0	0	0	0	0	0	0	0	0	0	4	2	2	0	0	0	0	0	1	0	0	0	0	4.7	142	43.2	282
643	445355	1	1	55	0	0	0	0	0	0	0	0	1	1	0	0	0	0	0	0	0	0	0	0	0	0	1	0	0	1	1	0	1	1	1	1	0	0	1	0	1	0	0	1	1	3.73	113	34.8	145
644	445519	0	1	45	0	0	0	0	0	0	0	0	1	0	0	0	0	0	0	0	1	0	0	1	0	1	0	0	0	1	0	0	1	1	2	1	0	0	0	0	1	0	0	0	0	3.63	111	33.1	99
645	462057	0	1	51	0	0	0	0	0	0	0	1	0	0	0	0	0	0	0	0	0	0	0	0	0	0	0	0	0	0	0	0	4	1	2	0	0	0	0	0	0	0	0	0	0	3.05	104	27.4	322
646	463385	0	1	63	0	0	0	0	0	0	0	0	0	0	0	0	0	0	0	0	0	0	0	0	0	0	0	0	0	0	0	0	1	1	2	0	0	0	0	0	0	0	0	0	0	4.43	134	40.9	266
647	459491	0	1	81	1	0	1	0	0	0	0	0	0	0	0	0	0	0	0	0	1	0	0	1	0	1	0	0	0	0	1	1	1	1	2	0	0	0	0	0	0	0	0	0	0	3.65	95	29.7	152
648	463090	0	1	56	0	0	0	0	0	0	0	0	0	0	0	0	0	0	0	0	0	0	1	0	0	0	0	0	0	0	0	0	1	2	2	1	0	0	0	0	1	0	0	0	0	3.89	105	29	139
649	468083	0	2	52	0	1	0	0	0	0	0	1	0	0	0	0	0	0	0	0	0	0	0	0	0	0	0	1	1	1	0	0	2	1	2	0	0	0	0	0	0	0	0	0	0	3.45	113	34.7	168
650	379719	0	2	63	0	1	0	0	0	0	0	0	0	0	0	0	0	0	0	0	1	0	0	1	0	1	0	0	0	0	0	0	1	1	2	0	0	0	0	0	0	0	0	0	0	3.4	109	33.6	182
651	428245	1	1	75	1	1	0	0	0	0	0	0	0	0	0	1	0	0	0	0	1	0	1	1	0	0	0	0	1	1	0	1	4	3	1	1	0	1	1	1	1	0	1	1	1	2.1	68	22.9	611
652	447366	1	1	42	0	0	0	0	0	0	1	0	0	0	0	0	0	0	0	0	0	0	0	0	0	1	0	0	1	1	0	0	1	2	2	1	0	1	0	0	1	0	0	0	1	4.53	139	41	209
653	454020	0	1	50	0	0	0	0	0	0	0	1	0	0	0	0	0	0	0	0	0	0	0	0	0	0	0	0	1	0	0	1	2	1	2	0	0	0	0	0	0	0	0	1	0	3.73	106	33.5	518
654	433353	0	2	59	0	0	0	0	0	0	0	0	0	0	0	0	0	0	0	0	1	0	0	1	0	1	0	0	0	0	0	0	1	2	2	0	0	0	0	0	0	0	0	0	0	3.96	115	36.1	188
655	441189	0	1	52	0	1	1	0	0	0	0	0	1	1	0	0	0	0	0	0	0	0	0	0	0	0	0	0	0	0	0	0	4	1	2	0	0	0	0	0	1	0	0	0	0	4.44	128	38.5	217
656	432873	1	1	75	1	0	1	0	0	0	0	0	0	0	0	0	0	0	0	0	0	0	0	0	0	0	1	0	1	0	0	0	1	3	1	1	0	1	1	1	1	0	0	1	1	4.42	136	37.7	126
657	1177443	1	1	63	0	0	1	1	0	0	0	0	1	1	0	0	0	0	0	0	1	0	0	1	0	1	0	0	0	1	1	0	1	3	1	1	1	0	1	1	0	0	0	0	1	3.48	60	34.5	330
658	1118425	0	2	52	0	1	0	0	0	0	0	0	1	1	0	0	0	0	0	0	1	1	0	1	0	0	0	0	0	0	0	0	4	1	1	0	0	0	0	0	0	0	0	0	0	2.78	86	26	273
659	1216115	0	1	51	0	0	0	0	0	0	0	0	0	0	0	0	0	0	0	0	0	0	0	0	0	0	0	0	0	0	0	0	1	1	1	0	0	0	0	0	0	0	0	0	0	4.86	125	42	200
660	1218281	0	1	53	0	0	0	0	0	0	0	0	0	0	0	0	0	0	0	0	0	0	0	0	0	0	0	0	0	0	0	0	3	3	1	0	0	0	0	0	0	0	0	0	0	3.91	114	34.4	184
661	1217514	0	1	43	0	0	0	0	0	0	0	0	1	1	0	0	0	0	0	0	0	0	0	0	0	0	0	0	0	1	0	0	1	1	2	0	0	0	0	0	1	0	0	0	0	3.94	133	38.3	128
662	1216690	0	2	76	1	1	1	0	0	0	0	1	0	0	0	0	0	0	0	0	0	0	0	0	0	1	0	0	0	0	0	1	1	1	2	1	0	0	0	0	1	0	0	0	0	3.37	90	28.4	275
663	1216391	0	1	15	0	0	0	0	0	0	0	0	0	0	0	0	0	0	0	0	0	0	0	0	0	1	0	0	0	0	0	0	1	1	2	0	0	0	0	0	0	0	0	0	0	4.58	131	39.8	263
664	1211579	0	2	48	0	0	0	0	0	0	0	0	0	0	0	0	0	0	0	0	1	0	0	1	0	0	0	0	1	1	0	0	2	2	2	0	0	0	0	0	0	0	0	0	0	3.51	110	30.8	182
665	1195491	0	1	41	0	0	0	0	0	0	1	0	0	0	0	0	0	0	0	0	1	0	1	1	0	1	0	0	0	1	0	0	1	1	2	0	0	0	0	0	0	0	0	0	0	9.09	130	39.6	426
666	1208512	0	1	47	0	0	0	0	0	0	0	0	0	0	0	0	0	0	0	0	1	0	0	1	0	0	0	0	0	0	0	0	4	1	1	0	0	0	0	0	0	0	0	0	0	5.36	157	47.4	225
667	1198546	0	2	41	0	0	0	0	0	0	0	0	0	0	0	0	0	0	0	0	1	0	0	1	0	0	0	0	0	0	0	0	4	3	1	0	0	0	0	0	0	0	0	0	0	4.47	137	42.7	132
668	1208502	0	1	54	0	0	1	0	0	0	0	0	0	0	0	0	0	0	0	0	0	0	0	0	0	1	0	0	0	1	0	0	1	1	2	0	0	0	0	0	0	0	0	0	0	4.5	145	40.1	194
669	1162948	1	2	62	0	0	0	0	0	1	0	0	0	0	0	0	0	0	0	1	0	0	0	0	0	0	0	0	0	1	0	0	1	2	1	1	1	0	1	1	0	0	0	1	1	4.04	124	40.1	130
670	1124572	1	1	31	0	1	1	0	0	0	0	0	0	0	0	0	0	0	0	0	0	0	0	0	0	0	0	0	0	0	1	0	1	3	1	0	0	0	0	0	0	0	0	0	0	4.45	124	38.1	271
671	1203582	0	1	45	0	0	0	0	0	1	0	0	0	0	0	0	0	0	0	0	0	0	0	0	0	0	0	0	0	1	0	0	1	1	1	0	1	0	0	0	0	0	0	0	0	5.27	160	48.5	118
672	1015546	0	1	41	0	1	1	0	0	0	0	0	1	0	0	0	0	0	0	0	0	0	0	0	0	0	0	0	0	1	0	0	1	2	2	0	0	0	1	0	0	0	0	0	1	3.9	126	37.6	153
673	1197320	0	1	52	0	1	1	0	0	0	0	0	1	0	0	0	0	0	0	0	0	0	0	0	0	0	0	0	0	1	0	0	1	1	2	0	0	0	0	0	0	0	0	0	1	3.96	131	40.1	200
674	1196492	0	2	22	0	0	0	0	0	0	0	0	0	0	0	0	0	0	0	0	0	0	0	0	0	0	0	0	0	0	0	0	2	3	1	0	0	0	0	0	0	0	0	0	0	3.63	109	33.1	237
675	1154049	1	2	33	0	0	0	0	0	0	1	0	0	0	0	0	1	0	0	0	0	0	0	1	0	1	0	0	0	0	0	1	1	1	2	1	0	0	0	1	1	1	0	0	0	4.13	116	33.9	23
676	1192074	0	2	47	0	0	0	0	0	1	0	0	1	1	0	0	0	0	0	0	0	0	0	0	0	0	0	0	0	1	0	0	1	2	1	0	0	0	0	0	1	0	0	0	1	5.93	185	53.4	233
677	1179098	0	1	36	0	0	0	0	0	0	0	1	0	0	0	0	0	0	0	0	0	0	0	0	0	1	0	0	0	0	0	1	2	1	2	0	0	0	0	0	1	0	0	1	1	3.54	125	34.9	281
678	1189758	0	2	62	0	0	1	0	0	0	0	0	0	0	0	0	0	0	0	0	1	0	0	1	0	1	0	1	0	0	0	1	2	1	2	1	0	0	0	0	0	0	0	0	0	2.53	80	25.8	137
679	1186331	0	1	43	0	0	0	0	0	0	0	0	0	0	0	0	0	0	0	0	0	0	0	0	0	1	0	0	0	1	0	0	3	1	2	0	0	0	0	0	0	0	0	0	0	4.04	123	37.9	204
680	1189166	1	1	49	0	1	1	0	0	0	0	0	0	0	0	0	0	0	0	0	0	0	0	0	0	0	0	0	0	1	0	0	1	2	2	1	0	1	1	1	0	0	0	1	1	5.88	172	53.8	144
681	1181089	0	1	68	1	0	0	0	0	0	0	1	0	0	0	0	0	0	0	0	0	0	0	0	0	1	0	0	0	0	0	0	1	1	2	0	0	0	0	0	0	0	0	1	0	3.41	119	33	115
682	1180702	0	2	54	0	1	1	0	0	0	0	0	0	0	0	0	0	0	0	0	1	1	0	1	0	0	0	0	0	0	0	0	2	2	2	0	0	0	0	0	0	0	0	0	0	4.8	124	39.2	298
683	1184774	0	1	57	0	0	0	0	0	1	0	1	0	0	0	0	0	0	0	0	0	0	0	0	1	1	0	0	0	1	0	0	1	1	2	1	1	0	0	0	1	0	0	0	0	3.3	104	32.2	101
684	1186468	0	2	65	1	0	1	1	0	0	0	0	1	0	0	0	0	0	0	0	0	0	0	0	0	0	0	0	0	1	0	0	1	1	2	0	0	0	0	0	0	0	0	0	0	4.49	135	41.1	239
685	905317	0	1	64	0	1	1	0	0	0	0	1	0	0	0	0	0	0	0	0	0	0	0	0	0	0	0	0	0	1	0	0	1	1	2	0	0	0	0	0	0	0	0	1	0	5.31	161	48.8	165
686	1179892	0	1	65	1	1	1	0	0	0	1	0	0	0	0	0	0	0	0	0	0	0	0	0	0	0	0	0	0	0	0	0	1	1	2	0	0	0	1	0	0	0	0	0	0	4.21	126	38.1	120
687	1179859	1	2	49	0	1	0	0	0	0	0	0	0	0	0	0	0	0	0	0	0	0	0	0	0	1	0	0	0	0	0	0	1	1	2	0	0	0	0	0	0	0	0	0	0	4.16	124	38	182
688	1172702	1	1	21	0	0	0	0	0	0	0	0	1	0	0	0	0	0	0	0	1	0	0	1	0	1	1	0	0	0	0	0	2	1	2	0	0	0	0	0	0	0	0	1	0	3.89	110	33.9	230
689	1179784	0	1	60	0	1	0	0	0	0	0	0	0	0	0	0	0	0	0	0	1	0	0	1	0	1	0	0	0	0	0	0	1	2	2	0	0	0	0	0	0	0	0	0	0	4.64	138	42.3	224
690	1167179	0	2	60	0	0	0	0	0	0	0	0	0	0	0	0	0	0	0	0	1	1	0	1	0	0	0	0	0	1	0	1	2	1	2	0	0	0	0	0	0	0	0	0	0	2.72	80	24.8	412
691	1192907	1	2	67	1	1	0	0	0	0	0	0	0	0	0	0	0	0	0	0	0	0	0	0	0	1	0	0	0	0	0	0	1	1	2	1	0	0	0	0	0	0	0	0	0	4.24	124	39	99
692	1198467	0	1	73	1	1	0	0	0	0	0	1	0	0	0	0	0	0	0	0	0	0	0	0	0	1	0	0	0	0	0	0	2	1	2	0	0	0	0	0	0	0	0	0	0	4.76	150	44.4	103
693	1161484	0	2	39	0	0	0	0	0	0	0	0	0	0	0	0	0	0	0	0	1	0	0	1	0	1	0	0	0	0	0	0	1	2	2	1	0	1	1	1	0	0	0	1	1	4.88	141	44.6	287
694	903356	0	1	48	0	0	0	0	0	0	0	0	0	0	0	0	0	0	0	0	1	0	0	1	0	0	0	0	0	0	0	0	2	3	2	1	0	1	1	1	0	0	0	0	1	3.43	110	31.6	268
695	1199973	0	2	16	0	0	0	0	0	0	0	0	0	0	0	0	0	0	0	0	0	0	0	0	0	0	0	0	0	1	0	0	1	3	1	0	0	0	0	0	0	0	0	0	0	3.83	107	32.5	377
696	1204925	0	2	59	0	1	0	0	0	0	0	0	0	0	0	0	0	0	0	0	0	0	0	0	0	0	0	0	0	0	0	0	3	3	1	0	0	0	0	0	0	0	0	0	0	4.06	120	36.2	234
697	1204926	0	1	75	1	1	0	0	0	0	0	0	0	0	0	0	0	0	0	1	0	0	0	0	0	0	0	0	1	0	1	0	1	2	1	0	0	0	0	0	0	0	0	0	0	4.4	130	38.4	308
698	1202266	0	2	75	1	1	0	0	0	1	0	1	0	0	0	0	0	0	0	0	0	0	0	0	0	0	0	0	0	1	0	0	1	3	2	0	1	1	1	0	0	0	0	0	1	4.24	131	40.4	130
699	1205459	0	1	52	0	1	0	0	0	1	0	0	1	0	0	0	0	0	0	0	0	0	0	0	0	0	0	0	0	1	0	0	1	2	1	0	1	0	0	0	1	0	0	0	1	4.53	138	42.1	146
700	1210620	0	1	67	1	0	1	0	0	1	0	0	1	0	0	0	0	0	0	0	0	0	0	0	0	0	0	0	0	1	1	0	4	3	1	0	1	0	0	0	1	0	0	0	0	3.6	106	32.4	209
701	1214750	0	2	41	0	0	0	0	0	0	0	0	1	0	0	0	0	0	0	0	0	0	1	0	0	0	0	0	0	1	0	0	2	3	1	0	0	0	0	0	1	0	0	0	1	3.25	81	25.1	269
702	1168933	0	1	49	0	1	0	0	0	0	0	0	0	0	0	0	0	0	0	0	0	0	0	0	0	0	0	0	1	0	1	0	1	3	1	0	0	0	0	0	0	0	0	0	0	4.65	135	42.2	210
703	1181191	0	2	54	0	1	0	0	0	0	0	0	1	0	0	0	0	0	0	0	0	0	0	0	0	0	0	0	1	1	1	0	2	2	1	1	0	0	0	0	1	0	0	0	0	4.65	138	41.5	328
704	1183544	0	1	38	0	0	0	0	0	0	0	0	1	0	0	0	0	0	0	0	0	0	0	0	0	0	0	1	0	1	0	0	2	3	1	0	0	0	0	0	0	0	0	0	0	3.25	101	28.4	281
705	1203950	0	1	44	0	1	0	0	0	0	0	0	0	0	0	0	0	0	0	0	0	0	0	0	0	0	0	1	1	1	1	0	2	3	1	0	0	0	0	0	0	0	0	0	0	3.89	126	37	242
706	1196984	0	1	61	0	0	0	0	0	0	0	0	1	0	0	0	0	0	0	0	0	0	0	0	0	0	0	0	0	0	0	0	2	3	1	0	0	0	0	0	1	0	0	0	1	3.82	115	35.9	270
707	1195249	0	1	26	0	0	0	0	0	0	0	0	0	0	0	0	0	0	0	0	0	0	1	0	0	0	0	0	0	0	0	0	1	3	1	0	0	0	0	0	0	0	0	0	0	3.5	104	30.4	125
708	1194557	0	1	19	0	0	0	0	0	0	0	0	0	0	0	0	0	0	0	0	0	0	0	0	0	0	0	0	0	0	0	0	2	3	1	0	0	0	0	0	0	0	0	0	0	4.6	138	38.8	187
709	1194211	0	1	43	0	1	0	0	0	0	0	0	0	0	0	0	0	0	0	0	0	0	0	0	0	0	0	0	0	1	0	0	2	3	1	0	0	0	0	0	0	0	0	0	0	3.96	122	36	188
710	1191488	0	1	58	0	1	0	0	0	1	0	0	0	0	0	0	0	0	0	0	0	0	0	0	0	0	0	0	0	1	0	1	1	3	1	1	0	0	0	0	0	0	0	0	0	3.85	127	36.9	225
711	1196116	0	1	67	1	1	0	0	1	0	0	0	0	0	0	0	0	0	0	0	0	0	0	0	0	1	0	0	0	1	0	0	1	1	1	0	1	0	0	0	1	0	0	0	1	4.35	150	44.8	155
712	1168433	0	1	74	1	1	0	0	0	1	0	1	0	0	0	0	0	0	0	0	0	0	0	0	0	0	0	0	1	1	0	1	2	3	1	1	0	1	0	0	0	0	0	0	0	4.38	134	41.1	225
713	1189096	0	1	45	0	0	0	0	0	0	0	0	0	0	0	0	0	0	0	0	0	0	0	0	0	0	0	0	1	0	0	0	2	3	1	1	0	0	0	0	0	0	0	0	0	4.67	139	40.7	159
714	1185299	0	2	53	0	1	0	0	0	0	0	0	1	0	0	0	0	0	0	0	0	0	0	0	0	0	0	0	0	1	1	0	1	3	2	1	0	0	0	0	1	0	0	0	1	4.21	124	38	194
715	1184208	0	1	25	0	0	0	0	0	0	0	0	0	0	0	0	0	0	0	0	0	0	0	0	0	0	0	0	0	0	0	0	2	3	1	1	0	0	0	0	0	0	0	0	0	5.94	160	50.2	275
716	968222	0	2	62	0	1	0	0	0	1	0	0	0	0	0	0	0	0	0	0	0	0	0	0	0	1	0	0	0	1	0	0	1	3	1	1	1	1	0	0	0	0	0	0	1	3.33	101	31.3	191
717	1154302	1	2	22	0	0	0	0	0	0	0	0	0	0	0	0	0	0	0	0	0	0	0	0	0	1	0	0	0	0	1	1	1	1	1	0	0	1	1	1	0	0	0	0	0	3.3	100	30.5	113
718	1163488	0	2	66	1	1	0	0	0	0	0	0	0	0	0	0	0	0	0	0	1	0	0	1	0	1	0	0	0	0	0	0	1	1	2	0	0	0	0	0	0	0	0	0	0	3.77	111	34.8	206
719	1165325	0	1	33	0	0	0	0	0	0	0	0	1	0	0	0	0	0	0	0	0	0	0	0	0	0	0	0	1	1	1	0	1	2	1	0	0	0	0	0	1	0	0	0	1	4.43	149	43.7	162
720	1167130	1	1	70	1	1	0	0	0	0	0	1	0	0	0	0	0	0	0	0	0	0	0	0	0	0	0	0	0	0	0	0	1	1	2	0	0	0	1	1	0	0	0	1	1	4.19	128	36.1	169
721	1166229	1	1	69	1	1	0	0	0	0	0	0	0	0	0	0	0	0	0	0	1	0	0	1	0	0	0	0	0	1	1	0	4	1	1	0	0	0	0	0	0	0	0	0	0	4.17	128	39.4	215
722	1180080	0	1	69	1	1	0	0	0	0	0	0	0	0	0	0	0	0	0	0	1	0	0	1	0	1	0	0	0	0	0	0	1	1	2	0	0	0	0	0	0	0	0	0	0	3.54	104	31.6	170
723	1180177	0	2	43	0	0	0	0	0	0	0	0	0	0	0	0	0	0	0	0	1	0	0	1	0	1	0	0	0	1	0	0	1	1	2	0	0	0	0	0	0	0	0	1	0	4.18	118	36.9	406
724	1180567	0	1	49	0	1	0	0	0	1	0	1	0	0	0	0	0	0	0	0	0	0	0	0	0	1	0	0	0	1	0	0	2	3	2	1	1	0	0	0	0	0	0	0	1	4.25	123	31.7	240
725	1180575	0	1	66	1	0	1	1	0	0	0	0	0	0	0	0	0	0	0	0	0	0	0	0	0	0	0	0	0	1	1	0	1	3	1	1	0	0	0	0	0	0	0	0	0	4.65	143	41.6	68
726	1189912	0	1	29	0	0	0	0	0	0	0	0	0	0	0	0	0	0	0	0	0	0	0	0	0	0	0	0	1	0	0	1	2	2	1	0	0	0	0	0	1	0	0	0	1	1.9	62	18.5	222
727	1184224	0	1	61	0	1	1	0	0	0	0	0	1	0	0	0	0	0	0	0	0	0	0	0	0	0	0	0	0	0	1	0	1	2	2	1	0	0	0	0	0	0	0	0	0	1.83	61	18.7	306
728	1193728	0	1	54	0	0	0	0	0	0	1	0	0	0	1	0	0	0	0	0	0	0	0	0	0	0	0	0	0	1	0	1	2	3	1	1	0	0	0	0	1	0	1	0	1	2.13	64	19.9	269
729	1197379	0	2	54	0	0	0	0	0	0	1	0	0	0	1	0	0	0	0	0	0	0	0	0	0	0	0	0	0	1	0	1	2	3	1	0	0	0	0	0	0	0	0	0	0	2.6	73	21.7	150
730	1184464	0	1	62	0	1	1	1	0	1	0	0	0	0	0	0	0	0	0	0	0	0	0	0	0	0	0	0	0	1	0	1	2	3	1	0	1	0	0	0	0	0	0	0	0	2.7	76	24.9	306
731	1192527	0	2	22	0	0	0	0	0	0	0	0	0	0	0	0	1	0	0	0	0	0	0	1	0	0	1	0	0	1	0	0	2	1	2	0	0	1	0	0	0	0	0	0	0	2.64	83	25.6	143
732	1191671	1	2	35	0	0	0	0	0	0	0	0	1	1	1	0	0	0	0	0	0	0	0	0	0	0	0	0	0	1	0	1	2	1	2	0	0	0	1	1	0	0	0	0	1	3.41	84	26.9	80
733	1192844	0	1	57	0	0	0	0	0	0	0	0	1	0	0	0	0	0	0	0	0	0	0	0	0	0	0	0	0	0	0	0	4	3	1	0	0	0	0	0	1	0	0	0	1	3.15	93	28.3	131
734	1204008	0	2	29	0	0	0	0	0	0	0	0	0	0	0	0	0	0	0	0	1	0	0	1	0	0	0	0	999	0	1	0	3	3	1	0	0	0	0	1	0	0	0	1	1	2.51	87	21.1	116
735	1183100	0	2	62	0	0	0	0	0	0	0	0	1	0	0	0	0	0	0	0	1	0	0	1	0	1	0	0	0	0	0	1	1	3	2	1	0	0	0	0	0	0	0	0	0	3.02	91	27.6	130
736	1018978	0	1	72	1	0	0	0	0	0	0	0	0	0	0	0	0	0	0	0	0	0	0	0	0	0	0	0	0	0	0	0	3	3	1	0	0	0	0	0	0	0	0	0	0	3.2	98	31.5	164
737	1190917	0	1	65	1	1	1	0	0	0	0	0	0	0	0	0	0	0	0	0	0	0	0	0	0	1	0	0	0	1	0	0	3	3	1	1	0	0	0	0	0	0	0	0	0	3.29	94	28.9	122
738	1184271	0	2	61	0	0	0	0	0	0	0	0	1	1	0	0	0	0	0	0	0	0	0	0	0	0	0	0	0	1	0	0	1	1	2	0	0	0	0	0	0	0	0	0	0	3.26	106	32.9	80
739	999	0	1	43	0	0	0	0	0	0	0	0	1	1	0	0	0	0	0	0	1	1	0	1	0	1	1	0	0	0	1	0	2	1	2	0	0	0	0	0	0	0	0	0	0	4.56	134	42.5	112
740	1172300	0	1	80	1	1	0	0	1	0	0	0	0	0	0	0	0	0	0	0	0	0	0	0	0	0	0	0	0	0	0	1	1	2	2	0	1	0	1	1	0	0	0	1	1	2.75	86	28.1	239
741	1139663	0	1	40	0	0	0	0	0	0	0	0	0	0	0	1	0	0	0	0	0	0	0	1	0	1	0	0	0	1	0	0	2	3	1	0	0	0	0	0	1	1	0	0	1	2.14	72	22.2	5
742	925497	0	1	65	1	0	0	0	0	0	0	0	0	0	0	0	0	0	0	0	0	0	0	0	0	1	0	0	0	1	0	0	3	3	1	1	0	0	0	0	0	0	0	0	0	4.95	144	45.5	168
743	1194089	0	1	41	0	0	0	0	0	0	0	0	0	0	0	0	0	0	0	0	0	0	0	0	0	0	0	0	1	1	0	0	4	2	1	1	1	0	1	1	1	0	0	1	1	3.63	118	35.5	89
744	1188352	0	1	69	1	0	0	0	1	0	0	0	1	0	0	0	0	0	0	0	0	0	0	0	0	1	0	0	0	0	0	0	1	2	1	0	1	0	0	0	1	0	0	0	1	3.94	134	39.7	170
745	1189284	0	1	26	0	0	0	0	0	0	0	0	1	0	0	0	0	0	0	0	0	0	0	0	0	0	0	0	1	1	0	0	2	3	1	0	0	0	0	0	1	0	0	0	1	2.41	77	22.7	190
746	1191956	0	1	32	0	1	1	0	0	0	0	0	1	0	1	0	0	0	0	0	0	0	0	0	0	0	0	0	0	1	0	0	2	3	1	1	0	0	0	0	1	0	0	0	1	4.55	138	39.4	163
747	1193418	1	1	44	0	0	0	0	0	1	0	0	1	0	0	0	0	0	0	0	0	0	0	0	0	0	0	0	0	1	0	0	1	3	1	1	1	0	0	0	1	0	0	0	1	4.36	120	38.4	135
748	1156263	1	2	45	0	0	0	0	0	0	0	0	0	0	0	0	0	0	0	0	0	0	0	0	0	1	0	0	0	1	0	0	1	1	2	0	0	0	0	0	0	0	0	0	0	3.88	115	36.6	184
749	1189276	0	1	63	0	1	0	0	0	0	0	0	0	0	0	0	0	0	0	0	0	0	0	0	0	0	0	0	0	1	0	1	3	3	1	1	0	0	0	0	0	0	0	0	1	2.53	80	23.7	97
750	1178472	0	1	57	0	1	0	0	0	0	0	0	0	0	0	0	0	0	0	0	0	0	0	0	0	0	0	0	1	1	0	0	2	3	1	1	0	0	0	0	0	0	0	0	0	4.92	155	45.1	171
751	1032314	0	1	57	0	0	1	0	0	1	0	0	1	1	0	0	0	0	0	1	0	0	0	0	0	1	0	0	0	1	0	1	1	2	2	1	1	0	1	1	0	0	0	0	1	4.91	132	42.3	173
752	1186691	0	1	65	1	0	1	0	0	0	0	0	1	0	0	1	1	0	0	0	0	0	0	1	0	0	0	0	0	0	1	1	2	3	2	0	0	0	0	0	1	1	0	0	1	2.47	74	21.5	14
753	1209852	1	1	68	1	0	0	0	0	0	0	1	0	0	0	0	0	0	0	0	0	0	0	0	0	0	1	0	0	0	0	0	1	2	2	1	0	1	1	1	0	0	0	1	1	3.45	109	31.8	172
754	1191581	1	2	82	1	0	0	0	0	0	0	0	0	0	0	0	0	0	0	0	1	0	0	1	0	1	1	0	0	1	1	0	1	1	2	1	0	1	1	1	0	0	0	1	1	4.34	137	39.4	130
755	1187054	1	1	78	1	0	0	0	0	0	0	0	1	0	0	0	0	0	0	1	0	0	0	0	0	0	0	0	0	1	0	0	1	2	1	1	0	1	1	1	1	1	1	0	1	4.75	154	38.9	52
756	1178162	0	1	15	0	0	0	0	0	0	0	0	0	0	0	0	0	0	0	0	0	0	0	0	0	1	0	0	0	0	0	1	2	2	2	0	0	0	0	0	0	1	0	0	1	2.03	60	16.2	5
757	1193947	0	1	46	0	0	0	0	0	0	0	0	0	0	0	1	0	0	0	0	0	0	0	1	0	0	1	0	0	1	0	1	1	3	2	1	0	1	1	1	0	1	0	1	1	1.89	69	18.9	37
758	1182960	0	2	67	1	0	0	0	0	0	0	0	0	0	0	1	0	0	0	0	0	0	0	1	0	0	0	0	0	0	0	1	1	2	2	0	1	0	0	0	0	1	0	0	1	2.21	69	23.2	42
759	1181224	1	2	56	0	0	0	0	0	0	0	0	0	0	0	1	0	0	0	0	0	0	0	1	0	0	0	0	0	1	1	1	2	3	2	0	0	0	1	1	0	1	0	1	1	1.4	61	18.9	12
760	1181321	1	1	37	0	1	0	0	0	0	0	0	0	0	0	0	0	0	0	0	0	0	0	0	0	0	1	0	0	0	1	0	1	3	2	1	0	1	1	1	0	0	0	1	1	2.47	75	23.4	65
761	1120521	0	1	55	0	0	1	0	0	0	0	0	0	0	0	1	0	0	0	0	0	0	0	1	0	0	0	0	0	0	1	0	2	2	2	0	0	0	0	0	0	1	0	0	1	1.41	44	13.5	47
762	1181229	0	1	66	1	1	1	0	0	0	0	0	1	1	0	0	0	0	0	0	1	0	0	1	0	0	0	0	0	1	1	1	1	3	1	1	0	0	0	0	1	0	0	1	1	2.25	82	22.9	68
763	1197881	0	2	25	0	0	1	0	0	0	0	0	0	0	0	1	0	0	0	0	0	0	0	1	0	1	0	0	0	1	0	1	2	2	2	1	0	0	0	0	0	1	0	0	0	1.98	61	17.7	45
764	1180721	0	1	69	1	0	0	0	0	0	0	0	0	0	0	0	0	0	0	0	0	0	0	0	0	0	0	0	0	0	0	0	3	3	1	0	0	0	0	0	0	0	0	0	0	3.24	106	32.6	140
765	1213032	0	1	50	0	0	1	0	0	0	0	0	0	0	0	0	0	0	0	0	0	0	0	0	0	0	0	0	1	1	1	1	2	3	1	0	0	0	0	0	0	0	0	0	0	2.18	71	20.5	152
766	1204248	1	2	18	0	0	0	0	0	0	0	0	0	0	0	0	0	0	0	0	1	0	0	1	0	1	0	0	0	0	0	0	1	1	2	0	0	0	0	1	0	0	0	1	0	3.52	106	31.7	154
767	1191967	0	2	16	0	0	0	0	0	0	0	0	0	0	0	0	0	0	0	0	0	0	0	0	0	0	0	0	1	0	0	0	1	1	2	1	0	0	0	0	0	0	0	0	0	4.03	103	31.2	241
768	1203133	0	1	39	0	0	0	0	0	0	0	0	0	0	0	0	0	0	0	0	0	0	0	0	0	0	0	0	0	1	0	1	2	3	1	1	0	0	0	0	1	0	0	0	1	2.03	58	19	336
769	1174558	1	1	74	1	1	0	0	0	0	0	0	1	1	0	0	0	0	0	0	1	0	0	1	0	1	0	0	0	1	0	1	1	3	2	1	0	0	1	1	1	0	0	0	1	2.76	85	26.9	83
770	1208686	0	1	61	0	0	0	0	1	0	0	0	0	0	0	0	0	0	0	0	0	0	0	0	1	1	0	0	0	0	0	0	1	2	2	0	0	0	0	1	0	0	0	0	0	9	80	24.3	87
771	940362	0	1	64	0	1	1	0	0	1	0	0	1	0	0	0	0	0	0	1	0	0	0	0	0	0	0	1	0	1	0	0	1	1	1	1	1	0	0	0	1	0	0	0	1	5.19	149	47.8	143
772	1206744	0	1	59	0	0	0	0	0	0	0	0	0	0	0	0	0	0	0	0	0	0	0	0	0	0	0	0	0	0	0	0	2	2	2	0	0	0	0	0	0	0	0	0	0	4.34	119	34.8	324
773	1204214	0	1	51	0	1	0	0	0	0	0	1	0	0	0	0	0	0	0	0	0	0	0	0	0	1	0	0	0	0	0	0	1	1	2	0	0	0	0	0	1	0	0	1	1	3.34	105	31.7	182
774	1212202	1	1	78	1	0	0	0	0	0	0	0	0	0	0	0	0	0	0	0	0	0	1	0	0	0	1	0	999	0	1	0	1	3	1	0	0	1	0	0	0	0	0	0	0	4.59	141	43	280
775	1206886	0	1	53	0	0	0	0	0	0	0	0	1	0	0	0	0	0	0	0	0	0	0	0	0	0	0	0	0	1	0	0	2	3	1	0	0	0	0	0	0	0	0	0	0	4.65	141	42.7	224
776	1191217	1	1	61	0	0	0	0	0	0	0	0	1	1	0	0	0	0	0	0	1	0	0	1	0	1	0	0	0	0	0	1	1	2	2	1	0	1	0	1	1	1	0	0	1	3.2	99	30.6	49
777	1180073	0	2	63	0	1	0	0	0	0	0	1	0	0	0	0	0	0	0	0	0	0	0	0	0	0	0	0	0	0	0	0	1	1	2	0	0	0	0	0	0	0	0	1	0	3.3	95	30.7	63
778	1195350	0	2	71	1	1	0	0	0	0	0	0	0	0	0	0	0	0	0	0	0	0	0	0	0	0	0	1	0	1	0	1	2	3	1	1	0	0	0	0	0	0	0	0	0	4.04	78	24.8	227
779	874018	0	1	53	0	0	0	0	0	0	0	0	1	0	0	0	0	0	0	0	0	0	0	0	0	1	0	1	0	0	0	0	3	2	2	1	0	0	0	0	0	0	0	0	0	3.05	95	28.1	116
780	1184289	1	1	66	1	1	1	0	0	1	0	1	1	0	0	0	0	0	0	0	0	0	0	0	0	0	1	0	1	1	0	0	1	3	1	1	1	1	1	1	1	1	0	1	1	3.96	106	28.8	14
781	1213213	1	2	70	1	1	0	0	0	1	0	0	0	0	0	0	0	0	0	1	1	0	0	1	0	0	0	0	0	0	0	0	1	2	2	1	1	1	1	1	0	0	0	1	1	4.51	142	45.3	305
782	1177936	0	1	37	0	0	0	0	0	1	0	0	0	0	0	0	0	0	0	0	0	0	0	0	0	0	0	0	0	1	0	1	1	1	1	1	1	0	0	0	0	0	0	0	1	2.26	60	18.9	60
783	830958	0	2	47	0	1	1	0	0	0	0	0	1	1	0	0	0	0	0	0	1	1	0	1	0	0	0	0	0	1	0	1	3	3	1	1	0	0	0	0	0	0	0	0	1	2.26	60	18.9	60
784	1210759	0	1	68	1	0	0	0	0	0	0	0	1	0	0	0	0	0	0	0	1	0	0	1	0	1	0	0	0	0	1	0	1	2	2	1	0	0	0	0	0	0	0	0	0	4.17	100	32.2	397
785	1182350	0	1	41	0	0	0	0	0	0	0	0	0	0	0	0	0	0	0	0	0	0	0	0	0	1	0	0	0	1	0	0	1	1	2	0	0	0	0	0	0	0	0	0	0	5.19	159	44.7	162
786	1204159	0	1	75	1	1	0	0	0	0	0	0	0	0	0	0	0	0	0	0	0	0	0	0	0	0	1	0	0	0	1	0	1	1	1	1	0	1	0	0	0	0	0	0	0	4.27	126	38.6	182
787	1200711	0	1	42	0	0	0	0	0	0	0	0	0	0	0	0	0	0	0	0	0	0	0	0	0	1	0	0	0	0	0	0	1	1	2	0	0	0	0	0	1	0	0	0	0	3.95	120	36.9	190
788	1200933	0	2	79	1	1	1	1	1	1	0	0	0	0	0	0	0	0	0	0	0	0	0	0	0	0	0	0	1	0	1	1	2	3	1	0	1	0	0	0	0	0	0	0	0	3.24	95	29.2	259
789	1204186	0	2	50	0	1	0	0	0	0	0	0	0	0	0	0	0	0	0	0	0	0	0	0	0	0	0	0	0	0	0	0	2	3	1	0	0	0	0	0	1	0	0	0	1	3.53	103	31.4	141
790	1200432	0	2	49	0	0	0	0	0	0	0	0	0	0	0	0	0	0	0	0	0	0	0	0	0	0	0	0	0	0	1	0	2	3	1	0	0	0	0	0	1	0	0	0	1	3.77	108	31	84
791	1194037	0	1	25	0	0	0	0	0	0	0	0	0	0	0	0	0	0	0	0	0	0	0	0	0	0	0	0	0	0	0	0	1	3	1	0	0	0	0	0	0	0	0	0	0	5.33	150	45.9	183
792	1180676	1	2	36	0	0	1	0	0	0	0	0	0	0	0	0	0	0	0	0	0	0	0	0	0	1	0	0	0	0	0	1	1	1	2	1	0	1	0	0	0	0	0	0	0	3.17	88	28.1	261
793	1194862	0	1	57	0	0	0	0	0	0	0	0	1	0	0	0	0	0	0	0	1	0	0	1	0	1	0	0	0	0	1	1	2	1	2	1	0	0	0	0	1	0	1	1	1	1.65	49	14.2	122
794	1205210	0	2	45	0	0	0	0	0	0	0	0	0	0	0	0	0	0	0	0	0	0	0	0	0	1	0	0	0	1	0	1	3	3	1	1	0	0	0	0	0	0	0	0	0	3.98	113	33.9	191
795	1204233	0	1	67	1	1	0	0	0	1	0	1	0	0	0	0	0	0	0	0	0	0	0	0	0	0	0	0	0	1	1	0	1	3	1	1	1	0	0	0	0	0	0	0	1	3.89	124	38.2	120
796	1163595	0	1	57	0	1	0	0	0	0	0	0	1	0	0	0	0	0	0	0	1	1	0	1	0	1	0	0	0	0	0	0	1	1	2	0	0	0	0	0	0	0	0	0	0	3.25	102	30.2	112
797	1212254	1	1	76	1	1	1	0	0	0	0	0	0	0	0	0	0	0	0	0	0	0	0	0	0	1	0	0	0	0	1	0	1	1	2	1	1	1	1	1	0	0	0	1	1	4.44	140	43.8	212
798	1182989	0	1	72	1	1	0	0	1	1	0	0	0	0	0	0	0	0	0	0	0	0	0	0	0	0	0	0	0	1	0	0	1	3	2	1	1	1	0	0	0	0	1	0	1	3.67	122	37.4	159
799	1209695	1	1	69	1	0	0	0	0	1	0	0	0	0	0	0	0	0	0	0	0	0	0	0	0	0	0	1	0	1	0	1	2	3	2	1	1	1	1	1	1	0	1	1	1	2.46	75	23.1	66
800	1183693	1	2	28	0	0	0	0	0	0	0	0	1	0	0	0	0	0	0	0	0	0	0	0	0	1	0	0	0	1	0	0	1	3	2	0	0	0	0	1	1	0	0	1	1	3.44	92	72	72
801	1210581	1	2	40	0	0	0	0	0	0	0	0	0	0	0	0	0	0	0	0	0	0	0	0	0	1	0	0	0	0	0	0	1	2	2	0	0	0	0	0	0	0	0	0	0	3.88	115	34	133
802	1198875	1	1	39	0	0	0	0	0	0	0	1	0	0	0	0	0	0	0	0	1	0	0	1	0	1	0	0	0	0	0	0	1	2	2	0	0	0	0	0	0	0	0	1	0	3.26	101	31.5	259
803	1207578	0	1	51	0	1	0	0	0	0	0	0	0	0	0	0	0	0	0	0	0	0	0	0	0	1	0	0	0	0	0	0	1	1	2	0	0	0	0	0	0	0	0	0	0	4.25	128	37.5	205
804	1185294	0	2	50	0	0	0	0	0	0	0	0	0	0	0	0	0	0	0	0	1	0	0	1	0	0	0	0	0	1	0	0	3	3	2	0	0	0	0	0	0	0	0	0	0	3.6	75	33	95
805	1206081	0	2	64	0	0	0	0	0	1	0	0	1	0	0	0	0	0	0	0	0	0	0	0	0	0	0	0	0	0	1	0	1	3	2	1	1	1	0	0	1	0	0	1	1	3.26	109	33	125
806	1206848	1	1	65	1	0	0	0	0	0	0	0	0	0	0	0	0	0	0	0	0	0	0	0	0	0	0	0	0	0	0	1	1	1	2	0	0	0	0	0	0	1	0	1	1	2.23	70	21.1	28
807	1184477	0	2	62	0	1	0	0	0	0	0	0	0	0	0	0	0	0	0	0	0	0	0	0	0	0	0	0	0	1	0	0	3	3	1	1	0	0	0	0	0	0	0	0	0	3.23	97	29.4	112
808	1212310	0	1	32	0	0	0	0	0	0	0	0	0	0	0	0	0	0	0	0	0	0	0	0	0	0	0	0	0	1	1	0	1	3	1	1	0	1	0	0	0	0	0	0	0	3.68	110	33.5	258
809	1185654	1	2	61	0	0	0	0	0	1	0	0	0	0	0	0	0	0	0	0	0	0	0	0	1	1	0	0	0	0	0	1	1	1	2	0	1	0	0	0	0	1	0	0	0	2.82	84	25.4	43
810	1211809	0	1	76	1	0	0	0	0	0	0	0	0	0	0	0	0	0	0	1	0	0	0	0	0	0	0	0	0	1	0	0	3	3	1	0	0	0	1	0	0	0	0	0	1	1.63	51	18.7	365
811	1184493	0	2	49	0	0	0	0	0	0	0	0	1	0	0	0	0	0	0	0	1	0	0	1	0	1	0	0	0	0	0	1	1	1	2	0	0	0	0	0	0	0	0	0	0	4.07	68	27.1	168
812	1205822	0	1	66	1	0	0	0	0	0	0	0	0	0	0	0	0	0	0	0	0	0	0	0	0	0	0	0	0	0	0	0	4	1	1	1	0	0	0	0	0	0	0	0	0	5.52	172	54.4	230
813	1187976	0	1	74	1	0	0	0	0	0	0	0	0	0	0	0	0	0	0	0	0	0	0	0	0	1	0	0	0	1	0	0	1	2	2	0	0	0	0	0	0	0	0	0	0	3.29	104	31.9	206
814	1215937	1	2	51	0	0	0	0	0	0	0	0	0	0	0	0	0	0	0	0	0	0	0	0	0	0	1	0	1	0	1	0	3	3	1	1	0	0	0	1	0	0	0	0	0	2.59	77	22.9	165
815	1193441	1	2	72	1	1	0	0	0	0	0	1	0	0	0	0	0	0	0	0	0	0	0	0	0	1	0	0	0	0	1	1	2	3	2	1	0	0	0	0	0	0	0	1	1	3.75	106	29.5	154
816	1196685	0	1	47	0	0	0	0	0	0	0	0	1	1	0	0	0	0	0	0	1	1	0	1	0	1	0	0	0	0	0	1	1	1	2	0	0	0	0	0	1	0	0	0	0	3.55	77	24.3	129
817	1215185	0	2	29	0	1	1	0	0	0	0	0	1	0	0	0	0	0	0	0	0	0	0	0	0	0	0	0	0	1	1	0	2	1	2	0	0	0	0	0	1	0	0	0	0	3.89	126	37.8	143
818	1135123	0	1	43	0	0	0	0	0	0	0	0	1	1	0	0	0	0	0	0	1	0	0	1	0	0	1	0	0	1	1	1	1	3	2	0	0	1	0	0	1	1	0	0	1	2.39	80	23.3	25
819	1202089	1	1	66	1	0	0	0	0	1	0	1	0	0	0	0	0	0	0	0	0	0	0	0	1	1	0	0	0	1	0	0	1	3	2	1	1	0	0	1	1	0	0	0	1	3.38	98	31	87
820	1215755	0	1	50	0	1	0	0	0	0	0	0	1	0	0	0	0	0	0	0	0	0	0	0	0	0	0	0	0	1	0	0	2	3	1	0	0	0	0	0	0	0	0	0	0	4.73	156	43.1	82
821	1091225	0	1	77	1	1	1	1	1	1	0	0	0	0	0	0	0	0	0	0	0	0	0	0	0	0	0	1	1	1	0	1	2	3	1	1	1	1	1	1	1	0	0	1	1	2.69	80	24.2	202
822	1182075	0	2	59	0	0	0	0	0	0	0	0	0	0	0	0	0	0	0	0	1	0	0	1	0	1	0	0	0	0	0	1	1	2	2	0	0	0	0	0	0	0	1	0	0	2.67	80	24.9	132
823	1214431	1	2	50	0	0	0	0	0	0	0	0	0	0	0	0	0	0	0	0	0	0	0	0	0	0	0	0	999	1	0	0	3	3	1	1	0	0	1	1	0	0	0	0	1	4.29	123	38.1	145
824	987126	0	2	56	0	0	0	0	0	0	0	0	0	0	0	0	0	0	0	0	1	0	0	1	0	1	0	0	0	0	0	1	2	1	2	0	0	0	0	0	0	0	0	0	0	3.3	100	29.2	287
825	1186242	0	2	28	0	1	0	0	0	0	1	0	0	0	0	0	0	0	0	0	0	0	0	0	0	1	0	0	0	1	0	1	1	3	2	0	0	0	0	0	0	0	0	0	0	1.91	61	16.7	71
826	1197441	0	1	17	0	0	0	0	0	0	0	0	0	0	0	0	0	0	0	0	0	0	0	0	0	0	0	0	1	1	1	0	2	3	1	0	0	0	0	0	0	0	0	0	0	5.03	147	45.1	417
827	1204123	0	2	32	0	0	0	0	0	0	0	0	0	0	0	0	0	0	0	0	0	0	0	0	1	1	0	0	0	1	0	0	1	1	2	0	1	0	0	0	0	0	0	0	0	4.08	110	35.8	162
828	1214545	1	2	60	0	1	0	0	0	0	0	0	0	0	0	0	0	0	0	0	1	0	0	1	0	0	0	0	0	1	0	0	2	3	1	0	0	0	0	0	0	0	0	0	0	5.02	143	43.4	257
829	1197008	0	1	70	1	0	0	0	0	0	0	0	0	0	0	0	0	0	0	0	0	0	0	0	1	1	0	0	0	0	0	0	1	1	2	0	0	0	0	0	0	1	0	0	0	3.78	113	35.6	58
830	1202277	0	2	42	0	0	0	0	0	0	0	0	0	0	0	0	0	0	0	0	1	0	0	1	0	1	0	0	0	0	0	0	1	2	2	0	0	0	0	0	0	0	0	0	0	3.98	133	37.5	267
831	1212960	0	1	40	0	0	0	0	0	0	0	0	0	0	0	1	0	0	0	0	0	0	0	1	0	0	0	0	0	1	0	1	4	3	1	0	0	0	0	0	0	1	0	0	1	1.53	51	15.4	23
832	1170418	1	2	66	1	0	0	0	0	1	0	0	0	0	0	0	0	0	0	0	0	0	0	0	1	1	0	0	0	1	0	1	1	2	2	0	1	1	0	1	1	0	0	0	1	2.84	65	20.4	152
833	1001021	1	2	81	1	1	0	0	0	0	1	1	0	0	0	0	0	0	0	0	0	0	0	0	0	0	0	0	0	1	1	1	1	3	1	1	0	1	0	0	0	0	0	1	0	2.9	90	27.6	107
834	1213804	0	1	49	0	0	1	0	0	1	0	0	0	0	0	0	0	0	0	0	0	0	0	0	1	1	0	0	0	1	0	0	1	3	2	0	1	1	1	1	1	0	0	1	1	3.36	112	34	79
835	1195344	0	1	55	0	1	1	0	0	0	0	0	0	0	0	0	0	0	0	0	1	0	0	1	0	1	0	0	0	0	0	0	1	1	2	0	0	0	0	0	0	0	0	0	0	4.27	137	40.4	237
836	1181516	0	1	64	0	0	0	0	0	0	0	0	1	0	0	0	0	0	0	1	1	1	0	1	0	0	0	0	0	1	0	0	4	1	1	1	0	0	0	0	1	0	0	0	0	3.84	109	33.2	263
837	1201882	0	1	62	0	0	0	0	0	0	0	0	1	0	0	0	0	0	0	0	0	0	0	0	0	0	1	0	0	1	1	0	1	3	1	1	0	1	0	0	1	1	0	0	1	3.42	109	30.2	38
838	1204084	1	2	52	0	1	0	0	0	0	0	0	0	0	1	0	0	0	0	0	0	0	0	0	0	0	0	0	1	0	1	0	2	3	1	0	0	0	1	1	0	0	0	0	1	1.87	58	18.2	132
839	1185459	0	2	32	0	0	0	0	0	0	0	0	1	0	0	0	0	0	0	0	0	0	0	0	0	0	0	0	0	1	1	0	2	1	2	0	0	1	0	0	1	1	0	0	1	6	154	45.4	15
840	1197707	1	1	63	0	1	0	0	0	0	0	1	0	0	0	0	0	0	0	0	0	0	0	0	0	0	0	0	0	1	0	1	1	1	2	1	0	0	0	1	0	1	0	1	1	2.59	82	25.1	28
841	1171103	1	1	64	0	1	1	0	1	0	1	0	0	0	0	0	0	0	0	0	1	0	0	1	0	0	0	0	0	0	1	0	1	2	2	1	1	1	1	1	0	0	0	1	1	3.73	109	33.8	174
842	1209524	1	2	21	0	0	0	0	0	0	0	0	1	0	0	0	0	0	0	0	0	0	0	0	0	1	1	0	0	0	0	0	1	3	2	0	0	1	0	1	1	1	0	1	1	1.75	45	13.9	49
843	1213674	1	2	28	0	0	0	0	0	0	0	0	1	0	0	0	0	0	0	0	0	0	0	0	0	0	0	0	1	1	0	0	4	3	1	0	0	0	0	0	1	0	0	0	1	4.08	110	33.4	104
844	1188563	1	1	43	0	1	0	0	0	0	0	1	0	0	0	0	0	0	0	0	0	0	0	0	0	0	0	0	0	1	1	1	4	3	1	1	0	1	1	1	0	0	0	1	1	2.85	87	25.6	201
845	1183101	1	1	58	0	0	0	0	0	1	0	0	0	0	0	0	0	0	0	0	0	0	0	0	1	1	0	0	0	1	0	1	1	3	2	0	1	1	0	0	0	0	0	0	1	2.95	91	27.4	107
846	1183566	0	2	30	0	0	0	0	0	0	0	0	1	1	0	0	0	0	0	0	1	1	0	1	0	0	0	0	0	0	0	0	2	2	2	1	0	0	0	0	1	0	0	0	0	5.14	144	43.8	80
847	1134915	1	1	64	0	1	0	0	0	0	0	1	0	0	0	0	0	0	0	0	1	0	0	1	0	1	0	0	0	0	1	0	1	1	2	1	0	1	1	1	0	0	0	0	1	3.61	117	33.6	104
848	1196164	0	1	48	0	0	0	0	0	0	0	0	0	0	0	0	0	0	0	0	0	0	0	0	0	1	0	0	0	1	0	0	1	3	2	0	0	0	0	0	0	0	0	0	0	4.5	135	40.2	209
849	1186335	0	1	62	0	0	0	0	0	1	0	0	0	0	0	0	0	0	0	1	0	0	0	0	0	0	0	0	0	1	0	0	4	3	1	1	1	0	0	0	1	0	0	0	1	3.73	111	35.5	238
850	909281	1	1	52	0	1	1	0	0	0	0	0	0	0	0	0	0	0	0	0	1	0	0	1	0	0	0	1	0	1	0	0	3	3	1	0	0	0	0	0	0	0	0	0	0	2.97	96	28	151
851	1201496	0	1	25	0	0	0	0	0	0	0	0	1	0	0	0	0	0	0	0	0	0	0	0	0	1	1	0	0	0	0	0	1	1	1	1	1	1	0	1	1	1	0	1	1	5.62	168	49.8	14
852	1214836	1	2	19	0	0	0	0	0	0	0	0	0	0	0	0	0	0	0	0	0	0	0	0	1	1	0	0	0	1	0	0	1	1	2	0	1	0	1	1	0	0	0	0	1	3.33	100	29.8	120
853	1216707	1	2	50	0	1	0	0	0	0	0	0	0	0	0	0	0	0	0	0	0	0	0	0	1	1	0	0	0	1	0	0	1	3	2	0	0	0	0	0	0	0	0	0	0	4.24	107	32.1	246
854	1205732	1	2	63	0	0	0	0	0	0	0	1	0	0	0	0	0	0	0	0	0	0	0	0	0	1	0	0	0	0	0	1	4	2	2	0	0	0	0	0	0	0	0	0	0	3.16	90	28.3	313
855	1208882	1	2	19	0	1	0	0	0	0	0	0	0	0	0	0	0	0	0	0	0	0	0	0	0	1	0	0	0	0	1	1	4	3	2	0	0	0	0	0	0	1	0	0	1	3.01	88	27.1	14
856	1199390	0	1	57	0	1	0	0	0	1	0	1	0	0	0	0	0	0	0	0	0	0	0	0	1	1	0	0	0	1	0	0	1	2	2	0	1	0	0	0	0	0	0	0	0	2.4	76	23	127
857	1193913	0	1	62	0	0	0	0	0	0	1	0	1	1	0	0	0	0	0	0	0	0	0	0	0	1	0	0	0	0	0	0	1	1	2	0	0	0	0	0	1	0	0	0	1	4.68	143	42.6	99
858	1205760	0	2	50	0	1	0	0	0	0	0	0	0	0	0	0	0	0	0	0	0	0	0	0	1	1	1	0	0	1	0	1	1	3	2	0	0	0	1	1	0	0	0	1	1	3.47	85	27.9	90
859	1180178	0	1	65	1	0	1	0	0	0	0	0	0	0	0	0	0	0	0	0	1	0	0	1	0	1	0	0	0	0	0	0	1	1	2	0	0	0	0	0	0	1	0	0	0	2.51	81	23.9	56
860	1159319	0	1	69	1	1	1	1	0	0	1	0	0	0	0	0	0	0	0	0	0	0	0	0	0	0	0	0	0	1	0	1	1	3	2	0	0	0	0	0	0	0	0	0	0	3.05	88	28	424
861	956491	0	1	28	0	0	0	0	0	0	0	0	0	0	0	0	0	0	0	0	0	0	0	0	0	0	0	0	1	0	0	1	1	3	1	0	0	1	1	1	1	1	0	1	1	2.54	73	24.1	9
862	1194755	0	2	51	0	0	0	0	0	0	0	0	1	0	0	0	0	0	0	0	1	0	0	1	0	1	0	0	0	0	0	1	4	1	2	0	0	0	0	0	1	0	0	0	0	2.98	92	28.4	205
863	980256	1	1	65	1	0	0	0	0	0	0	0	1	1	0	0	0	0	0	0	1	0	0	1	0	1	0	0	0	0	0	1	1	2	2	1	0	1	0	0	1	0	0	0	1	1.97	61	19.4	230
864	1176433	1	2	35	0	0	0	0	0	0	0	0	0	0	0	0	0	0	0	0	0	0	0	0	0	1	0	0	0	0	0	1	1	1	2	1	0	0	0	0	0	0	0	0	0	3.73	98	31.8	179
865	1139371	0	2	21	0	1	0	0	0	0	0	0	0	0	0	1	1	0	0	0	0	0	0	1	0	0	0	0	0	1	0	0	3	3	1	0	0	0	0	0	0	0	0	0	0	3.39	98	30.3	91
866	1124019	0	1	64	0	0	0	0	0	0	0	0	0	0	0	0	0	0	0	0	1	0	0	1	0	0	0	0	0	1	0	0	1	2	1	1	0	0	0	0	1	0	0	0	0	4.4	148	44.1	146
867	1202621	0	2	70	1	1	0	0	0	0	0	0	0	0	0	0	0	0	0	0	0	0	0	0	0	0	0	0	0	1	0	0	2	3	2	1	0	0	0	0	1	0	0	0	1	4.11	121	37.7	104
868	1209296	0	2	53	0	0	0	0	0	0	0	0	0	0	0	0	0	0	0	0	1	0	0	1	0	1	0	0	0	0	0	1	1	1	2	0	0	0	0	0	0	0	0	0	0	2.4	65	19	165
869	1190426	1	1	82	1	0	1	0	0	0	0	0	0	0	0	0	0	1	0	0	0	0	0	0	0	1	0	0	0	0	0	0	4	1	2	0	0	0	0	0	0	0	0	1	1	3	92	30.6	483
870	1214687	0	1	63	0	0	0	0	0	0	0	0	0	0	0	0	0	0	0	0	0	0	0	0	1	1	0	0	0	0	0	0	1	1	2	0	1	0	0	0	0	0	0	0	0	4.56	144	42.3	189
871	1178246	0	1	52	0	0	0	0	0	0	0	0	1	0	0	0	0	0	0	0	0	0	0	0	0	0	0	0	1	1	0	0	2	1	1	1	0	0	0	0	0	0	0	0	0	3.49	108	32.1	241
872	1207709	0	1	34	0	1	0	0	0	0	0	0	1	0	0	0	0	0	0	0	0	0	0	0	0	0	0	0	1	1	0	0	2	3	1	1	0	0	0	0	0	0	0	0	0	3.49	108	32.1	241
873	1183062	1	1	56	0	0	0	0	0	1	0	0	0	0	0	0	0	0	0	0	0	0	0	0	1	1	0	0	0	0	0	0	1	1	2	1	1	0	0	0	0	0	0	0	0	3.9	116	35.3	155
874	1187606	0	2	28	0	1	0	0	0	0	0	0	0	0	1	0	0	0	0	0	0	0	0	0	0	0	0	1	0	1	1	1	2	3	2	1	0	0	0	0	0	0	0	0	0	2.06	59	17.8	164
875	1211007	1	1	31	0	0	0	0	0	0	0	0	0	0	0	0	0	0	0	0	0	0	0	0	1	1	0	0	0	1	1	1	1	3	2	0	0	0	0	0	0	1	0	0	1	2.68	80	24	32
876	1202207	0	1	67	1	1	0	0	0	0	0	0	1	0	0	0	0	0	0	0	0	0	0	0	0	1	0	0	0	0	0	0	1	2	2	0	0	0	0	0	1	0	0	0	1	4.31	126	37.1	102
877	1186208	0	1	36	0	0	0	0	0	0	0	0	0	0	0	0	0	0	0	0	0	0	0	0	0	0	0	0	0	1	0	0	2	3	1	0	0	0	0	0	1	0	0	1	1	4.13	122	34.5	99
878	1188312	0	2	29	0	0	0	0	0	0	0	0	0	0	0	0	0	0	0	0	0	0	0	0	0	1	0	0	0	0	0	0	1	1	2	1	0	0	0	0	0	0	0	0	0	3.28	101	30.3	174
879	1179828	0	2	51	0	0	0	0	0	0	0	0	0	0	0	0	0	0	0	0	1	0	0	1	0	0	0	0	0	0	0	0	2	1	2	0	0	0	0	0	0	0	0	0	0	3.96	114	35.2	200
880	1178866	0	1	46	0	0	0	0	0	0	0	0	1	0	0	0	0	0	0	0	0	0	0	0	0	1	0	0	0	0	0	0	1	1	2	0	0	0	0	0	0	0	0	0	0	2.95	87	27	208
881	1205086	0	2	65	1	1	0	0	0	1	0	0	0	0	0	0	0	0	0	0	0	0	0	0	1	1	0	0	0	1	0	0	1	1	2	0	1	0	0	0	1	0	0	0	0	3.53	109	30.2	185
882	1209273	1	2	41	0	0	0	0	0	0	0	0	0	0	0	0	0	0	0	0	0	0	0	0	1	1	0	0	999	0	0	1	2	3	2	0	0	1	0	1	1	1	0	0	1	2.67	78	23.6	56
883	1212768	1	2	37	0	0	0	0	0	0	1	0	0	0	0	0	0	0	0	0	0	0	0	0	0	1	0	0	0	0	0	0	1	2	2	1	0	1	1	1	0	1	0	0	0	3.51	109	32.5	52
884	1183111	1	1	58	0	1	0	0	0	0	0	0	0	0	0	0	0	0	0	0	1	0	0	1	0	1	0	0	0	1	0	1	1	3	2	1	0	0	1	1	0	0	0	0	1	2.92	56	18.6	245
885	1198390	1	2	49	0	0	0	0	0	0	0	0	0	0	0	0	0	0	0	0	0	0	0	0	1	1	0	0	0	1	0	1	1	1	2	1	1	0	0	0	1	0	0	0	1	3.64	110	33.1	92
886	1198289	1	2	80	1	1	1	0	0	0	0	0	1	1	0	0	0	0	0	0	0	0	0	0	0	0	0	0	0	1	0	0	2	3	1	0	0	0	0	0	0	0	0	0	0	4.23	119	35.7	178
887	1193625	0	1	63	0	0	0	0	0	0	0	0	1	1	0	0	0	0	0	0	0	0	0	0	0	0	0	0	0	0	1	1	2	3	2	1	0	0	0	0	0	1	0	1	1	2.5	62	19.3	32
888	1198569	1	1	63	0	1	1	0	0	0	0	1	1	0	0	0	0	0	0	0	0	0	0	0	0	0	1	0	0	0	1	0	1	1	2	1	0	0	1	1	1	0	0	1	1	3.51	102	30.1	423
889	1210639	0	1	43	0	0	0	0	0	0	0	0	0	0	0	0	0	0	0	0	0	0	0	0	0	0	0	0	0	0	0	0	2	3	1	0	0	0	0	0	0	0	0	0	0	3.68	109	32.4	368
890	1179645	0	2	52	0	0	0	0	0	0	0	0	0	0	0	0	0	0	0	0	0	0	0	0	0	1	0	0	0	0	0	0	1	1	2	0	0	0	0	0	0	0	0	0	0	4.67	134	41.5	233
891	1203194	1	2	85	1	1	0	0	0	1	0	1	1	0	0	0	0	0	0	0	1	0	0	1	0	0	1	0	1	1	0	1	1	2	1	1	1	0	1	1	1	0	0	1	1	3.79	89	29.3	257
892	1180410	1	1	55	0	1	0	0	0	0	0	0	1	0	0	0	0	0	0	0	1	1	0	1	0	0	1	0	0	0	0	1	1	3	2	1	0	1	1	1	0	0	0	1	1	2.8	84	22.5	162
893	1188736	1	1	44	0	0	0	0	0	0	0	0	1	1	0	0	0	0	0	0	1	0	0	1	0	1	0	0	0	1	1	1	1	2	2	1	0	1	1	1	1	1	1	1	1	2.9	88	26.7	47
894	1185162	0	2	65	1	1	0	0	0	0	0	1	0	0	0	0	0	0	1	0	0	0	0	0	0	1	0	0	0	0	0	0	1	1	2	1	0	0	0	0	0	0	0	0	0	3.9	124	39.1	262
895	1179989	0	1	44	0	1	0	0	0	0	0	0	0	0	0	0	0	0	0	0	0	0	0	0	1	1	0	0	0	1	0	0	1	2	2	0	0	0	0	1	1	0	0	0	1	3.34	100	30	62
896	1204696	1	1	27	0	0	0	0	0	0	0	0	0	0	0	0	0	0	0	0	0	0	0	0	0	1	1	0	0	0	0	1	1	2	2	1	0	0	0	1	0	0	0	1	1	3.24	97	30.2	243
897	1211368	1	1	37	0	0	0	0	0	0	0	0	1	0	0	1	0	0	0	0	0	0	0	1	0	0	0	1	0	1	0	1	2	3	2	1	0	1	1	1	0	1	1	1	1	2.84	61	18.2	32
898	1194462	1	1	62	0	0	0	0	0	1	0	0	1	0	0	0	0	0	0	0	0	0	0	0	0	0	1	0	0	1	1	0	1	1	1	1	1	1	1	1	1	0	0	1	1	4.44	116	37	135
899	1186913	1	1	58	0	0	0	0	0	0	0	0	0	0	0	0	0	0	0	0	0	0	0	0	1	1	0	0	0	0	0	0	1	1	2	0	1	0	0	0	0	0	0	0	0	3.56	104	31.4	115
900	1196898	0	2	24	0	1	0	0	0	0	0	0	0	0	1	0	0	0	0	0	0	0	0	0	0	1	0	0	1	1	1	1	2	3	1	1	0	0	0	0	0	0	0	0	0	20.1	91	28.5	188
901	1179437	0	2	75	1	0	0	0	0	0	0	0	0	0	0	0	0	0	0	0	1	0	0	1	0	1	0	0	0	0	1	0	1	1	2	0	0	0	0	0	1	0	0	0	1	2.05	65	20.1	169
902	1180822	0	2	59	0	0	0	0	0	0	0	0	0	0	0	0	0	0	0	0	0	0	0	0	0	0	0	0	0	1	0	0	2	3	1	1	0	0	0	0	0	1	0	0	0	4.27	121	34.4	47
903	1206206	0	2	69	1	1	0	0	0	0	0	0	0	0	0	0	0	0	0	0	0	0	0	0	0	0	0	0	0	0	0	0	2	3	1	0	0	0	0	0	1	1	0	0	1	3.13	101	28.9	58
904	1145674	0	1	77	1	0	0	0	0	0	0	0	0	0	0	0	1	0	0	0	0	0	0	1	0	0	0	0	0	1	1	1	2	2	2	1	0	0	0	0	0	0	0	0	0	2.63	84	25.3	172
905	1179493	0	1	58	0	1	0	0	0	0	0	0	1	0	0	0	0	0	0	0	0	0	0	0	0	0	1	0	0	1	0	0	2	2	1	0	0	1	0	0	0	1	0	0	1	30.3	99	30.3	52
906	1183926	0	1	66	1	0	0	0	0	1	0	0	0	0	0	0	0	0	0	0	0	0	0	0	0	0	0	0	0	1	0	0	2	3	2	1	1	0	0	0	0	0	0	0	1	3.57	105	33.3	98
907	1196895	1	2	70	1	0	0	0	0	0	1	1	1	0	0	0	0	0	0	0	1	0	0	1	0	1	0	0	0	1	0	0	1	1	2	0	0	1	0	1	0	0	0	1	0	2.95	90	26.1	94
908	1201223	1	1	46	0	0	1	0	0	0	0	0	0	0	0	0	0	0	0	0	0	0	0	0	0	0	0	0	0	0	0	1	1	1	2	1	0	1	0	1	1	0	0	0	0	3.1	91	28.4	142
909	1191417	0	2	47	0	0	0	0	0	0	0	0	0	0	0	0	0	0	0	0	1	0	0	1	0	1	0	0	0	0	0	0	1	1	2	0	0	0	0	0	0	0	0	0	0	4.28	129	37.2	94
910	1185431	1	1	64	0	1	1	0	1	0	0	0	0	0	0	0	0	0	0	0	0	0	0	0	1	1	0	0	0	1	0	0	2	2	2	0	1	1	0	1	0	0	0	0	1	4.09	121	37.5	141
911	1203184	0	1	27	0	0	0	0	0	0	0	0	0	0	0	0	0	0	0	0	0	0	0	0	0	0	0	0	1	0	1	1	2	3	1	0	0	0	0	0	0	0	0	0	0	2.53	72	21.7	350
912	998035	1	2	63	0	1	1	1	1	1	0	0	0	0	0	0	0	0	0	0	0	0	0	0	0	0	0	1	0	1	1	1	2	3	2	1	1	1	1	1	0	0	0	1	1	3.65	116	33.2	143
913	1196391	1	2	52	0	1	0	0	0	0	0	0	0	0	0	1	0	0	0	0	0	0	0	1	0	0	0	0	0	0	0	0	1	2	1	0	0	0	0	1	0	0	0	0	0	2.68	81	26.2	379
914	1200247	0	1	69	1	1	0	0	0	0	0	1	0	0	0	0	0	0	0	0	1	0	0	1	0	0	0	0	0	0	0	0	2	3	2	1	0	0	0	0	0	0	0	0	0	4.77	142	40.6	85
915	1182357	1	1	23	0	0	0	0	0	1	0	0	0	0	1	0	0	0	0	0	0	0	0	0	0	0	0	0	0	1	0	1	1	2	2	1	1	1	1	1	1	0	1	1	1	3.28	78	26.3	307
916	1157401	1	2	52	0	0	0	0	0	0	0	0	1	0	0	0	0	0	0	0	1	1	0	1	0	0	0	0	0	0	0	0	2	1	2	0	0	0	0	0	0	0	0	0	0	4.29	103	33.8	333
917	1197295	0	1	47	0	0	1	0	0	0	0	0	0	0	0	0	0	0	0	0	1	0	0	1	0	1	0	0	0	0	0	0	1	1	2	0	0	0	0	1	1	0	0	0	0	4.9	146	42.9	255
918	1160938	0	2	63	0	1	0	0	0	0	0	0	1	0	0	0	0	0	0	0	0	0	0	0	0	1	0	0	0	1	0	0	1	1	2	0	0	0	0	0	0	0	0	0	0	3.54	104	31.5	155
919	1193390	0	1	34	0	0	0	0	0	0	0	0	0	0	0	0	0	0	0	0	0	0	0	0	0	1	1	0	0	0	1	0	1	2	2	1	0	1	1	1	1	0	0	0	1	3.7	120	33.3	100
920	1216770	0	1	30	0	0	0	0	0	0	0	0	1	0	0	0	0	0	0	0	0	0	0	0	0	0	1	0	0	1	0	0	1	2	1	0	0	1	0	0	0	1	0	0	1	4.27	135	40.1	49
921	1197567	1	1	65	1	0	0	0	0	0	0	0	1	1	0	0	0	0	0	0	0	0	0	0	0	1	0	0	0	0	0	1	1	1	2	1	0	1	1	1	1	0	0	0	1	1.34	43	13.4	105
922	1206354	1	1	52	0	1	0	0	0	0	0	0	0	0	0	0	0	0	0	0	0	0	0	0	1	1	0	0	0	0	0	0	2	3	2	1	0	1	1	1	1	0	0	1	1	2.7	81	24.5	88
923	1214949	0	1	38	0	0	0	0	0	0	0	0	1	0	0	0	0	0	0	0	0	0	0	0	0	1	1	0	0	0	0	0	1	1	2	0	1	0	0	0	0	0	0	0	0	2.59	71	23.7	222
924	1184615	0	2	21	0	0	0	0	0	0	0	0	0	0	0	0	0	0	0	0	0	0	0	0	0	0	0	0	1	1	1	0	1	3	2	1	1	1	1	1	1	0	0	1	1	3.87	114	36	114
925	1183454	1	2	68	1	0	0	0	0	0	0	0	0	0	1	0	0	0	0	0	0	0	1	0	0	0	0	0	0	1	1	0	1	2	2	1	0	1	1	1	1	0	0	1	1	4.74	140	45.1	299
926	1203222	0	2	29	0	0	0	0	0	0	0	0	1	0	0	0	0	0	0	0	0	0	0	0	0	1	0	0	0	1	1	1	1	3	1	0	0	0	0	0	1	0	0	0	1	2.61	72	21.9	119
927	1201123	1	1	50	0	0	0	0	0	0	0	1	0	0	0	0	0	0	0	0	0	0	0	0	0	0	1	0	0	0	0	1	1	2	2	0	0	1	1	1	0	0	0	1	1	3.03	90	28.3	204
928	1200672	1	1	62	0	0	0	0	0	0	0	1	0	0	0	0	0	0	0	0	0	0	0	0	0	1	0	0	0	0	0	1	2	1	2	1	0	0	0	1	1	0	0	1	1	2.54	73	22.7	136
929	1043789	1	1	46	0	0	0	0	0	0	0	1	0	0	0	0	0	0	0	0	0	0	0	0	1	1	0	0	0	0	0	0	1	1	2	1	1	0	0	1	1	0	0	0	1	4.02	120	35.9	216
930	1178036	0	1	24	0	0	0	0	0	0	0	0	0	0	0	0	0	0	0	0	0	0	0	0	0	0	1	0	0	1	0	0	1	3	2	0	0	1	0	0	0	0	0	0	0	4.14	172	38.5	306
931	1176258	0	2	47	0	0	0	0	0	0	0	0	0	0	0	0	0	0	0	0	0	0	0	0	0	1	1	0	0	0	0	1	1	2	2	1	0	1	0	0	0	0	0	0	0	3.87	90	28.9	114
932	1178436	1	1	74	1	0	0	0	0	0	0	0	0	0	0	0	0	0	0	0	1	1	0	1	0	0	0	0	0	1	0	0	2	3	2	1	0	1	1	1	1	0	0	1	1	4.83	153	48.2	218
933	1212870	1	1	61	0	0	0	0	0	0	0	0	0	0	0	0	0	0	0	0	1	0	0	1	0	1	1	0	0	0	0	0	1	3	2	0	0	1	1	1	0	0	0	0	1	4.01	111	35.4	204
934	1186566	1	1	34	0	0	0	0	0	0	0	0	1	1	0	0	0	0	0	0	1	0	0	1	0	1	0	0	0	1	1	0	1	3	2	1	0	1	0	1	1	0	0	1	1	2.64	78	24.1	76
935	1172643	0	1	50	0	0	0	0	0	0	0	0	0	0	0	0	0	0	0	0	0	0	0	0	0	1	0	0	0	1	0	0	1	1	1	1	0	0	0	0	0	0	0	0	0	7.86	225	68	190
936	1217228	1	1	61	0	0	0	0	0	0	0	1	0	0	0	0	0	0	0	0	0	0	0	0	0	0	1	0	0	1	0	1	1	3	2	1	0	1	1	1	1	0	0	1	1	2.47	75	22.9	120
937	1178057	1	1	49	0	0	0	0	0	1	0	0	0	0	0	0	0	0	0	0	0	0	0	0	1	1	0	0	0	1	0	0	1	2	2	0	1	1	0	0	0	0	0	0	1	2.53	73	22.8	158
938	1206483	0	2	72	1	1	1	0	0	0	0	0	0	0	0	0	0	0	0	0	1	0	0	1	0	0	1	0	0	1	0	0	2	3	2	1	0	1	1	0	0	0	1	1	1	3.31	109	33.7	359
939	1202374	1	2	49	0	0	0	0	0	0	0	0	0	0	0	0	0	0	0	0	0	0	0	0	0	1	1	0	0	0	0	1	1	1	2	1	0	1	1	1	0	1	0	1	1	35.8	71	22.6	56
940	1178656	0	1	33	0	0	0	0	0	0	0	0	1	0	0	0	0	0	0	0	0	0	0	0	0	0	1	0	0	0	0	0	1	2	1	1	0	1	0	0	0	0	0	0	1	6.14	200	67.2	137
941	1188905	0	2	51	0	0	1	0	0	0	0	0	0	0	0	0	0	0	0	0	0	0	0	0	0	1	0	0	0	0	0	0	2	2	2	1	0	1	0	0	1	0	0	0	1	5	146	44.4	109
942	1192725	1	1	45	0	0	0	0	0	0	0	0	0	0	0	0	0	0	0	0	0	0	0	0	0	1	1	1	0	1	0	1	1	3	2	1	0	1	1	1	1	1	0	0	1	3.92	122	34.5	14
943	1172513	1	1	19	0	0	0	0	0	0	1	0	0	0	0	0	0	0	0	0	0	0	0	0	0	0	1	0	0	0	0	0	1	2	2	1	1	1	1	1	1	0	0	1	1	3.85	112	33.9	88
944	1207857	1	2	51	0	0	0	0	0	0	0	0	1	0	0	1	0	0	0	0	0	0	0	1	0	0	0	0	0	0	0	1	2	3	2	1	1	0	1	1	1	1	0	0	1	14.8	51	14.8	29
945	1196469	0	2	78	1	0	0	0	0	0	0	0	1	1	0	0	0	0	0	0	0	0	0	0	0	0	0	0	0	1	0	1	1	2	1	0	0	0	0	0	0	0	1	0	1	3.4	82	26.4	88
946	1145096	0	2	65	1	1	0	0	0	0	0	0	0	0	0	0	0	0	0	0	0	0	0	0	0	1	0	1	0	1	0	1	3	3	2	0	0	0	0	0	0	0	0	0	0	2.88	58	21	224
947	1206263	0	1	52	0	1	0	0	0	0	0	0	1	0	0	0	0	0	0	0	0	0	0	0	0	0	0	0	0	1	1	1	4	3	1	0	0	0	0	0	0	0	0	0	0	2.18	63	19.2	141
948	1206028	0	1	66	1	0	1	0	0	0	1	0	0	0	0	0	0	0	0	0	0	0	0	0	0	0	0	1	1	0	1	1	2	2	1	1	0	0	0	0	0	0	0	0	0	2.36	70	22.3	125
949	1190946	0	2	26	0	1	0	0	0	0	0	0	0	0	1	0	0	0	0	0	0	0	0	0	0	0	0	0	1	1	0	0	2	2	1	1	0	0	0	0	0	0	0	0	0	2.42	67	20.2	136
950	1175984	1	1	22	0	0	0	0	0	1	0	0	1	0	0	0	0	0	0	0	0	0	0	0	0	0	0	0	0	1	1	1	2	3	2	1	1	1	1	1	0	0	0	1	1	2.29	68	20.9	358
951	1193795	1	2	72	1	0	1	1	0	1	0	1	0	0	0	0	0	0	0	0	0	0	0	0	0	0	0	1	0	0	0	1	2	1	2	1	1	1	1	0	0	0	0	1	1	2.14	70	21.9	73
952	1187090	1	1	50	0	0	0	0	0	1	0	0	0	0	0	0	0	0	0	0	0	0	0	0	1	1	0	0	0	1	0	1	1	1	2	0	1	0	0	0	0	0	0	0	0	2.99	78	23.9	62
953	1201681	0	2	15	0	0	0	0	0	1	0	0	0	0	0	0	0	0	0	0	0	0	0	0	1	1	0	0	0	1	0	1	1	1	2	0	1	0	0	0	0	0	0	0	0	2.45	72	22.1	140
954	1204036	0	2	61	0	1	0	0	0	1	0	0	0	0	1	0	0	0	0	0	0	0	0	0	0	0	0	1	1	1	1	1	2	3	2	1	1	0	0	0	0	0	0	0	1	2.42	75	22.7	114
955	1209709	1	2	49	0	0	0	0	0	0	0	1	0	0	0	0	0	0	0	0	0	0	0	0	0	1	0	0	0	0	0	0	1	1	2	1	0	0	0	0	0	0	0	1	0	2.58	76	23.5	64
956	1143905	0	1	71	1	0	0	0	0	0	0	0	0	0	0	0	0	0	0	0	1	0	0	1	0	1	0	0	0	1	0	0	1	3	2	1	0	0	0	0	0	0	0	0	0	2.35	77	23.7	215
957	1206677	0	1	59	0	0	0	0	0	1	0	0	0	0	0	0	0	0	0	0	0	0	0	0	1	1	0	0	0	1	0	1	2	3	2	0	1	0	0	0	0	0	0	0	1	3.33	78	24.3	360
958	1197138	0	1	19	0	0	0	0	0	0	0	0	1	0	0	0	0	0	0	0	0	0	0	0	0	0	0	0	0	1	0	1	2	3	1	0	0	0	0	0	0	0	0	0	0	2.48	79	21.7	141
959	1184885	0	2	60	0	0	0	0	0	0	0	0	0	0	1	0	0	0	0	0	0	0	0	0	0	0	0	0	0	0	0	0	2	2	1	0	0	0	0	0	0	0	0	0	0	3.09	79	22.7	136
960	1211339	0	2	62	0	0	0	0	0	0	0	0	0	0	0	0	0	0	0	0	1	0	0	1	0	1	0	0	0	0	0	1	1	1	2	0	0	0	0	0	0	0	0	0	0	3.84	82	25.9	175
961	1171818	0	2	81	1	1	1	0	0	0	0	0	0	0	0	0	1	0	0	0	0	0	0	1	0	0	0	0	0	0	0	1	4	3	2	0	0	0	0	0	0	0	1	1	1	2.64	82	25.4	157
962	1194770	1	2	44	0	0	0	0	0	0	1	0	1	0	0	0	0	0	0	0	1	0	0	1	0	1	0	0	0	0	0	1	1	1	2	1	0	0	0	0	1	0	0	0	0	4.27	99	31.7	83
963	1183317	1	2	41	0	0	0	0	0	0	0	0	0	0	0	0	0	0	0	0	0	0	0	0	1	1	0	0	0	0	0	1	1	1	2	1	0	0	0	1	1	0	0	0	0	2.89	84	24.9	148
964	1203544	0	2	72	1	0	0	0	0	0	0	0	0	0	0	0	0	0	0	0	0	0	0	0	0	1	0	0	0	0	0	0	1	1	2	0	0	0	0	0	0	0	0	0	0	3.01	84	26	231
965	1193066	0	2	28	0	0	0	0	0	0	0	0	0	0	1	0	0	0	0	0	0	0	0	0	0	0	0	0	1	1	0	1	2	2	1	0	0	0	0	0	0	0	0	0	0	3.33	86	26.4	205
966	1213146	1	1	38	0	0	0	0	0	0	0	0	1	1	0	0	1	0	0	0	0	0	0	1	0	0	0	0	0	1	0	0	2	3	1	1	0	1	1	1	1	1	0	1	1	3.2	97	27.6	35
967	1211771	1	1	66	1	0	0	0	1	0	0	0	0	0	0	0	0	0	0	0	0	0	0	0	0	0	0	0	0	0	0	1	1	1	2	0	1	1	0	1	1	0	0	1	1	3.26	99	30.9	281
968	1189658	1	2	60	0	0	0	0	0	0	0	0	0	0	0	0	0	0	0	0	1	0	0	1	0	1	0	0	0	0	0	1	1	1	2	1	0	0	0	0	0	0	0	0	0	3.85	91	28.8	92
969	1210007	0	2	61	0	1	1	0	0	0	0	0	1	1	0	0	0	0	0	0	0	0	0	0	0	1	0	0	0	0	0	1	1	1	2	0	0	0	0	0	0	0	1	0	0	2.99	93	27.2	268
970	1200986	0	1	22	0	0	1	1	0	0	0	0	1	0	0	0	0	0	0	0	0	0	0	0	0	0	1	0	1	1	0	0	1	2	2	1	0	0	0	0	1	0	0	0	1	3.72	108	32.2	115
971	1122634	0	2	47	0	0	1	1	0	0	0	0	0	0	0	0	0	0	0	0	0	0	0	0	0	0	1	0	0	1	0	1	1	3	1	1	0	0	0	0	0	0	0	0	0	3.1	97	28.9	138
972	1193967	1	1	47	0	0	0	0	0	0	0	0	1	1	0	0	0	0	0	0	1	0	0	1	0	0	0	0	0	0	1	1	1	3	1	0	0	0	0	0	1	0	0	0	1	2.87	97	28	80
973	1197816	0	2	69	1	1	0	0	0	0	0	0	0	0	0	0	0	0	0	0	0	0	0	0	0	0	0	0	0	1	0	0	1	1	2	1	0	0	0	0	1	0	0	0	0	3.41	98	30.1	456
974	1212315	0	2	60	0	0	1	0	0	0	0	0	0	0	0	0	0	0	0	0	0	0	0	0	0	0	0	0	0	0	0	1	2	1	2	0	0	0	0	0	0	0	0	0	0	3.59	99	31.9	401
975	1190067	0	2	45	0	0	0	0	0	0	0	0	1	1	0	0	0	0	0	0	1	0	0	1	0	1	0	0	0	0	1	1	1	2	2	1	0	1	0	0	1	1	1	1	1	1.07	32	9.7	40
976	1189131	0	1	17	0	0	0	0	0	0	0	0	1	0	0	0	0	0	0	0	0	0	0	0	0	0	0	0	1	1	1	1	2	2	1	0	0	0	0	0	0	0	0	0	0	5.25	149	46.3	351
977	1202738	0	1	60	0	0	0	0	0	0	0	0	1	1	0	0	0	0	0	0	1	0	0	1	0	1	0	0	0	1	1	0	2	2	2	0	0	0	0	0	1	1	0	0	0	2.64	91	25.7	41
978	1213164	0	1	62	0	0	0	0	0	0	0	0	1	0	0	0	0	0	0	0	0	0	0	0	0	0	0	0	1	1	0	0	2	3	1	1	0	0	0	0	1	1	0	0	1	4.58	143	41.8	44
979	779640	0	2	69	1	0	0	0	0	0	0	0	1	1	0	0	0	0	0	0	0	0	0	0	0	0	0	0	0	1	0	0	2	1	2	1	0	0	0	0	0	1	0	0	0	3.64	124	35.9	54
980	1213877	0	1	53	0	0	0	0	0	0	0	0	0	0	0	0	0	0	0	0	0	0	0	0	0	0	0	0	0	1	1	1	1	1	1	0	0	0	0	0	0	0	0	0	0	3.18	96	26.3	85
981	1195693	0	1	47	0	0	0	0	0	0	0	0	0	0	0	0	0	0	0	0	1	0	0	1	0	0	0	0	0	1	0	0	1	2	2	0	0	1	0	0	1	0	0	0	0	3.87	124	36.7	89
982	1198541	1	1	39	0	0	0	0	0	0	0	0	1	1	0	0	0	0	0	0	1	0	0	1	0	0	0	0	0	0	1	1	1	1	1	0	0	0	0	0	1	0	0	0	0	5.6	98	30.1	75
983	1194216	1	1	15	0	0	0	0	0	0	0	0	0	0	0	0	0	0	0	0	0	0	0	0	0	1	0	0	1	0	0	0	2	3	1	1	0	1	1	1	1	1	0	0	1	3.26	101	31.2	35
984	1186214	1	1	51	0	1	1	0	1	1	0	0	1	0	0	0	0	0	0	0	0	0	0	0	0	0	0	0	0	1	0	0	1	1	1	1	1	1	1	1	0	1	0	0	1	4.74	134	46.5	31
985	1164002	1	1	60	0	1	0	0	0	0	0	1	0	0	0	0	0	0	0	0	0	0	0	0	0	1	0	0	1	1	1	1	1	3	2	1	0	0	1	1	1	1	0	0	1	4.07	127	37.7	44
986	1200201	0	2	57	0	0	1	0	0	0	0	0	0	0	0	0	0	0	0	0	1	0	0	1	0	1	0	0	0	1	0	0	4	3	1	1	0	1	0	0	0	0	0	0	0	3.53	166	31	135
987	1189953	0	1	51	0	0	0	0	0	0	0	0	1	0	0	0	0	0	0	0	0	0	0	0	0	0	0	0	0	1	1	0	1	3	1	0	0	0	0	0	0	0	0	0	0	3.45	112	35.1	62
988	1208655	0	1	63	0	0	1	1	0	0	0	0	0	0	0	0	0	0	0	0	1	0	0	1	0	0	0	0	0	0	0	0	4	3	1	0	0	0	0	0	1	0	0	0	1	4.1	122	34.6	82
989	1213432	0	1	46	0	1	0	0	0	0	0	0	0	0	0	0	0	0	0	0	0	0	0	0	0	0	0	0	1	1	1	0	2	3	1	0	0	0	1	0	0	0	0	1	1	3.59	111	30.1	88
990	1177153	0	2	52	0	1	0	0	0	0	0	0	0	0	0	0	0	0	0	0	0	0	0	0	0	1	0	0	0	0	1	1	3	1	2	0	0	0	0	0	0	0	0	0	0	2.36	67	20.6	307
991	1163700	1	2	63	0	0	0	0	0	0	0	0	0	0	1	0	0	0	0	0	0	0	0	0	0	0	1	0	0	1	0	1	1	1	2	0	1	0	1	1	0	0	0	1	1	2.38	75	23.3	158
992	1177462	0	1	50	0	0	0	0	0	0	0	0	1	0	0	0	1	0	0	0	0	0	0	1	0	1	0	0	0	0	0	1	1	3	2	1	0	0	0	0	0	1	0	1	1	2.92	87	28.5	49
993	1123423	1	1	59	0	0	0	0	0	0	0	0	1	1	0	0	0	0	0	0	0	0	0	0	0	0	0	0	0	1	1	1	1	2	1	1	0	1	0	1	1	1	0	0	1	2.76	91	29.9	17
994	1180401	0	1	68	1	0	0	0	0	0	0	1	0	0	0	0	0	0	0	0	0	0	0	0	0	1	0	0	0	0	0	0	1	1	2	1	0	0	0	0	0	0	0	0	0	4.1	127	37.8	86
995	1167721	0	1	78	1	0	1	1	0	0	1	0	1	1	0	0	0	0	0	1	1	1	0	1	0	0	0	0	0	1	1	1	1	3	2	1	0	1	1	0	1	0	1	1	1	2.65	76	24.2	129
996	1170997	1	1	78	1	1	1	0	0	0	0	0	0	0	0	0	0	0	0	0	0	0	0	0	0	0	1	0	0	0	0	0	1	2	2	1	0	1	1	1	0	0	0	1	1	4.4	116	38.1	208
997	1173729	0	1	67	1	1	0	0	0	0	0	1	1	1	0	0	0	0	0	0	0	0	0	0	0	0	0	0	0	1	1	0	1	3	1	1	0	0	0	0	1	1	0	0	1	3.44	113	33.8	42
998	874801	0	1	84	1	1	1	1	0	1	0	1	0	0	0	0	0	0	0	0	0	0	0	0	0	0	0	1	0	1	0	1	2	3	2	1	1	0	0	0	0	0	0	0	1	3.25	104	30.5	158
999	1164763	1	2	86	1	1	0	0	1	1	0	0	0	0	0	0	0	0	0	0	1	1	0	1	0	1	0	0	0	0	1	1	1	2	2	1	1	0	1	1	1	0	0	1	1	3.06	94	30	268
1000	1161606	1	1	68	1	1	1	0	0	0	0	1	1	0	0	0	0	0	0	0	0	0	0	0	0	0	0	0	0	0	0	1	1	3	2	1	0	1	1	1	0	0	0	1	1	3.96	96	31.6	199
1001	1159432	0	1	63	0	0	0	0	1	0	0	0	0	0	0	0	0	0	0	0	0	0	0	0	0	0	1	0	0	0	1	1	1	3	2	0	0	1	1	1	1	0	0	1	1	3.39	93	36.3	117
1002	1180561	0	2	40	0	0	1	0	0	0	0	0	0	0	0	0	0	0	0	0	0	0	0	0	0	0	0	0	0	1	0	0	1	1	1	0	0	0	0	0	0	0	0	0	0	5.03	154	14.1	148
1003	1180387	0	1	78	1	1	0	0	0	0	0	0	1	1	0	0	0	0	0	0	0	0	0	0	0	0	0	0	0	1	1	1	1	1	1	1	0	0	0	0	0	1	1	0	0	2.44	74	22.8	40
1004	1180006	0	1	75	1	1	1	1	0	0	0	0	0	0	0	0	0	0	0	0	0	0	0	0	0	0	0	0	0	1	1	0	3	3	1	1	0	0	0	0	0	0	0	0	0	3.42	108	32.7	142
1005	1179543	0	2	45	0	0	0	0	0	0	0	0	0	0	0	0	0	0	0	0	0	0	0	0	0	0	0	0	0	1	0	1	3	3	1	1	0	0	0	0	0	0	0	0	0	3.31	88	27.7	525
1006	1179325	1	2	67	1	0	0	0	0	0	0	0	0	0	0	0	0	0	0	0	1	0	0	1	0	1	0	0	0	0	0	1	1	1	2	0	0	0	0	0	0	0	0	0	0	3.56	78	24.3	191
1007	1179320	0	1	31	0	0	0	0	0	0	0	0	1	0	0	0	0	0	0	0	0	0	0	0	0	0	0	0	0	0	0	0	4	3	1	0	0	0	0	0	0	0	0	0	0	3.27	105	30.2	227
1008	1179290	0	1	51	0	0	0	0	0	0	0	0	1	0	0	0	0	0	0	0	1	0	0	1	0	1	0	0	0	0	0	0	1	1	2	0	0	0	0	0	0	0	0	0	0	5.56	164	49.2	199
1009	1179209	0	2	58	0	0	0	0	0	0	0	0	1	0	0	0	0	0	0	0	1	0	0	1	0	1	0	0	0	1	0	0	1	1	2	0	0	0	0	0	0	0	0	0	0	5.56	164	49.2	199
1010	1178988	1	1	50	0	0	0	0	0	0	0	0	0	0	0	0	0	0	0	0	1	0	0	1	0	0	0	0	0	1	0	0	1	1	1	0	0	0	0	0	0	0	0	0	0	4.29	123	38.1	145
1011	1178898	0	1	71	1	1	0	0	0	0	0	0	0	0	0	0	0	0	0	0	0	0	0	0	0	0	1	0	0	0	1	0	1	3	2	0	0	1	0	0	0	0	0	0	0	4.59	141	43	280
1012	1178636	0	2	53	0	0	0	0	0	0	0	0	0	0	0	0	0	0	0	0	0	0	1	0	0	0	0	0	0	0	0	0	4	1	2	0	0	0	0	0	0	0	0	0	0	3.55	98	29.4	318
1013	1178596	0	2	46	0	0	1	0	0	0	0	0	0	0	0	0	0	0	0	0	0	0	0	0	0	0	0	0	1	1	1	1	3	1	1	0	0	0	0	0	0	0	0	0	0	2.18	71	20.5	152
1014	1178569	1	1	66	1	1	0	0	0	1	0	1	0	0	0	0	0	0	0	0	0	0	0	0	0	1	0	0	0	1	0	0	1	1	1	0	0	0	1	0	0	0	0	0	0	1.63	51	18.7	365
1015	1178463	1	1	72	1	1	0	0	0	0	0	0	0	0	0	0	0	0	0	0	0	0	0	0	0	0	0	0	1	1	1	1	1	3	1	1	0	1	0	0	0	0	0	1	0	3.13	104	31.5	113
1016	1178379	0	2	57	0	0	0	0	0	0	0	0	0	0	0	0	0	0	0	0	0	0	0	0	0	1	0	0	0	0	0	0	1	1	2	0	0	0	0	0	0	0	0	0	0	9.8	109	33.8	191
1017	1178212	1	1	73	1	1	0	0	0	0	1	0	0	0	0	0	0	0	0	0	0	0	0	0	0	0	0	0	0	0	1	1	1	2	1	1	0	0	0	0	0	0	0	0	0	2.54	79	24.6	186
1018	1178193	0	2	42	0	0	0	0	0	0	0	0	0	0	0	0	0	0	0	0	0	0	0	0	0	1	0	0	0	1	0	0	3	1	1	1	0	0	0	0	0	0	0	0	0	3.29	94	28.9	122
1019	1178141	0	1	59	0	0	0	0	0	0	0	0	0	0	0	0	0	0	0	0	1	0	0	1	0	1	0	0	0	0	0	0	1	1	2	0	0	0	0	0	0	0	0	0	0	5.56	164	49.2	199
1020	1177951	1	1	61	0	0	0	0	0	0	0	0	0	0	0	0	0	0	0	0	0	0	0	0	0	0	1	0	0	1	0	0	1	2	1	0	0	0	0	0	0	0	0	0	0	3.25	101	28.4	281
1021	1177784	0	1	49	0	0	0	0	0	0	0	0	0	0	0	0	0	0	0	0	1	0	0	1	0	1	0	0	0	0	0	0	1	1	2	0	0	0	0	0	0	0	0	0	0	3.87	130	39.9	166
1022	1177780	1	1	53	0	0	1	0	0	1	0	0	0	0	0	0	0	0	0	0	0	0	0	0	1	1	0	0	0	1	0	0	1	1	2	1	1	0	0	1	0	0	0	0	0	3.62	107	32.3	221
1023	1177730	1	2	26	0	0	0	0	0	0	0	0	0	0	0	0	0	0	0	0	0	0	0	0	0	1	0	0	0	0	0	0	1	1	2	1	0	0	0	0	0	0	0	0	0	3.89	104	32.7	170
1024	1177628	0	1	49	0	0	0	0	0	0	0	0	0	0	0	0	0	0	0	0	1	0	0	1	0	0	0	0	0	1	1	0	3	1	1	1	0	0	0	0	1	0	0	0	0	4.65	138	41.5	328
1025	1177580	1	1	61	0	1	0	0	0	0	0	1	0	0	0	0	0	0	0	0	0	0	0	0	0	0	0	0	0	0	1	0	1	1	1	1	0	1	1	1	1	1	0	1	0	2.8	101	26.9	15
1026	1177518	0	1	63	0	1	1	0	0	0	0	1	1	0	0	0	0	0	0	0	0	0	0	0	0	0	0	0	1	1	0	0	2	3	1	0	1	0	1	0	1	0	0	1	0	4.94	134	42.6	65
1027	1177461	0	1	67	1	0	0	0	0	0	0	0	0	0	0	0	0	0	0	0	1	0	0	1	0	1	0	0	0	0	0	0	1	1	2	0	0	0	0	0	0	0	0	0	0	3.78	109	32.5	146
1028	1177424	0	1	76	1	0	0	0	0	0	0	0	0	0	0	0	0	0	0	0	1	0	0	1	0	1	0	0	0	0	0	0	1	2	2	0	0	0	0	0	0	0	0	0	0	4.42	134	40.7	265
1029	1177420	1	2	64	0	0	0	0	0	1	0	0	0	0	0	0	0	0	0	0	1	0	0	1	1	1	0	0	0	0	1	1	1	1	2	0	1	0	0	0	0	1	0	0	0	2.38	68	21.8	43
1030	1177271	0	1	31	0	0	0	0	0	0	0	0	0	0	0	0	0	0	0	0	1	0	0	1	0	1	0	0	0	0	0	0	1	1	2	0	0	0	0	0	0	0	0	0	0	4.32	126	38.9	187
1031	1177268	0	2	35	0	0	0	0	0	0	0	0	0	0	0	0	0	0	0	0	0	0	0	0	0	0	0	0	0	1	1	1	2	3	1	1	0	0	1	1	0	0	0	1	0	2.7	79	25.5	253
1032	1177157	0	2	59	0	1	1	0	0	0	0	0	0	0	0	0	0	0	0	0	0	0	0	0	0	1	0	0	0	1	0	0	3	3	2	1	0	0	0	0	0	0	0	0	0	4.16	121	37.1	151
1033	1177136	1	1	82	1	1	0	0	0	0	0	1	0	0	0	0	0	0	0	0	0	0	0	0	0	0	0	0	0	1	0	1	4	3	1	1	0	1	1	1	0	0	0	0	0	3.04	98	31.2	105
1034	1177109	1	1	64	0	0	0	0	0	0	0	0	1	0	0	0	0	0	0	0	1	0	0	1	0	0	0	0	0	0	0	1	1	1	1	0	0	0	0	0	0	0	0	0	0	3.15	77	23.8	158
1035	1177037	1	2	49	0	0	0	0	0	1	0	0	0	0	0	0	0	0	0	0	0	0	0	0	1	1	0	0	0	1	0	0	1	2	2	0	1	1	0	1	1	0	0	0	0	3.97	114	37	172
1036	1176862	1	1	78	1	0	0	0	1	0	0	0	1	1	0	0	0	0	0	0	0	0	0	0	0	0	0	0	0	1	0	0	1	3	2	1	1	0	0	1	1	0	0	0	0	3.89	121	37.9	78
1037	1176758	0	1	58	0	0	0	0	0	0	0	0	0	0	0	0	0	0	0	0	0	0	0	0	0	1	0	0	0	0	0	0	1	2	2	0	0	0	0	0	0	0	0	0	0	4.1	123	38.2	271
1038	1176106	0	2	66	1	1	1	1	0	0	0	0	0	0	0	0	0	0	0	0	0	0	0	0	0	0	0	1	0	1	0	1	2	3	1	0	0	0	0	0	0	0	0	0	0	2.79	83	26	174
1039	1175997	0	2	50	0	0	0	0	0	0	0	0	0	0	0	0	0	0	0	0	0	0	0	0	1	1	0	0	0	0	0	1	1	1	2	0	0	0	0	0	0	0	0	0	0	4.77	82	31.5	82
1040	1175966	0	1	25	0	0	0	0	0	0	0	0	0	0	0	0	0	0	0	0	0	0	0	0	0	0	0	0	0	0	0	0	2	3	2	1	0	0	0	0	0	0	0	0	0	4.58	134	41.3	202
1041	1175606	0	2	46	0	1	0	0	0	0	0	0	0	0	0	0	0	0	0	0	1	0	0	1	0	1	0	0	0	0	0	0	1	1	2	0	0	0	0	0	0	0	0	0	0	3.55	107	32.9	200
1042	1175596	0	1	58	0	1	0	0	0	0	0	1	0	0	0	0	0	0	0	0	0	0	0	0	0	0	0	0	0	0	0	0	1	1	1	0	0	0	0	0	0	0	0	0	0	4.42	132	39.1	178
1043	1175562	1	1	71	1	1	1	0	0	1	0	0	0	0	0	0	0	0	0	0	0	0	0	0	0	0	0	0	0	1	0	0	1	2	1	0	1	0	0	0	0	0	0	0	0	4.17	128	39.6	224
1044	1175498	1	1	33	0	0	0	0	0	0	0	0	0	0	0	0	0	0	0	0	0	0	0	0	0	0	0	0	1	0	0	1	1	2	1	1	0	1	0	1	1	0	0	1	0	3.24	95	28.7	137
1045	1175482	0	1	41	0	1	0	0	0	0	0	1	0	0	0	0	0	0	0	0	0	0	0	0	0	1	0	0	0	0	0	0	1	1	2	0	0	0	0	0	0	0	0	1	0	4.02	116	35.2	137
1046	1175398	0	1	60	0	0	1	0	0	0	0	0	0	0	0	0	0	0	0	0	0	0	0	0	0	0	0	0	0	0	0	0	1	2	1	0	0	0	0	0	0	0	0	0	0	4.22	127	34.9	191
1047	1175394	1	2	49	0	0	1	0	0	0	0	0	0	0	0	0	0	0	0	0	0	0	0	0	0	1	0	0	0	1	0	1	1	1	2	1	0	0	0	0	0	0	0	0	0	3.99	97	31	400
1048	1175330	1	1	55	0	1	1	0	0	0	0	1	0	0	0	0	0	0	0	0	0	0	0	0	0	0	0	0	0	0	0	0	1	1	1	0	0	0	0	0	0	0	1	1	0	3.41	101	29.9	396
1049	1175275	0	1	54	0	0	1	0	1	1	0	0	0	0	0	0	0	0	0	0	0	0	0	0	0	1	0	0	0	1	0	0	1	3	2	0	1	0	0	0	0	0	0	0	0	2.85	77	26.4	196
1050	1175272	0	1	39	0	0	0	0	0	0	0	0	0	0	0	0	0	0	0	0	0	0	0	0	0	0	0	0	0	1	0	0	2	3	1	0	0	0	0	0	0	0	0	0	0	9.2	128	38.6	313
1051	1175059	1	2	57	0	0	1	0	0	0	0	0	0	0	0	0	0	0	0	0	0	0	0	0	1	1	0	0	0	0	0	0	1	2	2	0	0	0	0	0	1	0	0	0	0	4.9	123	41.7	187
1052	1175014	0	1	50	0	1	0	0	0	0	1	1	0	0	0	0	0	0	0	0	0	0	0	0	0	0	0	0	0	1	0	0	1	1	1	0	0	0	0	0	0	0	0	0	0	4.69	140	41.8	232
1053	1174908	0	1	64	0	1	1	0	0	0	0	0	1	0	0	0	0	0	0	0	1	0	0	1	0	1	0	0	0	0	0	0	2	1	2	0	0	0	0	0	1	0	0	0	0	3.95	129	36.8	161
1054	1174806	0	1	45	0	0	0	0	0	0	0	0	0	0	0	0	0	0	0	0	0	0	0	0	0	0	1	0	1	1	0	0	1	2	1	0	0	1	0	0	1	0	0	0	0	3.64	106	33.3	285
1055	1174386	1	2	25	0	0	0	0	0	0	0	0	1	0	0	0	0	0	0	0	0	0	0	0	0	1	1	0	0	1	1	1	1	3	1	1	0	0	0	1	1	0	0	0	0	3.15	94	28.2	165
1056	1174126	0	1	63	0	0	0	0	1	0	0	0	0	0	0	0	0	0	0	0	0	0	0	0	0	0	0	0	0	0	0	0	1	1	1	1	1	0	0	0	0	0	0	0	0	4.55	141	43.6	195
1057	1174051	0	1	38	0	1	0	0	0	0	0	0	0	0	0	0	0	0	0	0	0	0	0	0	0	0	0	0	0	1	0	1	2	3	1	1	0	0	0	0	0	0	1	0	0	5.06	147	42.9	200
1058	1174014	1	1	61	0	0	0	0	0	0	0	0	1	0	0	0	0	0	0	0	1	0	0	1	0	1	0	0	0	0	0	0	2	3	2	1	0	0	1	1	1	0	0	1	0	4.03	116	38.5	111
1059	1173975	0	2	42	0	0	0	0	0	0	0	0	0	0	0	0	0	0	0	0	0	0	0	0	0	0	0	0	0	0	0	0	2	1	2	0	0	0	0	0	0	0	0	0	0	4.21	118	36.3	396
1060	1173924	0	2	72	1	0	0	0	0	0	0	0	0	0	0	0	0	0	0	0	1	0	0	1	0	1	0	0	0	0	0	1	1	1	2	0	0	0	0	0	0	0	0	0	0	2.51	66	21.6	296
1061	1173904	0	2	68	1	1	0	0	0	0	0	0	0	0	0	0	0	0	0	0	0	0	0	0	0	0	0	0	0	1	0	0	1	3	1	1	0	0	0	0	0	0	1	0	0	3.62	110	34.2	160
1062	1173612	1	1	36	0	0	0	0	0	0	0	0	0	0	0	0	1	0	0	0	0	0	0	1	0	0	0	0	0	1	1	1	4	2	1	0	0	0	0	1	1	1	0	0	0	2.66	74	22.5	27
1063	1173547	0	2	50	0	0	0	0	0	0	0	0	1	0	0	0	0	0	0	0	1	1	0	1	0	0	0	0	0	0	0	0	4	1	1	0	0	0	0	1	1	0	0	0	0	4.21	120	36	346
1064	1173492	1	2	38	0	0	0	0	0	0	0	0	0	0	0	0	0	0	0	0	0	0	0	0	0	1	1	0	0	0	1	0	1	1	2	0	0	0	0	0	0	0	0	0	0	4.26	113	36.1	699
1065	1173377	1	2	78	1	1	1	0	1	1	0	0	1	0	0	0	0	0	0	0	0	0	0	0	0	1	0	0	0	1	0	1	1	1	2	0	1	1	0	0	1	0	1	1	0	3.5	78	28.7	77
1066	1173371	0	2	45	0	0	0	0	0	0	0	0	0	0	0	0	0	0	0	0	0	0	0	0	0	1	0	0	0	0	0	0	1	1	2	0	0	0	0	0	0	0	0	0	0	4.13	123	37.2	162
1067	1173200	0	2	23	0	0	0	0	0	1	0	0	0	0	0	0	0	0	0	0	0	0	0	0	0	0	0	0	0	1	1	0	2	3	2	0	1	0	0	0	0	0	0	0	0	3.96	108	34.1	420
1068	1172863	0	1	60	0	1	0	0	0	0	0	0	0	0	0	0	0	0	0	0	0	0	0	0	0	0	0	0	0	0	1	1	1	1	1	0	0	1	0	0	1	0	0	0	0	2.77	83	28.7	86
1069	1172750	1	1	48	0	0	0	0	0	1	0	0	0	0	0	0	0	0	0	0	0	0	0	0	1	1	0	0	0	1	0	0	1	3	2	0	1	1	1	1	0	0	0	0	0	3.49	99	31.2	120
1070	1172589	0	2	72	1	1	1	0	1	1	0	0	0	0	0	0	0	0	0	0	0	0	0	0	0	0	0	0	0	1	1	0	1	2	1	0	1	0	0	0	0	0	0	0	0	4.09	122	37.8	132
1071	1172499	1	1	38	0	0	0	0	0	0	0	0	0	0	0	0	0	0	0	0	0	0	0	0	0	0	0	0	999	1	0	0	3	3	1	1	0	0	0	0	0	0	0	0	0	4.05	118	35.6	147
1072	1172371	1	1	66	1	0	0	0	0	0	0	0	0	0	0	0	0	0	0	0	0	0	0	0	0	0	0	0	0	0	0	1	1	1	1	0	0	0	0	0	0	1	0	0	0	2.59	80	24.6	56
1073	1172325	1	1	37	0	0	0	0	0	0	0	0	0	0	0	0	0	0	0	0	0	0	0	0	0	0	0	0	0	1	0	0	1	1	1	1	0	0	0	0	0	0	0	1	0	5.14	154	47.7	344
1074	1172283	0	2	58	0	1	0	0	0	0	0	0	0	0	0	0	0	0	0	0	0	0	0	0	0	0	0	0	0	0	0	0	3	1	1	0	0	0	0	0	0	0	0	0	0	4.64	131	40.7	197
1075	1172255	0	1	66	1	0	0	0	0	1	0	0	0	0	0	0	0	0	0	0	0	0	0	0	0	0	0	0	0	1	0	0	1	2	1	0	1	0	0	0	0	0	0	0	0	5.53	167	52	192
1076	1172205	0	1	57	0	1	0	0	0	0	0	1	0	0	0	0	0	0	0	0	0	0	0	0	0	0	0	0	0	1	0	0	3	3	1	1	0	0	0	0	0	0	0	0	0	4.22	122	37.7	190
1077	1172169	0	2	46	0	0	0	0	0	0	0	0	0	0	0	0	0	0	0	0	1	0	0	1	0	0	0	0	0	1	0	0	4	3	1	0	0	0	0	0	0	0	0	0	0	6.2	113	33.3	113
1078	1172118	0	2	27	0	0	0	0	0	0	0	0	1	0	0	0	0	0	0	0	0	0	0	0	0	1	0	0	1	1	1	1	1	2	1	0	0	0	0	0	1	0	0	0	0	2.46	64	19.5	62
1079	1172095	1	1	52	0	0	0	0	0	0	0	0	0	0	0	0	0	0	0	0	1	0	0	1	0	1	0	0	0	0	0	0	1	1	2	0	0	0	0	0	0	0	0	0	0	3.32	104	31.8	203
1080	1172071	0	2	41	0	0	0	0	0	0	0	0	0	0	0	0	0	0	0	0	0	0	0	0	0	1	0	0	0	1	0	1	1	1	2	0	0	0	0	0	0	0	0	0	0	3.19	95	28.5	187
1081	1171701	0	1	58	0	1	0	0	0	0	1	0	0	0	0	0	0	0	0	0	0	0	0	0	1	1	0	0	0	0	0	1	1	1	2	0	0	0	0	1	0	0	0	0	0	3.37	104	33.1	93
1082	1171628	1	2	46	0	0	0	0	0	0	0	0	0	0	0	0	0	0	0	0	0	0	0	0	1	1	0	0	0	1	0	0	1	3	2	0	1	1	0	1	1	1	0	1	0	2.65	87	25.5	36
1083	1171602	1	2	63	0	0	0	0	0	0	0	0	1	0	0	0	0	0	0	0	0	0	0	0	0	0	1	0	0	1	0	0	3	3	1	1	0	0	1	0	0	0	0	0	0	3.65	103	31.4	64
1084	1171393	0	1	57	0	0	0	0	0	0	1	0	0	0	0	0	0	0	0	0	0	0	0	0	0	0	0	0	0	0	0	1	1	2	1	0	0	0	0	0	1	0	0	0	0	1.9	62	18.9	65
1085	1171388	0	2	67	1	1	0	0	0	0	0	0	0	0	0	0	0	0	0	0	0	0	0	0	0	0	0	0	0	1	1	0	1	2	1	1	0	0	0	0	0	0	0	0	0	2.47	70	21.8	280
1086	1171361	0	1	66	1	1	1	1	0	0	0	0	0	0	0	0	0	0	0	0	0	0	0	0	0	0	0	0	0	0	0	0	2	3	2	1	0	0	0	0	0	0	0	0	0	3.06	96	28.3	287
1087	1171319	0	1	50	0	0	0	0	0	0	0	0	0	0	0	0	0	0	0	0	0	0	0	0	0	0	0	0	0	0	0	0	3	1	1	0	0	0	0	0	0	0	0	0	0	5.3	155	48.4	178
1088	1171240	0	1	56	0	0	0	0	0	0	0	1	0	0	0	0	0	0	0	0	0	0	1	0	0	0	0	0	0	0	0	0	4	1	1	0	0	0	0	0	0	0	0	0	0	4.01	119	37	245
1089	1171234	1	1	62	0	1	0	0	0	0	0	1	0	0	0	0	0	0	0	0	0	0	0	0	0	0	0	0	0	0	0	1	3	3	1	0	0	0	0	0	0	0	0	0	0	8.2	99	30.5	131
1090	1171213	0	1	52	0	0	0	0	0	1	1	1	0	0	0	0	0	0	0	0	0	0	0	0	0	0	0	0	0	0	0	0	1	3	2	0	1	0	0	0	1	0	0	0	0	4.8	136	42.9	176
1091	1171030	1	1	87	1	0	0	0	0	0	0	0	0	0	0	0	0	0	0	0	0	0	0	0	0	0	0	0	0	1	1	1	1	1	1	0	0	0	0	0	0	0	0	0	0	2.56	86	26.3	107
1092	1171010	0	1	49	0	0	0	0	0	0	0	0	1	1	0	0	0	0	0	0	1	0	0	1	0	1	0	0	0	0	0	0	1	1	2	0	0	0	0	0	1	0	0	0	0	4.04	130	39.5	77
1093	1171004	0	1	15	0	0	0	0	0	0	0	0	1	0	0	0	0	0	0	0	1	0	0	1	0	1	0	0	0	0	0	0	2	2	2	0	0	0	0	0	0	0	0	0	0	4.05	118	35	162
1094	1170737	0	1	27	0	0	0	0	0	0	0	0	0	0	0	0	0	0	0	0	1	0	0	1	0	1	0	0	0	1	0	0	1	1	2	0	0	0	0	0	0	0	0	0	0	5.32	159	48.3	221
1095	1170727	1	2	47	0	0	0	0	0	1	0	0	0	0	0	0	0	0	0	0	0	0	0	0	1	1	0	0	0	0	0	0	1	1	2	0	1	0	0	0	0	0	0	0	0	3.29	95	29.5	264
1096	1170702	0	1	73	1	1	0	0	0	1	0	0	0	0	0	0	0	0	0	0	0	0	0	0	0	0	0	0	0	0	0	1	1	2	2	0	1	0	0	0	0	0	0	0	0	2.5	77	24.6	275
1097	1170612	1	2	30	0	0	0	0	0	0	0	0	0	0	0	0	0	0	0	0	0	0	0	0	0	1	0	0	0	1	1	1	1	1	1	1	0	1	0	1	1	0	0	1	0	2.51	54	18.3	277
1098	1170602	1	1	66	1	0	1	1	0	0	0	0	0	0	0	0	0	0	0	0	1	0	0	1	0	0	1	0	0	0	1	1	1	2	2	0	0	1	1	1	0	0	0	0	0	3.75	98	32.6	206
1099	1170324	0	1	17	0	0	1	0	0	0	0	0	0	0	0	1	0	0	0	0	0	0	0	1	0	0	0	0	0	1	0	1	1	1	2	1	0	0	0	0	0	1	0	0	0	1.69	53	15.8	19
1100	1170192	1	1	75	1	1	0	0	0	0	0	1	0	0	0	0	0	0	0	1	0	0	0	0	0	0	0	0	0	1	1	0	1	2	2	1	0	0	1	1	0	0	0	0	0	3.25	96	28.7	202
1101	1170182	1	2	56	0	1	1	0	0	1	0	0	0	0	0	0	0	0	0	0	0	0	0	0	1	1	0	0	0	1	0	1	1	1	2	0	1	0	0	0	0	0	0	0	0	3.14	87	27.6	161
1102	1170166	1	2	21	0	0	0	0	0	0	0	0	0	0	0	0	0	0	0	0	0	0	0	0	1	1	0	0	0	0	0	1	1	1	2	0	0	0	0	0	0	0	0	0	0	2.78	81	26.4	147
1103	1170102	0	1	60	0	0	0	0	0	0	0	0	0	0	0	0	0	0	0	0	1	0	0	1	0	0	0	0	0	0	0	0	4	2	1	0	0	0	0	0	0	0	0	0	0	4.32	135	40.6	215
1104	1169711	1	1	49	0	0	0	0	0	0	0	0	0	0	0	0	0	0	0	0	1	0	0	1	0	0	0	0	0	0	0	0	4	1	1	0	0	0	0	0	0	0	0	0	0	4.69	156	45.9	236
1105	1169710	0	2	77	1	1	0	0	0	1	0	0	0	0	1	0	0	0	0	0	1	0	0	1	0	0	0	0	0	1	0	0	3	3	2	1	1	0	0	0	0	0	1	1	0	4.35	130	40.7	85
1106	1169705	0	1	64	0	1	1	0	0	0	0	0	1	1	0	0	0	0	0	0	1	0	0	1	0	0	0	0	0	0	0	0	4	1	2	0	0	0	0	0	0	1	0	0	0	4.11	126	37.7	34
1107	1169694	1	2	45	0	0	0	0	0	0	0	0	0	0	0	0	0	0	0	0	1	0	0	1	0	0	0	0	0	0	0	0	4	2	1	0	0	0	0	0	0	0	0	1	0	3.07	104	30.9	197
1108	1169655	1	2	21	0	0	0	0	0	0	0	0	0	0	0	0	0	0	0	0	0	0	0	0	0	0	0	0	0	0	0	0	1	2	1	0	0	0	0	0	1	0	0	0	0	3.94	100	31.2	121
1109	1169620	1	2	65	1	0	0	0	0	0	0	1	0	0	0	0	0	0	0	0	0	0	0	0	0	0	0	0	0	1	0	1	2	1	1	1	0	0	0	0	0	0	0	1	0	3.16	90	31.9	138
1110	1169595	0	1	59	0	0	0	0	0	0	1	0	0	0	1	0	0	0	0	0	0	0	0	0	0	0	0	0	0	0	0	1	2	3	2	0	0	0	0	0	0	0	0	0	0	2.62	73	23.7	480
1111	1169558	0	2	37	0	0	0	0	0	0	0	0	0	0	0	0	0	0	0	0	1	0	0	1	0	1	0	0	0	0	0	0	1	1	2	0	0	0	0	0	0	0	0	0	0	4.27	131	41.3	112
1112	1169425	0	1	51	0	0	0	0	0	1	1	0	0	0	0	0	0	0	0	0	0	0	0	0	0	0	0	0	0	0	0	0	2	1	1	0	1	0	0	0	0	0	0	0	0	4.66	151	43.2	181
1113	1169420	0	1	78	1	1	1	1	0	1	0	0	1	0	0	0	0	0	0	0	0	0	0	0	0	0	0	0	1	1	0	0	2	2	2	1	1	0	0	1	0	0	0	0	0	3.12	98	29.4	254
1114	1169405	0	1	76	1	0	0	0	0	0	0	0	0	0	0	0	0	0	0	0	0	0	0	0	0	1	0	0	0	1	0	1	1	1	1	0	0	0	0	1	0	0	1	0	0	1.72	56	18.7	199
1115	1169381	0	1	49	0	1	0	0	0	0	0	0	1	1	0	0	0	0	0	0	0	0	1	0	0	0	0	0	0	1	0	0	1	2	2	1	0	0	0	0	1	0	0	0	0	4.11	135	43	118
1116	1169244	1	1	39	0	0	0	0	0	0	0	1	0	0	0	0	0	0	0	0	0	0	0	0	0	0	0	0	0	0	0	1	1	1	1	1	0	0	0	0	0	0	0	1	0	2.87	86	26.7	258
1117	1169236	0	2	50	0	0	0	0	0	0	0	0	1	1	0	0	0	0	0	0	0	0	0	0	0	0	0	0	0	0	1	1	1	1	1	1	0	0	0	0	1	1	0	1	0	3.01	94	27.5	35
1118	1169173	1	1	37	0	0	0	0	0	1	0	0	0	0	0	0	0	0	0	0	0	0	0	0	1	1	0	0	0	1	0	1	1	2	2	1	1	0	0	0	0	0	0	0	0	2.85	89	26.7	180
1119	1169138	0	2	63	0	1	0	0	0	0	0	1	0	0	0	0	0	0	0	0	0	0	0	0	0	1	0	0	0	0	0	0	1	3	2	0	0	0	0	0	0	0	0	1	0	3	83	26.9	262
1120	1169115	0	1	28	0	0	0	0	0	0	0	0	1	0	0	1	1	0	0	0	0	0	0	1	0	0	0	0	0	1	0	1	2	3	1	1	0	0	0	0	0	1	0	0	0	2.23	63	20.6	59
1121	1169092	1	1	26	0	0	0	0	0	0	1	0	1	0	0	0	0	0	0	0	0	0	0	0	0	0	0	0	0	1	1	1	1	2	1	0	0	0	0	1	1	1	0	1	0	2.55	76	23.5	45
1122	1169070	0	2	57	0	1	1	1	0	1	0	0	0	0	0	0	0	0	0	0	0	0	0	0	0	0	0	0	0	1	1	1	1	3	2	0	1	0	0	0	0	0	0	0	0	2.42	78	25.3	139
1123	1169066	1	2	29	0	0	0	0	0	1	0	0	0	0	0	0	0	0	0	0	0	0	0	0	0	1	0	0	1	1	1	0	1	1	2	1	1	0	0	0	0	0	0	0	0	4.37	124	38.3	255
1124	1169006	0	1	71	1	1	0	0	0	0	0	0	0	0	0	0	0	0	0	0	0	0	0	0	0	0	0	0	1	1	0	0	2	3	2	1	0	0	0	0	1	1	0	1	0	3.76	119	37.2	49
1125	1168864	1	2	49	0	0	0	0	0	0	0	0	0	0	0	0	0	0	0	0	1	0	0	1	0	1	0	0	0	0	0	0	1	1	2	0	0	0	0	0	0	0	0	0	0	2.46	74	22.8	92
1126	1168590	0	1	44	0	1	0	0	0	0	0	1	0	0	0	0	0	0	0	0	0	0	0	0	0	1	0	0	0	0	0	0	2	1	2	0	0	0	0	0	0	0	0	0	0	3.56	114	32.2	207
1127	1168461	0	2	49	0	0	0	0	0	0	0	0	0	0	0	0	0	0	0	0	1	0	0	1	0	1	0	0	0	1	0	0	1	3	2	1	0	0	0	0	0	0	0	0	0	2.97	91	30.6	145
1128	1168403	0	1	45	0	1	0	0	0	0	0	0	0	0	0	0	0	0	0	0	0	0	0	0	0	0	0	0	0	1	1	1	2	3	1	0	0	0	0	0	0	0	0	0	0	2.99	88	26.9	100
1129	1168338	0	2	61	0	0	1	1	0	1	1	0	0	0	0	0	0	0	0	0	0	0	0	0	0	0	0	1	0	1	0	0	1	2	2	0	1	0	0	1	0	0	0	0	0	4.07	104	34	184
1130	1168326	0	1	41	0	1	0	0	0	1	0	0	0	0	0	0	0	0	0	0	0	0	0	0	0	1	0	0	0	0	0	0	2	2	2	0	1	0	0	0	0	0	0	0	0	4.52	118	41	224
1131	1168293	1	1	66	1	0	0	0	0	0	0	0	1	0	0	0	0	0	0	0	1	0	0	1	0	1	0	0	0	0	0	0	1	1	2	0	0	0	0	0	1	0	0	0	0	3.31	105	32.1	187
1132	1168212	0	2	67	1	0	0	0	0	0	0	0	0	0	0	0	0	0	0	0	1	0	0	1	0	0	0	0	0	1	0	0	2	2	2	0	0	0	0	0	0	0	0	0	0	3.21	93	28.2	166
1133	1168140	0	2	51	0	0	0	0	0	0	0	0	0	0	0	0	0	0	0	0	1	0	0	1	0	1	0	0	0	1	0	0	1	3	2	1	0	0	0	0	0	0	0	0	0	3.47	103	30.6	179
1134	1168096	0	1	75	1	1	0	0	0	0	0	0	0	0	0	0	0	0	0	1	0	0	0	0	0	0	0	0	0	0	0	1	1	1	2	0	0	0	1	1	0	0	0	0	0	2.31	71	22.8	167
1135	1167736	1	1	29	0	0	0	0	0	1	0	0	0	0	0	0	0	0	0	0	0	0	0	0	1	1	0	0	0	0	0	0	1	2	2	0	1	0	0	0	0	0	0	0	0	3.58	114	34.8	128
1136	1167735	0	2	65	1	0	0	0	0	1	0	0	1	0	0	0	0	0	0	0	0	0	0	0	1	1	0	0	0	1	0	0	2	2	2	0	1	0	0	0	0	0	0	0	0	3.48	102	31.8	222
1137	1167709	1	2	64	0	1	0	0	0	0	0	0	1	1	0	0	0	0	0	0	1	0	0	1	0	1	1	0	0	0	0	0	1	2	2	1	0	1	1	1	1	1	0	0	0	1.94	64	20.1	53
1138	1167584	0	2	48	0	0	0	0	0	0	0	0	0	0	0	0	0	0	0	0	0	0	0	0	0	0	0	0	1	1	0	1	3	3	1	1	0	0	0	0	0	0	0	0	0	2.21	72	20.7	112
1139	1167558	0	2	27	0	0	0	0	0	0	0	0	0	0	0	0	0	0	0	0	0	0	0	0	0	1	1	0	0	1	0	0	1	3	2	0	0	0	0	0	0	1	0	0	0	3.48	102	32.8	35
1140	1167550	1	1	55	0	0	0	0	0	0	0	1	0	0	0	0	0	0	0	0	0	0	0	0	0	0	0	0	0	1	0	0	1	1	1	0	0	0	0	1	0	0	0	1	0	4.37	124	38.9	156
1141	1167542	1	1	65	1	0	0	0	0	0	0	0	1	1	0	0	0	0	0	1	0	0	0	0	0	1	0	0	0	0	0	0	2	1	2	0	0	0	0	0	1	0	0	0	0	2.7	89	25.4	288
1142	1167525	0	2	75	1	1	0	0	0	0	0	1	0	0	0	0	0	0	0	0	0	0	0	0	0	0	0	0	0	0	0	0	1	1	1	0	0	0	0	0	0	0	0	0	0	3.94	117	37.9	208
1143	1167408	0	2	38	0	0	0	0	0	0	0	0	1	1	0	0	1	0	0	0	0	0	0	1	0	0	0	0	0	1	0	0	2	3	2	1	0	0	1	0	1	1	0	0	0	3.79	115	35	59
1144	1167379	1	1	81	1	1	1	1	0	1	0	1	1	0	0	0	0	0	0	0	0	0	0	0	0	0	1	0	0	0	1	0	1	3	2	1	1	0	1	1	1	0	1	1	0	4.4	135	41.3	163
1145	1167290	1	1	56	0	0	0	0	0	0	0	0	0	0	0	0	0	0	0	0	1	0	0	1	0	1	0	0	0	0	0	1	1	2	2	1	0	0	0	0	1	0	0	0	0	2.83	63	20.3	93
1146	1167240	0	2	82	1	0	1	0	0	1	0	0	0	0	0	0	0	0	0	0	0	0	0	0	0	0	1	0	0	0	1	0	1	1	1	0	1	0	0	0	0	0	0	0	0	4.22	114	35	572
1147	1167236	0	1	60	0	1	1	0	0	0	0	0	0	0	0	0	0	0	0	0	1	0	0	1	0	1	0	0	0	1	0	0	1	1	2	1	0	0	0	0	0	0	0	0	0	3.41	98	34.3	306
1148	1167201	1	2	50	0	0	1	0	0	0	0	1	0	0	0	0	0	0	0	0	0	0	0	0	0	0	0	0	1	1	0	0	1	1	1	0	0	0	0	1	1	0	0	1	0	5.36	155	47.8	283
1149	1167186	0	1	72	1	0	0	0	0	0	0	0	0	0	0	0	0	0	0	0	1	0	0	1	0	1	0	0	0	1	1	1	1	2	2	0	0	0	0	0	0	0	0	0	0	2.86	85	27.1	101
1150	1167141	0	2	59	0	0	0	0	0	0	0	0	0	0	0	0	0	0	0	0	0	0	0	0	0	1	0	0	0	0	0	0	3	3	1	0	0	0	0	0	0	0	0	0	0	2.25	69	20.9	174
1151	1167089	0	1	58	0	0	0	0	0	0	0	0	0	0	0	0	0	0	0	0	0	0	0	0	0	0	0	0	0	1	0	0	2	3	1	0	0	0	0	0	0	0	0	0	0	3.85	122	37	111
1152	1167072	1	1	45	0	0	0	0	0	0	1	0	0	0	0	0	0	0	0	0	0	0	0	0	0	0	0	0	0	0	0	0	1	3	1	0	0	0	0	0	0	0	0	0	0	3.88	113	34.1	106
1153	1167014	1	2	71	1	1	1	0	0	0	0	1	0	0	0	0	0	0	0	0	0	0	0	0	0	0	0	0	0	0	0	1	3	1	1	0	0	0	0	0	0	0	0	0	0	3.37	94	29.3	410
1154	1167010	0	2	39	0	0	0	0	0	0	0	0	0	0	0	0	0	0	0	0	0	0	0	0	0	0	0	0	0	1	1	1	2	3	1	0	0	0	0	0	0	0	0	0	0	3.11	97	30.1	153
1155	1166893	1	1	58	0	0	0	0	0	0	0	0	0	0	0	0	0	0	0	0	0	0	0	0	0	0	0	0	0	0	1	0	1	2	1	0	0	1	0	1	1	0	1	1	0	4.12	118	33.4	70
1156	1166762	1	2	48	0	0	0	0	0	1	0	0	0	0	0	0	0	0	0	0	1	0	0	1	1	1	0	0	0	0	0	0	1	1	2	0	1	0	0	0	0	0	0	0	0	3.22	96	28.4	108
1157	1166739	0	1	46	0	0	0	0	0	0	0	0	1	0	0	0	0	0	0	0	0	0	0	0	0	0	0	0	0	0	0	0	1	1	1	1	0	0	0	0	0	0	0	0	0	5.06	139	42.3	204
1158	1166680	0	1	42	0	0	1	0	0	0	0	0	0	0	0	0	0	0	0	0	0	0	0	0	0	0	0	0	1	1	0	0	3	3	1	0	0	0	0	0	0	0	0	0	0	3.42	91	30	177
1159	1166666	0	1	66	1	0	0	0	0	0	0	0	0	0	0	0	0	0	0	0	0	0	0	0	0	0	0	0	0	1	0	0	2	2	1	0	0	0	0	0	0	0	0	0	0	3.28	104	31	136
1160	1166618	1	2	47	0	0	0	0	0	0	0	0	0	0	0	0	0	0	0	0	0	0	0	0	0	0	0	0	0	0	1	0	1	1	1	1	0	0	0	0	0	0	0	0	0	2.48	73	21.8	110
1161	1166543	1	1	43	0	0	0	0	0	0	0	0	0	0	0	0	0	0	0	0	1	0	0	1	0	1	0	0	0	0	0	0	1	1	2	0	0	0	0	0	1	0	0	0	0	2.33	72	22.3	80
1162	1166539	1	1	47	0	0	0	0	0	0	0	0	1	1	0	0	0	0	0	0	0	0	0	0	0	1	1	0	0	0	1	1	1	1	2	0	0	0	0	0	1	0	0	0	0	3.34	96	29.3	165
1163	1166495	0	2	26	0	0	1	0	0	0	0	0	1	0	0	0	0	0	0	0	0	0	0	0	0	0	0	0	0	0	1	0	1	2	1	0	0	0	0	0	1	0	0	0	0	4	112	33	134
1164	1166480	1	2	30	0	0	0	0	0	0	0	0	0	0	0	0	0	0	0	0	1	0	0	1	0	1	0	0	0	0	0	0	1	1	2	0	0	0	0	1	0	0	0	1	0	4.28	119	36.6	166
1165	1166396	0	1	31	0	0	0	0	0	0	0	0	0	0	0	0	0	0	0	0	1	0	0	1	0	1	0	0	0	0	0	0	1	1	2	0	0	0	0	0	0	0	0	0	0	4.33	133	40.5	168
1166	1166352	0	1	69	1	0	0	0	0	0	0	0	1	0	0	0	0	0	0	0	0	0	0	0	0	1	0	0	0	0	0	0	1	1	2	0	0	0	0	0	1	0	0	0	0	2.66	78	25.2	94
1167	1166162	0	1	61	0	0	0	0	0	0	0	0	1	0	0	0	0	0	0	0	0	0	0	0	0	0	0	0	999	1	0	0	2	3	1	1	0	0	0	0	1	0	0	0	0	3.3	87	27.3	100
1168	1166154	0	1	45	0	0	1	1	0	0	0	0	0	0	0	0	0	0	0	0	0	0	0	0	0	0	0	0	0	1	0	0	1	3	1	0	0	0	0	0	0	0	0	0	0	5.59	162	52	172
1169	1166090	0	1	55	0	0	0	0	0	0	0	0	0	0	0	0	0	0	0	0	0	0	0	0	0	1	0	0	0	1	0	1	1	3	2	0	0	0	0	0	0	0	0	0	0	3.15	92	29.8	62
1170	1166077	0	2	56	0	0	0	0	0	0	0	0	0	0	0	0	0	0	0	0	1	0	0	1	0	1	0	0	0	1	0	0	1	1	2	0	0	0	0	0	0	0	0	0	0	4.42	134	40.7	265
1171	1166065	1	2	52	0	0	0	0	0	1	0	0	0	0	0	0	0	0	0	0	0	0	0	0	1	1	0	0	0	0	1	0	1	1	2	0	1	0	0	0	1	0	0	0	0	4.28	127	38.9	148
1172	1166025	0	2	44	0	0	0	0	0	0	0	0	0	0	0	0	0	0	0	0	0	0	0	0	0	1	0	0	0	1	1	1	1	3	2	1	0	0	1	0	1	0	0	0	0	16.1	70	22.2	125
1173	1166020	0	1	64	0	0	1	1	0	0	0	0	0	0	0	0	0	0	0	0	0	0	1	0	0	0	0	1	1	1	0	1	2	3	1	1	0	0	0	0	0	0	0	0	0	1.9	62	20.3	69
1174	1165987	0	2	69	1	0	0	0	0	0	0	0	1	0	0	0	0	0	0	0	1	0	0	1	0	0	0	0	0	1	0	0	1	3	1	1	0	1	0	0	1	0	0	1	0	3.69	111	32.4	61
1175	1165908	1	1	46	0	0	0	0	0	0	1	0	0	0	0	0	0	0	0	0	0	0	0	0	0	0	0	0	0	0	0	0	1	1	1	0	0	0	0	0	0	0	0	0	0	4.45	138	42.4	148
1176	1165896	1	1	62	0	1	1	0	0	1	0	1	0	0	0	0	0	0	0	0	0	0	0	0	1	1	0	0	0	0	0	0	1	2	1	0	1	0	0	0	0	0	0	0	0	4.15	135	43.2	180
1177	1165879	1	2	61	0	0	1	0	0	1	0	0	0	0	0	0	0	0	0	0	0	0	0	0	0	1	0	0	0	1	0	1	1	2	2	0	1	0	0	0	1	0	0	0	0	2.55	83	26.2	61
1178	1165713	0	1	48	0	0	0	0	0	0	1	0	0	0	0	0	0	0	0	0	0	0	0	0	0	1	0	0	0	0	0	0	1	1	2	0	0	0	0	0	0	0	0	0	0	4.42	126	37.7	138
1179	1165425	0	1	70	1	1	0	0	0	1	0	0	0	0	0	0	0	0	0	0	0	0	0	0	0	0	0	0	1	1	0	0	1	3	2	0	1	0	0	0	0	0	0	0	0	3.79	113	36.4	178
1180	1165422	0	1	47	0	0	0	0	0	0	0	0	0	0	0	0	0	0	0	0	0	0	0	0	0	1	0	0	0	0	0	1	1	1	2	0	0	0	0	0	0	0	0	0	0	2.71	76	23.1	164
1181	1165388	0	2	24	0	1	0	0	0	1	0	0	0	0	0	0	0	0	0	0	0	0	0	0	0	0	0	1	0	1	1	1	2	3	1	1	1	0	0	0	0	0	0	0	0	1.84	60	17.5	178
1182	1165342	0	2	52	0	0	0	0	0	0	0	0	0	0	0	0	0	0	0	0	1	0	0	1	0	0	0	0	0	0	0	0	1	2	1	0	0	0	0	0	0	0	0	0	0	4.1	118	36.5	128
1183	1165321	0	1	72	1	0	0	0	0	0	0	1	0	0	0	0	0	0	0	0	0	0	0	0	0	1	0	0	0	0	0	1	1	1	2	0	0	0	0	1	0	0	0	1	0	3.55	99	29.4	64
1184	1165271	0	1	78	1	0	0	0	1	1	1	0	0	0	0	0	0	0	0	1	0	0	0	0	0	0	0	1	0	1	1	0	1	3	2	1	1	0	0	0	0	0	0	0	0	3.72	114	35.4	106
1185	1165123	1	2	76	1	0	0	0	0	0	0	0	1	0	0	0	0	0	0	0	0	0	0	0	0	0	0	0	0	0	1	1	1	2	1	1	0	0	0	0	1	1	0	0	0	2.26	72	21	39
1186	1165062	0	1	59	0	0	0	0	0	0	0	1	0	0	0	0	0	0	0	0	0	0	0	0	0	0	0	0	0	0	0	0	1	1	2	0	0	0	0	0	0	0	0	0	0	4.64	142	41.8	275
1187	1165016	1	1	48	0	0	0	0	0	1	0	0	0	0	0	0	0	0	0	0	0	0	0	0	1	1	0	0	0	0	0	0	1	1	2	0	1	0	0	0	0	0	0	0	0	4.45	129	39.7	189
1188	1164839	0	1	53	0	0	1	0	0	0	0	0	1	0	0	0	0	0	0	0	0	0	0	0	0	0	0	0	0	0	0	0	3	2	1	0	0	0	0	0	0	0	0	0	0	4.27	127	37.9	264
1189	1164804	0	2	25	0	0	0	0	0	0	0	0	0	0	0	0	0	0	0	0	0	0	0	0	0	1	0	0	0	0	0	0	1	1	2	1	0	0	0	0	0	0	0	0	0	4.05	129	39.1	264
1190	1164541	0	2	61	0	1	0	0	0	1	0	0	1	0	0	0	0	0	0	0	1	0	0	1	0	1	0	0	0	1	0	0	2	3	2	1	1	1	0	1	1	0	0	1	0	2.53	72	20.8	230
1191	1164517	1	1	36	0	1	0	0	0	0	0	0	1	0	0	0	0	0	0	0	1	0	0	1	0	1	0	0	0	0	0	0	1	2	2	0	0	0	0	0	0	0	0	0	0	3.79	95	30	237
1192	1164494	0	2	79	1	1	0	0	0	1	0	0	1	1	0	0	0	0	0	0	1	0	0	1	0	0	0	0	0	1	0	0	1	3	1	0	0	0	0	0	1	0	0	0	0	3.64	112	34.7	134
1193	1164407	0	1	57	0	0	0	0	0	0	1	0	0	0	1	0	0	0	0	0	0	0	0	0	0	0	0	0	1	0	0	0	1	1	1	0	0	0	0	0	0	0	0	0	0	2.44	71	22.7	265
1194	1164356	0	1	61	0	0	0	0	0	0	0	0	1	0	0	0	0	0	0	0	0	0	0	0	0	0	1	0	999	1	0	0	2	3	1	0	0	0	0	0	0	1	0	0	0	5.85	172	53	17
1195	1164332	0	1	46	0	0	0	0	0	0	0	0	1	1	0	0	0	0	0	0	0	0	0	0	0	0	0	0	0	0	0	1	1	1	2	0	0	0	0	0	1	1	1	1	0	1.85	74	21.3	44
1196	1164310	1	2	56	0	1	0	0	0	1	0	0	0	0	0	0	0	0	0	0	0	0	0	0	1	1	0	0	0	1	0	0	1	1	2	0	1	0	0	0	0	0	0	0	0	3.92	113	35.6	97
1197	1164055	1	1	66	1	1	0	0	0	0	0	0	0	0	0	0	0	0	0	0	1	0	0	1	0	1	0	0	0	0	1	0	1	1	2	0	0	0	0	1	0	0	0	0	0	4.01	122	37.9	167
1198	1164041	1	1	74	1	0	0	0	0	0	1	0	0	0	0	0	0	0	0	0	0	0	0	0	0	1	0	0	0	0	0	1	1	3	2	0	0	0	1	1	1	0	0	0	0	1.99	61	19.2	128
1199	1164034	0	1	38	0	0	0	0	0	0	0	0	0	0	0	0	0	0	0	0	1	0	0	1	0	1	0	0	0	1	0	0	1	1	2	1	0	0	0	0	0	0	0	0	0	3.72	116	33.7	142
1200	1164017	1	1	50	0	0	0	0	0	1	0	1	0	0	0	0	0	0	0	0	1	0	0	1	1	1	0	0	0	1	0	0	1	1	2	0	1	0	1	1	0	0	0	0	0	4.7	140	43	154
1201	1163993	0	2	67	1	1	1	0	0	1	0	1	0	0	0	0	0	0	0	0	0	0	0	0	0	0	0	0	0	0	1	1	1	3	1	1	1	0	0	0	0	0	0	0	0	2.7	73	22	220
1202	1163875	0	1	49	0	0	0	0	0	0	0	0	0	0	0	0	0	0	0	0	0	0	1	0	0	1	0	0	0	0	0	0	2	2	1	0	0	0	0	0	0	0	0	0	0	4.36	132	38.6	180
1203	1163857	0	2	46	0	1	1	1	0	0	1	0	0	0	0	0	0	0	0	0	1	0	0	1	0	0	0	0	0	1	0	0	2	3	1	0	0	0	0	0	0	0	0	0	0	4.06	131	38.7	365
1204	1163845	1	1	46	0	1	0	0	0	0	0	0	0	0	0	0	0	0	0	0	0	0	0	0	0	0	0	0	0	0	0	1	1	1	2	0	0	1	0	1	1	0	0	1	0	3.34	89	27.5	229
1205	1163646	0	1	61	0	0	0	0	0	0	0	0	0	0	0	0	0	0	0	0	1	0	0	1	0	1	0	0	0	0	0	1	2	2	2	0	0	0	0	1	0	0	0	0	0	3.9	120	36	439
1206	1163598	1	2	53	0	0	0	0	0	0	0	1	0	0	0	0	0	0	0	0	0	0	0	0	0	0	0	0	0	0	0	0	1	2	1	1	0	0	0	0	0	0	0	0	0	3.94	114	36.1	253
1207	1163591	0	1	60	0	0	0	0	0	0	0	0	0	0	0	0	0	0	0	0	1	0	0	1	0	1	0	0	0	0	0	0	1	1	2	0	0	0	0	0	0	0	0	0	0	3.78	122	37	146
1208	1163547	0	1	35	0	0	0	0	0	0	0	0	0	0	0	0	0	0	0	0	0	0	0	0	0	0	0	0	1	1	0	0	2	3	1	1	0	0	0	0	1	1	0	0	0	7.02	184	57.2	13
1209	1163507	1	1	25	0	0	0	0	0	1	0	0	0	0	0	0	0	0	0	0	0	0	0	0	1	1	0	0	0	1	0	1	1	1	2	0	1	0	0	0	0	0	0	0	0	2.77	87	26.2	66
1210	1163367	1	1	44	0	0	0	0	0	1	0	0	0	0	0	0	0	0	0	0	0	0	0	0	1	1	0	0	0	0	0	0	1	1	2	1	1	0	0	0	1	0	0	0	0	3.37	102	33	100
1211	1163240	1	1	27	0	0	0	0	0	0	0	1	0	0	0	0	0	0	0	0	0	0	0	0	0	0	0	0	0	0	0	0	1	1	1	0	0	0	0	1	1	0	0	1	0	3.57	112	34.1	199
1212	1163202	0	2	53	0	0	0	0	0	0	1	0	1	0	0	0	0	0	0	0	0	0	0	0	0	0	1	0	0	0	0	0	1	1	1	0	0	0	0	0	1	0	0	0	0	2.73	88	25.9	121
1213	1163182	0	2	46	0	0	0	0	0	0	0	0	0	0	0	0	0	0	0	0	0	0	0	0	0	1	0	0	0	1	0	0	1	1	2	1	0	0	0	0	0	0	0	0	0	3.71	112	34.7	249
1214	1163165	0	2	50	0	1	1	0	0	0	0	0	1	0	0	0	0	0	0	0	1	0	0	1	0	0	0	0	0	1	0	0	2	2	1	0	0	0	0	0	1	1	0	0	0	4.15	130	40.3	50
1215	1163083	0	2	39	0	1	0	0	0	0	0	0	0	0	1	0	0	0	0	0	0	0	0	0	0	0	0	0	1	1	1	1	2	3	1	1	0	0	0	0	0	0	0	0	0	2.18	65	19.1	126
1216	1163006	0	2	57	0	1	0	0	0	0	0	0	1	0	0	0	0	0	0	0	1	0	0	1	0	1	0	0	0	0	1	1	1	1	2	0	0	0	0	0	0	0	0	0	0	3.24	88	28.5	125
1217	1163000	0	2	59	0	1	0	0	0	1	0	0	0	0	0	0	0	0	0	0	0	0	0	0	0	0	0	0	0	1	1	1	1	3	1	1	1	0	0	0	0	0	0	0	0	1.97	54	16.7	117
1218	1162999	0	2	25	0	0	0	0	0	0	0	0	0	0	0	0	0	0	0	0	0	0	0	0	0	1	0	0	0	0	0	0	1	1	2	1	0	0	0	0	0	0	0	0	0	4.25	123	37.1	147
1219	1162997	1	1	60	0	1	0	0	0	0	0	1	0	0	0	0	0	0	0	0	1	0	0	1	0	1	0	0	0	0	0	1	1	2	2	0	0	1	0	1	0	0	0	0	0	3.04	68	23.4	330
1220	1162908	0	1	79	1	0	1	0	0	0	0	0	0	0	0	0	0	0	0	0	0	0	0	0	0	1	0	0	0	0	0	1	1	1	2	0	0	0	0	0	0	0	0	0	0	3.94	85	29.6	118
1221	1162891	0	1	36	0	0	0	0	0	0	0	0	0	0	0	0	0	0	0	0	0	0	0	0	0	0	0	0	0	0	0	0	1	1	1	1	0	0	0	0	0	0	0	0	0	4.13	134	33.9	129
1222	1162804	0	1	46	0	0	0	0	0	0	0	0	0	0	0	0	0	0	0	0	1	0	0	1	0	0	0	0	0	0	1	0	1	1	1	1	0	0	0	0	0	0	0	0	0	5.6	166	51.2	384
1223	1162686	0	1	72	1	0	0	0	1	0	0	0	1	0	0	0	0	0	0	0	0	0	0	0	0	0	1	0	0	0	1	0	1	3	1	1	1	1	1	1	1	0	0	0	0	4.47	145	44.1	167
1224	1162682	0	1	45	0	0	0	0	0	0	0	1	1	0	0	0	0	0	0	0	0	0	0	0	0	0	0	0	0	0	1	1	1	1	1	0	0	0	1	1	1	0	0	1	0	2.11	63	20	234
1225	1162657	0	1	27	0	0	0	0	0	0	0	0	0	0	0	0	0	0	0	0	0	0	1	0	0	0	0	1	0	1	1	0	2	3	1	0	0	0	0	0	0	0	1	0	0	4.1	120	36	222
1226	1162523	1	1	66	1	0	0	0	0	1	0	0	0	0	0	0	0	0	0	0	0	0	0	0	1	1	0	0	0	0	0	1	1	2	2	0	1	0	0	0	0	0	0	0	0	2.76	79	24.5	187
1227	1162320	1	1	46	0	0	0	0	0	0	0	0	1	0	0	0	0	0	0	0	0	0	0	0	0	0	0	0	0	1	0	0	1	2	1	0	0	0	0	0	1	0	0	0	0	3.84	114	34.8	107
1228	1162244	1	1	83	1	0	0	0	1	1	0	0	0	0	0	0	0	0	0	0	0	0	0	0	0	0	0	0	0	1	1	0	1	3	1	0	1	1	0	0	1	0	0	1	0	4.3	134	40.7	137
1229	1162233	0	1	76	1	1	1	0	0	1	0	0	1	0	0	0	0	0	0	1	0	0	0	0	0	0	1	0	0	0	1	1	1	2	1	0	1	0	0	0	1	0	0	0	0	2.96	90	26.7	81
1230	1162188	0	1	57	0	1	0	0	0	1	0	0	0	0	0	0	0	0	0	0	0	0	0	0	0	0	0	0	0	1	0	0	1	1	1	0	1	0	0	0	0	0	0	0	0	3.77	110	33.1	241
1231	1162175	0	1	69	1	1	1	1	1	1	1	0	0	0	0	0	0	0	0	0	0	0	0	0	0	0	0	0	0	1	0	1	2	1	2	0	1	0	0	0	1	0	0	0	0	2.26	61	19.4	352
1232	1161915	0	2	57	0	0	1	1	0	0	0	0	1	0	0	0	0	0	0	0	0	0	0	0	0	0	0	0	0	1	0	1	2	3	1	0	0	0	0	0	0	0	0	0	0	4.48	97	30.9	157
1233	1161763	0	1	57	0	0	0	0	0	0	0	0	0	0	0	0	0	0	0	0	0	0	0	0	0	1	0	0	0	0	0	0	1	1	2	0	0	0	0	0	0	0	0	0	0	4.1	118	38.4	849
1234	1161739	1	1	75	1	1	1	0	1	0	0	1	1	0	0	0	0	0	0	0	0	0	0	0	0	0	1	0	0	1	0	0	1	3	1	1	1	1	1	1	1	0	0	1	0	3.88	109	34.4	379
1235	1161630	1	1	76	1	1	0	0	0	0	0	0	0	0	0	0	0	0	0	0	0	0	0	0	0	0	0	0	0	0	0	1	1	1	1	1	0	0	0	0	0	0	0	0	0	4.26	94	35	303
1236	1161626	0	2	51	0	0	0	0	0	0	0	0	0	0	0	0	0	0	0	0	0	0	0	0	0	0	0	0	0	0	0	1	3	1	1	0	0	0	0	0	0	0	0	0	0	3.01	88	27.7	142
1237	1161617	0	2	54	0	1	0	0	1	0	0	0	0	0	0	0	0	0	0	0	0	0	0	0	0	0	0	0	0	1	0	1	1	3	1	0	0	0	0	0	1	0	0	0	0	2.97	84	26.3	267
1238	1161589	0	2	51	0	0	0	0	0	0	0	0	1	1	1	0	0	0	0	0	0	0	0	0	0	0	0	0	0	1	0	1	1	2	2	1	0	0	0	0	0	0	0	0	0	2.35	72	24	93
1239	1161485	0	1	60	0	0	0	0	0	1	0	0	0	0	0	0	0	0	0	0	0	0	0	0	1	1	0	0	0	0	0	1	1	1	2	0	1	0	0	0	0	0	0	0	0	2.15	76	23.8	106
1240	1161466	0	1	30	0	0	0	0	0	0	0	0	0	0	0	0	0	0	0	0	0	0	0	0	0	1	0	0	0	0	0	0	1	2	2	0	0	0	0	0	0	0	0	0	0	3.93	124	31.8	202
1241	1161198	0	1	55	0	0	0	0	0	1	0	0	0	0	0	0	0	0	0	0	0	0	0	0	1	1	0	0	0	1	0	0	1	2	2	0	1	0	0	0	0	0	0	0	0	3.43	101	31.6	204
1242	1161186	0	1	39	0	0	0	0	0	1	0	0	0	0	0	0	0	0	0	0	0	0	0	0	0	0	0	0	0	0	0	0	1	1	2	0	1	0	0	0	0	0	0	0	0	4.72	142	43	148
1243	1161163	0	2	50	0	0	0	0	0	0	0	0	0	0	0	0	0	0	0	0	0	0	0	0	0	0	0	0	0	0	0	0	3	2	1	0	0	0	0	0	0	0	0	0	0	4.49	133	40	207
1244	1161132	0	2	58	0	1	0	0	0	0	0	0	0	0	0	0	0	0	0	0	0	0	0	0	0	0	0	0	0	1	0	0	3	2	1	0	0	0	0	0	0	0	0	0	0	3.72	153	37.6	201
1245	1161080	0	1	51	0	0	0	0	0	0	0	0	0	0	0	0	0	0	0	0	0	0	0	0	0	0	0	0	0	0	0	0	3	1	1	0	0	0	0	0	0	0	0	0	0	3.73	115	35	208
1246	1160964	0	2	27	0	0	0	0	0	0	0	0	0	0	0	0	0	0	0	0	0	0	0	0	0	1	0	0	0	1	0	0	1	3	2	1	0	0	0	0	0	0	0	0	0	5.17	145	47.2	231
1247	1160925	0	2	56	0	0	0	0	0	0	0	0	0	0	0	0	0	0	0	0	1	1	0	1	0	0	0	0	0	1	0	0	2	1	2	0	0	0	0	0	0	0	0	0	0	3.78	111	33	136
1248	1160781	0	2	81	1	1	0	0	0	0	0	0	0	0	0	0	0	0	0	0	0	0	0	0	0	1	0	0	0	0	0	0	1	1	2	0	0	0	0	0	0	0	0	0	0	3.56	98	31.8	150
1249	1160774	0	2	47	0	0	0	0	0	0	0	0	1	1	0	0	0	0	0	0	0	0	0	0	0	0	0	0	0	0	0	0	1	1	1	0	0	0	0	0	1	1	0	1	0	3.41	116	33.4	31
1250	1160773	0	1	50	0	1	0	0	0	0	0	0	1	0	0	0	0	0	0	0	0	0	0	0	0	1	0	0	0	1	0	0	3	2	2	0	0	0	0	0	0	0	0	0	0	3.59	106	32.3	75
1251	1160751	0	1	46	0	0	0	0	0	0	0	0	0	0	0	0	0	0	0	0	1	0	0	1	0	1	0	0	0	0	0	0	1	1	2	0	0	0	0	0	0	0	0	0	0	5.2	162	49.4	460
1252	1160738	1	1	56	0	0	0	0	0	0	0	0	0	0	0	0	0	0	0	0	0	0	0	0	0	0	1	0	0	0	1	0	1	3	1	1	0	1	0	1	1	0	0	1	0	4.34	140	43.2	418
1253	1160729	0	2	46	0	0	0	0	0	0	0	1	0	0	0	0	0	0	0	0	0	0	0	0	0	1	0	0	0	0	0	0	1	3	2	1	0	0	0	0	0	0	0	0	0	2.9	88	28.1	192
1254	1160687	0	1	38	0	0	0	0	0	0	0	0	0	0	0	0	0	0	0	0	0	0	0	0	0	0	0	0	0	1	0	0	1	2	1	0	0	1	0	0	0	0	1	0	0	5.07	156	48.2	306
1255	1160677	0	1	82	1	1	0	0	0	1	0	0	0	0	0	0	0	0	0	0	0	0	0	0	0	0	0	0	0	1	0	1	1	3	1	0	1	0	0	0	0	0	0	0	0	2.34	69	20.2	235
1256	1160652	0	2	69	1	1	0	0	0	1	0	0	0	0	0	0	0	0	0	0	0	0	0	0	0	0	0	0	0	1	0	0	2	3	1	0	1	0	0	0	0	0	0	0	0	3.4	114	33.6	341
1257	1160450	0	1	67	1	1	0	0	0	0	0	0	0	0	0	0	0	0	0	1	1	0	0	1	0	1	0	0	0	0	0	0	1	1	2	0	0	0	0	0	0	0	0	0	0	4.05	126	38.1	120
1258	1160332	0	1	27	0	0	0	0	0	0	0	0	1	0	0	0	0	0	0	0	0	0	0	0	0	0	0	0	0	1	0	0	2	3	1	0	0	0	0	0	0	1	1	0	0	6.62	192	56	12
1259	1160331	1	2	61	0	0	0	0	0	0	0	0	1	0	0	0	0	0	0	0	1	0	0	1	0	1	0	0	0	0	0	1	1	1	2	0	0	0	0	0	1	0	0	0	0	2.63	81	23.7	211
1260	1160325	1	2	64	0	0	0	0	0	0	0	0	1	0	0	0	0	0	0	0	0	0	0	0	0	1	1	0	0	0	0	0	1	2	2	0	0	0	0	0	0	0	0	0	0	3.31	99	29.8	85
1261	1160192	0	1	33	0	0	0	0	0	0	0	0	1	0	0	0	0	0	0	0	0	0	0	0	0	0	0	0	1	1	0	0	2	3	2	0	0	0	0	1	1	1	0	0	0	3.21	106	30.9	4
1262	1160151	0	1	30	0	0	0	0	0	0	0	0	0	0	0	0	1	0	0	0	0	0	0	1	0	0	0	0	0	1	0	1	2	3	1	0	0	0	0	0	1	0	0	0	0	2.71	72	22.1	276
1263	1160140	0	2	72	1	1	0	0	0	0	0	0	0	0	0	0	0	0	0	0	0	0	0	0	0	0	0	1	1	1	0	0	2	1	1	0	0	0	0	0	0	0	0	0	0	3.81	112	33.6	309
1264	1160131	0	1	75	1	0	0	0	0	0	0	0	1	0	0	0	0	0	0	0	1	1	0	1	0	1	0	0	0	0	0	0	1	1	2	0	0	0	0	0	0	0	0	0	0	3.65	121	34.9	250
1265	1160111	0	1	78	1	1	0	0	0	1	0	0	1	0	0	0	0	0	0	0	0	0	0	0	0	0	1	0	0	1	0	0	1	3	1	1	0	0	1	0	1	1	0	0	0	4.04	150	42.5	50
1266	1160086	1	1	52	0	1	0	0	0	0	0	0	0	0	0	0	0	0	0	0	1	0	0	1	0	1	1	0	0	0	0	0	1	3	2	1	0	1	1	1	1	0	1	0	0	3.16	96	29.5	207
1267	1160068	0	2	43	0	0	1	0	0	0	0	0	0	0	0	0	0	0	0	0	0	0	0	0	0	0	0	0	0	0	0	0	1	1	1	1	0	0	0	0	0	0	0	0	0	4.75	136	42.3	285
1268	1160022	0	1	66	1	0	0	0	0	0	0	0	1	0	0	0	0	0	0	0	1	0	0	1	0	1	0	0	0	0	0	0	1	1	2	0	0	0	0	0	0	0	0	0	0	3.78	107	33.3	157
1269	1160015	0	2	45	0	0	0	0	0	0	0	0	0	0	0	0	0	0	0	0	1	0	0	1	0	1	0	0	0	0	0	0	1	1	2	0	0	0	0	0	0	0	0	0	0	3.62	111	33.2	150
1270	1159987	1	1	89	1	1	0	0	0	0	0	0	0	0	0	0	0	0	0	0	1	0	0	1	0	1	0	0	0	0	0	0	1	1	2	0	0	0	0	0	0	0	0	0	0	3.3	104	32.2	171
1271	1159874	1	1	43	0	0	1	0	0	0	0	0	0	0	0	0	0	0	0	0	0	0	0	0	0	0	0	0	0	0	1	0	1	1	1	1	0	0	0	0	1	0	0	0	0	4.39	109	33.2	150
1272	1159792	1	2	58	0	1	0	0	0	0	0	1	0	0	0	0	0	0	0	0	0	0	0	0	0	1	0	0	0	1	0	0	1	1	2	0	0	0	0	0	0	0	0	1	0	3.82	114	32.6	297
1273	1159720	1	1	59	0	1	0	0	0	0	0	0	1	1	0	0	0	0	0	0	0	0	0	0	0	1	0	0	0	0	0	0	1	1	2	1	0	0	0	0	1	0	0	0	0	4.22	123	38.1	66
1274	1159651	1	1	72	1	0	0	0	0	0	0	1	0	0	0	0	0	0	0	0	0	0	0	0	0	0	0	0	0	0	1	0	1	2	1	0	0	0	0	1	0	0	0	1	0	3.4	111	32	128
1275	1159616	0	2	63	0	0	1	0	0	0	0	0	0	0	0	0	0	0	0	0	0	0	0	0	0	0	0	1	0	0	1	1	3	1	1	1	0	0	0	0	0	0	0	0	0	3.43	88	29.1	148
1276	1159600	0	1	52	0	0	0	0	0	0	0	0	0	0	0	0	0	0	0	0	1	0	0	1	0	1	0	0	0	0	0	1	1	1	2	0	0	0	0	0	0	0	0	0	0	1.97	63	19.7	170
1277	1159579	1	2	52	0	1	0	0	0	0	0	1	0	0	0	0	0	0	0	0	0	0	0	0	0	1	0	0	0	0	0	0	1	1	2	0	0	0	0	0	0	0	0	0	0	4.05	129	38.4	150
1278	1159576	0	1	31	0	0	0	0	0	0	0	0	1	0	0	0	0	0	0	0	0	0	0	0	0	0	0	0	0	0	0	0	1	1	2	0	0	0	0	0	1	0	0	1	0	3.86	123	36.9	120
1279	1159485	0	1	64	0	1	0	0	0	0	0	0	1	0	0	0	0	0	0	0	0	0	0	0	0	0	0	0	0	0	1	0	1	2	2	0	0	0	0	0	1	0	0	0	0	3.82	127	36.2	99
1280	1159388	1	1	62	0	0	0	0	0	0	0	0	0	0	0	0	0	0	0	0	1	0	0	1	0	1	0	0	0	0	0	0	1	1	2	1	0	0	1	0	1	0	0	1	0	2.95	85	26.6	125
1281	1159349	1	1	71	1	1	0	0	0	0	0	0	0	0	0	0	0	0	0	0	0	0	0	0	0	1	0	0	0	1	0	0	3	3	1	0	0	0	1	1	0	0	0	0	0	4.69	128	39.3	128
1282	1159310	0	1	54	0	0	0	0	0	0	0	0	0	0	0	0	0	0	0	0	0	0	0	0	0	0	0	0	0	1	0	0	2	3	1	1	0	0	0	0	0	0	0	0	0	4.15	122	36.7	221
1283	1159193	1	2	39	0	0	0	0	0	1	0	0	1	0	0	0	0	0	0	0	0	0	0	0	0	1	0	0	0	1	1	0	1	2	2	0	0	0	0	0	0	0	0	0	0	3.39	107	30.3	109
1284	1159176	0	1	35	0	0	0	0	0	0	0	0	0	0	0	0	0	0	0	0	0	0	0	0	0	0	0	0	0	0	0	0	1	1	1	1	0	0	0	0	0	0	0	0	0	4.07	132	41.2	245
1285	1159032	0	1	57	0	0	0	0	0	0	0	0	0	0	0	0	0	0	0	0	0	0	0	0	0	0	0	0	0	0	0	0	2	3	1	0	0	0	0	0	0	0	0	0	0	3.94	122	36.6	221
1286	1158989	1	1	73	1	0	0	0	0	0	0	0	0	0	0	0	0	0	0	0	0	0	0	0	0	0	0	0	0	0	0	0	1	1	1	1	0	1	0	1	0	0	1	1	0	3.9	131	38.6	175
1287	1158972	0	2	80	1	1	0	0	0	0	0	1	0	0	0	0	0	0	0	0	0	0	0	0	0	0	0	0	0	0	0	0	1	2	2	0	0	0	0	0	0	0	0	0	0	4.96	100	33	240
1288	1158934	0	2	51	0	0	0	0	0	0	0	0	0	0	0	0	0	0	0	0	0	0	0	0	0	1	0	0	0	1	1	1	1	3	1	1	0	1	0	0	0	0	0	0	0	2.89	93	27.4	83
1289	1158909	1	1	66	1	0	0	0	0	1	0	0	0	0	0	0	0	0	0	0	0	0	0	0	0	1	0	0	0	0	0	1	1	1	2	0	1	0	0	0	0	0	0	0	0	2.38	72	22.6	89
1290	1158728	0	1	19	0	0	0	0	0	0	0	0	0	0	0	0	0	0	0	0	0	0	0	0	0	0	0	0	1	0	1	0	1	1	1	1	0	0	0	0	0	0	0	0	0	5.26	161	48.7	251
1291	1158563	0	1	61	0	1	0	0	0	0	0	0	0	0	0	0	0	0	0	0	0	0	0	0	0	0	0	0	0	1	1	1	3	3	1	1	0	0	0	0	0	0	0	0	0	3.3	96	30.8	231
1292	1158528	0	2	64	0	0	0	0	0	0	0	0	0	0	1	0	0	0	0	0	0	0	1	0	0	0	0	0	0	1	0	1	2	2	1	0	0	0	0	0	0	0	0	0	0	3.68	89	30.4	329
1293	1158440	1	1	76	1	0	0	0	0	0	0	0	0	0	0	0	0	0	0	0	1	0	0	1	0	1	1	0	0	0	0	1	1	2	2	0	0	1	0	0	0	0	0	1	0	2.74	72	21	176
1294	1158410	0	1	45	0	0	0	0	0	0	0	0	1	1	0	0	0	0	0	0	0	0	0	0	0	0	0	0	0	0	0	0	1	1	1	0	0	0	0	0	0	0	0	0	0	5.91	172	52.4	70
1295	1158356	0	1	38	0	0	0	0	0	0	0	0	0	0	0	0	0	0	0	0	1	0	0	1	0	1	0	0	0	0	0	0	1	1	2	0	0	0	0	0	0	0	0	0	0	4.49	139	42.8	304
1296	1158332	0	1	46	0	0	0	0	0	0	0	0	1	1	0	0	0	0	0	0	1	1	0	1	0	0	0	0	0	1	1	0	1	3	2	1	0	0	0	0	1	0	0	0	0	3.26	85	27.7	183
1297	1158322	0	1	62	0	1	0	0	0	0	0	1	1	0	0	0	0	0	0	0	0	0	0	0	0	0	0	0	0	0	0	0	1	2	2	0	0	0	0	0	0	0	0	0	0	3.13	97	30.2	154
1298	1158226	0	2	58	0	0	0	0	0	0	0	0	0	0	0	0	0	0	0	0	0	0	0	0	0	1	0	0	0	1	0	0	1	3	2	0	0	0	0	0	0	0	0	0	0	3.77	111	33.8	168
1299	1158208	0	2	27	0	0	0	0	0	0	0	0	0	0	0	0	0	0	0	0	0	0	0	0	0	0	0	0	0	0	0	0	2	1	1	0	0	0	0	0	0	0	0	0	0	3.48	111	32	186
1300	1158174	0	2	64	0	0	0	0	0	0	0	0	0	0	0	0	0	0	0	0	0	0	0	0	0	0	1	0	0	1	1	1	1	2	1	1	0	0	0	0	0	1	0	0	0	2.22	63	21.7	39
1301	1157993	0	2	42	0	0	0	0	0	0	0	0	1	1	0	0	0	0	0	0	0	0	0	0	0	0	0	0	0	0	0	0	1	1	2	0	0	0	0	0	1	1	0	0	0	4.4	132	38.4	58
1302	1157944	1	1	19	0	0	0	0	0	0	0	0	0	0	0	0	0	0	0	0	0	0	0	0	0	0	0	0	0	0	0	0	1	1	1	1	0	0	0	0	0	0	0	1	0	3.58	134	33	166
1303	1157815	0	2	77	1	0	0	0	0	0	0	0	0	0	0	0	0	0	0	0	0	0	0	0	0	1	0	0	0	0	0	0	1	1	2	0	0	0	0	0	0	0	0	0	0	2.91	86	27.3	144
1304	1157742	1	2	55	0	1	0	0	0	1	0	0	0	0	0	0	0	0	0	0	1	0	0	1	1	1	0	0	0	0	0	0	1	1	2	0	1	0	0	0	0	0	0	0	0	3.37	90	29.7	138
1305	1157698	1	1	52	0	0	0	0	0	0	0	0	1	1	0	0	0	0	0	0	1	0	0	1	0	1	0	0	0	0	0	1	1	1	2	0	0	0	0	1	1	1	0	0	0	1.97	60	17.6	49
1306	1157623	0	1	59	0	0	0	0	0	0	0	0	1	0	0	0	0	0	0	0	1	0	0	1	0	1	0	0	0	0	0	1	1	3	2	0	0	0	0	0	1	0	0	0	0	2.52	79	23.9	239
1307	1157606	0	2	49	0	1	0	0	0	0	0	0	0	0	0	0	0	0	0	0	0	0	0	0	0	1	0	0	0	0	0	0	1	1	2	0	0	0	0	0	0	0	0	0	0	4.03	119	36.5	266
1308	1157590	0	2	21	0	0	0	0	0	0	0	0	0	0	0	0	0	0	0	0	0	0	0	0	0	0	0	0	1	1	0	0	2	2	1	0	0	0	0	0	0	0	0	0	0	4.1	99	31	167
1309	1157497	0	1	66	1	1	0	0	0	0	0	0	0	0	0	0	0	0	0	0	0	0	0	0	0	0	0	0	0	1	0	1	2	2	1	0	0	0	0	0	0	0	0	0	0	1.89	63	19.1	171
1310	1157341	0	1	56	0	0	0	0	0	1	0	0	0	0	0	0	0	0	0	0	0	0	0	0	0	0	0	0	0	1	0	0	1	2	2	1	1	1	0	0	0	0	0	1	0	4.34	144	43.2	153
1311	1157264	0	1	28	0	0	0	0	0	0	0	0	1	0	0	0	0	0	0	0	0	0	0	0	0	0	0	0	0	0	0	0	1	1	1	1	0	0	0	0	0	0	0	0	0	5.36	169	53.6	236
1312	1157244	1	1	61	0	0	0	0	0	0	0	0	0	0	0	0	0	0	0	0	0	0	0	0	0	0	0	0	0	1	0	1	2	3	1	1	0	1	1	1	1	0	0	1	0	3.11	79	29.8	79
1313	1157236	1	1	47	0	1	0	0	0	0	0	1	0	0	0	0	0	0	0	0	0	0	0	0	0	0	0	0	0	0	0	0	1	1	1	0	0	0	0	0	0	0	0	1	0	4.73	157	49.7	236
1314	1157183	0	2	29	0	0	0	0	0	0	0	0	0	0	0	0	0	0	0	0	0	0	0	0	0	1	0	0	0	0	1	1	1	1	1	1	0	0	0	0	1	0	0	0	0	3.26	94	28.7	140
1315	1157161	1	2	53	0	0	0	0	0	1	0	0	0	0	0	0	0	0	0	0	0	0	0	0	1	1	0	0	0	0	0	0	1	1	2	0	1	0	0	0	1	0	0	0	0	2.73	77	25.1	165
1316	1157149	1	2	21	0	0	0	0	0	0	0	0	1	0	0	0	0	0	0	0	0	0	0	0	0	0	0	0	0	1	1	0	2	3	1	1	0	0	0	0	1	0	0	0	0	4.87	123	39.9	123
1317	1157114	0	1	61	0	0	1	0	0	0	0	0	1	0	0	0	0	0	0	0	1	0	0	1	0	1	0	0	0	1	0	1	1	1	2	0	0	0	0	0	0	0	0	0	0	3.44	107	31.9	193
1318	1156913	0	1	61	0	0	0	0	0	0	0	0	1	1	0	0	0	0	0	0	0	0	0	0	0	0	0	0	0	0	1	0	1	1	2	0	0	0	0	0	1	0	0	0	0	3.68	116	33.4	176
1319	1156912	1	1	79	1	1	0	0	0	1	0	1	0	0	0	0	0	0	0	0	0	0	1	0	0	0	0	0	0	1	0	0	2	3	2	1	1	1	0	1	0	0	1	1	0	3.74	122	36.7	92
1320	1156841	1	1	39	0	0	0	0	0	0	0	0	1	0	0	0	0	0	0	0	0	0	0	0	1	1	0	0	0	0	0	1	1	1	2	0	0	0	0	0	1	0	0	0	0	2.85	86	27.3	81
1321	1156792	0	2	43	0	0	0	0	0	0	0	0	0	0	0	0	0	0	0	0	0	0	0	0	0	0	0	0	0	0	0	0	3	2	1	1	0	1	0	0	0	0	0	0	0	3.47	101	32.2	78
1322	1156666	0	1	46	0	0	0	0	0	0	0	0	0	0	0	0	0	0	0	0	1	0	0	1	0	1	0	0	0	0	0	0	1	1	2	1	0	0	0	0	0	0	0	0	0	4.16	116	35	170
1323	1156663	0	1	50	0	1	0	0	0	0	1	0	0	0	0	0	0	0	0	0	0	0	0	0	0	1	0	0	0	0	0	0	1	1	2	0	0	0	0	0	0	0	0	0	0	4.52	136	10.7	278
1324	1156647	0	1	65	1	0	0	0	0	0	0	0	0	0	0	0	0	0	0	0	0	0	0	0	0	0	0	0	0	0	0	0	3	3	1	0	0	0	0	0	0	0	0	0	0	3.95	95	29.4	225
1325	1156613	0	2	61	0	0	0	0	0	0	0	0	0	0	0	0	0	0	0	0	0	0	0	0	0	0	0	0	0	1	0	1	3	3	1	1	0	0	0	0	0	0	0	0	0	2.57	73	24.4	255
1326	1156587	0	1	69	1	0	0	0	0	0	0	0	0	0	0	0	0	0	0	0	1	0	0	1	0	1	0	0	0	0	0	0	1	1	2	0	0	0	0	0	0	0	0	0	0	4.13	126	38.4	179
1327	1156580	0	2	66	1	1	1	0	0	0	0	1	0	0	0	0	0	0	0	0	0	0	0	0	0	0	0	0	0	1	0	0	3	3	1	1	0	0	0	0	0	0	0	0	0	3.42	102	32.9	254
1328	1156535	0	2	36	0	0	0	0	0	0	0	0	0	0	0	0	0	0	0	0	0	0	0	0	0	0	0	0	0	1	1	1	2	3	1	1	0	0	0	0	0	0	0	0	0	2.29	59	19.4	176
1329	1156353	0	1	63	0	0	0	0	0	1	0	0	0	0	0	0	0	0	0	0	0	0	0	0	0	0	0	0	0	1	0	0	1	2	1	0	1	1	0	0	0	0	0	0	0	4.11	132	40.5	195
1330	1156277	0	2	40	0	0	0	0	0	0	0	0	0	0	0	0	0	0	0	0	0	0	0	0	0	0	0	0	0	1	0	1	1	3	2	1	0	0	1	1	1	0	0	0	0	3.19	85	27.5	140
1331	1156112	1	1	44	0	0	0	0	0	0	0	0	0	0	0	0	0	0	0	0	0	0	0	0	0	0	0	0	0	0	1	0	1	2	1	0	0	0	0	0	0	0	0	0	0	3.19	87	28.8	291
1332	1156111	0	1	44	0	0	0	0	0	0	0	0	0	0	0	0	0	0	0	0	0	0	0	0	0	1	0	0	0	1	0	0	1	2	1	1	0	0	0	0	0	0	0	0	0	4.11	114	38	286
1333	1155934	1	1	67	1	0	0	0	0	1	0	0	0	0	0	0	0	0	0	0	0	0	0	0	1	1	0	0	0	0	1	0	1	1	2	0	1	0	0	0	0	0	0	0	0	2.77	78	24.9	244
1334	1155923	1	1	27	0	0	0	0	0	0	0	0	0	0	0	0	0	0	0	0	0	0	0	0	0	0	0	0	0	0	1	0	1	1	1	0	0	0	0	1	1	0	0	0	0	3.96	125	36.7	207
1335	1155910	0	1	51	0	1	0	0	0	0	0	0	0	0	0	0	0	0	0	0	0	0	0	0	0	1	0	0	0	1	0	0	3	3	2	1	0	0	0	0	0	0	0	0	0	2.81	80	25.2	138
1336	1155890	1	1	33	0	0	0	0	0	0	0	0	1	0	0	0	0	0	0	0	0	0	0	0	0	1	0	0	0	0	1	0	1	2	1	0	0	0	0	0	0	0	0	0	0	4.25	128	39.5	169
1337	1155877	1	1	54	0	1	0	0	0	0	0	1	0	0	0	0	0	0	0	0	0	0	0	0	0	0	0	0	0	0	0	1	1	1	1	0	0	0	0	1	0	0	0	1	0	2.48	75	22.4	115
1338	1155873	0	1	59	0	0	0	0	0	0	0	0	0	0	0	0	0	0	0	0	1	0	0	1	0	1	0	0	0	0	0	0	1	1	2	0	0	0	0	0	0	0	0	0	0	4.48	134	40.2	226
1339	1155822	0	1	27	0	0	0	0	0	0	0	0	0	0	0	0	0	0	0	0	0	0	0	0	0	1	0	0	0	0	0	0	1	1	2	0	0	0	0	0	0	0	0	0	0	5.09	111	35.6	132
1340	1155779	1	1	69	1	0	0	0	0	0	0	0	0	0	0	0	0	0	0	0	0	0	0	0	0	1	0	0	0	0	0	0	1	1	2	0	0	0	0	0	0	0	0	0	0	3.38	97	30.5	137
1341	1155735	0	1	57	0	0	0	0	0	0	0	0	1	0	0	0	0	0	0	0	1	0	0	1	0	1	0	0	0	0	0	0	1	1	2	0	0	0	0	0	0	0	0	0	0	3.11	105	31.1	187
1342	1155695	1	2	48	0	0	0	0	0	1	0	0	0	0	0	0	0	0	0	0	0	0	0	0	1	1	0	0	0	1	0	1	1	1	2	0	1	0	0	0	1	0	0	0	0	4.74	102	35.6	285
1343	1155610	0	1	57	0	0	0	0	0	0	0	0	0	0	0	0	0	0	0	0	0	0	0	0	0	1	0	0	0	1	0	0	1	1	2	0	0	0	0	0	0	0	0	0	0	4.6	143	43.4	146
1344	1155440	1	1	73	1	1	0	0	1	0	0	0	0	0	0	0	0	0	0	1	0	0	0	0	0	1	0	0	0	1	0	0	1	3	2	1	1	1	1	0	0	0	0	0	0	4.4	138	43.7	122
1345	1155396	0	1	51	0	0	0	0	0	0	0	0	0	0	0	0	0	0	0	0	0	0	0	0	0	0	0	0	0	0	0	1	4	1	2	0	0	0	0	0	0	1	0	0	0	2.88	73	24.1	56
1346	1155349	1	2	62	0	1	1	1	0	1	0	0	0	0	0	0	0	0	0	0	1	0	0	1	0	0	0	0	0	0	1	1	1	2	2	0	1	0	1	1	0	0	0	1	0	2.99	85	26.1	153
1347	1155307	0	1	40	0	0	0	0	0	0	0	0	1	0	0	0	0	0	0	0	1	0	0	1	0	1	0	0	0	0	0	0	1	1	2	0	0	0	0	0	0	0	0	0	0	3.28	98	29.8	260
1348	1155302	0	1	25	0	0	0	0	0	0	0	0	1	0	0	0	0	0	0	0	0	0	0	0	0	0	1	0	0	0	1	0	1	2	1	0	0	0	0	0	1	0	0	0	0	4.99	141	42.3	71
1349	1155292	0	2	80	1	1	0	0	0	0	0	0	0	0	0	0	0	0	0	0	0	0	0	0	0	1	0	0	0	0	0	0	1	3	2	0	0	0	0	0	0	0	0	0	0	2.89	81	26.9	244
1350	1155286	1	2	53	0	1	0	0	0	0	0	1	0	0	0	0	0	0	0	0	1	0	0	1	0	1	0	0	0	0	0	1	1	1	2	0	0	0	0	0	0	0	0	0	0	3.83	105	33.4	335
1351	1155274	0	1	67	1	1	1	1	0	0	1	0	0	0	0	0	0	0	0	0	0	0	0	0	0	0	0	0	0	0	0	0	1	1	2	0	0	0	0	0	0	0	0	0	0	3.28	101	30.3	264
1352	1155127	0	2	58	0	0	0	0	0	0	0	0	0	0	0	0	0	0	0	0	0	0	0	0	1	1	0	0	0	1	1	1	1	1	2	0	0	0	0	0	1	0	0	0	0	2.85	85	25.2	120
1353	1155120	0	1	61	0	0	0	0	0	0	0	0	1	0	0	0	0	0	0	0	0	0	1	0	0	1	0	0	0	1	1	0	1	2	2	1	0	0	0	0	1	1	0	0	0	3.77	123	34.9	47
1354	1155085	1	2	50	0	0	0	0	0	1	0	0	0	0	0	0	0	0	0	0	0	0	0	0	1	1	0	0	0	0	1	0	1	1	2	0	1	0	0	0	0	0	0	0	0	3.07	110	34	88
1355	1155027	1	2	48	0	1	0	0	0	1	0	1	0	0	0	0	0	0	0	0	0	0	0	0	1	1	0	0	0	1	1	0	1	3	2	0	1	0	0	1	1	0	0	1	0	3.57	108	32.7	160
1356	1154872	0	1	34	0	0	0	0	0	0	0	0	0	0	0	0	0	0	0	0	0	0	0	0	0	0	0	0	0	0	0	0	2	3	2	0	0	0	0	0	0	0	0	0	0	17.9	134	41.2	198
1357	1154852	1	1	39	0	1	0	0	0	0	0	0	0	0	0	0	0	0	0	0	1	0	0	1	0	0	0	0	0	1	0	0	3	3	1	1	0	0	0	0	0	0	0	0	0	3.97	124	38	330
1358	1154844	0	2	57	0	0	0	0	0	0	0	0	1	0	0	0	0	0	0	0	1	0	0	1	0	0	0	0	0	0	1	1	1	1	1	0	0	0	0	0	1	0	0	0	0	2.32	68	19.9	309
1359	1154798	0	2	48	0	0	0	0	0	0	0	0	0	0	0	0	0	0	0	0	0	0	0	0	0	0	0	0	1	1	0	0	3	3	1	1	0	0	1	1	0	0	0	0	0	12.1	104	30	142
1360	1154796	0	1	47	0	1	0	0	0	1	0	0	0	0	0	0	0	0	0	0	0	0	0	0	0	0	0	0	0	1	0	0	3	1	1	0	1	0	0	0	0	0	0	0	0	5.24	142	44.7	305
1361	1154795	0	2	60	0	1	1	0	0	1	0	0	0	0	0	0	0	0	0	0	0	0	0	0	0	0	0	0	0	1	0	1	1	2	1	0	1	0	0	0	0	0	0	0	0	3.21	93	29.6	162
1362	1154680	0	2	59	0	0	0	0	0	0	0	0	0	0	0	0	0	0	0	0	0	0	0	0	0	0	0	0	0	1	0	0	2	3	1	0	0	0	0	0	0	0	0	0	0	4.17	119	38.3	253
1363	1154660	0	1	45	0	1	1	0	0	0	0	0	0	0	0	0	0	0	0	0	1	0	0	1	0	1	0	0	0	0	0	0	1	1	2	0	0	0	0	0	0	0	0	0	0	3.44	106	32.4	531
1364	1154607	1	1	46	0	0	0	0	0	0	0	1	0	0	0	0	0	0	0	0	0	0	0	0	0	1	0	0	0	0	0	0	1	2	2	1	0	0	0	1	0	0	0	0	0	4.43	140	41.5	182
1365	1154583	0	1	52	0	0	0	0	0	0	0	0	0	0	0	0	0	0	0	0	1	0	0	1	0	1	0	0	0	0	0	0	1	1	2	0	0	0	0	0	0	0	0	0	0	4.77	148	41.7	247
1366	1154553	0	2	58	0	0	0	0	0	0	0	0	1	0	0	0	0	0	0	0	0	0	0	0	0	0	0	0	0	1	0	0	2	3	1	0	0	0	0	0	0	0	0	0	0	5	98	29.8	110
1367	1154550	0	2	51	0	0	0	0	0	0	0	0	0	0	0	0	0	0	0	0	1	0	0	1	0	1	0	0	0	0	0	0	1	1	2	1	0	0	0	0	0	0	0	0	0	4	110	34.9	160
1368	1154506	1	2	30	0	1	0	0	0	0	0	0	0	0	0	0	0	0	0	0	0	0	0	0	0	1	0	0	1	1	1	0	1	1	1	1	0	0	0	0	1	1	0	0	0	5.03	156	46.2	46
1369	1154488	1	1	63	0	1	0	0	0	1	1	0	0	0	0	0	0	0	0	0	0	0	0	0	0	1	0	0	0	0	0	0	2	2	2	1	1	0	0	1	0	0	0	0	0	4.5	137	42.8	141
1370	1154486	1	2	59	0	0	0	0	0	0	0	0	0	0	0	0	0	0	0	0	0	0	0	0	0	0	0	0	0	0	0	0	3	3	1	1	0	0	0	0	0	0	0	0	0	3.93	113	34.7	185
1371	1154482	0	1	81	1	0	0	0	0	1	0	1	0	0	0	0	0	0	0	0	0	0	0	0	0	0	0	0	0	1	0	1	2	3	2	1	1	1	1	1	0	0	0	1	0	2.82	84	27.1	318
1372	1154446	1	2	29	0	0	0	0	0	0	0	0	0	0	0	0	0	0	0	0	0	0	0	0	0	0	0	0	0	0	1	0	1	2	1	0	0	0	0	0	0	0	0	0	0	3.16	104	29.8	233
1373	1154420	1	1	70	1	0	0	0	0	0	0	1	0	0	0	0	0	0	0	0	0	0	0	0	0	0	1	0	0	0	1	1	1	2	1	0	0	0	0	1	1	0	0	1	0	2.5	79	23.1	120
1374	1154371	0	2	22	0	0	0	0	0	0	0	0	1	0	0	0	0	0	0	0	0	0	0	0	0	0	0	0	0	1	1	1	2	2	1	1	0	0	0	0	1	0	0	0	0	2.99	90	30.3	123
1375	1154348	0	2	25	0	1	0	0	0	0	0	0	0	0	1	0	0	0	0	0	0	0	0	0	0	0	0	0	0	1	0	0	2	3	1	0	0	0	0	0	0	1	0	1	0	2.74	80	25.2	54
1376	1154285	0	1	43	0	0	0	0	0	0	0	0	1	1	0	0	0	0	0	0	0	0	0	0	0	0	0	0	0	1	0	1	1	1	1	0	0	0	0	0	1	1	0	0	0	2.43	83	24.2	50
1377	1154176	0	1	66	1	0	0	0	0	0	0	0	1	0	0	0	0	0	0	0	1	0	0	1	0	0	0	0	0	0	1	0	1	1	1	0	0	0	0	0	1	0	0	0	0	3.45	116	34.5	122
1378	1154129	1	1	50	0	1	0	0	0	0	1	0	0	0	0	0	0	0	0	0	0	0	0	0	0	0	0	0	0	0	0	0	2	2	2	1	0	0	0	0	0	0	0	0	0	3.15	105	31.8	74
1379	1154105	1	1	47	0	0	0	0	0	0	0	1	0	0	0	0	0	0	0	0	0	0	0	0	0	0	0	0	0	0	0	1	1	2	1	0	0	0	0	1	0	0	0	1	0	2.43	95	24.9	261
1380	1154103	0	1	56	0	0	0	0	0	0	0	0	0	0	0	1	0	0	0	0	0	0	0	1	0	0	0	0	0	1	0	1	2	3	1	0	0	0	0	0	0	0	0	0	0	2.3	67	21.1	194
1381	1154029	0	2	49	0	0	0	0	0	0	0	0	0	0	0	1	0	0	0	0	0	0	0	1	0	0	0	0	0	0	1	1	2	2	1	0	0	0	0	0	0	0	0	0	0	1.69	58	18	144
1382	1154009	0	1	38	0	0	0	0	0	0	0	0	1	0	0	0	0	0	0	0	0	0	0	0	0	1	1	0	0	1	0	0	1	3	2	0	0	0	0	0	0	0	0	0	0	3.41	108	32.9	301
1383	1153946	0	2	61	0	0	0	0	0	0	0	0	0	0	0	0	0	0	0	0	1	1	0	1	0	1	0	0	0	0	0	0	1	1	2	0	0	0	0	0	1	0	0	0	0	3.88	113	35.2	294
1384	1153866	0	1	47	0	1	0	0	0	0	0	0	1	1	0	0	0	0	0	0	0	0	0	0	0	0	0	0	0	0	1	0	1	1	1	0	0	0	0	0	1	0	0	0	0	4.48	128	38.3	175
1385	1153817	1	1	41	0	0	0	0	0	0	0	0	0	0	0	0	0	0	0	0	0	0	0	0	0	0	0	0	0	0	1	0	1	1	2	0	1	0	1	0	1	1	0	0	0	3.34	90	27.4	8
1386	1153775	0	2	58	0	0	0	0	0	0	0	0	0	0	0	0	0	0	0	0	0	0	0	0	0	0	0	0	0	0	0	0	2	3	1	0	0	0	0	0	1	0	0	0	0	3.95	114	34.6	143
1387	1153762	0	1	38	0	0	0	0	0	0	0	0	1	0	0	1	0	0	0	0	0	0	0	1	0	0	1	0	0	0	0	1	1	2	2	0	0	0	0	0	0	1	0	1	0	2.13	73	21.4	24
1388	1153663	0	1	50	0	1	1	0	0	0	1	1	0	0	0	0	0	0	0	0	0	0	0	0	0	1	0	0	0	1	0	0	1	2	1	0	0	0	0	0	0	0	0	0	0	5.05	155	50	183
1389	1153632	0	1	65	1	0	0	0	0	0	0	0	1	0	0	0	0	0	0	0	1	0	0	1	0	1	0	0	0	0	0	0	1	2	2	0	0	0	0	0	0	0	0	0	0	5.56	164	49.2	199
1390	1153604	1	1	42	0	0	0	0	0	0	1	0	1	1	0	0	0	0	0	0	1	1	0	1	0	1	0	0	0	0	0	0	1	2	2	0	0	0	0	0	1	0	1	0	0	2.36	69	21.5	193
1391	1153576	0	2	44	0	1	0	0	0	0	0	0	0	0	0	0	0	0	0	0	1	0	0	1	0	0	0	0	0	0	0	0	2	1	2	0	0	0	0	0	0	0	0	0	0	4.54	134	42.5	212
1392	1153555	1	2	39	0	0	0	0	0	0	0	0	1	1	0	0	0	0	0	0	0	0	0	0	0	0	0	0	1	1	1	1	1	3	1	1	0	0	0	0	1	1	0	0	0	2.04	67	19.3	23
1393	1153536	0	1	69	1	1	1	0	0	1	0	1	0	0	0	0	0	0	0	0	0	0	0	0	0	0	0	0	0	0	0	0	1	1	2	0	0	0	0	0	1	0	0	1	0	5.03	152	43.8	232
1394	1153520	0	2	65	1	0	0	0	0	0	0	1	0	0	0	0	0	0	0	0	0	0	0	0	0	1	0	0	0	0	0	0	1	1	2	0	0	0	0	0	0	0	0	1	0	3.13	105	32.7	406
1395	1153504	0	1	75	1	1	1	0	0	0	0	0	0	0	0	0	0	0	0	0	0	0	0	0	0	0	0	0	0	0	1	1	3	1	1	0	0	0	0	0	0	0	0	0	0	1.94	53	16.1	191
1396	1153474	1	1	73	1	1	1	0	0	1	0	1	0	0	0	0	0	0	0	0	0	0	0	0	0	0	0	1	0	1	1	0	1	2	1	1	0	0	0	0	1	1	0	0	0	3.15	105	31.1	48
1397	1153395	0	1	52	0	0	0	0	0	0	0	0	0	0	0	0	0	0	0	0	1	0	0	1	0	1	0	0	0	0	0	0	1	1	2	0	0	0	0	0	0	0	0	0	0	4.45	130	41.1	182
1398	1153379	1	2	29	0	0	0	0	0	0	0	0	0	0	0	0	0	0	0	0	0	0	0	0	0	0	0	0	0	1	0	0	1	3	1	0	1	0	0	0	1	0	0	0	0	4.3	129	41	133
1399	1153333	1	2	35	0	0	1	0	0	0	0	0	0	0	0	0	0	0	0	0	0	0	0	0	0	1	0	0	0	0	1	1	1	2	2	0	0	0	0	0	0	1	0	0	0	2.12	63	19.5	46
1400	1153248	1	1	50	0	1	0	0	0	0	0	1	0	0	0	0	0	0	0	0	0	0	0	0	0	1	0	0	0	0	0	0	1	1	2	0	0	0	0	0	0	0	0	1	0	5.17	158	47.6	178
1401	1153200	1	1	62	0	1	0	0	0	0	0	0	0	0	0	0	0	0	0	0	0	0	0	0	0	1	0	0	0	0	0	0	2	3	1	1	0	0	0	1	0	0	0	0	0	4.32	131	40.3	142
1402	1153181	1	2	60	0	1	0	0	0	0	1	0	0	0	0	0	0	0	0	0	0	0	0	0	0	0	0	0	0	1	0	1	2	2	2	1	0	0	1	1	1	1	0	0	0	3.57	104	33	52
1403	1153148	0	1	65	1	0	0	0	0	0	0	0	0	0	0	0	0	0	0	0	0	0	0	0	0	0	1	0	0	0	1	1	1	2	1	0	1	0	1	0	0	0	0	0	0	2.56	83	25.2	142
1404	1153129	1	1	66	1	0	0	0	0	0	0	0	0	0	0	0	0	0	0	0	1	0	0	1	0	1	0	0	0	0	0	0	1	1	1	0	0	0	0	0	0	0	0	0	0	2.94	96	29.9	136
1405	1153115	1	1	32	0	0	0	0	0	0	0	0	1	0	0	0	0	0	0	0	0	0	0	0	0	0	1	0	0	1	0	0	1	3	1	1	0	0	1	1	1	0	1	1	0	4.58	140	45.2	90
1406	1153084	0	1	70	1	0	0	0	0	1	0	0	0	0	0	0	0	0	0	0	0	0	0	0	0	0	0	0	0	1	0	0	2	3	1	1	1	1	1	1	1	0	1	1	0	4.24	137	41.5	140
1407	1153064	0	2	64	0	1	0	0	1	0	0	0	0	0	0	0	0	0	0	0	1	0	0	1	0	1	0	0	0	1	0	0	1	2	1	0	0	0	0	0	0	0	0	0	0	4.51	135	41.4	275
1408	1152890	0	1	52	0	1	0	0	0	0	0	0	0	0	0	0	0	0	0	0	0	0	0	0	0	0	0	0	0	0	0	0	4	2	2	0	0	0	0	0	0	0	0	0	0	5.15	163	48.8	255
1409	1152835	0	1	19	0	0	0	0	0	0	0	0	0	0	0	0	0	0	0	0	0	0	0	0	0	0	0	0	1	1	1	0	1	1	1	0	0	0	0	0	0	0	0	0	0	4.96	154	45.4	209
1410	1152745	1	1	73	1	1	1	0	0	1	0	1	0	0	0	0	0	0	0	0	0	0	0	0	0	0	1	0	0	1	1	1	1	3	1	0	0	0	1	0	1	0	0	0	0	2.67	73	33	378
1411	1152711	1	1	77	1	1	0	0	0	0	0	0	0	0	0	0	0	0	0	0	0	0	0	0	0	1	0	0	0	0	0	0	1	2	2	0	0	0	1	1	0	0	0	0	0	4.34	123	38	223
1412	1152709	1	1	76	1	1	0	0	0	0	0	1	0	0	0	0	0	0	0	0	0	0	0	0	0	1	1	0	0	0	0	1	1	1	2	0	0	1	0	0	1	0	0	1	0	2.78	87	26.5	73
1413	1152688	1	2	69	1	0	0	0	0	0	0	1	0	0	0	0	0	0	0	0	0	0	0	0	0	0	0	0	0	0	0	1	1	1	1	0	0	1	0	0	0	1	0	0	0	2.72	88	24.9	17
1414	1152658	0	2	22	0	0	0	0	0	0	0	0	1	0	0	0	0	0	0	0	0	0	0	0	0	1	0	0	0	0	0	1	1	2	1	1	0	0	0	0	1	0	0	0	0	2.51	83	28.5	99
1415	1152632	0	2	81	1	1	1	0	0	0	1	0	0	0	0	0	0	0	0	0	0	0	0	0	0	0	0	0	0	0	0	0	1	2	2	0	0	0	0	0	0	0	0	0	0	2.37	68	21.7	91
1416	1152627	1	2	41	0	0	0	0	0	0	0	0	1	0	0	0	0	0	0	0	0	0	0	0	0	0	0	0	0	1	1	1	1	3	1	0	0	0	0	1	0	0	0	0	0	2.57	76	23.7	133
1417	1152610	1	1	61	0	1	1	0	1	1	0	0	0	0	0	0	0	0	0	0	0	0	0	0	0	0	0	0	0	1	0	0	1	2	1	1	1	0	0	0	1	0	0	0	0	4.47	151	43.4	139
1418	1152602	0	2	15	0	0	0	0	0	0	0	0	0	0	1	0	0	0	0	0	0	0	0	0	0	0	0	0	1	1	1	0	2	1	1	0	0	0	0	0	0	0	0	0	0	5.29	138	43	439
1419	1152582	1	1	67	1	0	0	0	0	0	0	0	0	0	0	0	0	0	0	0	0	0	1	0	0	0	1	0	0	1	1	1	1	1	1	1	0	0	0	0	0	0	0	0	0	2.84	63	21.6	282
1420	1152572	1	1	52	0	1	0	0	0	0	0	1	1	0	0	0	0	0	0	0	0	0	0	0	0	0	0	0	0	1	0	1	1	1	1	0	0	0	0	1	0	0	0	1	0	3	92	28.1	191
1421	1152553	0	2	68	1	0	0	0	0	0	0	0	1	0	0	0	0	0	0	0	1	0	0	1	0	0	0	0	0	0	1	0	1	1	2	0	0	0	0	0	0	0	0	0	0	4.56	136	40.7	277
1422	1152547	0	1	24	0	0	0	0	0	0	0	0	0	0	0	0	1	0	0	0	0	0	0	1	0	1	0	0	0	0	0	0	1	1	2	0	0	0	0	0	0	0	0	0	0	3.39	109	32.8	141
1423	1152519	0	1	55	0	0	0	0	0	0	1	0	1	0	0	0	0	0	0	0	0	0	0	0	0	1	0	0	0	0	0	0	1	1	2	0	0	0	0	0	1	0	0	0	0	3.65	117	36.7	111
1424	1152518	0	2	76	1	1	1	1	0	1	1	0	0	0	0	0	0	0	0	0	0	0	0	0	0	0	0	0	0	1	0	0	2	1	1	0	1	0	0	0	0	0	0	0	0	4.13	124	40.9	153
1425	1152502	0	2	40	0	0	0	0	0	0	0	1	0	0	0	0	0	0	0	0	0	0	0	0	0	1	0	0	0	0	0	0	4	1	2	0	0	0	0	0	0	0	0	0	0	4.08	107	34.5	226
1426	1152424	1	2	22	0	0	0	0	0	0	0	0	0	0	0	0	0	0	0	0	0	0	0	0	0	0	0	0	0	0	0	0	2	3	1	0	0	0	1	0	0	0	0	0	0	3.98	117	35.5	88
1427	1152394	1	1	45	0	0	0	0	0	0	0	0	0	0	0	0	0	0	0	0	0	0	0	0	0	1	0	0	0	0	0	0	1	1	2	0	0	0	0	0	0	0	0	0	0	2.87	92	27.5	210
1428	1152337	1	1	26	0	0	0	0	0	0	0	1	0	0	0	0	0	0	0	0	0	0	0	0	0	0	0	0	0	0	0	0	1	1	2	0	0	0	0	0	0	0	0	0	0	3.73	111	33.9	68
1429	1152305	0	1	38	0	0	0	0	0	1	0	0	0	0	0	0	0	0	0	0	0	0	0	0	0	1	0	0	0	0	0	1	1	1	2	1	1	0	0	0	0	0	0	0	0	4.35	91	30.7	160
1430	1152281	0	1	77	1	0	0	0	0	0	0	0	0	0	0	0	0	0	0	0	0	0	0	0	0	0	0	0	0	0	0	0	1	3	1	0	0	0	0	0	0	0	0	0	0	3	87	27.1	115
1431	1152265	1	2	24	0	0	0	0	0	0	0	0	0	0	0	0	0	0	0	0	0	0	0	0	0	1	0	0	0	1	1	1	1	3	1	1	0	0	0	0	1	0	0	0	0	3.17	91	28.6	92
1432	1152247	0	1	74	1	0	0	0	0	0	0	0	1	1	0	0	0	0	0	0	1	1	0	1	0	1	0	0	0	0	1	1	1	1	2	0	0	0	0	0	1	0	1	0	0	2.33	75	25	64
1433	1152243	0	1	70	1	1	1	0	0	0	0	0	0	0	0	0	0	0	0	0	0	0	0	0	0	1	0	0	0	0	1	1	1	1	2	0	0	0	0	0	0	0	0	0	0	2.34	69	21.4	262
1434	1152177	0	1	50	0	0	0	0	0	0	0	0	1	0	0	0	0	0	0	0	0	0	0	0	0	0	0	0	0	1	0	0	2	3	2	1	0	0	0	0	0	0	0	1	0	5.05	157	45.6	193
1435	1152159	0	1	47	0	0	0	0	0	0	1	0	0	0	0	0	0	0	0	0	0	0	1	0	0	0	0	0	0	0	0	0	2	2	1	0	0	0	0	0	0	0	0	0	0	2.68	77	23.4	507
1436	1152148	1	1	66	1	0	0	0	0	0	0	0	0	0	0	0	0	0	0	0	0	0	0	0	0	1	0	0	0	0	1	0	1	2	2	0	0	0	0	1	1	0	0	1	0	2.54	77	23.6	182
1437	1152136	0	1	65	1	0	0	0	0	0	0	0	0	0	0	0	0	0	0	0	1	0	0	1	0	1	0	0	0	0	0	0	3	1	2	0	0	0	0	0	0	0	0	0	0	4.03	124	39.1	144
1438	1152092	0	2	48	0	0	0	0	0	0	0	0	0	0	0	0	0	0	0	0	0	0	1	0	0	0	0	0	0	0	0	0	1	1	2	0	0	0	0	0	0	0	0	0	0	5.08	144	45.5	236
1439	1152017	0	2	58	0	1	0	0	0	1	0	0	1	0	1	0	0	0	0	0	0	0	0	0	0	0	0	0	0	1	0	0	1	1	1	0	1	0	0	0	0	0	0	0	0	4.03	117	35.4	198
1440	1151940	1	1	63	0	0	0	0	0	0	0	1	0	0	0	0	0	0	0	0	1	0	0	1	0	0	1	0	0	0	0	0	1	2	2	1	0	1	1	1	1	0	0	1	0	4.46	123	38.4	288
1441	1151876	1	2	48	0	0	0	0	0	0	0	0	0	0	0	0	0	0	0	0	0	0	0	0	1	1	0	0	0	0	0	1	1	1	2	0	0	0	0	0	0	0	0	0	0	2.32	69	21.3	130
1442	1151814	0	1	65	1	1	1	0	0	0	0	1	0	0	0	0	0	0	0	0	0	0	0	0	0	0	0	0	0	1	0	0	1	2	1	1	0	0	0	1	1	0	0	1	0	2.98	88	29	153
1443	1151753	1	2	35	0	0	0	0	0	0	0	0	0	0	0	0	0	0	0	0	0	0	0	0	0	1	0	0	0	1	1	1	2	3	1	1	0	0	0	0	1	0	0	0	0	1.52	50	15.1	106
1444	1151724	0	1	18	0	1	0	0	0	0	0	0	0	0	0	0	0	0	0	0	0	0	0	0	0	0	0	0	0	1	0	1	2	3	1	0	0	0	0	0	0	0	0	0	0	2.13	66	19.2	210
1445	1151713	1	1	37	0	1	0	0	0	0	0	0	0	0	0	0	0	0	0	0	0	0	0	0	1	1	0	0	0	0	1	0	1	3	2	0	0	0	0	0	0	0	0	0	0	3.18	92	28.9	189
1446	1151683	1	2	51	0	0	0	0	0	0	0	1	0	0	0	0	0	0	0	0	0	0	0	0	0	0	0	0	0	0	1	1	1	1	1	0	0	0	0	0	0	0	0	0	0	3.08	86	28.4	217
1447	1151585	1	2	64	0	1	1	1	0	1	0	0	0	0	0	0	0	0	0	0	0	0	0	0	0	0	0	0	0	1	0	0	1	3	2	1	1	0	1	1	0	0	0	1	0	3.69	102	31.1	267
1448	1151556	0	2	71	1	0	0	0	1	1	0	1	0	0	0	0	0	0	0	0	0	0	0	0	0	0	0	0	0	1	0	0	1	2	1	1	1	0	1	1	1	0	0	0	0	5.96	170	55.3	171
1449	1151495	0	1	49	0	0	0	0	0	0	0	0	0	0	0	0	0	0	0	0	0	0	0	0	0	1	0	0	0	0	0	0	1	1	2	0	0	0	0	0	0	0	0	0	0	3.99	116	36.6	229
1450	1151447	0	2	44	0	0	0	0	0	0	0	0	1	0	0	0	0	0	0	0	1	0	0	1	0	1	0	0	0	1	0	0	1	2	2	1	0	0	0	0	1	0	0	0	0	4.15	129	41.2	507
1451	1151332	0	1	78	1	0	0	0	0	0	0	0	1	0	0	0	0	0	0	0	1	0	0	1	0	1	0	0	0	0	0	0	2	2	2	1	0	0	0	0	1	0	0	0	0	3.79	125	35.4	141
1452	1151313	1	1	53	0	0	0	0	0	0	0	1	0	0	0	0	0	0	0	0	1	0	0	1	0	1	0	0	0	0	0	0	1	1	2	0	0	0	0	0	0	0	0	0	0	4.17	123	37.9	191
1453	1151294	1	1	50	0	0	0	0	0	1	0	0	0	0	0	0	0	0	0	0	0	0	0	0	0	0	0	0	0	1	0	0	1	1	1	0	1	0	0	0	1	0	0	0	0	5.84	175	52.2	269
1454	1151208	1	2	31	0	0	0	0	0	1	0	0	0	0	0	0	0	0	0	0	0	0	0	0	0	1	0	0	0	0	1	1	1	1	1	0	1	0	0	0	1	0	0	0	0	3.57	85	29.6	131
1455	1151187	0	2	50	0	1	1	0	0	0	0	0	1	1	0	0	0	0	0	0	0	0	0	0	0	0	0	0	1	0	0	0	4	3	1	0	0	0	0	0	0	0	0	0	0	3.58	111	32.6	326
1456	1151137	0	2	45	0	0	0	0	0	0	0	0	0	0	1	0	0	0	0	0	1	0	0	1	0	0	1	0	0	0	0	1	2	3	1	0	0	0	0	0	0	1	0	0	0	2.5	73	22.5	7
1457	1151098	1	1	62	0	1	0	0	0	0	1	0	0	0	0	0	0	0	0	0	0	0	0	0	0	0	0	0	0	1	0	0	1	2	1	1	0	1	0	0	0	0	0	1	0	3.75	119	36.1	136
1458	1150954	1	1	33	0	1	0	0	0	0	0	1	0	0	0	0	0	0	0	0	0	0	0	0	0	1	0	1	0	1	1	1	1	3	2	1	0	0	0	0	0	0	0	1	0	2.45	75	22.8	134
1459	1150930	0	1	43	0	0	0	0	0	0	0	1	0	0	0	0	0	0	0	0	0	0	0	0	0	0	0	0	0	0	0	0	4	1	2	0	0	0	0	0	0	0	0	0	0	4.75	155	45	168
1460	1150922	0	2	63	0	0	0	0	0	0	0	0	0	0	0	0	0	0	0	0	1	0	0	1	0	1	0	0	0	0	0	0	1	1	2	0	0	0	0	0	0	0	0	0	0	3.56	109	32.8	261
1461	1150883	0	2	74	1	0	0	0	0	0	0	0	0	0	0	0	1	0	0	0	0	0	0	1	0	0	0	0	0	1	0	0	1	3	2	0	0	0	0	0	0	0	0	1	0	4.01	109	33.9	241
1462	1150864	0	1	23	0	0	0	0	0	0	0	0	0	0	1	0	0	0	0	0	0	0	0	0	0	0	0	0	1	1	1	1	2	2	1	0	0	0	0	0	0	0	0	0	0	2.57	76	24.1	253
1463	1150811	1	1	58	0	1	0	0	0	0	0	1	0	0	0	0	0	0	0	0	0	0	0	0	0	1	0	0	0	0	0	0	1	1	2	0	0	0	0	1	1	0	0	1	0	4.23	127	39.1	171
1464	1150648	0	2	46	0	1	0	0	0	0	0	0	0	0	0	0	0	0	0	0	1	0	0	1	0	1	0	0	0	0	0	1	1	2	2	0	0	0	0	0	1	0	0	0	0	3.82	92	30.8	284
1465	1150573	0	1	23	0	0	0	0	0	0	0	0	0	0	0	0	0	0	0	0	1	0	0	1	0	1	0	0	0	0	0	0	1	1	2	0	0	0	0	0	0	0	0	0	0	5.28	152	47.7	252
1466	1150545	0	1	44	0	0	0	0	0	0	0	0	0	0	0	0	0	0	0	0	1	0	0	1	0	1	0	0	0	0	0	0	1	2	2	1	0	0	0	0	0	0	0	0	0	4.65	141	44.4	365
1467	1150466	0	1	24	0	0	0	0	0	0	0	0	0	0	0	0	0	0	0	0	0	0	0	0	0	0	0	0	0	0	0	1	2	3	1	0	0	0	0	0	0	0	0	0	0	4.62	119	34.3	72
1468	1150415	0	2	41	0	0	0	0	0	0	0	0	0	0	0	0	0	0	0	0	1	1	0	1	0	0	0	0	0	1	0	0	1	3	1	1	0	1	0	0	0	0	0	0	0	36.7	120	36.7	259
1469	1150394	0	1	62	0	1	1	0	0	0	0	1	1	0	0	0	0	0	0	0	1	0	0	1	0	1	0	0	0	1	0	0	1	1	1	0	0	0	0	0	0	0	0	0	0	4.76	138	42.1	468
1470	1150388	1	2	62	0	1	1	0	0	0	0	1	1	0	0	0	0	0	0	0	0	0	0	0	0	0	0	0	0	0	0	1	1	3	1	0	0	0	1	1	0	0	0	1	0	3.17	94	26.6	251
1471	1150372	1	1	88	1	1	1	1	0	1	0	0	0	0	0	0	0	0	0	1	0	0	0	0	0	0	0	0	0	1	1	0	1	3	1	1	1	0	1	1	0	0	0	1	0	3.48	102	34.5	330
1472	1150319	0	2	73	1	1	1	1	0	1	0	0	0	0	0	0	0	0	0	0	0	0	0	0	0	0	0	1	0	1	0	0	1	3	2	0	1	0	0	0	0	0	0	0	0	3.72	112	32.9	197
1473	1150275	1	2	32	0	0	0	0	0	0	0	0	0	0	0	0	0	0	0	0	0	0	0	0	0	1	1	0	0	1	0	1	1	2	2	1	0	0	0	0	0	0	0	0	0	3.2	93	28.1	113
1474	1150271	0	1	48	0	0	0	0	0	0	0	0	1	0	0	0	0	0	0	0	0	0	0	0	0	0	0	0	0	0	1	1	1	1	2	0	0	0	0	0	1	1	0	1	0	3.29	93	28	35
1475	1150269	1	2	46	0	1	0	0	0	0	0	0	0	0	0	0	0	0	0	0	1	0	0	1	0	1	0	0	0	0	1	0	2	1	2	1	0	0	0	1	1	0	0	1	0	4.47	134	41	292
1476	1150254	0	2	32	0	0	1	0	0	0	0	0	1	0	0	0	0	0	0	0	0	0	0	0	0	0	0	0	0	1	1	0	1	2	1	0	0	0	0	0	1	0	0	0	0	7.2	116	35.7	239
1477	1150169	1	2	27	0	1	0	0	0	0	0	0	0	0	0	0	0	0	0	0	0	0	0	0	0	1	0	0	0	0	0	1	2	3	2	0	0	0	0	0	0	1	0	0	0	2.56	78	22.9	30
1478	1150103	0	2	56	0	0	0	0	0	0	0	0	1	1	0	0	0	0	0	0	0	0	0	0	0	0	0	0	0	1	0	0	1	2	1	0	0	0	0	0	1	0	0	0	0	3.37	103	31.2	297
1479	1150024	1	1	56	0	0	0	0	0	0	0	0	0	0	0	0	0	0	0	0	0	0	0	0	0	1	0	0	0	0	0	0	2	1	2	0	0	0	0	0	0	0	0	0	0	3.87	118	36.1	163
1480	1150006	0	1	36	0	0	0	0	0	0	0	0	1	0	0	0	0	0	0	0	0	0	0	0	0	0	0	0	0	0	0	0	3	2	2	0	0	0	0	0	0	0	0	0	0	6.16	155	50.1	198
1481	1149563	0	1	25	0	0	0	0	0	0	0	0	0	0	0	0	0	0	0	0	0	0	0	0	0	0	0	0	0	0	0	0	2	2	1	0	0	0	0	0	0	0	0	0	0	4.74	132	42	166
1482	1149448	0	1	75	1	1	0	0	0	0	0	1	0	0	0	0	0	0	0	0	0	0	1	0	0	0	0	0	1	0	0	1	2	3	1	0	0	0	0	0	0	0	0	0	0	1.8	54	17	143
1483	1149409	0	2	23	0	1	0	0	0	0	0	0	0	0	0	0	0	0	0	0	0	0	0	0	0	0	0	0	0	1	0	0	2	3	1	0	0	1	0	0	0	0	0	0	0	3.12	81	25.4	272
1484	1149072	1	1	83	1	1	0	0	1	1	0	0	0	0	0	0	0	0	0	0	0	0	0	0	0	0	0	0	0	1	0	0	1	3	1	0	1	0	1	1	0	0	0	0	0	2.89	101	29.9	220
1485	1149070	0	2	50	0	0	0	0	0	0	0	0	0	0	0	0	0	0	0	0	0	0	0	0	1	1	0	0	0	1	0	0	1	1	2	0	1	0	0	0	1	0	0	0	0	3.98	118	39	181
1486	1148934	0	1	76	1	1	1	0	0	1	0	1	1	0	0	0	0	0	0	0	0	0	0	0	0	0	0	0	0	0	1	1	1	3	1	1	1	0	0	1	1	0	0	0	0	5.02	152	45.7	283
1487	1148885	0	2	49	0	0	0	0	0	0	0	0	0	0	0	1	0	0	0	0	0	0	0	1	0	0	0	0	0	1	0	1	2	1	2	0	1	0	0	0	0	1	1	0	0	1.98	56	18.3	48
1488	1148813	1	2	63	0	0	0	0	0	1	0	0	0	0	0	0	0	0	0	0	0	0	0	0	1	1	0	0	0	1	0	0	1	3	2	0	1	1	0	0	0	0	0	0	0	2.75	86	26.8	126
1489	1148742	0	2	52	0	1	0	0	0	0	0	0	0	0	0	0	0	0	0	0	1	1	0	1	0	0	0	0	0	1	0	0	4	2	1	1	0	0	0	0	1	0	0	0	0	4.27	131	40.6	237
1490	1148681	0	1	59	0	1	0	0	0	0	0	0	1	1	0	0	0	0	0	0	0	0	0	0	0	0	0	0	0	1	0	0	3	3	1	1	1	0	0	0	1	0	0	0	0	4.79	144	43.4	226
1491	1148336	0	1	49	0	0	0	0	0	0	0	0	0	0	0	0	0	0	0	0	0	0	0	0	0	0	1	0	0	0	0	0	1	3	1	1	1	1	0	1	1	0	0	1	0	4.4	140	42.2	159
1492	1148278	1	1	44	0	0	0	0	0	0	0	0	0	0	0	0	0	0	0	0	0	0	0	0	0	1	1	0	0	0	0	0	3	2	2	1	0	1	0	0	0	1	0	0	0	3.59	109	32.3	26
1493	1148168	0	2	49	0	0	0	0	0	0	0	0	0	0	0	0	1	0	0	0	0	0	0	1	0	1	0	0	0	1	0	0	1	2	2	0	0	0	0	0	0	0	0	0	0	6.4	99	32	220
1494	1148118	0	2	42	0	1	1	1	0	0	1	0	0	0	0	0	0	0	0	0	1	0	0	1	0	0	0	0	0	0	0	1	2	3	1	1	0	0	0	0	0	0	0	0	0	2.62	85	25.8	291
1495	1147908	1	1	60	0	0	0	0	0	0	0	0	0	0	1	0	0	0	0	0	1	0	0	1	0	1	1	0	0	0	0	0	1	2	2	1	0	1	1	1	1	0	0	1	0	5.04	170	48.3	174
1496	1147791	0	2	27	0	0	0	0	0	0	0	1	0	0	0	0	0	0	0	0	0	0	0	0	0	1	0	0	0	0	0	0	1	1	2	0	0	1	0	1	1	0	0	1	0	3.4	94	28.4	416
1497	1147783	1	1	52	0	0	0	0	0	1	0	0	0	0	0	0	0	0	0	0	0	0	0	0	0	1	0	0	0	1	0	1	1	2	2	1	1	0	0	0	0	0	0	0	0	2.93	85	25.9	90
1498	1147648	1	1	62	0	0	0	0	0	0	0	0	1	1	0	0	0	0	0	0	1	0	0	1	0	1	0	0	0	0	0	0	4	1	2	0	0	0	0	0	0	0	0	0	0	3.92	123	37.5	465
1499	1147593	1	1	67	1	1	0	0	0	0	0	1	0	0	0	0	0	0	0	0	0	0	0	0	0	1	1	0	0	1	0	0	1	2	2	0	0	1	1	1	1	1	1	1	0	2.18	68	19.9	32
1500	1147554	1	1	68	1	1	0	0	0	0	0	0	0	0	0	0	0	0	0	0	0	0	0	0	0	1	0	0	0	1	0	0	1	2	2	0	0	0	1	1	0	0	0	1	0	4.17	141	40.8	302
1501	1147421	0	2	84	1	0	0	0	0	0	0	0	0	0	0	0	0	0	0	0	1	0	0	1	0	0	0	0	0	0	1	0	1	1	2	0	0	0	0	0	1	0	0	0	0	3.54	117	34.7	145
1502	1147394	1	1	67	1	0	0	0	0	0	0	0	1	0	0	0	0	0	0	0	0	0	0	0	0	0	0	0	0	0	1	0	1	3	2	1	0	1	1	1	1	0	1	1	0	3.31	109	33.2	109
1503	1146949	0	1	47	0	0	0	0	0	0	0	0	0	0	0	0	0	0	0	0	1	0	0	1	0	1	0	0	0	1	0	0	2	1	2	0	0	0	0	0	0	0	0	0	0	4.14	123	36.9	203
1504	1146931	0	1	55	0	0	0	0	0	0	0	0	1	1	0	0	0	0	0	0	1	0	0	1	0	0	0	0	0	0	1	1	1	1	2	0	0	1	0	0	1	0	0	0	0	2.33	80	23.7	140
1505	1146893	0	2	27	0	0	0	0	0	0	0	0	1	0	0	0	0	0	0	0	0	0	0	0	0	0	0	0	0	1	1	1	1	2	2	0	0	0	0	0	1	0	0	1	0	2.62	73	22.9	169
1506	1146865	0	1	58	0	0	0	0	0	1	0	0	1	0	0	0	0	0	0	1	0	0	0	0	0	0	0	0	0	1	0	0	1	1	1	0	1	0	0	0	0	0	0	0	0	3.53	166	33	77
1507	1146724	0	1	44	0	0	0	0	0	0	0	0	1	0	0	0	0	0	0	0	0	0	0	0	0	0	0	0	0	1	0	0	2	3	1	0	0	0	0	1	0	0	0	0	0	8.4	119	33.7	106
1508	1146652	0	1	52	0	0	0	0	0	0	0	0	1	1	0	0	0	0	0	0	1	0	1	1	0	1	0	0	0	1	1	1	2	1	2	0	0	0	0	0	1	0	0	0	0	3.51	108	33.3	103
1509	1146588	0	1	47	0	0	0	0	0	0	0	0	0	0	0	0	0	0	0	0	0	0	0	0	0	0	0	0	0	1	0	0	2	3	1	1	0	0	0	0	0	1	0	0	0	4.53	136	40	28
1510	1146573	0	2	65	1	0	0	0	0	0	0	0	0	0	0	0	0	0	0	0	1	0	0	1	0	1	0	0	0	1	0	1	1	2	2	0	0	0	0	0	0	0	0	1	0	2.62	88	25.6	87
1511	1146557	0	1	64	0	0	0	0	0	0	0	0	0	0	0	0	0	0	0	0	0	0	0	0	0	1	0	0	0	0	0	0	3	1	2	0	0	0	0	0	0	0	0	0	0	3.81	128	38.4	199
1512	1146552	0	1	62	0	0	0	0	0	1	0	0	0	0	0	0	0	0	0	0	0	0	0	0	0	0	0	0	0	1	0	0	1	2	2	0	1	0	0	0	0	0	0	0	0	3.51	115	34.2	160
1513	1146460	0	1	49	0	0	0	0	0	0	0	0	1	0	0	0	0	0	0	0	0	0	0	0	0	0	1	0	999	0	1	0	1	2	1	0	0	0	0	0	0	0	0	0	0	16	76	23.6	419
1514	1146280	1	1	24	0	0	0	0	0	0	0	0	0	0	0	0	0	0	0	0	0	0	0	0	0	0	0	0	0	0	0	0	1	1	2	0	0	0	0	0	0	0	0	1	0	3.63	123	35.8	96
1515	1146278	0	1	49	0	0	0	0	0	0	0	0	1	1	0	0	0	0	0	0	0	0	0	0	0	0	0	0	0	0	0	0	1	1	2	0	0	0	0	0	1	1	0	0	0	4.9	98	27.5	29
1516	1146257	0	1	58	0	0	0	0	0	0	0	0	0	0	0	0	0	0	0	0	1	0	0	1	0	0	1	0	0	1	0	0	1	2	1	0	0	0	0	0	1	0	0	0	0	4.26	115	34.8	354
1517	1146187	0	2	42	0	0	0	0	0	0	0	0	1	0	0	0	0	0	0	0	1	0	0	1	0	0	0	0	0	0	1	0	2	1	2	0	0	1	0	0	1	0	0	0	0	3.29	130	30.6	130
1518	1146179	0	1	34	0	0	0	0	0	0	0	0	0	0	0	0	0	0	0	0	0	0	0	0	1	1	0	0	0	1	1	1	1	3	2	1	1	0	0	1	1	1	0	0	0	5.61	101	37.6	44
1519	1145903	0	2	23	0	0	0	0	0	0	0	0	1	0	0	0	0	0	0	0	0	0	0	0	0	0	0	0	0	1	0	0	1	3	1	0	0	0	0	0	1	0	0	0	0	4.24	129	38.4	299
1520	1145841	0	1	56	0	0	0	0	0	0	0	0	1	0	0	0	0	0	0	0	0	0	0	0	0	0	0	0	1	0	0	0	2	3	1	0	0	1	0	0	1	0	0	0	0	5.2	153	44.9	110
1521	1145687	0	2	45	0	0	0	0	0	0	0	0	1	0	0	0	0	0	0	0	0	0	0	0	0	1	0	0	0	0	0	1	2	2	2	0	0	0	0	0	0	0	0	0	0	2.6	84	25	296
1522	1145643	0	1	40	0	0	0	0	0	0	0	0	1	0	0	0	0	0	0	0	1	0	0	1	0	1	0	0	0	0	0	0	1	2	2	0	0	0	0	0	0	0	0	0	0	4.22	128	37.8	168
1523	1145397	0	1	23	0	0	0	0	0	0	0	0	0	0	0	0	0	0	0	0	0	0	0	0	0	1	0	0	0	0	0	0	1	3	2	0	0	0	0	0	0	0	0	0	0	4.01	115	35.4	115
1524	1145394	0	1	46	0	0	1	0	0	0	0	0	1	1	0	0	0	0	0	0	0	0	0	0	0	0	0	0	0	0	1	1	1	1	1	0	0	0	0	0	1	0	0	0	0	15.4	128	37.9	333
1525	1145361	0	1	78	1	1	0	0	0	0	0	0	0	0	0	0	0	0	0	0	1	0	0	1	0	1	0	0	0	1	0	0	1	2	2	1	0	0	0	0	0	0	0	0	0	3.24	89	26.9	357
1526	1145317	1	1	62	0	0	0	0	0	0	1	0	1	1	0	0	0	0	0	0	0	0	0	0	0	1	0	0	0	0	1	1	1	2	2	0	0	0	0	0	1	0	0	0	0	1.84	66	20.4	75
1527	1145196	0	1	37	0	0	0	0	0	0	1	0	0	0	0	0	0	0	0	0	0	0	0	0	0	0	0	0	0	0	0	0	2	3	2	1	0	0	1	0	0	1	0	0	0	2.85	83	24.5	44
1528	1145115	1	1	51	0	0	0	0	0	0	0	0	0	0	0	0	0	0	0	0	0	0	0	0	0	0	1	0	1	1	1	0	1	2	1	0	0	0	0	0	0	0	0	0	0	3.12	93	27.8	317
1529	1144866	0	2	26	0	0	0	0	0	0	0	0	1	1	0	0	0	0	0	0	0	0	0	0	0	0	1	0	0	0	0	1	1	2	2	0	0	1	0	0	1	0	0	1	0	2.31	59	31	78
1530	1144721	0	2	65	1	1	1	0	0	0	0	0	0	0	0	0	0	0	0	0	1	0	0	1	0	0	0	0	0	0	0	0	4	1	1	0	0	0	0	0	0	0	0	0	0	3.37	98	32.7	348
1531	1144630	1	1	47	0	0	1	0	0	0	0	0	1	0	0	0	0	0	0	0	0	0	1	0	0	1	0	0	0	0	1	1	1	1	2	0	0	0	0	0	0	0	0	0	0	3.36	108	34.8	268
1532	1144368	1	1	24	0	0	0	0	0	0	0	1	0	0	0	0	0	0	0	0	0	0	0	0	0	1	0	0	0	0	0	0	1	1	2	0	0	1	0	0	0	0	0	1	0	4.31	126	37.6	316
1533	1144011	0	1	57	0	0	0	0	0	0	0	0	0	0	0	0	0	0	0	0	0	0	0	0	0	0	0	0	0	0	0	0	4	2	2	0	0	0	0	0	0	0	0	0	0	3.49	118	34.2	142
1534	1143928	1	1	59	0	0	0	0	0	0	0	0	0	0	0	0	0	0	0	0	1	0	0	1	0	1	0	0	0	0	0	1	1	1	2	0	0	0	0	0	0	0	0	0	0	3.06	95	27.8	168
1535	1143865	0	1	62	0	1	0	0	0	1	0	0	1	0	0	0	0	0	0	0	1	0	0	1	0	1	0	0	0	0	0	0	1	1	2	0	0	0	0	0	0	0	0	0	0	4.8	121	38.1	188
1536	1143730	0	1	42	0	0	0	0	0	0	1	0	1	0	0	0	0	0	0	0	1	0	0	1	1	1	0	0	0	0	0	1	2	1	2	0	0	0	0	0	0	0	1	0	0	3.37	95	30.8	333
1537	1143592	0	1	73	1	1	0	0	0	0	0	0	0	0	0	0	0	0	0	1	0	0	0	0	0	0	0	0	0	0	0	1	1	1	2	0	0	0	0	0	0	0	0	0	0	3.05	89	29.3	260
1538	1143373	1	2	50	0	0	0	0	0	0	0	0	0	0	0	0	0	0	0	0	0	0	0	0	0	1	0	0	0	1	0	1	1	2	2	0	0	1	0	0	1	0	0	1	0	7.4	76	22.9	182
1539	1143225	0	1	44	0	0	0	0	0	0	0	0	0	0	0	1	0	0	0	0	0	0	0	1	0	0	0	0	0	0	0	1	2	3	2	0	0	0	0	0	0	1	0	0	0	1.72	60	17.4	16
1540	1143157	0	1	51	0	0	0	0	0	0	0	0	0	0	0	0	0	0	0	0	0	0	0	0	0	1	0	0	0	1	0	0	3	3	1	0	0	0	0	0	0	0	0	0	0	3.74	118	34.2	229
1541	1142982	1	1	23	0	0	0	0	0	0	0	0	0	0	0	0	0	0	0	0	0	0	0	0	1	1	0	0	0	1	0	0	1	2	2	1	1	1	1	1	1	1	0	0	0	5.35	158	47.9	49
1542	1142359	0	2	85	1	1	0	0	0	0	0	0	1	0	0	0	1	0	0	0	0	0	0	1	0	0	0	0	0	1	1	1	2	3	2	0	0	0	0	0	0	0	0	0	0	3.58	97	28.6	206
1543	1142241	1	2	26	0	0	1	0	0	0	0	0	1	0	0	0	0	0	0	0	0	0	0	0	0	1	0	0	1	1	1	0	1	1	2	1	0	1	0	0	0	1	0	1	0	3.35	110	33.2	57
1544	1142089	1	1	63	0	0	0	0	0	0	0	0	1	0	0	0	0	0	0	0	0	0	0	0	0	1	1	0	0	1	0	1	1	3	1	1	0	0	0	0	1	0	0	0	0	2.67	68	21	206
1545	1141900	0	1	70	1	0	0	0	0	1	0	1	0	0	0	0	0	0	0	0	0	0	0	0	1	1	0	0	0	1	0	0	2	2	1	0	1	0	0	0	0	0	0	1	0	4	125	37.3	103
1546	1141881	0	1	73	1	1	0	0	1	0	1	0	1	0	0	0	0	0	0	0	0	0	0	0	0	0	0	0	0	0	0	0	2	3	2	1	0	0	0	0	0	0	0	0	0	2.87	83	24.5	264
1547	1141811	0	2	61	0	1	1	0	0	0	0	0	1	1	0	0	0	0	0	0	1	1	0	1	0	1	1	0	0	1	1	0	1	1	2	0	0	0	0	0	1	0	0	0	0	2.75	103	30.8	213
1548	1141577	1	2	24	0	0	0	0	1	1	0	0	0	0	0	0	0	0	0	0	0	0	0	0	1	1	0	0	0	0	0	1	1	2	2	0	1	1	0	0	0	0	0	0	0	3.56	101	31.7	185
1549	1138666	0	2	53	0	0	1	0	0	0	1	1	0	0	0	0	0	0	0	0	1	0	0	1	0	0	0	0	0	1	0	0	2	1	2	0	0	0	0	0	0	0	0	0	0	4.51	124	38.2	240
1550	1137256	0	1	39	0	0	0	0	0	0	0	0	0	0	0	1	0	0	0	0	0	0	0	1	0	0	0	0	0	1	0	0	2	1	2	0	0	0	0	0	0	0	0	0	0	3.46	105	34.3	74
1551	1136476	0	1	66	1	0	0	0	0	0	0	0	0	0	0	0	0	0	0	0	1	0	0	1	0	1	0	1	0	1	1	1	1	3	2	0	0	0	0	0	0	0	0	0	0	2.19	61	19.5	336
1552	1134035	1	2	65	1	0	0	0	0	0	0	0	0	0	0	0	0	0	0	0	0	0	0	0	0	1	0	0	0	0	0	1	1	2	2	0	0	1	0	0	0	0	0	0	0	2.45	72	22.3	197
1553	1133474	1	1	68	1	0	0	0	0	1	0	0	1	0	0	0	0	0	0	0	0	0	0	0	0	0	1	0	0	1	0	0	1	2	2	1	1	1	0	1	1	1	0	1	0	4.1	132	39.5	37
1554	1130490	1	1	60	0	0	0	0	0	1	0	0	0	0	1	1	0	0	0	0	0	0	0	1	0	1	0	0	0	1	0	1	1	1	1	0	1	0	0	0	0	0	0	0	0	3.66	75	24.8	181
1555	1130347	0	1	50	0	0	0	0	0	0	1	0	1	0	0	0	0	0	0	0	0	0	0	0	0	0	0	0	0	0	0	1	2	2	2	0	0	0	0	0	0	0	0	0	0	2.97	73	22.3	128
1556	1130133	0	2	45	0	0	0	0	0	0	0	0	0	0	0	0	0	0	0	0	1	0	0	1	0	0	0	0	0	0	0	0	2	1	2	0	0	0	0	0	1	0	0	0	0	3.27	105	32.4	231
1557	1129564	0	2	38	0	0	0	0	0	0	0	0	0	0	0	0	0	0	0	0	1	0	0	1	0	0	0	0	0	0	0	0	2	1	1	0	0	0	0	0	0	0	0	0	0	3.96	119	37.6	331
1558	1129374	0	2	57	0	0	0	0	0	0	0	0	0	0	0	0	0	0	0	0	0	0	0	0	0	1	0	0	0	0	0	0	1	1	2	0	0	0	0	0	0	0	0	0	0	5.04	108	36.1	257
1559	1127972	0	1	33	0	1	0	0	0	0	0	0	0	0	0	0	0	0	0	0	0	0	0	0	0	1	0	0	0	1	0	0	1	2	2	0	0	0	0	0	0	0	0	0	0	5.44	154	46.1	342
1560	1127525	0	2	57	0	0	0	0	0	0	0	0	0	0	0	0	0	0	0	0	1	0	0	1	0	0	0	0	0	0	0	0	2	1	1	0	0	0	0	0	0	0	0	0	0	3.86	124	38.4	75
1561	1127293	0	2	45	0	0	0	0	0	0	0	0	0	0	0	0	0	0	0	0	0	0	0	0	0	0	0	0	0	1	0	0	3	3	1	0	0	0	0	0	0	0	0	0	0	3.68	109	32.7	193
1562	1126640	0	2	61	0	0	1	0	0	0	0	0	0	0	0	0	0	0	0	0	1	0	0	1	0	0	0	0	0	0	0	0	2	1	2	0	0	0	0	0	0	0	0	0	0	3.92	105	33.5	98
1563	1125180	1	2	36	0	0	0	0	0	0	0	0	0	0	1	0	0	0	0	0	0	0	0	0	0	0	0	0	0	1	0	1	2	3	2	0	0	0	1	1	0	0	0	0	0	2.94	89	26.9	71
1564	1122549	0	1	58	0	1	1	0	0	0	0	0	0	0	0	0	0	0	0	0	0	0	0	0	0	0	0	0	0	0	0	0	1	1	1	0	0	0	0	0	0	0	0	0	0	4.47	121	33	234
1565	1122466	0	2	42	0	0	0	0	0	0	0	0	0	0	0	0	0	0	0	0	1	0	0	1	0	1	0	0	0	0	0	0	2	1	2	0	0	0	0	0	0	0	0	0	0	3.95	119	36.6	309
1566	1122189	0	1	65	1	1	0	0	0	0	0	0	0	0	0	0	0	0	0	0	1	0	0	1	0	0	0	0	0	1	0	0	1	1	1	0	0	0	0	0	0	0	0	1	0	4.85	136	46.3	251
1567	1122039	1	1	42	0	1	1	0	0	1	0	0	0	0	0	0	0	0	0	0	1	0	0	1	0	1	0	0	0	1	0	0	1	1	2	0	0	1	0	0	0	0	0	0	0	4.23	130	39.1	316
1568	1119614	0	2	42	0	1	0	0	0	0	0	0	0	0	0	0	0	0	0	0	1	0	0	1	0	1	0	0	0	0	0	0	2	1	2	0	0	0	0	0	1	0	0	0	0	2.8	102	29.8	141
1569	1118226	1	1	45	0	0	0	0	0	0	0	0	1	1	0	0	0	0	0	0	1	1	0	1	0	1	0	0	0	1	0	0	1	2	2	0	0	0	0	0	0	0	0	0	0	5.45	136	43.4	120
1570	1117828	0	2	34	0	0	0	0	0	0	0	0	0	0	0	0	0	0	0	0	1	0	0	1	0	0	0	0	0	0	0	0	2	1	2	0	0	0	0	0	0	0	0	0	0	3.41	112	32.2	163
1571	1116782	0	1	31	0	0	1	0	0	0	0	0	0	0	0	0	0	0	0	0	0	0	0	0	0	0	0	0	0	0	0	1	2	3	2	0	0	0	0	0	0	0	0	0	0	2.05	73	20.9	161
1572	1115726	0	2	72	1	1	0	0	0	0	0	1	1	0	0	0	0	0	0	0	0	0	0	0	0	0	0	0	0	0	0	0	4	2	1	0	0	0	0	0	0	0	0	0	0	3.57	111	35.1	161
1573	1115367	0	2	52	0	0	0	0	0	0	0	0	0	0	0	0	1	0	0	0	0	0	0	1	0	1	0	0	0	0	0	1	2	2	2	0	0	0	0	0	0	0	0	0	0	2.98	80	26.3	84
1574	1113075	0	1	44	0	0	1	0	0	0	0	0	1	1	0	0	0	0	0	0	0	0	1	0	0	0	0	0	0	1	0	0	1	3	2	1	0	0	0	0	1	0	0	1	0	3.04	107	30.9	77
1575	1111542	0	2	59	0	0	0	0	0	0	0	0	0	0	0	0	0	0	0	0	1	0	0	1	0	1	0	0	0	0	0	0	1	1	2	0	0	0	0	0	0	0	0	0	0	4.09	131	38.2	121
1576	1107407	0	2	52	0	0	0	0	0	0	0	0	0	0	0	0	0	0	0	0	0	0	0	0	0	1	1	1	0	0	0	0	2	3	2	1	0	1	0	1	1	1	0	1	0	3.42	102	28.6	55
1577	1107319	0	2	76	1	0	1	0	0	1	0	0	0	0	0	0	0	0	0	1	0	0	0	0	0	1	0	1	0	0	0	1	1	3	1	0	1	0	0	0	0	1	0	0	0	2.27	70	23.2	45
1578	1105143	0	1	69	1	0	1	0	0	0	0	0	0	0	0	0	0	0	0	0	0	0	0	0	1	1	0	0	0	1	0	1	1	3	2	0	1	1	1	1	1	0	0	1	0	2.64	72	22.6	183
1579	1105133	1	1	57	0	0	0	0	0	1	0	0	0	0	0	0	0	0	0	0	0	0	0	0	1	1	0	0	0	0	0	0	1	1	2	0	1	0	0	0	0	0	0	0	0	4.55	132	33	61
1580	1104544	1	1	64	0	1	1	0	0	0	0	1	0	0	0	0	0	0	0	0	0	0	0	0	0	0	0	0	0	0	0	0	1	2	1	0	0	0	0	0	1	0	0	1	0	3.42	107	35.5	199
1581	1094969	1	2	71	1	1	0	0	0	1	0	0	0	0	0	0	0	0	0	0	0	0	0	0	0	1	0	0	0	1	0	0	1	2	1	0	1	0	0	0	0	0	0	0	0	3.58	105	34.8	133
1582	1094930	0	1	75	1	0	0	0	0	0	0	0	0	0	0	0	0	0	0	1	0	0	0	0	0	0	1	0	0	0	1	0	1	2	1	1	0	1	1	1	0	0	0	0	0	3.19	98	29.4	94
1583	1089720	0	1	22	0	0	1	0	0	0	0	0	0	0	0	0	0	0	0	0	0	0	0	0	0	0	0	0	0	1	0	0	2	1	1	1	0	0	0	0	0	0	0	0	0	6.04	174	33	289
1584	1083222	0	1	83	1	1	1	1	0	0	0	0	0	0	0	0	0	0	0	1	1	0	0	1	0	0	0	0	0	1	0	0	2	3	1	0	0	0	0	0	0	0	0	0	0	3.11	104	31.2	92
1585	1077161	0	1	70	1	1	1	1	0	0	0	0	0	0	0	0	0	0	0	0	0	0	0	0	0	1	0	0	0	1	0	0	1	2	2	0	0	0	0	0	0	0	0	0	0	4.66	113	35.7	134
1586	1071085	1	1	71	1	0	0	0	0	0	0	0	1	1	0	0	0	0	0	0	0	0	0	0	0	0	0	0	0	0	1	0	1	2	1	1	0	1	1	1	1	1	0	1	0	2.8	101	26.9	15
1587	1069854	0	1	64	0	1	0	0	0	1	0	0	0	0	0	0	0	0	0	1	0	0	0	0	1	1	0	0	0	0	0	1	1	2	2	0	1	1	1	1	1	0	0	1	0	2.19	66	21.4	105
1588	1068283	0	1	25	0	0	0	0	0	0	0	0	0	0	0	0	0	0	0	0	0	0	0	0	0	1	0	0	0	0	0	1	1	1	2	0	0	0	0	0	0	0	0	0	0	3.31	95	29.9	465
1589	1061165	0	1	43	0	0	1	0	0	0	0	0	0	0	0	0	1	0	0	0	0	0	0	1	0	0	0	0	0	1	1	1	2	2	1	0	0	0	0	0	0	1	0	1	0	2.97	86	26	57
1590	1058144	0	1	41	0	0	0	0	0	0	0	0	0	0	0	1	0	0	0	0	0	0	0	1	0	0	0	0	0	0	0	1	2	3	2	1	0	0	0	0	0	0	0	0	0	3.73	106	32.2	124
1591	1055781	0	1	56	0	0	0	0	0	0	0	0	0	0	0	0	0	0	0	0	1	1	0	1	0	0	0	0	0	0	0	0	2	1	2	0	0	0	0	0	0	0	0	0	0	4.53	169	50.3	319
1592	1045492	0	1	52	0	0	0	0	0	1	0	0	0	0	0	0	0	0	0	0	0	0	0	0	0	0	0	0	0	1	0	0	1	1	2	1	1	0	0	0	0	0	0	0	0	5.16	163	51	335
1593	1035639	0	1	48	0	1	0	0	0	0	0	0	0	0	0	0	0	0	0	0	1	0	0	1	0	1	1	0	0	0	0	1	1	2	2	0	0	1	1	1	0	0	0	0	0	27.6	90	27.6	414
1594	1009485	0	1	35	0	0	0	0	0	0	0	0	0	0	0	0	0	0	0	0	1	0	0	1	0	1	0	0	0	0	0	0	1	1	2	0	0	0	0	0	0	0	0	0	0	4.47	137	40.7	151
1595	991096	1	2	45	0	0	0	0	0	0	0	1	0	0	0	0	0	0	0	0	0	0	0	0	1	1	0	0	0	0	0	0	1	1	2	1	0	0	0	0	1	0	0	0	0	4.36	128	38.9	141
1596	988636	0	1	74	1	0	1	1	0	0	0	0	0	0	0	0	0	0	0	0	0	0	0	0	0	0	0	0	0	1	0	1	2	3	1	1	0	0	0	0	0	0	0	0	0	3.2	94	29.1	118
1597	980754	0	2	72	1	1	1	1	1	1	1	1	0	0	0	0	0	0	0	0	0	0	0	0	0	0	0	0	0	0	1	1	2	3	1	0	0	0	0	0	0	0	0	0	0	3.02	85	26.1	96
1598	963845	1	2	36	0	0	0	0	0	0	1	0	1	0	1	0	0	0	0	0	0	0	0	0	0	0	0	0	0	1	0	1	2	2	1	1	0	0	1	1	1	0	0	0	0	4.13	113	34.7	124
1599	961616	0	1	76	1	1	0	0	1	0	0	1	0	0	0	0	0	0	0	0	0	0	0	0	0	0	0	0	0	0	0	0	1	3	2	1	1	1	1	1	0	0	0	1	0	3.27	93	30.6	180
1600	958136	0	1	71	1	0	0	0	0	0	0	1	1	1	0	0	0	0	0	0	0	0	0	0	0	0	0	0	0	1	1	1	1	3	1	0	0	0	0	0	1	0	0	0	0	3.07	76	24	157
1601	944347	1	1	79	1	0	0	0	0	0	0	0	0	0	0	0	0	0	0	1	1	0	0	1	0	0	1	1	0	0	1	1	1	2	2	1	0	1	1	1	0	1	0	1	0	2.5	74	23.3	56
1602	923021	1	1	87	1	0	0	0	0	0	0	0	1	0	0	0	0	1	0	0	0	0	0	0	0	0	0	0	0	0	1	1	1	1	1	1	0	0	0	0	0	0	0	0	0	2.54	79	24.6	186
1603	848200	0	2	63	0	0	0	0	0	0	0	0	0	0	0	0	0	0	0	0	1	0	0	1	0	1	0	0	0	0	0	0	1	1	2	0	0	0	0	0	0	0	0	0	0	2.54	76	23.7	134
1604	776801	0	2	64	0	0	0	0	0	0	0	0	0	0	0	0	0	0	0	0	0	0	0	0	0	0	0	0	1	1	0	0	3	3	1	0	0	0	0	0	0	0	0	0	0	4.25	124	38.1	206
1605	1107631	0	1	48	0	0	0	0	0	0	0	0	1	0	0	0	0	0	0	0	0	0	0	0	0	0	0	0	0	1	0	0	2	3	1	0	0	0	0	0	0	0	0	0	0	4.36	124	37.6	149
1606	1109954	0	1	45	0	0	0	0	0	0	0	0	0	0	0	0	0	0	0	0	0	0	0	0	0	0	0	0	1	1	1	0	2	2	1	0	0	0	0	0	0	0	0	0	0	3.5	106	32.8	250
1607	1110770	0	1	48	0	0	0	0	0	0	0	0	1	0	0	0	0	0	0	0	0	0	0	0	0	0	0	0	0	1	0	0	4	3	1	1	0	0	0	0	0	0	0	0	0	3.61	113	32.9	194
1608	1110827	0	2	81	1	0	0	0	0	0	0	0	0	0	0	0	0	0	0	0	1	0	0	1	0	0	0	0	1	0	1	0	1	3	1	1	1	1	0	0	0	0	0	0	1	5.5	158	45.8	242
1609	1092347	1	1	77	1	1	0	0	0	0	0	0	0	0	0	0	0	0	0	0	1	1	0	1	0	0	0	0	0	0	1	1	2	2	1	0	0	0	0	0	0	0	0	0	0	3.09	89	29.9	522
1610	1100710	1	2	32	0	0	0	0	0	1	0	0	0	0	1	0	0	0	0	0	0	0	0	0	0	1	0	0	1	1	1	1	2	3	1	1	1	0	1	1	0	0	0	0	1	3.34	102	31.4	205
1611	1087994	0	2	26	0	0	1	0	0	0	0	0	0	0	0	0	0	0	0	0	0	0	0	0	0	0	0	0	0	1	0	1	1	3	1	1	0	0	0	0	0	0	1	0	0	4.85	137	41.6	124
1612	1113206	0	1	75	1	0	0	0	1	1	0	0	0	0	0	0	0	0	0	0	0	0	0	0	0	0	0	0	0	1	0	0	2	1	1	0	1	0	0	0	0	0	0	0	0	4.18	126	38.4	110
1613	1108290	0	2	48	0	0	1	0	0	0	0	0	0	0	0	0	0	0	0	0	1	1	0	1	0	0	1	0	0	1	0	1	1	3	2	0	0	0	0	0	0	0	0	0	0	3.42	93	28.1	148
1614	1113930	0	2	60	0	0	1	0	0	0	0	0	1	0	0	0	0	0	0	0	0	0	0	0	0	0	0	0	1	0	1	0	1	2	1	0	0	0	0	0	0	0	0	0	0	4.47	141	31.5	416
1615	1113133	0	1	77	1	0	0	0	0	0	0	0	0	0	0	0	0	0	0	0	1	0	0	1	0	0	0	0	1	1	1	0	2	3	1	0	0	0	0	0	0	0	0	0	0	4.74	134	40.3	255
1616	1116119	0	2	72	1	0	0	0	0	0	0	0	1	0	0	0	0	0	0	0	1	1	0	1	0	0	1	0	0	1	1	1	1	3	1	1	0	0	0	0	0	0	0	0	0	3.56	99	30.8	358
1617	1112567	1	1	44	0	0	1	0	0	0	0	0	1	0	0	0	0	0	0	0	0	0	0	0	0	0	1	0	0	1	0	0	1	3	1	1	1	0	0	0	1	0	0	0	1	5	154	47.7	137
1618	1116915	0	2	68	1	1	0	0	0	0	0	0	0	0	0	0	0	0	0	0	0	0	0	0	0	0	0	0	1	1	0	0	2	2	1	0	0	0	0	0	0	0	0	0	0	3.35	106	30.3	127
1619	1115103	0	1	74	1	1	1	0	0	0	0	0	0	0	0	0	0	0	0	1	0	0	0	0	0	0	0	0	0	1	1	0	2	3	1	0	0	0	0	0	0	0	0	0	0	4.12	120	35.1	78
1620	1094585	0	1	65	1	0	0	0	0	0	1	0	0	0	0	0	0	0	0	0	0	0	0	0	0	0	0	0	1	1	1	0	2	2	1	0	0	0	0	0	0	0	0	0	0	3.86	116	36.3	157
1621	1112812	0	1	64	0	0	0	0	0	0	0	0	1	0	0	0	0	0	0	0	0	0	0	0	0	1	0	0	0	0	0	0	3	3	2	0	0	0	0	0	1	0	0	1	1	3.65	115	37.7	177
1622	1113289	0	2	27	0	0	0	0	0	0	0	0	0	0	0	0	0	0	0	0	0	0	0	0	0	0	0	0	0	1	0	0	1	3	2	1	0	0	0	0	0	0	0	1	1	3.33	104	29.4	189
1623	1119282	0	2	36	0	0	0	0	0	0	0	0	1	0	0	0	0	0	0	0	0	0	0	0	0	0	0	0	0	1	0	0	2	3	1	1	0	0	0	0	1	0	1	1	1	3.94	105	30.8	163
1624	1120695	0	1	16	0	0	0	0	0	0	0	0	0	0	0	0	0	0	0	0	0	0	0	0	0	0	0	0	1	1	1	0	1	2	1	0	0	0	0	0	0	0	0	0	0	5.02	151	42.6	307
1625	1117292	0	2	58	0	0	0	0	0	0	0	0	1	0	0	0	0	0	0	0	0	0	0	0	0	0	0	0	1	0	1	0	1	2	2	0	0	1	0	0	1	0	0	0	1	3	110	31.5	138
1626	1028080	0	1	62	0	1	0	0	0	0	0	0	0	0	0	0	0	0	0	0	1	0	0	1	0	0	0	0	0	1	0	0	3	3	1	0	0	0	0	0	0	0	0	0	0	4.1	125	35.8	185
1627	1117639	0	2	48	0	1	1	0	0	0	0	0	1	0	0	0	0	0	0	0	0	0	0	0	0	0	0	0	0	1	1	1	4	3	1	0	1	0	0	0	0	0	0	0	0	3.86	108	31.1	216
1628		0	1	84	1	1	0	0	0	0	0	0	1	0	0	0	0	0	0	0	0	0	0	0	0	0	0	0	0	1	0	0	3	3	1	0	0	0	0	0	0	0	0	0	0	3.68	115	34.2	172
1629	1122203	0	1	71	1	1	0	0	0	0	0	1	0	0	0	0	0	0	0	0	0	0	0	0	0	0	0	0	0	1	0	1	4	2	2	1	1	1	1	1	0	0	1	1	1	3.47	96	29.5	133
1630	1118956	0	1	81	1	0	0	0	0	0	0	0	0	0	0	0	0	0	0	1	0	0	0	0	0	0	0	0	0	1	1	0	3	2	1	1	1	0	1	0	0	0	0	0	1	4.16	125	40.6	71
1631	1120346	0	1	18	0	0	0	0	0	0	0	0	0	0	0	0	0	0	0	0	0	0	0	0	0	0	0	0	0	1	0	0	3	3	1	0	0	0	0	0	0	0	0	0	0	3.91	119	34.7	407
1632	1017260	0	2	56	0	0	1	0	0	0	0	0	0	0	0	0	0	0	0	0	1	1	0	1	0	0	0	0	0	1	1	1	4	3	2	1	0	0	0	0	0	0	0	0	0	4.6	84	25.9	295
1633	1125818	0	1	45	0	0	0	0	0	0	1	0	0	0	0	0	0	0	0	0	0	0	0	0	0	0	0	0	0	1	0	1	2	3	1	0	1	0	0	0	0	0	0	0	1	3.03	91	25	109
1634	1129243	0	2	78	1	1	0	0	0	1	0	0	1	1	0	0	0	0	0	0	0	0	0	0	0	0	0	0	0	1	1	0	4	3	1	1	1	0	0	0	0	0	0	0	1	4.19	109	32.5	127
1635	1125516	0	2	48	0	0	0	0	0	0	1	0	0	0	0	0	0	0	0	0	1	1	0	1	0	0	0	0	1	1	0	0	3	3	1	1	0	0	0	0	0	0	0	0	0	4	112	33.8	265
1636	462501	0	1	73	1	1	1	0	0	0	0	0	0	0	0	0	0	0	0	0	0	0	0	0	0	0	0	0	0	1	1	1	2	3	2	1	0	0	0	0	0	0	0	0	0	3.37	95	29.1	155
1637	1130714	0	2	49	0	1	0	0	0	0	0	0	1	0	0	0	0	0	0	0	0	0	0	0	0	0	0	0	0	0	0	1	2	3	1	0	0	0	0	0	0	0	0	0	0	4.17	103	30.8	256
1638	1116148	1	2	59	0	0	1	0	0	0	0	0	0	0	0	0	0	0	0	0	0	0	0	0	0	0	0	0	0	0	0	0	1	1	2	1	0	1	0	1	1	0	0	0	1	5.11	160	35.3	99
1639	1000783	1	1	39	0	0	1	0	0	0	0	0	1	0	0	0	0	0	0	0	0	0	0	0	0	0	0	0	0	0	1	1	1	3	1	1	0	1	1	1	1	0	0	0	1	7.55	174	42	167
1640	1125865	1	1	48	0	0	0	0	0	0	0	0	0	0	0	0	0	0	0	0	1	0	0	1	0	0	1	0	0	1	1	1	1	3	1	0	0	1	0	0	0	0	0	1	1	3.42	104	29.5	340
1641	1130342	0	2	50	0	0	0	0	0	0	0	0	0	0	0	0	0	0	0	0	1	1	0	1	0	0	0	0	0	1	1	1	1	3	1	0	0	0	0	0	0	0	1	1	0	2.44	74	21.9	317
1642	1133943	0	1	28	0	0	0	0	0	0	0	0	1	1	0	0	0	0	0	0	1	0	0	1	0	1	0	0	0	0	1	1	4	3	2	1	0	0	0	0	1	0	0	0	1	2.74	83	23.2	206
1643	1134533	0	2	52	0	1	0	0	0	0	0	0	0	0	1	0	0	0	0	0	0	0	0	0	0	0	0	0	1	1	1	1	2	2	1	1	0	0	0	0	1	0	0	0	1	4.2	120	37.5	377
1644	1136574	0	1	74	1	0	0	0	0	0	0	0	0	0	0	0	0	0	0	0	0	0	0	0	0	1	0	0	0	1	0	0	4	2	1	1	0	0	0	0	0	0	0	0	0	5.79	171	51.5	235
1645	1134947	0	2	44	0	0	0	0	0	0	0	0	0	0	0	0	0	0	0	0	0	0	0	0	0	1	0	0	0	0	1	1	4	3	2	0	0	0	0	0	0	0	0	0	0	3.08	87	26.9	437
1646	1134504	0	2	19	0	0	0	0	0	0	0	0	0	0	0	0	0	0	0	0	0	0	0	0	0	0	0	0	1	1	1	0	1	3	2	0	0	0	0	0	0	0	0	0	0	4.56	141	46.5	192
1647	1138101	0	1	18	0	0	0	0	0	0	0	0	0	0	0	0	0	0	0	0	0	0	0	0	0	0	0	0	1	1	1	1	1	3	1	0	0	0	0	0	0	0	0	0	0	4.22	134	39.9	251
1648	872435	0	1	19	0	0	0	0	0	0	0	0	1	0	0	0	0	0	0	0	0	0	0	0	0	0	0	0	0	0	0	0	2	2	1	0	0	0	0	0	0	0	0	0	0	5.31	157	46.3	246
1649	1138915	0	1	50	0	0	1	0	0	0	0	0	0	0	0	0	0	0	0	0	0	0	0	0	0	0	0	0	1	0	1	1	1	1	1	1	0	0	0	0	0	0	0	0	0	3.47	107	33.2	313
1650	876762	0	2	51	0	0	0	0	0	0	0	0	0	0	0	0	0	0	0	0	0	0	0	0	0	0	0	0	0	1	0	0	4	3	1	0	0	0	0	0	0	0	0	0	0	3.93	115	34.8	66
1651	1137577	0	2	49	0	0	0	0	0	0	0	0	0	0	0	1	1	0	0	0	0	0	0	1	0	0	0	0	0	1	1	1	2	3	2	1	0	0	0	0	1	1	0	0	1	2.35	61	18.2	29
1652	1136108	0	2	50	0	1	0	0	0	0	1	0	0	0	1	0	0	0	0	0	0	0	0	0	0	0	0	0	0	0	1	1	2	2	1	0	0	0	0	0	0	0	1	0	0	2.39	64	20.1	501
1653	1138076	1	1	50	0	1	0	0	0	0	0	1	1	0	0	0	0	0	0	0	0	0	0	0	0	0	0	0	0	1	0	0	1	3	2	1	1	1	1	1	1	0	1	1	1	4.75	143	44.7	166
1654	1140165	0	1	27	0	0	0	0	0	0	0	0	0	0	0	0	0	0	0	0	0	0	0	0	0	0	0	0	0	0	0	0	4	2	1	0	0	0	0	0	0	0	0	0	0	5.27	156	44	403
1655	941627	0	1	61	0	1	1	0	1	1	0	0	0	0	0	0	0	0	0	0	0	0	0	0	0	0	0	0	0	0	1	1	1	3	1	1	1	1	0	0	0	1	0	0	1	3.89	91	27.8	48
1656		1	1	77	1	1	1	0	0	0	0	0	0	0	0	0	0	0	0	1	0	0	0	0	0	0	0	0	0	0	0	1	4	3	2	1	1	1	1	1	0	0	0	1	1	2.52	74	25.9	155
1657	1123750	0	1	72	1	0	0	0	0	0	0	0	0	0	0	0	0	0	0	0	1	1	0	1	0	0	0	0	0	0	0	1	3	3	1	1	0	0	0	0	0	0	0	1	1	3.33	95	27.6	83
1658	1121433	0	1	29	0	0	0	0	0	0	0	0	1	0	0	0	0	0	0	0	0	0	0	0	0	0	0	0	1	1	1	0	2	2	1	0	1	0	0	0	0	0	0	0	1	4.21	162	47	173
1659	1129460	0	1	66	1	0	0	0	0	0	0	0	1	0	0	0	0	0	0	0	0	0	0	0	0	0	0	0	1	0	1	0	1	2	1	0	1	0	0	0	0	0	0	0	1	3.54	111	32	375
1660	1130284	0	1	15	0	0	0	0	0	0	0	0	0	0	0	0	0	0	0	0	0	0	0	0	0	0	0	0	1	1	1	0	1	2	2	0	0	0	0	0	0	0	1	0	0	4.84	141	39.4	355
1661	1124154	0	1	62	0	1	1	0	0	0	0	0	0	0	0	0	0	0	0	0	0	0	0	0	0	0	0	0	1	1	1	1	2	3	1	0	1	0	0	0	0	0	0	0	1	3.37	100	29.7	148
1662	912958	0	1	68	1	1	1	0	0	0	0	1	0	0	0	0	0	0	0	0	1	1	0	1	0	1	0	0	0	1	1	0	3	3	1	1	1	1	1	0	0	0	1	1	1	3.7	110	31.22	216
1663	1133507	0	2	52	0	0	0	0	0	0	0	0	0	0	0	0	0	0	0	0	0	0	0	0	0	0	0	0	0	1	1	1	3	2	1	0	1	0	0	0	1	0	0	0	1	2.19	66	19.2	209
1664	1134229	0	2	42	0	0	1	1	0	0	1	0	0	0	0	0	0	0	0	0	0	0	0	0	0	0	0	1	0	1	1	1	1	2	1	1	0	0	0	0	0	0	0	0	0	2.93	81	22.4	169
1665	469979	0	2	75	1	1	1	0	0	1	0	0	0	0	0	0	0	0	0	0	0	0	0	0	0	0	0	0	0	1	1	0	1	1	1	0	1	0	1	0	0	0	0	0	1	3.71	108	33.2	236
1666	1141849	0	1	31	0	0	0	0	0	0	0	0	0	0	0	0	0	0	0	0	0	0	0	0	0	0	0	0	0	1	0	0	2	2	1	0	0	0	0	0	0	0	0	0	0	5.36	139	44	129
1667	1141892	0	1	16	0	0	0	0	0	0	0	0	0	0	0	0	0	0	0	0	0	0	0	0	0	0	0	0	1	1	1	0	1	2	1	0	0	0	0	0	0	0	0	0	0	5.01	147	42.6	324
1668	1142871	0	2	63	0	0	1	0	0	0	0	0	0	0	0	0	0	0	0	0	1	0	0	1	0	0	0	0	0	0	0	0	2	1	1	0	0	0	0	0	0	0	0	0	0	3.64	106	33.1	168
1669	1142620	0	2	62	0	0	1	1	0	0	0	0	0	0	0	0	0	0	0	0	1	0	0	1	0	0	0	0	0	0	0	1	3	3	1	0	0	0	0	0	0	0	0	0	0	2.99	87	26.1	244
1670	1140800	0	1	70	1	1	0	0	0	0	0	0	0	0	0	0	0	0	0	0	0	0	0	0	0	0	0	0	1	0	1	1	2	3	1	1	0	0	1	0	0	0	1	0	1	3.02	91	26.1	207
1671	1142013	1	2	26	0	0	0	0	0	0	0	0	1	0	0	0	0	0	0	0	0	0	0	0	0	0	1	0	0	1	1	0	1	3	1	0	1	1	1	1	1	0	0	1	1	4.58	116	32.9	115
1672	1144598	0	1	22	0	0	0	0	0	0	0	0	0	0	0	0	0	0	0	0	0	0	0	0	0	0	0	0	1	0	1	0	1	1	1	0	0	0	0	0	0	0	0	0	0	3.61	107	30.9	247
1673	1135050	1	2	67	1	1	0	0	0	0	1	0	0	0	0	0	0	0	0	0	0	0	0	0	0	1	0	0	0	1	1	1	4	3	1	0	1	0	1	1	1	0	0	0	1	2.53	79	23.9	99
1674	1145542	0	1	38	0	0	0	0	0	0	0	0	1	0	0	0	0	0	0	0	0	0	0	0	0	0	0	0	0	1	0	0	2	3	1	0	0	0	0	0	0	0	0	0	0	6	136	42.4	340
1675	1147422	0	1	46	0	0	0	0	0	0	0	0	0	0	0	0	0	0	0	0	0	0	0	0	0	0	0	0	0	1	0	0	4	3	1	0	0	0	0	0	0	0	0	0	0	4.64	146	39.8	330
1676	1148950	0	1	16	0	0	0	0	0	0	0	0	0	0	0	0	0	0	0	0	0	0	0	0	0	0	0	0	1	1	1	0	1	1	2	0	1	0	0	0	0	0	0	0	1	4.45	156	45.7	204
1677	1149712	0	1	83	1	0	0	0	0	0	0	0	1	1	0	0	0	0	0	0	0	0	0	0	0	1	0	0	0	1	1	0	1	3	2	1	0	1	0	0	0	0	0	0	1	3.54	109	33.5	265
1678	1149524	0	1	33	0	0	0	0	0	0	0	0	0	0	0	0	0	0	0	0	0	0	0	0	0	0	0	0	1	0	1	0	1	1	1	0	0	0	0	0	0	0	0	0	0	3.51	115	33.8	166
1679	1147310	0	1	23	0	0	1	0	0	0	0	0	0	0	0	0	0	0	0	0	0	0	0	0	0	0	0	0	0	1	0	0	1	1	1	1	0	0	0	0	0	0	0	0	0	4.73	164	48.1	262
1680	1143233	0	1	35	0	0	1	1	0	0	0	0	0	0	0	0	0	0	0	0	0	0	0	0	0	0	0	0	1	0	1	0	1	3	2	0	0	0	0	0	0	0	0	0	0	4.87	143	40.8	309
1681	1147517	0	1	18	0	0	0	0	0	0	0	0	0	0	0	0	0	0	0	0	0	0	0	0	0	0	0	0	1	1	1	0	1	2	2	0	0	0	0	0	0	0	0	0	0	4.06	127	35.5	275
1682	1145016	0	1	48	0	0	0	0	0	0	0	0	0	0	0	0	0	0	0	0	1	0	0	1	0	0	0	0	0	1	0	0	2	3	1	1	0	0	0	0	0	0	0	0	1	2.7	91	25.9	76
1683	1150919	0	2	18	0	0	0	0	0	0	0	0	0	0	0	0	0	0	0	0	0	0	0	0	0	0	0	0	1	1	1	0	1	3	1	0	0	0	0	0	1	0	0	0	1	5.92	170	48.4	393
1684	1147709	0	1	35	0	0	0	0	0	0	0	0	1	1	0	0	0	0	0	0	0	0	0	0	0	0	0	0	0	1	1	0	4	3	2	1	0	1	1	1	1	0	0	1	1	2.69	108	30.2	146
1685	1144573	0	1	52	0	0	0	0	0	0	0	0	0	0	0	0	0	0	0	0	0	0	0	0	1	1	0	0	0	1	0	0	1	2	2	0	1	0	0	1	1	0	0	0	1	3.62	105	44.6	370
1686	1148654	0	2	42	0	0	0	0	0	0	0	0	0	0	0	0	0	0	0	0	0	0	0	0	0	0	0	0	1	1	1	0	1	3	1	0	0	0	0	0	0	0	0	0	0	4.91	141	40.3	322
1687	1149098	0	2	84	1	0	0	0	0	0	0	1	0	0	0	0	0	0	0	0	0	0	0	0	0	0	0	0	0	1	0	1	4	1	1	0	0	0	0	0	0	0	0	0	0	1.53	47	40.4	122
1688	1007479	0	2	40	0	0	0	0	0	0	0	0	1	0	0	0	0	0	0	0	0	0	0	0	0	0	0	0	0	0	0	1	4	2	1	0	0	0	0	0	1	0	0	0	1	3.27	94	27.5	208
1689	1149455	0	1	45	0	1	0	0	0	0	0	0	0	0	0	0	0	0	0	0	0	0	0	0	0	0	0	0	0	1	0	0	2	3	2	1	0	0	0	0	0	0	0	0	0	4.16	122	36.5	360
1690	1151181	0	1	61	0	1	1	0	0	0	0	0	0	0	0	0	0	0	0	0	0	0	0	0	0	0	0	0	0	1	0	0	4	3	1	1	0	0	0	0	0	0	0	0	0	5.14	148	41	236
1691	1151114	0	2	61	0	1	1	0	0	1	1	0	0	0	0	0	0	0	0	0	0	0	0	0	0	0	0	0	0	0	0	1	4	3	1	0	1	0	0	0	0	0	0	0	1	4.27	116	35.2	167
1692	1153156	0	2	38	0	0	0	0	0	0	0	0	0	0	0	0	0	0	0	0	0	0	0	0	0	0	0	0	0	1	0	0	2	3	1	0	0	0	0	0	0	0	0	0	0	3.72	105	30.7	304
1693	634079	0	2	26	0	0	0	0	0	0	0	0	0	0	0	0	0	0	0	0	0	0	0	0	0	0	0	0	1	1	1	0	1	1	1	0	0	0	0	0	0	0	0	0	0	4.21	116	35.3	207
1694	1147102	0	1	20	0	0	0	0	0	0	0	0	0	0	0	0	0	0	0	0	0	0	0	0	0	0	0	0	1	0	1	0	1	2	2	0	0	0	0	0	0	0	0	0	0	5.04	156	44.7	252
1695	1147953	0	1	45	0	0	0	0	0	0	0	0	1	0	0	0	0	0	0	0	0	0	0	0	0	0	0	0	0	1	1	0	4	3	1	1	0	1	0	0	1	1	0	0	1	3.7	109	30.8	42
1696	1151737	0	2	18	0	0	0	0	0	0	0	0	0	0	0	0	0	0	0	0	0	0	0	0	0	0	0	0	0	0	0	0	2	3	1	1	0	0	0	0	0	0	0	0	0	3.88	115	32.5	191
1697	1154796	0	1	53	0	0	1	0	0	0	0	0	1	0	0	0	0	0	0	0	0	0	0	0	0	0	0	0	0	1	1	0	1	3	1	1	0	1	0	0	0	1	0	0	1	3.11	114	31.4	45
1698	1153954	0	2	15	0	0	0	0	0	0	0	0	0	0	1	0	0	0	0	0	0	0	0	0	0	0	0	0	1	1	1	1	2	3	1	1	0	0	0	0	0	0	0	0	0	2.47	59	19.9	279
1699	1153558	1	1	21	0	0	0	0	0	0	0	0	0	0	0	0	0	0	0	0	0	0	0	0	0	0	0	0	0	1	0	0	2	3	1	1	0	1	1	1	0	0	0	1	1	4.85	142	38.7	219
1700	1151389	0	1	50	0	1	1	0	0	0	0	0	0	0	0	0	0	0	0	0	0	0	0	0	0	0	0	0	1	1	1	0	1	2	1	0	0	0	0	0	0	0	0	0	0	5.58	170	47.4	333
1701		1	1	66	1	1	0	0	1	1	0	0	0	0	0	0	0	0	0	0	0	0	0	0	0	0	1	0	0	1	1	1	2	3	2	1	1	1	1	1	0	0	0	1	1	3.22	102	29.7	181
1702	1151659	0	2	52	0	0	0	0	0	0	1	0	1	0	1	0	0	0	0	0	0	0	0	0	0	0	0	0	1	1	0	1	2	3	1	1	0	0	0	0	0	0	0	0	0	2.89	61	19.6	113
1703	1149105	0	2	35	0	1	0	0	0	0	0	0	0	0	1	0	0	0	0	0	0	0	0	0	0	0	0	0	1	1	1	1	2	3	2	0	0	0	0	0	0	0	0	0	0	2.85	82	23.4	83
1704	1151231	0	1	27	0	1	0	0	0	0	0	0	1	0	0	0	0	0	0	0	0	0	0	0	0	0	0	0	1	0	1	0	4	3	1	0	0	0	0	0	0	0	0	0	0	4.3	119	36.1	373
1705	1152978	1	1	77	1	0	1	0	0	0	1	0	1	0	0	0	0	0	0	0	0	0	0	0	0	0	0	0	0	1	0	0	1	3	1	1	0	0	1	1	1	0	0	0	1	4.78	147	43.5	102
1706	1156877	0	1	58	0	0	0	0	0	0	1	1	0	0	0	0	0	0	0	0	0	0	0	0	0	0	0	0	1	1	1	0	1	2	2	0	0	0	0	0	0	0	0	0	0	3.53	96	28.7	400
1707	1145760	0	2	68	1	0	0	0	0	0	0	0	0	0	0	0	0	0	0	0	1	0	0	1	0	0	1	0	1	0	1	1	1	3	1	1	0	1	0	0	1	0	1	0	1	5.47	151	45.3	167
1708	1135014	0	1	58	0	1	1	0	0	1	0	0	1	0	0	0	0	0	0	0	0	0	0	0	0	0	0	0	0	0	1	0	1	2	1	1	1	1	0	0	0	0	0	0	0	4.75	133	39.4	129
1709	1157995	0	1	71	1	1	0	0	0	0	0	0	0	0	0	0	0	0	0	1	0	0	0	0	0	0	0	0	0	0	1	1	2	1	2	0	0	0	1	1	0	0	0	0	1	3.67	100	30.8	134
1710	1027559	0	2	36	0	1	1	0	0	0	0	0	0	0	0	0	0	0	0	0	0	0	0	0	0	0	0	0	1	0	1	1	2	1	2	0	0	0	0	0	0	0	0	0	0	3.08	81	25.3	191
1711	1160066	0	1	74	1	1	0	0	0	0	0	0	0	0	0	0	0	0	0	0	0	0	0	0	0	0	0	0	1	0	0	0	2	2	1	0	0	0	0	0	0	0	0	0	0	3.48	111	33.3	216
1712	1161628	0	1	78	1	0	0	0	0	0	0	0	1	0	0	0	0	0	0	0	0	0	0	0	0	0	0	0	0	1	0	1	1	3	1	1	0	0	0	0	0	0	0	0	0	2.9	97	27.9	230
1713	1163052	0	1	17	0	0	0	0	0	0	0	0	0	0	0	0	0	0	0	0	0	0	0	0	0	0	0	0	0	0	0	0	2	3	1	0	0	0	0	0	0	0	0	0	0	5	143	41.1	199
1714	1160378	0	2	66	1	1	1	0	0	1	0	1	0	0	0	0	0	0	0	0	0	0	0	0	0	0	0	0	0	1	1	1	4	2	2	0	1	0	0	0	0	0	0	0	1	2.6	72	21.8	219
1715	1159196	0	1	41	0	0	1	0	0	0	0	0	0	0	0	0	0	0	0	0	0	0	0	0	0	0	0	0	0	1	0	1	4	3	1	0	0	0	0	0	0	0	0	0	0	2.94	83	26.6	95
1716	1158467	0	2	77	1	0	0	0	0	0	0	0	0	0	0	0	0	0	0	0	0	0	0	0	0	0	0	0	0	0	1	1	3	3	1	1	0	0	0	0	0	0	0	0	0	2.96	87	25.9	245
1717	1162874	0	1	61	0	0	0	0	0	0	0	0	0	0	0	0	0	0	0	0	1	0	0	1	0	0	0	0	0	1	1	1	3	3	1	0	0	0	0	0	0	0	0	0	0	3.18	94	28.1	453
1718	774584	0	1	38	0	0	1	0	0	0	0	0	1	0	0	0	0	0	0	0	0	0	0	0	0	0	0	0	0	1	1	0	1	2	1	1	0	0	0	0	0	0	0	0	0	6.56	182	53.5	209
1719	1166052	0	1	76	1	0	0	0	0	1	0	0	0	0	0	0	0	0	0	0	0	0	0	0	0	0	0	0	0	0	1	1	1	3	1	0	1	0	0	0	0	0	0	0	1	2.45	71	21.5	131
1720	1162355	0	1	22	0	0	0	0	0	0	0	0	0	0	0	0	0	0	0	0	0	0	0	0	0	0	0	0	1	0	1	0	1	3	1	0	0	0	0	0	0	0	0	0	0	4.5	123	34.5	486
1721	1160971	0	1	79	1	0	1	1	0	0	0	1	0	0	0	0	0	0	0	1	0	0	0	0	0	0	0	0	0	1	0	0	2	1	1	1	1	0	1	0	0	0	0	0	0	4.31	142	39.5	100
1722	1165725	0	2	50	0	1	1	1	0	0	1	0	0	0	0	0	0	0	0	0	0	0	0	0	0	0	0	0	0	0	1	1	2	2	1	1	0	0	1	0	0	0	0	0	1	3.65	104	29.2	885
1723	1166483	0	1	83	1	1	1	0	0	0	0	0	0	0	0	0	0	0	0	0	0	0	0	0	0	0	0	0	0	1	1	1	3	1	1	0	0	0	0	0	0	0	0	0	0	3.4	101	29.4	139
1724	1151089	0	1	77	1	0	1	0	0	1	0	0	0	0	0	0	0	0	0	1	0	0	0	0	0	0	0	0	0	1	0	0	1	2	1	0	1	0	0	0	0	0	0	0	1	4.4	128	37.8	185
1725	1087495	0	2	65	1	1	1	0	0	0	0	0	0	0	0	0	0	0	0	0	0	0	0	0	0	0	0	0	0	1	0	1	2	2	1	0	0	0	0	0	0	0	0	0	0	3.65	105	30.9	189
1726	1163359	0	2	62	0	0	0	0	0	0	0	0	0	0	0	0	0	0	0	0	0	0	0	0	0	0	0	0	1	1	1	0	1	3	1	0	0	0	0	0	0	0	0	0	0	4.06	123	35.2	157
1727	993420	0	2	88	1	0	0	0	0	1	0	1	0	0	0	0	0	1	0	0	0	0	0	0	0	0	0	0	0	1	1	1	1	2	2	1	1	0	0	0	0	0	0	0	0	3.75	106	34.9	157
1728	1167359	0	1	50	0	0	0	0	0	0	0	0	0	0	0	0	0	0	0	0	0	0	0	0	0	0	0	0	0	1	0	0	4	3	1	1	0	0	0	0	0	0	0	0	0	3.59	108	29.6	202
1729	1168542	0	2	23	0	0	0	0	0	0	0	0	0	0	0	0	0	0	0	0	0	0	0	0	0	0	0	0	0	1	1	0	1	2	1	0	0	0	0	0	0	0	0	0	0	3.63	109	31.4	240
1730	1162389	0	1	51	0	1	1	0	0	0	0	0	0	0	0	0	0	0	0	0	0	0	0	0	0	0	0	0	0	0	0	0	4	2	1	0	0	0	0	0	1	0	0	0	0	3.6	115	32.7	202
1731	1168567	0	1	28	0	0	0	0	0	0	0	0	0	0	0	0	0	0	0	0	0	0	0	0	0	0	0	0	0	1	0	0	2	3	1	0	0	0	0	0	0	0	0	0	0	4.86	145	40	193
1732	1169573	0	2	70	1	0	0	0	0	0	0	0	0	0	0	0	0	0	0	0	0	0	0	0	0	0	0	0	0	1	0	1	2	3	1	0	0	0	0	0	0	0	0	0	0	4.93	100	29.7	134
1733	1167576	0	2	45	0	1	0	0	0	0	1	0	0	0	1	0	0	0	0	0	0	0	0	0	0	0	0	0	0	1	1	1	2	3	1	1	0	0	0	0	0	0	0	0	0	3.37	102	30	348
1734	1076683	0	1	18	0	0	0	0	0	0	1	0	1	0	0	0	0	0	0	0	0	0	0	0	0	0	0	0	1	1	1	0	1	2	1	0	0	1	0	0	1	0	0	0	1	7.22	213	58	279
1735	1133896	0	2	69	1	1	0	0	0	1	0	1	0	0	0	0	0	0	0	0	0	0	0	0	0	0	0	0	1	0	1	0	2	3	1	1	1	0	0	0	0	0	0	0	0	2.73	74	21.6	111
1736	1175872	0	2	68	1	0	0	0	0	1	0	0	1	0	0	0	0	0	0	0	0	0	0	0	0	0	0	0	0	1	0	0	2	3	1	0	1	0	0	0	1	0	0	0	1	4	103	29.6	176
1737	1177606	0	1	58	0	1	0	0	0	0	0	0	1	0	0	0	0	0	0	0	0	0	0	0	0	0	0	0	0	1	0	0	1	3	1	1	0	1	0	0	1	0	0	1	1	3.62	107	31.4	96
1738	1175371	0	1	72	1	1	0	0	0	0	0	0	0	0	1	0	0	0	0	0	0	0	0	0	0	0	0	0	0	1	1	1	2	3	2	0	0	0	0	0	0	0	0	0	0	2.98	86	26.8	133
1739	1169790	0	1	35	0	0	0	0	0	0	0	0	1	0	0	0	0	0	0	0	0	0	0	0	0	0	0	0	0	0	1	1	2	3	1	0	0	0	0	0	1	0	0	0	1	2.72	80	22.2	143
1740	879136	0	1	51	0	0	0	0	0	0	0	0	1	0	0	1	0	0	0	0	0	0	0	1	0	0	0	0	0	1	1	1	2	3	1	1	0	0	0	0	0	1	0	0	1	1.79	66	19.2	23
1741	1169666	0	1	59	0	0	1	0	0	0	0	0	0	0	0	0	0	0	0	0	1	0	0	1	0	1	0	0	0	0	0	1	2	3	2	0	0	1	0	0	1	0	1	0	1	3.54	103	29.3	336
1742	1173261	0	1	50	0	1	1	0	0	0	0	1	1	0	0	0	0	0	0	0	0	0	1	0	0	0	0	0	0	1	0	0	4	3	1	1	0	0	0	0	0	0	0	0	0	4.69	150	39.5	329
1743	1176264	0	1	73	1	1	1	0	0	0	0	0	0	0	0	0	0	0	0	0	1	0	0	1	0	1	0	0	0	0	0	1	3	3	1	1	0	0	0	0	0	0	0	0	0	3.16	61	19.1	139
1744	1150654	1	2	63	0	1	0	0	0	0	1	0	0	0	0	0	0	0	0	0	1	0	0	1	0	0	0	0	1	1	1	0	1	3	1	1	0	0	1	1	0	0	0	1	1	4.89	143	14.25	137
1745	1173534	0	1	28	0	0	0	0	0	0	0	0	0	0	0	0	0	0	0	0	0	0	0	0	0	0	0	0	0	0	0	0	2	3	1	0	0	0	0	0	0	0	0	0	0	4.21	125	32.2	152
1746		0	2	80	1	1	1	1	0	1	1	1	0	0	0	0	0	1	0	0	0	0	0	0	0	0	0	0	0	1	0	1	4	2	1	0	1	0	0	0	0	0	0	0	0	4.19	121	33.8	336
1747	1170391	0	2	68	1	0	0	0	0	0	0	0	1	1	0	0	0	0	0	0	0	0	0	0	0	0	0	0	1	0	1	1	1	3	1	0	0	0	0	0	0	0	0	0	0	2.67	81	23.5	97
1748	1177260	0	2	68	1	0	1	0	0	1	0	0	0	0	0	0	0	0	0	1	0	0	0	0	0	0	0	0	0	1	0	0	4	2	1	1	1	1	1	1	1	0	0	0	1	5.2	162	50.6	92
1749	1168763	0	2	49	0	0	0	0	0	0	0	0	0	0	0	1	0	0	0	0	0	0	0	1	0	0	0	0	0	1	0	1	2	3	2	1	1	1	0	0	0	1	0	0	1	1.78	51	19.8	16
1750	1170278	1	1	34	0	0	0	0	0	0	0	0	0	0	0	0	0	0	0	0	0	0	0	0	0	1	0	0	0	1	1	1	2	3	1	0	0	0	0	0	0	0	0	0	1	3.58	101	29.6	340
1751	1175942	0	1	19	0	0	0	0	0	0	0	0	0	0	0	0	0	0	0	0	0	0	0	0	0	0	0	0	1	1	1	1	1	3	1	0	0	0	0	0	0	0	0	0	0	3.61	102	28.6	100
1752	1177157	0	1	70	1	1	0	0	1	1	0	1	1	0	0	0	0	0	0	0	0	0	0	0	0	0	0	0	0	0	1	1	1	3	2	0	1	1	1	1	1	0	0	1	1	3.48	127	37.7	512
1753	1177335	0	1	76	1	0	0	0	0	0	0	0	1	0	0	0	0	0	0	0	1	0	0	1	0	0	0	0	0	0	1	1	2	3	2	1	0	0	0	0	1	0	0	0	1	2.5	69	17.7	181
1754	1179422	0	2	26	0	0	0	0	0	0	0	0	0	0	0	0	0	0	0	0	0	0	0	0	0	0	0	0	0	0	0	1	2	3	1	0	0	0	0	0	0	0	0	0	0	3.7	102	29.3	357
1755	1180736	0	1	52	0	0	0	0	0	0	0	0	1	0	0	0	1	0	0	0	0	0	0	1	0	0	0	0	0	1	1	0	4	3	1	1	0	0	0	0	1	0	0	0	1	5.31	124	35.6	118
1756	1181785	0	1	26	0	0	0	0	0	0	0	0	0	0	0	0	0	0	0	0	0	0	0	0	0	0	0	0	1	1	1	0	1	3	1	1	0	0	0	0	0	0	0	0	0	4.25	124	38.1	252
1757	1177924	0	1	15	0	0	0	0	0	0	0	0	0	0	0	0	0	0	0	0	0	0	0	0	0	0	0	0	0	1	1	0	2	3	1	1	0	0	0	0	0	0	0	0	0	4.04	122	35.5	280
1758	1155772	0	2	51	0	0	1	0	0	0	0	0	1	0	0	0	0	0	0	0	0	0	0	0	0	0	0	0	0	0	1	1	2	3	2	1	1	1	1	1	1	0	1	1	1	2.47	75	23.4	123
1759	1181306	0	1	62	0	1	0	0	0	0	0	0	1	0	0	0	0	0	0	0	0	0	1	0	0	0	0	0	0	1	0	0	4	3	1	0	0	0	0	0	0	0	0	0	0	4	125	38.4	81
1760	1178181	0	2	55	0	1	1	0	0	0	0	0	0	0	0	0	0	0	0	0	0	0	0	0	0	0	0	0	0	1	0	1	3	3	1	1	0	0	0	0	0	0	0	0	0	2.54	74	21.5	133
1761	1180730	0	1	42	0	0	0	0	0	0	0	0	1	0	0	0	0	0	0	0	0	0	0	0	0	0	0	0	0	0	1	1	2	3	1	0	0	0	0	0	1	0	0	0	1	2.28	86	23.9	147
1762	1183057	1	1	61	0	1	0	0	0	0	0	1	0	0	0	0	0	0	0	0	0	0	0	0	0	0	0	0	0	1	1	0	4	3	2	1	0	1	1	1	0	0	0	1	1	3.11	122	37	137
1763	1000277	0	2	66	1	1	1	0	0	1	0	1	0	0	0	0	0	0	0	0	0	0	0	0	0	0	1	0	1	0	0	1	2	3	1	0	1	1	1	1	1	0	0	1	1	3.47	112	35.6	83
1764	1178198	0	2	64	0	0	1	0	0	0	0	0	1	0	0	0	0	0	0	0	0	0	0	0	0	0	0	0	0	1	1	1	1	3	1	1	0	0	1	0	1	0	0	0	1	2.5	70	20.5	224
1765	1182584	0	1	64	0	1	0	0	0	0	0	1	1	0	0	0	0	0	0	0	0	0	0	0	0	0	0	0	0	0	0	0	2	2	1	0	0	0	1	0	0	0	0	0	0	5	152	44.1	119
1766	1182581	0	1	71	1	1	1	0	0	0	0	0	0	0	0	0	0	0	0	0	0	0	0	0	0	1	0	0	0	1	0	1	3	3	1	0	0	0	0	0	0	0	0	0	0	3.49	108	32	174
1767	1183703	0	1	62	0	0	0	0	0	1	0	0	0	0	0	0	0	0	0	0	0	0	0	0	0	0	0	0	0	1	1	0	1	1	1	0	1	0	0	0	0	0	0	0	0	3.98	109	34.3	511
1768	1178176	0	1	78	1	1	0	0	0	1	0	0	0	0	0	0	0	0	0	0	1	0	0	1	0	0	0	0	0	0	1	1	2	3	1	0	1	0	0	0	0	0	0	0	0	2.5	78	23.8	161
1769	1183653	0	1	58	0	0	0	0	0	1	0	0	1	0	0	0	0	0	0	0	0	0	0	0	0	0	0	0	0	1	0	0	1	2	1	1	1	1	0	1	1	0	0	1	1	4.74	150	46.1	175
1770	1181315	0	1	16	0	0	0	0	0	0	0	0	0	0	0	0	0	0	0	0	0	0	0	0	0	0	0	0	1	1	1	0	1	2	1	0	0	0	0	0	0	0	0	0	0	5	142	38.4	337
1771	1182944	0	1	60	0	1	1	0	0	1	0	0	0	0	0	0	0	0	0	0	0	0	0	0	0	0	0	0	0	1	1	1	1	3	1	1	1	1	1	1	0	0	1	0	1	3	73	25.5	196
1772	1159217	0	1	57	0	0	0	0	0	0	0	0	0	0	0	0	0	0	0	0	1	0	0	1	0	0	1	0	0	1	1	1	1	3	1	1	0	1	0	0	0	0	0	0	0	2.89	89	25.3	187
1773	1183100	0	2	72	1	1	1	0	0	1	0	0	0	0	0	0	0	0	0	0	0	0	0	0	0	0	0	0	1	0	1	1	1	2	1	0	1	0	0	0	0	0	1	0	0	3.38	102	29.2	181
1774	1187601	0	1	55	0	1	1	0	0	0	0	0	1	0	0	0	0	0	0	0	0	0	0	0	0	0	0	0	0	1	0	0	4	3	1	0	0	0	0	0	0	0	0	0	0	4.64	142	41.4	252
1775	1186628	0	1	74	1	1	0	0	0	1	0	0	0	0	0	0	0	0	0	0	1	0	0	1	0	0	0	0	1	1	0	1	2	2	1	0	1	0	0	0	0	0	0	0	0	2.5	83	26.4	164
1776	850273	0	2	47	0	0	0	0	0	0	0	0	0	0	0	0	0	0	0	0	1	0	0	1	0	0	0	0	0	1	0	0	3	3	1	1	0	0	0	0	0	0	0	0	0	3.84	103	29.6	340
1777	1182620	0	2	68	1	0	0	0	0	0	1	1	0	0	1	0	0	0	0	0	0	0	0	0	0	0	0	0	0	1	1	1	2	3	1	1	0	0	0	0	0	0	1	0	0	2.27	42	12.8	272
1778	1185457	0	1	85	1	0	0	0	0	1	0	0	0	0	0	0	0	0	0	1	0	0	0	0	0	0	0	0	0	0	0	1	1	2	1	0	1	1	0	0	0	0	0	0	1	3	105	32.1	70
1779	1186488	0	2	58	0	0	0	0	0	0	1	0	1	0	1	0	0	0	0	1	0	0	0	0	0	0	0	0	0	1	1	1	2	3	1	0	0	0	0	0	0	0	0	0	0	2.81	77	23.7	173
1780	1187634	1	1	77	1	1	0	0	0	1	0	0	0	0	0	0	0	0	0	1	0	0	0	0	0	0	0	0	0	1	1	1	2	2	1	1	1	1	1	1	0	0	1	1	1	3.39	94	27.5	322
1781	1176472	0	2	28	0	1	0	0	0	1	0	0	0	0	1	0	0	0	0	0	0	0	0	0	0	1	0	0	1	0	1	1	2	3	1	0	1	0	0	0	0	0	0	0	1	2.46	73	20.7	122
1782	1192896	0	1	25	0	0	0	0	0	0	0	0	0	0	0	0	0	0	0	0	0	0	0	0	0	0	0	0	0	0	1	0	2	3	1	0	0	0	0	0	0	0	0	0	0	3.7	107	30.9	289
1783	1192885	0	2	66	1	0	0	0	0	0	0	0	0	0	0	0	0	0	0	0	0	0	0	0	0	0	0	0	0	0	1	0	2	3	1	0	0	0	0	0	0	0	0	0	0	3.39	104	27.2	91
1784	1116764	0	1	70	1	1	0	0	0	0	0	0	0	0	0	0	0	0	0	0	0	0	0	0	0	0	0	0	1	1	0	0	2	3	1	1	0	0	0	0	0	0	0	0	0	4.16	125	35.9	302
1785	1120620	0	1	27	0	1	0	0	0	0	0	0	0	0	0	0	0	0	0	0	0	0	0	0	0	0	0	0	0	1	0	0	2	3	1	0	0	0	0	0	0	0	0	0	0	4.07	121	36.9	156
1786	956504	0	1	69	1	1	1	1	1	0	0	0	0	0	0	0	0	0	0	0	0	0	0	0	0	0	0	0	0	1	0	0	1	3	2	1	0	0	0	0	0	0	0	0	0	3.7	150	43	233
1787	1119396	0	1	75	1	1	0	0	1	1	0	0	0	0	0	0	0	0	0	0	0	0	0	0	0	0	0	0	0	1	0	0	1	3	1	1	1	0	0	0	0	0	0	0	1	4.31	133	39.1	235
1788	1134453	0	2	49	0	0	0	0	0	0	0	0	0	0	0	0	0	0	0	0	0	0	0	0	0	0	0	0	0	1	1	0	2	3	2	0	0	0	0	0	0	0	0	0	0	4.05	106	33	235
1789	1131603	1	1	52	0	0	0	0	0	0	0	0	1	0	0	0	0	0	0	0	0	0	0	0	0	0	0	0	0	1	1	0	1	3	1	1	1	0	1	1	1	0	0	0	1	5.68	191	52.6	114
1790	1140434	0	1	45	0	0	0	0	0	0	0	0	1	0	0	0	0	0	0	0	0	0	0	0	0	0	0	0	1	1	1	0	1	3	1	1	0	0	0	0	1	1	0	0	0	5	127	35	21
1791	1137698	0	1	57	0	0	1	0	0	0	0	0	1	0	0	0	0	0	0	0	0	0	0	0	0	0	1	0	0	0	1	1	1	3	2	1	0	0	0	0	0	0	0	0	0	2.5	69	24.5	152
1792	1009665	0	1	51	0	0	0	0	0	0	0	0	1	0	0	0	0	0	0	0	1	0	0	1	0	0	0	0	0	0	0	0	3	3	1	1	0	0	0	0	0	0	0	0	0	3.28	94	27	139
1793	1145685	1	1	67	1	0	0	0	0	0	1	0	0	0	0	0	0	0	0	0	0	0	0	0	0	0	0	0	0	0	1	1	1	2	2	1	0	0	0	0	0	1	1	0	1	2.26	67	22.6	42
1794	1144848	1	1	61	0	0	0	0	0	0	0	0	0	0	0	0	0	0	0	0	0	0	0	0	0	0	1	0	1	0	0	0	1	3	1	1	0	0	0	1	0	1	0	0	1	4.2	132	36.6	20
1795	1148404	1	1	73	1	1	0	0	0	1	0	0	0	0	0	0	0	0	0	1	0	0	0	0	0	0	0	0	0	1	0	0	1	3	1	1	1	1	0	0	0	0	0	0	1	4.97	136	40.3	210
1796	1147643	1	1	26	0	0	0	0	0	0	0	0	0	0	0	0	0	0	0	0	0	0	0	0	0	0	0	0	1	0	0	0	2	3	1	0	0	0	0	0	0	0	0	0	0	4	118	36.6	184
1797	1149798	0	1	40	0	0	0	0	0	0	0	0	1	0	0	0	0	0	0	0	0	0	0	0	0	0	0	0	0	0	0	0	2	3	1	1	0	0	0	0	0	0	0	0	0	4	125	35.9	117
1798	1049851	1	2	78	1	0	0	0	0	1	1	1	0	0	0	0	0	0	0	0	0	0	0	0	0	0	0	0	0	0	0	0	1	3	2	1	1	1	1	1	0	0	1	1	1	3.25	99	32	154
1799	1147428	0	1	24	0	0	0	0	0	0	0	0	0	0	0	0	0	0	0	0	0	0	0	0	0	0	0	0	0	0	0	0	1	3	1	1	0	0	0	0	0	0	0	0	0	4.15	128	35.1	325
1800	1151428	0	1	80	1	0	0	0	0	0	0	1	1	0	0	0	0	0	0	1	0	0	0	0	0	0	0	0	0	1	0	0	1	3	2	1	1	1	1	1	1	0	0	1	1	4.24	142	43.2	98
1801	1155393	0	2	61	0	0	0	0	0	0	0	0	0	0	0	0	0	0	0	0	0	0	0	0	0	0	0	0	0	1	0	0	3	3	1	1	0	0	0	0	0	0	0	0	0	3.63	108	30.3	176
1802	1152918	0	1	67	1	1	0	0	0	0	0	1	0	0	0	0	0	0	0	1	0	0	0	0	0	0	0	0	0	1	0	0	3	3	1	0	0	0	0	0	0	0	0	0	0	4.7	99	30.1	194
1803	1154097	0	1	62	0	1	0	0	0	0	0	0	0	0	0	0	0	0	0	0	0	0	0	0	0	0	0	0	0	1	0	1	4	3	1	1	0	0	0	0	0	0	0	0	0	2.8	75	22.8	373
1804	1127057	0	2	21	0	0	0	0	0	0	0	0	0	0	1	0	0	0	0	0	0	0	0	0	0	0	0	0	1	1	1	1	2	3	2	0	1	0	0	0	0	0	0	0	1	2.41	89	26	166
1805	1157124	0	1	74	1	0	0	0	0	0	0	0	0	0	0	0	0	0	0	0	1	0	0	1	0	0	0	0	1	1	0	0	3	3	1	0	0	0	0	0	0	0	0	0	0	4	126	36.3	91
1806	906797	0	1	44	0	0	1	1	0	0	0	0	1	1	0	0	0	0	0	0	0	0	0	0	0	0	0	0	0	0	0	1	1	3	2	1	0	0	0	0	1	1	0	0	1	2.71	88	28.3	48
1807	1161774	1	2	53	0	0	0	0	0	0	0	1	0	0	0	0	0	0	0	0	0	0	0	0	0	0	0	0	1	1	1	0	1	3	2	1	1	1	1	1	1	0	0	1	1	2.84	84	26.3	67
1808	1159500	0	1	59	0	0	0	0	0	0	0	0	1	1	0	0	0	0	0	1	0	0	0	0	0	0	0	0	1	1	1	0	4	1	2	1	0	0	0	0	0	1	0	0	0	3.23	110	32.3	57
1809	1041993	0	2	70	1	0	0	0	0	0	0	0	1	0	0	0	0	0	0	0	1	0	1	1	0	0	0	0	0	1	1	1	2	3	1	1	0	0	0	0	0	0	0	0	0	1.93	61	18.6	171
1810	1163777	0	2	58	0	0	0	0	0	0	0	0	0	0	0	0	0	0	0	0	0	0	0	0	0	0	0	0	0	1	0	0	2	3	1	0	0	0	0	0	0	0	0	0	0	3.43	99	25.9	188
1811	1160559	0	2	46	0	1	0	0	0	0	0	0	1	0	0	0	0	0	0	0	1	0	0	1	0	0	0	0	0	1	0	0	2	3	1	1	0	0	0	0	0	0	0	0	0	3.25	95	27.8	239
1812	1163390	0	2	59	0	0	0	0	0	0	0	0	0	0	0	0	0	0	0	0	0	0	0	0	0	0	0	0	0	0	0	0	2	3	2	1	0	0	0	0	0	0	0	0	0	3.88	114	32.1	184
1813	1164189	0	2	85	1	1	0	0	0	1	0	0	0	0	1	0	0	0	0	0	0	0	0	0	0	0	0	0	0	1	0	1	2	3	2	1	1	0	1	1	0	1	0	1	1	1.86	58	16.2	31
1814	1167881	0	2	45	0	0	0	0	0	1	0	0	0	0	0	0	0	0	0	0	0	0	0	0	1	1	0	0	0	1	0	0	1	3	2	1	1	0	0	1	0	0	0	0	1	2.81	88	24.3	315
1815	1171022	0	1	52	0	0	0	0	0	0	0	0	1	0	0	0	0	0	0	0	0	0	1	0	0	0	0	0	0	1	0	0	2	3	1	1	0	0	0	0	0	0	0	0	0	4.44	130	36.5	179
1816	1169531	0	1	40	0	0	0	0	1	0	0	0	0	0	0	0	0	0	0	0	0	0	0	0	0	0	0	0	0	0	0	0	1	3	2	1	1	0	0	0	0	0	0	0	1	4.22	128	35.4	221
1817	1172749	0	2	52	0	1	0	0	0	1	0	0	0	0	0	0	0	0	0	0	0	0	0	0	0	0	0	0	0	1	0	0	2	3	1	1	0	0	0	0	0	0	0	0	0	3.5	107	29.9	138
1818	1011179	0	2	70	1	0	0	0	0	0	0	0	1	0	0	0	0	0	0	0	0	0	0	0	0	0	1	0	0	0	0	0	1	3	2	1	0	0	0	0	1	0	0	0	1	3.15	98	27.4	84
1819	1191877	0	2	52	0	0	0	0	0	0	1	0	1	0	0	0	0	0	0	0	1	0	0	1	0	0	0	0	0	1	0	0	1	3	1	1	0	0	0	0	0	0	0	0	0	4.65	148	40.7	281
1820	1192557	1	1	74	1	1	0	0	1	1	0	0	1	0	0	0	0	0	0	1	0	0	0	0	0	0	0	0	0	1	1	0	1	3	2	1	1	1	1	1	1	0	0	0	1	3.25	107	32.3	269
1821	1190316	0	1	63	0	1	1	1	0	0	1	0	0	0	0	0	0	0	0	0	0	0	0	0	0	0	0	0	0	0	1	1	1	2	2	0	0	0	0	0	0	0	1	0	0	2.84	81	24.7	255
1822	1191531	0	1	58	0	1	0	0	1	0	0	0	1	0	0	0	0	0	0	0	0	0	0	0	0	0	0	0	0	1	0	0	1	2	2	0	0	0	0	0	0	0	0	0	0	3.6	143	41.9	169
1823	1173637	0	2	80	1	1	1	0	0	0	0	0	0	0	0	0	0	0	0	0	0	0	0	0	0	0	0	0	0	0	0	0	1	3	1	1	0	0	0	0	0	0	0	0	0	3.23	94	27	75
1824	1189226	0	2	77	1	0	1	0	0	0	0	1	0	0	0	0	0	0	0	0	0	0	0	0	0	0	0	0	0	1	0	1	1	3	1	1	0	0	0	0	0	0	0	0	0	2.6	82	23.9	159
1825	1189917	1	2	18	0	0	1	0	0	0	0	0	0	0	0	0	0	0	0	0	0	0	0	0	0	0	1	0	0	0	1	1	1	3	2	1	1	1	1	1	0	0	0	0	1	2.6	76	21.1	69
1826	1191414	1	1	74	1	1	0	0	1	0	0	0	0	0	0	0	0	0	0	0	0	0	0	0	0	0	0	0	0	1	0	0	1	1	2	0	1	0	0	0	0	0	0	0	0	3.27	114	34.9	173
1827	1190493	0	2	63	0	0	0	0	0	0	0	0	1	0	0	0	0	0	0	0	0	0	0	0	0	0	0	0	0	1	0	0	2	3	2	0	0	0	0	0	0	0	0	0	0	4	124	33.9	148
1828	1189767	0	2	75	1	0	0	0	0	0	0	0	0	0	0	0	0	0	0	0	0	0	0	0	0	0	0	0	0	0	0	1	2	3	2	0	0	0	0	0	0	0	0	0	0	2.64	86	24.4	475
1829	1184390	0	2	66	1	1	0	0	0	1	1	0	0	0	1	0	0	0	0	0	0	0	0	0	0	0	0	0	0	0	0	1	2	3	1	0	0	0	0	0	0	0	0	0	0	1.92	54	19	179
1830	1188698	1	1	69	1	0	1	0	1	1	0	0	0	0	0	0	0	0	0	1	0	0	0	0	1	1	0	0	0	0	1	1	1	3	2	0	1	0	0	0	1	0	0	0	1	2.82	88	28.3	79
1831	871414	0	2	44	0	1	0	0	0	0	0	0	1	0	0	0	0	0	0	0	0	0	0	0	0	0	0	0	1	1	1	0	2	3	2	1	0	0	0	0	0	0	0	0	0	4.5	131	39	82
1832	1138965	0	1	24	0	1	0	0	0	0	1	0	0	0	0	0	0	0	0	0	0	0	1	0	0	0	0	1	1	1	0	0	1	2	1	1	0	0	0	0	0	0	0	0	0	3.47	107	29.3	313
1833	1184107	1	2	72	1	1	1	0	0	0	0	1	0	0	0	0	0	0	0	0	0	0	0	0	0	0	0	0	0	1	1	0	4	3	1	0	0	0	0	0	0	0	0	1	1	4.2	119	35.7	140
1834	1143738	0	1	67	1	0	0	0	0	0	0	0	0	0	0	0	0	0	0	0	0	0	0	0	0	0	0	1	0	1	0	0	3	3	1	0	0	0	0	0	0	0	0	0	0	4.32	132	38.6	167
1835	1183283	0	1	45	0	0	0	0	0	0	0	0	0	0	0	0	0	0	0	0	0	0	0	0	0	0	0	0	0	0	0	0	2	3	2	0	0	0	0	0	0	0	0	0	0	2.76	83	23.2	310
1836	1094563	0	1	85	1	1	1	1	0	1	0	1	1	0	0	0	0	0	0	0	0	0	0	0	0	0	0	0	0	1	0	0	1	1	1	0	0	0	0	0	0	0	0	0	0	3.74	112	35.6	191
1837	1107175	1	2	48	0	1	0	0	0	0	0	0	0	0	0	0	0	0	0	0	0	0	0	0	1	1	0	0	0	1	0	1	2	3	2	0	0	0	0	1	1	0	0	0	1	3.09	84	28.5	186
1838	1110910	0	2	78	1	1	0	0	0	1	0	0	0	0	0	0	0	0	0	1	0	0	0	0	0	0	0	0	0	1	0	0	1	3	2	0	0	0	0	0	0	0	0	0	0	4.24	125	36.5	290
1839	1113802	0	1	53	0	0	0	0	0	0	0	0	0	0	0	0	0	0	0	0	0	0	0	0	0	0	0	0	0	0	0	0	1	3	2	1	0	0	0	0	0	0	0	1	1	3.33	104	35.3	189
1840	1114699	0	1	41	0	0	0	0	0	0	1	0	0	0	0	0	0	0	0	0	0	0	0	0	0	0	0	0	0	0	0	0	1	3	1	0	0	0	0	0	1	0	0	0	1	3.42	104	31.5	316
1841	1108594	0	2	19	0	1	0	0	0	0	0	0	1	0	0	0	0	0	0	0	0	0	0	0	0	0	0	0	1	1	1	1	2	3	1	1	0	0	0	0	0	0	0	0	0	3	90	27.9	112
1842	1114037	0	2	54	0	0	0	0	0	0	0	0	1	0	0	0	0	0	0	0	0	0	0	0	0	0	0	0	0	1	0	0	1	3	1	0	0	0	0	0	0	0	0	0	0	3.63	111	33.9	178
1843	1116468	1	1	36	0	0	0	0	0	0	0	0	0	0	0	0	0	0	0	0	0	0	0	0	0	1	0	0	0	1	0	1	1	3	2	1	0	0	0	1	0	0	0	0	0	2.39	74	20.8	331
1844	1119617	1	2	67	1	0	0	0	0	1	0	0	0	0	1	0	0	0	0	0	0	0	1	0	0	0	1	0	0	0	1	1	1	2	2	1	1	1	1	1	0	1	1	0	1	1.71	50	14.9	35
1845	1122001	0	1	64	0	1	1	0	0	1	0	0	0	0	0	0	0	0	0	0	1	1	0	1	0	0	0	0	0	1	0	0	1	2	1	0	0	0	0	0	1	1	0	0	1	4.82	141	41	48
1846	1120544	0	2	67	1	0	0	0	0	0	0	0	0	0	0	0	0	0	0	0	0	0	0	0	0	0	0	0	1	1	1	0	2	3	1	1	0	0	0	0	0	0	0	0	0	5.14	145	43.8	350
1847	1123723	0	1	52	0	1	1	0	0	0	1	0	0	0	0	0	0	0	0	0	0	0	0	0	0	0	0	0	0	0	0	0	2	3	1	0	0	0	0	0	0	0	0	0	0	4.16	120	34.8	231
1848	1126046	0	2	37	0	0	0	0	0	0	0	0	0	0	0	0	0	0	0	0	0	0	0	0	0	0	0	0	1	1	0	1	2	3	1	0	0	0	0	0	0	0	0	0	0	2.85	83	25.3	293
1849	1132439	0	1	71	1	0	0	0	0	0	0	0	0	0	0	0	0	0	0	0	0	0	0	0	0	0	0	0	0	1	0	0	3	3	1	1	0	0	0	0	0	0	0	0	0	3.26	96	27.9	213
1850	1129732	1	2	66	1	1	1	0	0	1	0	1	0	0	0	0	0	0	0	0	0	0	0	0	0	0	0	0	0	0	0	1	1	3	1	1	1	1	0	0	0	1	0	1	1	2.2	65	22.1	39
1851	1132008	0	1	53	0	0	0	0	0	0	0	0	0	0	0	0	0	0	0	0	0	0	0	0	0	0	0	0	0	0	0	0	3	3	2	0	0	0	0	0	0	0	0	0	0	3.97	129	36.9	162
1852	1137719	1	1	66	1	1	1	0	1	1	0	0	0	0	0	0	0	0	0	1	0	0	0	0	0	0	1	0	0	1	0	0	1	3	2	1	1	1	1	1	0	0	0	1	1	3.36	101	30	63
1853	1145003	0	1	44	0	1	0	0	0	0	0	0	0	0	0	0	0	0	0	0	0	0	0	0	0	0	0	0	0	0	0	0	2	1	1	0	0	0	0	0	0	0	0	0	0	4.75	145	41.9	180
1854	1147635	0	1	44	0	0	0	0	0	0	0	0	0	0	0	0	0	0	0	0	0	0	0	0	0	0	0	0	1	1	0	0	1	3	1	0	0	0	0	0	0	0	0	0	0	4.35	124	36	227
1855	1148599	0	2	50	0	1	0	0	0	0	0	0	0	0	0	0	0	0	0	0	0	0	0	0	0	0	0	0	1	1	0	0	1	3	1	1	0	0	0	0	0	0	0	0	0	3.59	105	31	224
1856	1149403	0	1	33	0	0	0	0	0	0	0	0	0	0	0	0	0	0	0	0	0	0	0	0	0	0	0	0	1	1	1	0	2	3	1	0	0	0	0	0	0	0	0	0	0	5.36	158	46.9	269
1857	1051199	0	1	32	0	0	1	1	0	0	1	0	0	0	0	0	0	0	0	0	0	0	0	0	0	0	0	0	0	0	0	0	1	3	1	0	0	0	0	0	0	0	0	0	0	3.59	103	30.6	266
1858	1155047	1	2	48	0	0	0	0	0	0	0	0	0	0	0	0	0	0	0	1	0	0	0	0	0	0	0	0	0	0	0	0	1	3	1	0	0	0	1	0	0	0	0	0	1	4.14	120	34.8	192
1859	1153188	0	2	34	0	0	0	0	0	0	0	0	1	0	0	0	0	0	0	0	0	0	0	0	0	1	0	0	1	1	1	0	1	3	2	1	0	0	0	0	1	1	0	0	1	3.64	108	31	51
1860	1162539	1	2	62	0	0	0	0	0	0	1	0	0	0	0	0	0	0	0	0	0	0	0	0	0	0	1	0	0	0	1	0	1	3	2	1	1	0	1	1	0	0	0	0	1	3.63	106	34.8	182
1861	1146256	0	1	69	1	1	0	0	0	1	0	0	1	0	0	0	0	0	0	0	0	0	0	0	0	0	1	0	0	0	0	0	1	3	2	1	0	0	0	0	0	0	0	0	0	3	94	27.3	140
1862	1165800	0	1	50	0	0	0	0	0	0	0	0	0	0	1	0	0	0	0	0	0	0	0	0	0	0	0	0	0	1	0	0	2	2	2	1	0	0	0	0	0	0	0	0	0	4.34	130	39.8	135
1863	1158742	1	2	49	0	1	0	0	1	0	1	0	0	0	0	0	0	0	0	0	0	0	0	0	0	0	1	0	0	1	0	1	1	2	2	1	0	0	0	0	0	0	0	0	0	2.83	79	22.3	167
1864	1189074	0	1	70	1	0	0	0	0	0	0	0	0	0	0	0	0	0	0	0	0	0	0	0	0	0	0	0	1	1	1	0	2	3	1	0	0	0	0	0	0	0	0	0	0	4.14	119	33.6	201
1865	1192364	0	2	51	0	0	0	0	0	0	0	0	0	0	0	0	0	0	0	0	1	0	0	1	0	0	0	0	0	1	0	0	1	2	1	0	0	0	0	0	0	0	0	0	0	4.34	129	39.8	254
1866	1180684	0	1	19	0	0	0	0	0	0	0	0	0	0	0	0	0	0	0	0	0	0	0	0	0	0	0	0	0	1	1	0	1	3	1	0	0	0	0	0	0	0	0	0	0	5.45	166	46.8	403
1867	952488	1	2	82	1	1	0	0	0	1	1	1	0	0	0	0	0	0	0	0	0	0	0	0	0	0	1	0	0	1	0	1	1	3	2	1	1	0	1	1	0	0	0	1	1	3.18	90	26	156
1868	1187302	1	2	80	1	1	0	0	1	1	0	0	0	0	0	0	0	0	0	0	0	0	0	0	0	0	0	1	0	1	0	1	1	2	2	0	1	0	0	0	0	0	0	0	0	2.74	89	25.4	218
1869	1194858	0	1	77	1	1	1	1	0	0	0	0	0	0	0	0	0	0	0	0	0	0	0	0	0	0	0	0	1	0	0	0	2	2	2	0	0	0	0	0	0	0	0	0	0	3.69	114	35	189
1870	1095467	1	2	60	0	1	0	0	0	0	0	0	0	0	0	0	0	0	0	0	0	0	0	0	1	1	0	0	0	0	1	1	1	2	2	0	0	0	0	0	0	0	0	0	0	2.31	91	27.2	89
1871	1017404	1	1	67	1	1	0	0	0	0	1	0	0	0	0	0	0	0	0	0	0	0	0	0	0	1	1	0	0	0	1	0	1	2	2	1	0	1	1	1	1	0	0	1	1	3.1	125	31.6	85
1872	1100691	1	2	73	1	1	0	0	0	0	0	0	0	0	0	0	0	0	0	0	0	0	0	0	0	0	0	0	0	0	0	1	1	1	2	0	0	0	0	0	0	0	1	1	1	2.1	53	36.4	119
1873	1101437	1	1	49	0	1	0	0	0	0	0	0	0	0	0	0	0	0	0	0	0	0	0	0	1	1	0	0	0	0	1	1	2	2	2	0	0	0	0	0	0	0	0	0	0	2.97	148	42.8	178
1874	1104452	0	2	74	1	0	0	0	0	0	0	0	1	1	0	0	0	0	0	0	1	1	0	1	0	1	0	0	0	0	0	0	2	3	2	1	1	1	1	0	1	0	0	1	1	2.86	105	31.1	201
1875	1057193	0	1	37	0	0	0	0	0	1	0	0	1	0	0	0	0	0	0	0	0	0	0	0	1	1	0	0	0	0	0	0	1	3	2	0	0	0	0	1	0	0	0	0	0	4.64	155	44	322
1876	1104884	1	1	46	0	1	0	0	0	0	0	0	0	0	0	0	0	0	0	0	0	0	0	0	1	1	0	0	0	0	0	0	2	2	2	0	0	0	0	1	0	0	0	0	0	3.87	119	40	64
1877	1105061	0	1	52	0	0	0	0	0	0	0	0	1	1	0	0	0	0	0	0	0	0	0	0	0	0	1	0	0	0	0	0	1	3	2	0	0	1	0	1	1	0	0	0	0	2.43	90	35.6	67
1878	1078318	0	1	46	0	0	0	0	0	0	0	0	1	1	0	0	0	0	0	0	0	0	0	0	0	1	0	0	0	0	0	1	1	2	2	0	0	0	0	1	1	1	1	0	1	2.6	79	25.3	20
1879	1105702	1	2	51	0	0	0	0	0	0	0	0	0	0	0	0	0	0	0	0	0	0	0	0	1	1	0	0	0	1	0	0	1	2	2	0	0	0	1	1	0	0	0	0	0	3.28	96	30.1	165
1880	1107456	1	1	32	0	1	0	0	0	0	0	0	0	0	0	0	0	0	0	0	0	0	0	0	1	1	0	0	0	1	0	0	2	1	2	0	0	0	0	1	0	0	0	0	0	4.85	149	46.9	126
1881	1107693	1	1	52	0	0	0	0	0	1	1	0	0	0	0	0	0	0	0	0	0	0	0	0	1	1	0	0	0	0	0	0	2	1	2	0	0	0	0	1	0	0	0	0	0	4.88	130	37.9	112
1882	1108658	1	2	43	0	0	0	0	0	1	0	0	0	0	0	0	0	0	0	0	0	0	0	0	1	1	0	0	0	1	0	1	1	3	2	1	1	1	1	1	0	0	1	1	1	2.67	78	24.5	61
1883	1103160	1	2	60	0	0	0	0	0	0	0	0	0	0	0	0	0	0	0	0	0	0	0	0	0	1	1	0	0	1	1	1	1	3	1	1	1	1	1	1	1	0	1	1	1	2.04	65	19.3	235
1884	1108210	0	1	77	1	0	0	0	0	0	0	0	0	0	0	0	0	0	0	0	1	0	0	1	0	1	0	0	0	1	0	0	3	3	1	0	0	0	0	0	0	0	0	0	0	4.37	129	36.5	91
1885	1108333	0	2	48	0	0	0	0	0	0	0	0	0	0	0	0	0	0	0	0	1	0	0	1	0	1	0	0	0	0	0	0	1	2	2	0	0	0	0	0	0	0	0	0	0	3.53	116	35.3	118
1886	1108138	0	1	64	0	1	0	0	0	0	0	0	0	0	0	0	0	0	0	0	1	0	0	1	0	1	0	0	0	0	0	0	1	1	2	0	0	0	0	0	0	0	0	0	0	4.04	148	45.3	118
1887	1108690	0	2	46	0	0	0	0	0	0	0	0	0	0	0	0	0	0	0	0	0	0	0	0	0	1	0	0	0	1	0	0	1	3	2	0	0	0	0	0	0	0	0	0	0	4.22	129	38.6	124
1888	1109319	0	1	75	1	1	0	0	0	0	0	0	0	0	0	0	0	0	0	0	1	1	0	1	0	1	0	0	0	0	0	0	1	1	2	0	0	0	0	0	0	0	0	0	0	3.39	134	39.6	181
1889	1111552	0	1	43	0	0	0	0	0	0	0	0	1	1	0	0	0	0	0	0	0	0	0	0	0	0	0	0	0	0	0	0	1	2	2	0	0	0	0	0	1	0	1	1	1	3.7	147	45.3	149
1890	1034848	1	1	81	1	1	0	0	0	1	0	0	0	0	0	0	0	0	0	1	0	0	0	0	0	0	0	0	0	0	0	0	4	3	2	0	1	1	1	1	0	0	1	1	1	2.77	73	39	137
1891	1111085	0	1	69	1	0	0	0	0	0	0	0	0	0	0	0	0	0	0	0	0	0	0	0	0	0	0	0	0	1	0	0	1	3	2	1	0	0	0	0	1	0	0	0	1	4.03	148	47.1	382
1892	1006058	0	1	15	0	0	0	0	0	0	0	0	0	0	0	1	0	0	0	0	0	0	0	1	0	0	0	0	0	1	0	0	1	3	2	1	1	1	0	0	1	1	0	0	0	2.1	64	18.4	9
1893	1110060	1	2	34	0	1	0	0	0	0	0	0	0	0	0	0	0	0	0	0	1	0	0	1	0	1	0	0	1	1	1	0	1	3	2	1	1	0	1	1	1	1	1	0	1	2.72	81	23.7	38
1894	1108463	1	1	30	0	1	0	0	0	0	0	0	0	0	0	0	0	0	0	0	0	0	0	0	1	1	0	0	0	1	0	0	1	3	2	0	0	0	0	1	0	0	0	0	0	4.08	119	37	116
1895	1101421	0	1	75	1	0	0	0	0	0	0	0	0	0	0	0	0	0	0	0	0	0	0	0	0	0	0	0	0	1	0	0	2	3	2	0	0	1	0	0	0	0	0	1	0	2.89	86	28.2	148
1896	1112936	1	1	65	1	0	0	0	0	0	0	0	0	0	0	0	0	0	0	0	0	0	0	0	0	0	0	0	0	0	1	0	1	2	2	0	0	0	1	1	0	1	0	0	0	3.69	117	36	42
1897	1112108	1	1	46	0	1	0	0	0	0	0	0	0	0	0	0	0	0	0	0	0	0	0	0	1	1	0	0	0	0	0	0	1	2	2	0	1	1	0	1	0	0	0	0	0	3.44	104	31.6	262
1898	1114017	0	1	39	0	1	0	0	0	0	0	0	0	0	0	0	0	0	0	0	0	0	0	0	1	1	0	0	0	0	0	0	1	1	2	0	0	0	0	0	0	0	0	0	0	3.82	117	38.8	183
1899	1114745	0	1	50	0	0	0	0	0	0	0	0	0	0	0	0	0	0	0	0	0	0	0	0	0	1	0	0	0	0	0	0	2	2	2	0	0	0	0	0	1	0	0	0	0	3.39	108	32.4	295
1900	1105039	0	1	65	1	0	0	0	0	1	0	0	0	0	0	0	0	0	0	0	1	0	0	1	0	1	0	0	0	0	0	0	4	1	2	0	0	0	0	0	0	0	0	0	0	3.89	113	33.2	109
1901	1115328	1	1	86	1	0	0	0	0	1	0	1	1	0	0	0	0	0	0	0	0	0	0	0	0	0	0	0	0	0	1	0	1	3	2	1	1	1	1	1	0	0	0	1	1	2.5	77	23.1	174
1902	1116755	1	2	66	1	1	1	0	0	1	0	0	0	0	0	0	0	0	0	0	0	0	0	0	1	1	0	0	0	0	0	0	1	3	2	0	1	0	1	1	0	0	0	1	1	3.58	111	31.7	109
1903	1116124	1	1	76	1	1	0	0	0	0	0	1	0	0	0	0	0	0	0	0	0	0	0	0	0	1	0	0	0	0	0	0	2	2	2	0	0	0	0	1	0	0	0	1	0	2.64	82	24.4	64
1904	1117481	0	2	39	0	1	1	0	0	0	0	0	1	0	0	0	0	0	0	0	0	0	0	0	0	1	0	0	1	1	0	0	1	2	2	1	0	0	0	0	1	0	0	0	0	2.49	73	21.8	135
1905	1118421	1	1	28	0	0	0	0	0	0	0	1	0	0	0	0	0	0	0	0	1	0	0	1	0	1	0	0	0	0	0	0	1	3	2	0	1	1	1	1	1	0	0	1	1	4.54	140	42.6	207
1906	1107291	0	2	48	0	0	0	0	0	0	0	0	1	1	0	0	0	0	0	0	1	0	0	1	0	0	0	0	0	1	0	0	1	3	2	0	0	0	0	0	1	0	0	1	1	3.44	120	31.9	79
1907	1120329	1	2	51	0	1	0	0	0	0	1	0	0	0	0	0	0	0	0	0	0	0	0	0	0	1	0	0	0	1	0	0	1	3	2	1	1	0	0	0	1	0	1	0	1	24	160	45	157
1908	1120450	1	1	86	1	1	0	0	0	1	0	1	0	0	0	0	0	1	0	0	0	0	0	0	0	0	1	0	0	0	1	0	1	2	2	0	1	1	1	1	0	0	0	1	1	3.55	110	36.2	207
1909	1121945	1	1	45	0	0	0	0	0	0	0	1	0	0	0	0	0	0	0	0	0	0	0	0	1	1	1	0	0	0	0	0	1	2	2	1	1	1	1	1	1	1	0	1	1	3	90	26.8	36
1910	1123067	1	1	79	1	1	0	0	0	0	1	0	1	0	0	0	0	0	0	0	0	0	0	0	0	1	0	0	0	0	0	0	1	3	2	1	1	0	1	1	1	0	0	0	1	3.74	113	31.2	169
1911	1118379	0	1	62	0	1	0	0	0	0	0	0	1	1	0	0	0	0	0	0	0	0	1	0	0	0	0	0	0	0	1	0	1	2	2	0	0	0	0	0	1	1	0	1	0	3.69	114	29.8	48
1912	983508	0	1	55	0	0	1	0	0	0	0	0	0	0	0	0	1	0	0	0	0	0	0	1	0	0	0	0	0	0	0	1	1	1	2	0	0	0	0	0	0	1	0	0	0	3.08	67	19.9	35
1913	1119588	0	1	67	1	0	0	0	0	0	0	0	1	1	0	0	0	0	0	0	1	0	0	1	0	1	0	0	0	0	1	0	1	3	2	0	0	0	0	0	1	0	0	0	0	4.9	128	38.9	178
1914	1123171	1	1	46	0	1	0	0	0	0	0	0	0	0	0	0	0	0	0	0	0	0	0	0	1	1	0	0	0	0	0	0	2	3	2	0	0	0	0	1	0	0	0	0	0	3.48	102	30	80
1915	1119111	1	1	45	0	0	0	0	0	1	0	0	1	0	0	0	0	0	0	0	0	0	0	0	0	0	0	0	0	1	0	0	1	2	2	1	0	0	0	0	1	0	0	0	0	4.22	123	37	78
1916	1123804	0	2	79	1	1	1	0	1	1	0	0	0	0	0	0	0	0	0	0	0	0	0	0	0	0	0	0	0	1	1	1	1	2	2	0	1	0	0	0	0	0	0	0	0	2.85	77	23.5	250
1917	1124471	0	1	56	0	0	0	0	0	0	0	0	0	0	0	0	0	0	0	0	1	0	0	1	0	1	0	0	0	0	0	0	1	2	2	0	0	0	0	0	0	0	0	0	0	4.03	120	36.9	180
1918	1121880	0	1	61	0	0	0	0	0	0	0	0	0	0	0	0	0	0	0	0	1	0	0	1	0	1	0	0	0	0	0	1	2	3	2	0	0	0	0	0	0	0	0	0	0	3.85	95	27.8	135
1919	1122616	0	1	52	0	1	0	0	0	0	0	1	1	0	0	0	0	0	0	0	0	0	0	0	1	1	0	0	1	0	0	1	1	2	2	0	0	0	0	1	0	0	0	0	0	2.27	70	21.6	82
1920	1124750	0	1	58	0	1	1	0	0	0	0	0	0	0	0	0	0	0	0	0	1	0	0	1	0	1	0	0	0	0	1	1	2	2	2	0	0	0	0	1	0	0	0	0	0	3.49	101	29.7	120
1921	1122906	1	2	52	0	0	0	0	0	1	0	0	0	0	0	0	0	0	0	0	0	0	0	0	1	1	1	0	0	1	0	0	1	3	2	0	1	1	1	1	1	0	0	1	1	3.11	86	46.2	77
1922	878007	1	1	26	0	1	0	0	0	1	1	0	0	0	0	0	0	0	0	0	0	0	0	0	0	0	0	0	0	1	1	0	1	2	2	1	1	1	0	1	1	0	0	0	1	3.99	154	36.3	107
1923	913298	1	1	75	1	1	0	0	0	0	0	0	0	0	0	0	0	0	0	0	0	0	0	0	0	0	0	1	0	1	0	1	2	1	2	0	0	0	1	1	0	0	0	0	0	2.26	64	21.9	130
1924	1128462	0	1	64	0	0	0	0	0	0	0	0	1	1	0	0	0	0	0	0	1	0	0	1	0	1	0	0	0	0	0	0	1	2	2	0	0	0	0	1	1	1	0	0	0	4.07	128	39.5	42
1925	1127016	0	1	62	0	0	0	0	0	1	0	0	1	0	0	0	0	0	0	0	0	0	0	0	1	1	0	0	0	1	0	0	1	2	2	0	1	0	0	0	0	0	0	0	0	4.24	152	44.9	161
1926	1127693	1	2	42	0	0	0	0	0	1	0	0	0	0	0	0	0	0	0	0	0	0	0	0	1	1	0	0	0	1	0	0	1	3	2	0	1	1	1	1	1	0	0	0	1	4.02	113	34.4	70
1927	1129870	1	1	63	0	0	0	0	0	1	1	0	0	0	0	0	0	0	0	0	0	0	0	0	1	1	0	0	0	0	0	0	2	2	2	0	1	0	0	1	1	1	0	0	1	2.72	78	23.2	47
1928	1129169	1	1	65	1	1	0	0	1	0	0	0	0	0	0	0	0	0	0	0	0	0	0	0	1	1	0	0	0	0	0	0	1	2	2	0	0	0	0	1	0	0	0	0	0	2.99	89	27	85
1929	1065618	1	1	49	0	0	0	0	0	0	0	0	1	1	0	0	0	0	0	0	0	0	1	0	0	1	0	0	0	0	0	1	1	2	2	1	0	0	0	1	1	1	1	1	1	1.8	77	17	34
1930	1129084	0	1	46	0	0	0	0	0	0	0	0	1	1	0	0	0	0	0	0	0	0	0	0	0	0	0	0	0	0	1	0	1	3	1	0	0	0	0	0	1	1	0	0	1	4.27	138	37.6	44
1931	1120026	0	1	48	0	0	0	0	0	0	0	0	1	0	0	0	0	0	0	0	1	1	0	1	0	0	0	0	0	0	0	0	4	3	2	0	0	0	0	0	0	0	0	0	0	3.49	101	29.7	61
1932	1129629	0	1	52	0	1	0	0	0	0	0	0	0	0	0	0	0	0	0	0	0	0	0	0	1	1	0	0	0	0	0	0	2	2	2	0	0	0	0	1	0	0	0	0	0	2.53	77	23.8	73
1933	1129761	0	1	16	0	1	0	0	0	0	0	0	0	0	0	0	0	0	0	0	0	0	0	0	0	0	0	0	1	1	0	0	2	3	2	0	0	0	0	0	0	0	0	0	0	4.28	127	35.5	83
1934	1127397	0	2	38	0	0	0	0	0	0	0	0	0	0	0	0	0	0	0	0	0	0	0	0	0	1	0	0	0	0	0	0	2	3	2	0	0	0	0	0	0	0	0	0	0	3.83	109	32.3	278
1935	1133016	0	1	60	0	1	0	0	0	1	0	0	0	0	0	0	0	0	0	0	0	0	0	0	1	1	0	0	0	1	0	0	1	2	2	0	0	0	0	0	0	0	0	0	0	3.01	93	37.2	109
1936	1132508	1	1	61	0	1	0	0	0	0	1	1	0	0	0	0	0	0	0	0	0	0	0	0	1	1	1	0	0	0	0	0	1	3	2	0	1	1	1	1	0	1	0	1	1	3.48	88	31.2	52
1937	1133937	1	1	51	0	1	1	1	1	1	1	0	0	0	0	0	0	0	0	0	0	0	0	0	1	1	0	1	0	1	1	0	1	1	2	0	1	0	0	0	0	0	0	0	0	4.93	142	42.3	208
1938	1134051	1	1	62	0	0	0	0	0	0	0	0	0	0	0	0	0	0	0	0	1	0	0	1	0	1	0	0	0	0	0	0	1	2	2	0	0	0	0	1	0	0	0	0	0	4.76	138	45	178
1939	1132049	0	1	43	0	0	0	0	0	0	0	0	1	1	0	0	0	0	0	0	0	0	0	0	0	1	0	0	0	0	1	1	1	2	2	0	0	0	0	1	1	0	0	0	0	3.49	94	26.9	85
1940	1135518	1	1	58	0	0	0	0	0	1	0	0	0	0	0	0	0	0	0	0	0	0	0	0	1	1	0	0	0	1	0	0	1	1	2	0	0	0	0	1	1	0	0	0	0	3.83	109	40.5	123
1941	1137185	1	1	50	0	0	0	0	0	0	0	0	0	0	0	0	0	0	0	0	0	0	0	0	0	1	1	0	0	0	1	0	1	3	2	1	0	1	0	1	1	0	0	0	0	2.72	80	23.9	501
1942	1131270	0	1	56	0	0	0	0	0	0	0	0	1	0	0	0	1	0	0	0	0	0	0	1	0	0	0	0	0	0	1	0	4	2	2	1	0	0	0	0	1	1	1	0	1	3.3	102	30.5	10
1943	1139130	0	2	51	0	0	0	0	0	0	0	0	0	0	1	0	0	0	0	0	0	0	0	0	0	0	0	0	0	1	1	0	2	1	2	0	0	0	0	0	0	1	0	0	0	3.28	86	25.6	47
1944	1138015	1	1	68	1	0	0	0	1	1	0	0	0	0	0	0	0	0	0	0	0	0	0	0	0	0	1	0	0	1	1	0	2	3	2	1	1	1	1	1	1	0	0	1	1	3.17	100	31.7	223
1945	1131937	1	1	64	0	0	0	0	0	1	0	0	0	0	0	0	0	0	0	0	0	0	0	0	1	1	0	0	0	0	0	0	1	3	2	0	1	0	0	1	1	0	0	0	0	4.51	119	36.1	255
1946	1132217	1	1	55	0	0	0	0	0	0	0	0	1	1	0	0	0	0	0	0	0	0	0	0	0	1	0	0	0	0	1	1	2	3	2	0	0	0	0	1	1	1	0	0	0	1.88	62	20.6	30
1947	1094360	1	2	43	0	0	0	0	0	1	0	0	0	0	0	0	0	0	0	0	0	0	0	0	1	1	0	0	0	0	1	1	1	1	2	0	0	0	0	1	0	0	0	0	0	3.11	77	26.1	122
1948	1139252	0	1	54	0	0	1	0	0	0	0	0	1	1	0	0	0	0	0	0	0	0	0	0	0	1	0	0	0	0	1	1	1	2	2	1	0	1	1	1	1	1	0	1	1	2.88	78	20.7	34
1949	914410	0	2	31	0	0	0	0	0	0	1	0	0	0	1	0	0	0	0	0	0	0	0	0	0	0	0	1	1	1	1	1	2	3	2	0	0	0	0	0	0	0	0	1	0	3.64	97	29.3	189
1950	1137860	0	2	45	0	1	0	0	0	0	0	0	0	0	0	0	0	0	0	0	1	0	0	1	0	1	0	1	0	0	0	0	1	2	2	0	0	0	0	0	0	0	0	0	0	4.19	122	36.2	414
1951	1141997	1	1	73	1	1	1	0	0	0	0	0	0	0	0	0	0	0	0	0	1	0	0	1	0	1	0	0	0	0	1	0	2	2	2	1	1	1	1	1	1	0	0	0	1	3.33	89	27.8	135
1952	1142995	0	1	63	0	1	1	0	0	0	0	0	0	0	0	0	0	0	0	0	0	0	0	0	0	1	0	1	0	1	0	1	1	1	2	0	0	0	0	0	0	0	0	0	0	2.86	77	22.9	161
1953	1141231	0	1	62	0	1	0	0	0	0	0	0	1	1	0	0	0	0	0	0	0	0	0	0	0	1	0	0	0	0	1	0	1	3	2	0	0	0	0	1	1	1	0	0	0	2.99	91	24.7	25
1954	1142595	0	2	44	0	0	0	0	0	0	0	0	1	1	0	0	0	0	0	0	0	0	0	0	0	1	0	0	0	0	0	0	1	3	2	0	0	0	0	0	1	0	0	0	0	2.79	85	24.5	76
1955	1142262	0	2	49	0	0	0	0	0	0	0	0	0	0	0	0	0	0	0	0	0	0	0	0	1	1	0	0	0	1	0	0	1	3	2	0	1	1	0	1	0	0	0	0	1	2.71	84	23.2	156
1956	982231	1	2	73	1	0	1	1	0	0	0	0	0	0	0	0	0	0	0	0	0	0	0	0	0	1	0	0	0	0	1	1	2	3	2	0	0	0	0	1	0	0	0	0	0	2.46	72	24.6	234
1957	1141272	0	2	50	0	0	0	0	0	1	0	1	0	0	0	0	0	0	0	0	0	0	0	0	1	1	0	0	0	0	0	0	1	2	2	0	0	0	0	0	0	0	0	0	0	3.22	95	28.4	81
1958	1143219	0	1	35	0	0	0	0	0	0	0	0	0	0	0	0	0	0	0	0	1	0	0	1	0	1	0	0	0	0	0	0	2	1	2	0	0	0	0	0	1	0	0	0	0	4.2	122	43	155
1959	1143667	1	1	84	1	1	1	1	1	1	0	0	0	0	0	0	0	0	0	0	0	0	0	0	0	0	0	0	0	1	1	0	1	2	2	1	1	1	1	1	1	0	0	0	1	3.53	104	29.4	153
1960	1145305	0	1	50	0	1	0	0	0	0	0	0	1	1	0	0	0	0	0	0	1	0	0	1	0	1	0	0	0	0	1	0	1	3	2	1	1	1	1	1	1	1	0	0	1	3.01	91	24.3	20
1961	1145481	0	1	88	1	1	0	0	0	0	0	0	0	0	0	0	0	0	0	0	1	0	0	1	0	1	0	0	0	0	1	0	1	1	2	0	0	0	0	0	0	0	0	0	0	3.08	92	26.9	176
1962	1144813	0	1	45	0	1	0	0	0	0	0	0	0	0	0	0	0	0	0	0	0	0	0	0	0	0	0	0	1	1	1	0	2	1	2	0	0	0	0	0	0	0	0	0	0	4.53	174	55.4	313
1963	1148865	0	1	43	0	0	0	0	0	0	0	0	1	1	0	0	0	0	0	0	0	0	0	0	0	1	0	0	0	0	0	1	2	1	2	0	0	0	0	1	1	0	0	1	1	2.14	75	20.3	111
1964	1144391	0	2	56	0	0	0	0	0	1	0	0	0	0	0	0	0	0	0	0	0	0	0	0	0	0	0	0	0	1	0	0	1	1	2	0	1	1	0	0	1	0	0	1	1	3.86	123	38.5	133
1965	1147618	0	2	49	0	0	0	0	0	0	0	0	0	0	0	0	0	0	0	0	1	0	0	1	0	1	0	0	0	0	0	0	1	1	2	0	0	0	0	0	0	0	0	0	0	3.56	126	37.8	163
1966	1149821	1	1	43	0	1	0	0	0	0	0	0	0	0	0	0	0	0	0	0	0	0	1	0	0	0	0	0	1	1	1	0	2	3	2	0	0	0	0	0	1	1	0	0	0	4.3	132	40.6	49
1967	1149686	0	2	58	0	1	1	0	0	1	0	0	1	1	0	0	0	0	0	0	0	0	0	0	0	0	0	0	0	0	1	0	2	3	2	0	0	0	0	0	1	0	0	0	1	2.83	94	26.1	72
1968	1150692	1	1	72	1	1	0	0	1	1	0	0	0	0	0	0	0	0	0	0	0	0	1	0	0	0	0	0	0	1	1	0	1	1	1	0	0	0	0	0	0	0	1	0	0	4.12	112	35	156
1969	1096435	0	1	52	0	0	0	0	0	1	0	0	1	1	0	0	0	0	0	0	1	0	0	1	0	0	0	0	0	1	1	1	1	1	2	0	1	1	1	0	1	0	1	1	1	3.34	90	20.7	109
1970	1148584	1	1	48	0	0	0	0	0	1	0	0	0	0	0	0	0	0	0	0	0	0	0	0	1	1	0	0	0	1	0	0	1	3	2	0	0	0	0	0	0	0	0	0	0	3.64	104	37.5	118
1971	1147208	0	1	43	0	0	0	0	0	0	0	0	1	1	0	0	0	0	0	0	0	0	0	0	0	1	1	0	0	0	1	0	1	3	2	0	0	1	0	0	1	0	0	0	1	2.82	94	28.4	74
1972	1148274	0	1	72	1	1	0	0	0	1	0	0	1	1	0	0	0	0	0	0	0	0	1	0	0	0	0	0	0	1	1	1	1	2	2	0	0	0	0	0	1	1	0	0	0	3.08	101	27.4	45
1973	1166552	0	1	68	1	1	1	0	1	1	0	0	0	0	1	0	0	0	0	1	0	0	0	0	0	0	0	1	0	0	1	1	3	1	1	0	0	0	0	0	0	0	0	0	0	3.4	101	34.3	139
1974	1151134	1	2	56	0	0	1	0	0	0	0	0	0	0	0	0	0	0	0	0	0	0	0	0	0	0	1	0	0	1	1	1	1	3	1	0	0	0	0	0	1	0	0	0	1	4.5	91	30	62
1975	1147285	0	1	31	0	0	0	0	0	0	0	0	0	0	0	0	0	0	0	0	0	0	0	0	0	0	0	0	1	1	1	0	2	3	1	0	0	0	0	0	0	1	0	0	0	3.8	123	36	26
1976	1141645	1	2	43	0	0	0	0	0	1	0	0	0	0	0	0	0	0	0	0	0	0	0	0	1	1	0	0	0	1	0	1	2	3	1	0	1	0	0	1	1	0	0	0	1	2.91	91	28	314
1977	1151607	1	2	59	0	0	1	0	0	1	0	0	1	0	0	0	0	0	0	0	0	0	0	0	1	1	1	0	0	1	0	0	1	3	2	0	1	1	1	1	1	0	0	0	1	3.69	106	46	151
1978	1151264	1	1	76	1	1	0	0	0	0	1	1	0	0	0	0	0	0	0	0	0	0	0	0	0	1	1	0	0	1	1	0	1	2	1	0	0	0	0	1	0	0	0	1	0	3.79	112	34.3	84
1979	1153658	1	1	67	1	1	0	0	0	0	0	0	0	0	0	0	0	0	0	0	1	0	0	1	0	1	1	0	0	0	1	1	1	2	2	0	1	1	1	1	1	0	0	1	1	4.32	125	36.4	252
1980	1153015	0	2	77	1	0	0	0	0	0	0	0	1	1	0	0	0	0	0	0	1	1	0	1	0	1	0	0	0	0	0	1	1	1	2	0	0	0	0	0	1	0	0	0	0	3.34	100	30.5	212
1981	1153787	0	1	52	0	0	0	0	0	0	0	0	1	1	0	0	0	0	0	0	0	0	0	0	0	1	0	0	0	1	1	1	1	3	2	0	0	0	0	0	1	1	0	0	0	3.02	91	26	55
1982	1153415	1	1	63	0	1	1	0	0	1	0	0	0	0	0	0	0	0	0	0	0	0	0	0	1	1	0	0	0	0	0	0	1	1	2	0	0	0	0	1	0	0	0	0	0	4.73	88	40.1	252
1983	914175	1	1	58	0	1	1	0	0	0	0	1	0	0	0	0	0	0	0	0	0	0	0	0	0	1	1	0	0	1	1	1	1	3	2	1	1	1	1	1	1	0	0	1	1	3.08	80	27.1	478
1984	1155412	0	1	64	0	0	0	0	0	0	0	0	1	1	0	0	0	0	0	0	1	0	0	1	0	1	0	0	0	0	0	0	1	2	2	0	0	0	0	0	1	0	0	0	0	2.72	80	24	123
1985	1156417	1	2	51	0	0	0	0	0	1	0	0	0	0	0	0	0	0	0	0	0	0	0	0	1	1	0	0	0	1	0	0	1	1	2	0	0	0	0	0	0	0	0	0	0	4.09	125	37.3	71
1986	1156574	0	1	75	1	0	1	0	0	0	0	0	0	0	0	0	1	0	0	0	0	0	0	1	0	0	0	0	0	1	0	1	2	3	2	0	0	1	0	0	0	0	0	0	0	1.63	51	16.6	125
1987	1157302	0	2	58	0	1	0	0	0	0	0	0	1	0	0	0	0	0	0	0	1	0	0	1	0	1	0	0	0	0	0	0	1	2	2	0	0	0	0	0	0	0	0	0	0	2.92	89	26	61
1988	1033524	0	1	75	1	1	0	0	0	0	1	0	0	0	0	0	0	0	0	0	0	0	0	0	0	1	0	0	0	0	1	1	1	1	2	1	1	0	0	1	0	1	0	0	0	3.27	93	27.4	58
1989	1157161	0	1	41	0	0	0	0	0	0	0	0	1	1	0	0	0	0	0	0	0	0	0	0	0	1	0	0	0	0	1	1	1	2	1	0	0	1	0	0	1	0	0	0	0	2.05	61	18	327
1990	1157615	0	1	16	0	0	0	0	0	0	0	0	0	0	0	0	0	0	0	0	0	0	0	0	0	0	0	0	1	1	0	0	2	2	2	0	0	0	0	0	0	0	0	0	0	3.73	114	33	163
1991	1161002	0	1	48	0	0	0	0	0	0	0	0	0	0	0	0	0	0	0	0	0	0	0	0	0	1	0	0	0	0	1	0	3	1	2	0	0	0	0	0	0	0	0	0	0	4.52	135	39.1	132
1992	1161541	0	1	42	0	0	0	0	0	0	0	0	1	1	0	0	0	0	0	0	0	0	0	0	0	1	0	0	0	0	0	0	1	1	2	0	0	0	1	1	1	0	0	1	1	2.49	82	35.9	61
1993	967844	1	2	79	1	1	0	0	0	1	0	0	1	1	0	0	0	0	0	0	0	0	0	0	0	0	0	1	0	0	0	1	2	2	1	0	1	0	0	0	0	0	0	1	1	2.06	57	19.2	84
1994	1160924	1	1	50	0	0	1	0	0	0	0	1	0	0	0	0	0	0	0	0	0	0	0	0	0	0	1	0	0	1	1	0	2	3	2	1	1	1	1	1	1	0	0	1	1	4.08	147	41	163
1995	1162546	0	1	49	0	1	1	0	0	0	0	0	1	1	0	0	0	0	0	0	0	0	0	0	0	0	0	0	0	1	1	1	1	3	2	0	0	0	0	1	1	0	0	0	1	2.21	66	33	123
1996	1156399	0	1	35	0	0	0	0	0	0	0	0	0	0	0	0	0	0	0	0	0	0	0	0	0	1	0	0	0	0	0	0	3	1	2	0	0	0	0	0	0	0	0	0	0	5	125	41.2	251
1997	911838	1	1	59	0	0	1	0	0	0	0	0	0	0	0	0	0	0	0	0	1	0	0	1	0	1	0	0	0	0	1	1	1	2	2	0	0	0	0	0	1	0	0	0	0	2.87	97	28.3	66
1998	1158529	0	1	52	0	0	1	0	0	0	0	0	1	1	0	0	0	0	0	0	0	0	0	0	0	1	0	0	0	0	0	1	1	2	2	1	0	0	0	1	1	1	0	0	0	4	119	30.8	41
1999	1162271	1	1	51	0	0	0	0	0	0	0	0	0	0	0	0	0	0	0	1	0	0	0	0	0	0	1	1	0	0	1	1	2	2	1	1	1	1	1	1	1	0	0	0	1	2.03	65	18.5	71
[truncated: 557 more rows]
[truncated: 27 more columns]
